# Supplementary material for: QTL Analysis of Stem Elongation and Flowering Time in Lettuce Using Genotyping-by-Sequencing
Source: MDPI journal article supplement (doi:10.3390/genes12060947), 2021-06-21
Supplement: s1 [file s1]

## Supplemental Materials

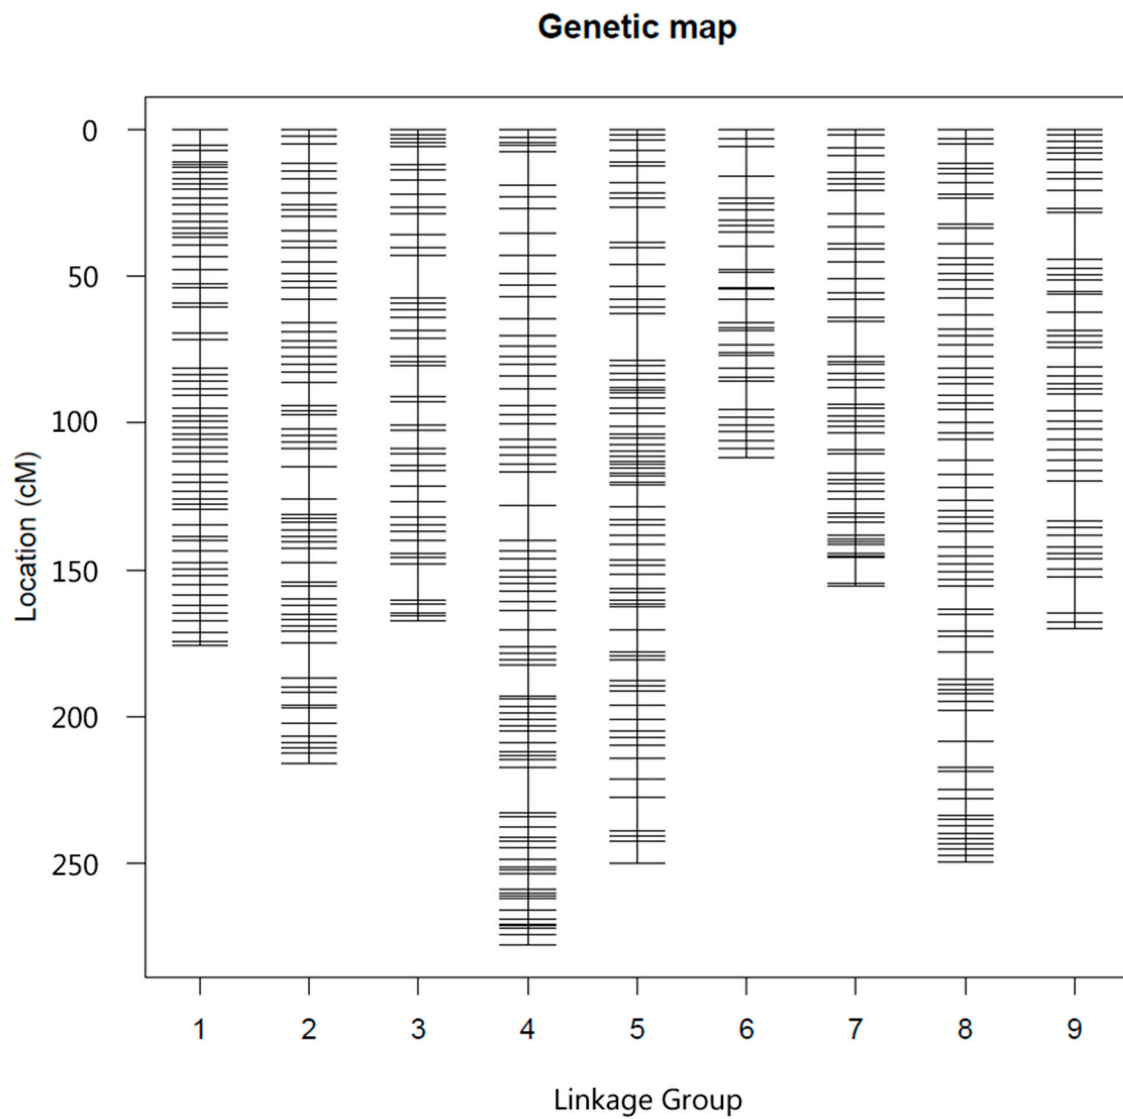

**Figure S1.** High-density intra-specific linkage map of lettuce using GBS markers.
