# Supplementary material for: QTL Analysis of Stem Elongation and Flowering Time in Lettuce Using Genotyping-by-Sequencing
Source: Genes (Basel). 2021 Jun 21;12(6):947. doi: 10.3390/genes12060947 (PMC8234873; doi:10.3390/genes12060947)
Supplement: Supplementary file 1 [file genes-12-00947-s001.zip › Table S1.xls]

## Sheet: genotype
Table S1 Genotypes of the genetic map constructed using GBS SNP markers.
SNP	1	2	3	4	5	6	7	8	9	10	11	12	13	14	15	16	17	18	19	20	21	22	23	24	25	26	27	28	29	30	31	32	33	34	35	36	37	38	39	40	41	42	43	44	45	46	47	48	49
1_5391737	BB	BB	BB	AA	AA	AA	BB	AA	BB	BB	BB	BB	BB	AB	AA	BB	BB	BB	AA	AA	AA	BB	AA	BB	AA	AA	AA	AA	BB	AA	BB	BB	AA	BB	BB	AA	AA	BB	BB	AA	BB	BB	AB	BB	BB	BB	BB	BB	BB
1_6067080	BB	BB	BB	AA	AA	BB	BB	AA	BB	BB	BB	BB	BB	AB	AA	BB	BB	BB	AA	AA	AA	BB	AA	BB	AA	AA	AA	AA	BB	AA	BB	BB	AA	BB	BB	AA	AA	BB	BB	AA	BB	BB	AB	BB	BB	BB	BB	BB	BB
1_6272998	BB	BB	BB	AA	AA	BB	BB	-	BB	BB	BB	BB	BB	AB	AA	BB	BB	BB	AA	AA	AA	BB	AA	BB	AA	AA	AA	AA	BB	AA	AB	BB	AA	BB	BB	AA	AA	BB	BB	AA	BB	BB	AB	BB	BB	BB	BB	BB	-
1_6275712	BB	BB	BB	AA	AA	BB	BB	AA	BB	BB	BB	BB	BB	AB	AA	BB	BB	BB	AA	AA	AA	BB	AA	BB	AA	AA	AA	AA	BB	AA	BB	BB	AA	BB	BB	AA	AA	BB	BB	AA	BB	BB	AB	BB	BB	BB	BB	BB	BB
1_6784056	BB	BB	BB	AA	AA	BB	BB	AA	BB	BB	BB	BB	BB	AB	AA	BB	BB	BB	AA	AA	AA	BB	AA	BB	AA	AA	AA	AA	BB	AA	BB	BB	AA	BB	BB	AA	AA	BB	BB	AA	BB	BB	AB	BB	BB	-	BB	BB	BB
1_6784064	BB	BB	BB	AA	AA	BB	BB	AA	BB	BB	BB	BB	BB	AB	AA	BB	BB	BB	AA	AA	AA	BB	AA	BB	AA	AA	AA	AA	BB	AA	BB	BB	AA	BB	BB	AA	AA	BB	BB	AA	BB	BB	AB	BB	BB	-	BB	BB	BB
1_6789265	BB	BB	BB	AA	-	BB	BB	AA	BB	BB	BB	BB	BB	AB	AA	BB	BB	BB	AA	AA	AA	BB	AA	BB	AA	AA	AA	AA	BB	AA	BB	BB	AA	BB	BB	AA	AA	BB	BB	AA	BB	BB	AB	BB	BB	BB	BB	BB	BB
1_6789338	BB	BB	BB	AA	-	BB	BB	AA	BB	BB	BB	BB	BB	AB	AA	BB	BB	BB	AA	AA	AA	BB	AA	BB	AA	AA	AA	AA	BB	AA	BB	BB	AA	BB	BB	AA	AA	BB	BB	AA	BB	BB	AB	BB	BB	BB	BB	BB	BB
1_8144762	BB	BB	BB	AA	AA	BB	BB	AA	BB	BB	BB	BB	BB	AB	AA	BB	BB	BB	BB	AA	AA	BB	AA	AA	AA	AA	AA	AA	BB	AA	BB	BB	AA	BB	BB	AA	AA	AB	BB	AB	BB	BB	AB	BB	BB	BB	BB	BB	BB
1_8901052	BB	BB	BB	AA	AA	BB	BB	AA	BB	BB	BB	BB	BB	AB	AA	BB	BB	BB	BB	AA	AA	BB	AA	AA	AA	AA	AA	AA	BB	AA	AA	BB	AA	BB	BB	AA	AA	AB	BB	AB	BB	BB	AB	BB	BB	BB	BB	AB	BB
1_10426525	BB	BB	BB	AA	AA	BB	BB	AA	BB	BB	BB	BB	BB	AB	AA	BB	BB	BB	BB	AA	AA	BB	AA	AA	AA	AA	AA	AA	BB	AA	AA	BB	AA	BB	BB	AA	AA	AB	BB	AB	BB	BB	AB	BB	BB	BB	BB	AB	BB
1_10734312	BB	BB	BB	AA	AA	BB	BB	AA	BB	BB	BB	BB	BB	AB	AA	BB	BB	BB	BB	AA	AA	BB	AA	AA	AA	AA	AA	AA	BB	AA	AA	BB	AA	BB	BB	AA	BB	AB	BB	AB	BB	BB	AB	BB	BB	BB	BB	AB	BB
1_10734441	BB	BB	BB	AA	AA	BB	BB	AA	BB	BB	BB	BB	BB	AB	AA	BB	BB	BB	BB	AA	AA	BB	AA	AA	AA	AA	AA	AA	BB	AA	AA	BB	AA	BB	BB	AA	BB	AB	BB	AB	BB	BB	AB	-	BB	BB	BB	AB	BB
1_10793239	BB	BB	BB	AA	AA	BB	BB	AA	BB	BB	BB	BB	BB	AB	AA	BB	BB	BB	BB	AA	AA	BB	AA	AA	AA	AA	AA	AA	BB	AA	AA	BB	AA	BB	BB	AA	BB	AB	BB	AB	BB	BB	AB	BB	BB	BB	BB	AB	BB
1_10793260	BB	BB	BB	AA	AA	BB	BB	AA	BB	BB	BB	BB	BB	AB	AA	BB	BB	BB	BB	AA	AA	BB	AA	AA	AA	AA	AA	AA	BB	AA	AA	BB	AA	BB	BB	AA	BB	AB	BB	AB	BB	BB	AB	BB	BB	BB	BB	AB	BB
1_11208722	BB	BB	BB	AA	AA	BB	BB	AA	BB	BB	BB	BB	BB	AA	AA	BB	BB	BB	BB	AA	AA	BB	AA	AA	AA	AA	AA	AA	BB	AA	AA	BB	AA	BB	BB	AA	BB	AB	BB	AB	BB	BB	BB	BB	BB	BB	BB	AB	BB
1_11267540	BB	BB	BB	AA	AA	BB	BB	AA	BB	BB	BB	BB	BB	AB	AA	BB	BB	BB	BB	AA	AA	BB	AA	AA	AA	AA	AA	AA	BB	AA	AA	BB	AA	BB	BB	AA	BB	AB	BB	AB	BB	BB	BB	BB	BB	BB	BB	AB	BB
1_11267890	BB	BB	BB	AA	AA	BB	BB	AA	BB	BB	BB	BB	BB	AB	AA	BB	BB	BB	BB	AA	AA	BB	AA	AA	AA	AA	AA	AA	BB	AA	AA	BB	AA	BB	BB	AA	BB	AB	BB	AB	BB	BB	BB	BB	BB	BB	BB	AB	BB
1_13065125	BB	BB	BB	AA	AA	BB	BB	AA	BB	BB	BB	BB	BB	AB	AA	BB	BB	BB	BB	AA	AA	BB	AA	AA	AA	AA	AA	AA	BB	AA	AA	BB	AA	BB	BB	AA	BB	AA	BB	AB	BB	BB	BB	BB	BB	BB	BB	AB	-
1_13065195	BB	BB	BB	AA	AA	BB	BB	AA	BB	BB	BB	BB	BB	AB	AA	BB	BB	BB	BB	AA	AA	BB	AA	AA	AA	AA	AA	AA	BB	AA	AA	BB	AA	BB	BB	AA	BB	AA	BB	AB	BB	BB	BB	BB	BB	BB	BB	AB	-
1_13448782	BB	BB	BB	AA	AA	BB	BB	AA	BB	BB	BB	BB	BB	AB	AA	BB	BB	BB	BB	AA	AA	BB	AA	AA	AA	AA	AA	AA	BB	AA	AA	BB	AA	BB	BB	AA	BB	AB	BB	AB	BB	BB	BB	BB	BB	BB	BB	AB	BB
1_13448791	BB	BB	BB	AA	AA	BB	BB	AA	BB	BB	BB	BB	BB	AB	AA	BB	BB	BB	BB	AA	AA	BB	AA	AA	AA	AA	AA	AA	BB	AA	AA	BB	AA	BB	BB	AA	BB	AB	BB	AB	BB	BB	BB	BB	BB	BB	BB	AB	BB
1_15967537	BB	BB	BB	BB	AA	BB	BB	AA	BB	BB	BB	BB	BB	AB	AA	BB	BB	BB	BB	AA	AA	BB	AA	AA	AA	AA	AA	AA	BB	BB	AB	BB	AA	BB	BB	AA	BB	AA	BB	AB	-	BB	BB	BB	BB	BB	BB	AA	BB
1_15967546	BB	BB	BB	BB	AA	BB	BB	AA	BB	BB	BB	BB	BB	AB	AA	BB	BB	BB	BB	AA	AA	BB	AA	AA	AA	AA	AA	AA	BB	BB	AB	BB	AA	BB	BB	AA	BB	AA	BB	AB	-	BB	BB	BB	BB	BB	BB	AA	BB
1_15967576	BB	BB	BB	BB	AA	BB	BB	AA	BB	BB	BB	BB	BB	AB	AA	BB	BB	BB	BB	AA	AA	BB	AA	AA	AA	AA	AA	AA	BB	BB	AB	BB	AA	BB	BB	AA	BB	AA	BB	AB	-	BB	BB	BB	BB	BB	BB	AA	BB
1_18209214	BB	BB	BB	BB	BB	BB	BB	AA	BB	BB	BB	BB	BB	AB	AA	BB	BB	BB	BB	AA	AA	BB	AA	AA	AA	AA	AA	AA	BB	BB	AB	BB	AA	BB	BB	AA	BB	AB	BB	AB	BB	BB	BB	BB	BB	BB	BB	AA	BB
1_18606193	BB	BB	-	BB	BB	BB	BB	AA	BB	BB	BB	BB	BB	AB	AA	BB	BB	BB	BB	AA	AA	BB	AA	AA	AA	AA	AA	AA	BB	BB	AB	BB	AA	BB	-	AA	BB	AB	BB	AB	BB	BB	BB	BB	BB	BB	BB	AA	BB
1_18606514	BB	BB	BB	BB	BB	BB	BB	AA	BB	BB	BB	BB	BB	AB	AA	BB	BB	BB	BB	AA	AA	BB	AA	AA	AA	AA	AA	AA	BB	BB	AA	BB	AA	BB	BB	AA	BB	AB	BB	AA	BB	BB	BB	BB	BB	BB	BB	AA	BB
1_18606527	BB	BB	BB	BB	BB	BB	BB	AA	BB	BB	BB	BB	BB	AB	AA	BB	BB	BB	BB	AA	AA	BB	AA	AA	AA	AA	AA	AA	BB	BB	AA	BB	AA	BB	BB	AA	BB	AB	BB	AA	BB	BB	BB	BB	BB	BB	BB	AA	BB
1_18625286	BB	BB	BB	BB	BB	BB	BB	AA	BB	BB	BB	BB	BB	AB	AA	BB	BB	BB	BB	AA	AA	BB	AA	AA	AA	AA	AA	AA	BB	BB	AB	BB	AA	BB	BB	AA	BB	AB	BB	AB	BB	BB	BB	BB	BB	BB	BB	AA	BB
1_18774515	BB	BB	BB	BB	BB	BB	BB	AA	BB	BB	BB	BB	BB	AB	AA	BB	BB	BB	BB	AA	AA	BB	AA	AA	AA	AA	AA	AA	BB	BB	AB	BB	AA	BB	BB	AA	BB	AA	BB	AB	BB	BB	BB	BB	BB	BB	BB	AA	BB
1_19354234	BB	BB	BB	BB	BB	BB	BB	AA	BB	BB	BB	BB	BB	AB	AA	BB	BB	BB	BB	AA	AA	BB	AA	AA	AA	AB	AA	AA	BB	BB	AA	BB	AA	BB	BB	AA	BB	AB	BB	AB	BB	BB	BB	BB	BB	BB	BB	AA	BB
1_19867573	BB	BB	BB	BB	BB	BB	BB	AA	BB	BB	BB	BB	BB	AB	AA	BB	BB	BB	BB	AA	AA	BB	AA	AA	AA	AA	AA	AA	BB	BB	AA	BB	AA	BB	BB	AA	BB	AB	BB	AB	BB	BB	BB	BB	BB	BB	BB	AA	-
1_19867630	BB	BB	BB	BB	BB	BB	BB	AA	BB	BB	BB	BB	BB	AB	AA	BB	BB	BB	BB	AA	AA	BB	AA	AA	AA	AA	AA	AA	BB	BB	AA	BB	AA	BB	BB	AA	BB	AB	BB	AB	BB	BB	BB	BB	BB	BB	BB	AA	-
1_21680127	BB	BB	BB	BB	BB	BB	BB	AA	AA	BB	BB	BB	BB	AB	AA	BB	BB	BB	BB	AA	AA	BB	AA	AA	AA	AA	AA	AA	BB	BB	AA	BB	AA	BB	BB	AA	BB	AB	BB	AB	BB	BB	BB	BB	BB	BB	BB	AA	BB
1_22224909	BB	BB	BB	BB	BB	BB	BB	AA	AA	BB	BB	BB	BB	AB	AA	BB	BB	BB	BB	BB	AA	BB	AA	AA	AA	AA	AA	BB	BB	BB	AA	BB	AA	BB	BB	AA	BB	AB	BB	AB	BB	BB	BB	BB	BB	BB	BB	AA	BB
1_22340380	BB	BB	BB	BB	BB	BB	BB	AA	-	BB	BB	BB	BB	AB	AA	BB	BB	BB	BB	BB	AA	BB	AA	AA	AA	AA	AA	BB	BB	BB	AA	BB	AA	BB	BB	AA	BB	AB	BB	AB	BB	BB	BB	BB	BB	BB	BB	AA	BB
1_22962251	BB	BB	BB	BB	BB	BB	AB	AA	AA	BB	BB	BB	BB	AB	AA	BB	BB	BB	BB	BB	AA	BB	AA	AA	AA	BB	AA	BB	BB	BB	AA	BB	AA	BB	BB	AA	BB	BB	BB	AB	BB	BB	BB	BB	BB	BB	BB	AA	BB
1_22962253	BB	BB	BB	BB	BB	BB	AB	AA	AA	BB	BB	BB	BB	AB	AA	BB	BB	BB	BB	BB	AA	BB	AA	AA	AA	BB	AA	BB	BB	BB	AA	BB	AA	BB	BB	AA	BB	BB	BB	AB	BB	BB	BB	BB	BB	BB	BB	AA	BB
1_23096238	BB	BB	BB	BB	BB	BB	BB	AA	AA	BB	BB	BB	BB	AB	AA	BB	BB	BB	BB	BB	AA	BB	AA	AA	AA	BB	AA	BB	BB	BB	AA	BB	AA	BB	BB	AA	BB	AB	BB	AB	BB	BB	BB	BB	BB	BB	BB	AA	BB
1_23266187	BB	BB	BB	BB	BB	BB	BB	AA	AA	BB	BB	BB	BB	AB	AA	BB	BB	BB	BB	BB	AA	BB	AA	AA	AA	BB	AA	BB	BB	BB	AA	BB	AA	BB	-	AA	BB	AB	BB	AB	BB	BB	BB	BB	BB	BB	BB	AA	BB
1_28098284	BB	BB	BB	BB	BB	BB	BB	AA	AA	BB	BB	BB	BB	BB	BB	BB	BB	BB	BB	BB	AA	BB	AA	AA	AA	BB	AA	BB	BB	BB	AA	BB	AA	BB	BB	AA	BB	AB	BB	BB	BB	BB	BB	BB	BB	BB	BB	AA	BB
1_30929483	AA	BB	AB	BB	BB	BB	BB	AA	AA	BB	BB	BB	BB	BB	BB	BB	BB	BB	BB	BB	AA	BB	AA	AA	AA	BB	AA	BB	BB	BB	AA	BB	AA	BB	AB	AA	BB	BB	BB	BB	BB	BB	AA	BB	BB	BB	BB	AA	BB
1_36463156	AA	BB	BB	BB	BB	BB	BB	AA	AA	BB	BB	BB	BB	BB	BB	BB	BB	BB	BB	BB	AA	BB	AA	AA	AB	BB	AA	BB	BB	BB	AA	BB	AA	BB	BB	AA	BB	BB	AA	BB	BB	BB	AA	BB	BB	BB	BB	AA	-
1_36463179	AA	BB	BB	BB	BB	BB	BB	AA	AA	BB	BB	BB	BB	BB	BB	BB	BB	BB	BB	BB	AA	BB	AA	AA	AB	BB	AA	BB	BB	BB	AA	BB	AA	BB	BB	AA	BB	BB	AA	BB	BB	BB	AA	BB	BB	BB	BB	AA	-
1_36463183	AA	BB	BB	BB	BB	BB	BB	AA	AA	BB	BB	BB	BB	BB	BB	BB	BB	BB	BB	BB	AA	BB	AA	AA	AB	BB	AA	BB	BB	BB	AA	BB	AA	BB	BB	AA	BB	BB	AA	BB	BB	BB	AA	BB	BB	BB	BB	AA	-
1_36628878	AA	BB	AB	BB	BB	BB	BB	AA	AA	BB	BB	BB	BB	BB	BB	BB	BB	BB	BB	BB	AA	BB	AA	AA	AB	BB	AA	BB	BB	BB	AA	BB	AA	BB	AB	AA	BB	BB	AA	BB	BB	BB	AA	BB	BB	BB	BB	AA	BB
1_36628914	AA	BB	AB	BB	BB	BB	BB	AA	AA	BB	BB	BB	BB	BB	BB	BB	BB	BB	BB	BB	AA	BB	AA	AA	AB	BB	AA	BB	BB	BB	AA	BB	AA	BB	AB	AA	BB	BB	AA	BB	BB	BB	AA	BB	BB	BB	BB	AA	BB
1_37537308	AA	BB	AB	BB	BB	BB	BB	AA	AA	BB	BB	BB	BB	BB	BB	BB	BB	BB	BB	BB	AA	BB	AB	AA	AB	BB	AA	BB	BB	BB	AA	BB	AA	BB	AB	AA	BB	BB	AA	BB	BB	BB	AA	BB	BB	BB	BB	AA	BB
1_37797756	AA	BB	AB	BB	BB	BB	BB	AA	AA	BB	BB	BB	BB	BB	BB	BB	BB	BB	BB	BB	AA	BB	AB	AA	AB	BB	AA	BB	BB	BB	AA	BB	AA	BB	AA	AA	BB	BB	AA	BB	BB	BB	AA	BB	BB	BB	BB	AA	BB
1_37964416	AA	BB	AB	BB	BB	BB	BB	AA	AA	BB	BB	BB	BB	BB	BB	BB	BB	BB	BB	BB	AA	BB	AB	AA	AB	BB	AA	BB	BB	BB	AA	BB	AA	BB	AB	AA	BB	BB	AA	BB	BB	BB	AA	BB	BB	BB	BB	AA	BB
1_38306462	AA	BB	AB	BB	BB	BB	BB	AA	AA	BB	BB	BB	BB	BB	BB	BB	BB	BB	BB	BB	AA	BB	AB	AA	AB	BB	AA	BB	BB	BB	AA	BB	AA	BB	AB	AA	BB	BB	AA	BB	BB	BB	AA	BB	BB	BB	BB	AA	BB
1_39015171	AA	BB	AB	BB	BB	BB	BB	AA	AA	BB	BB	BB	BB	BB	BB	BB	BB	BB	BB	BB	AA	BB	AB	AA	AB	BB	AA	BB	BB	BB	AA	BB	AA	BB	AB	AA	BB	BB	AA	BB	BB	AA	AA	BB	BB	BB	BB	AA	BB
1_39076196	AA	BB	AB	BB	BB	BB	BB	AA	AA	BB	BB	BB	BB	BB	BB	BB	BB	BB	BB	BB	AA	BB	AB	AA	AB	BB	AA	BB	BB	BB	AA	BB	AA	BB	AB	AA	BB	BB	AA	BB	BB	AA	AA	BB	BB	BB	BB	AA	BB
1_39722633	AA	BB	BB	BB	BB	BB	BB	AA	AA	BB	BB	BB	BB	BB	BB	BB	BB	BB	BB	BB	AA	BB	AB	AA	AB	BB	AA	BB	BB	BB	AA	BB	AA	BB	AA	AA	BB	BB	AA	BB	BB	AA	AA	BB	BB	BB	BB	AA	BB
1_40592514	AA	AA	AA	AA	BB	AA	AA	AA	BB	BB	AA	AA	AA	BB	AA	AA	AA	BB	AA	AA	BB	BB	BB	BB	AA	BB	AA	BB	BB	AA	AA	BB	BB	AA	BB	AA	AA	BB	AA	BB	AA	AA	AA	BB	AA	AA	AA	BB	BB
1_41340346	AA	BB	AA	BB	BB	BB	BB	AA	AA	BB	BB	BB	BB	BB	BB	BB	BB	BB	BB	BB	AA	BB	AB	AA	AB	BB	BB	BB	BB	BB	AA	BB	AB	BB	AB	AA	BB	BB	AA	BB	BB	AA	AA	BB	BB	BB	BB	AA	BB
1_41340355	AA	BB	AA	BB	BB	BB	BB	AA	AA	BB	BB	BB	BB	BB	BB	BB	BB	BB	BB	BB	AA	BB	AB	AA	AB	BB	BB	BB	BB	BB	AA	BB	AB	BB	AB	AA	BB	BB	AA	BB	BB	AA	AA	BB	BB	BB	BB	AA	BB
1_41346520	AA	BB	AB	BB	BB	BB	BB	AA	AA	BB	BB	BB	BB	BB	BB	BB	BB	BB	BB	BB	AA	BB	AB	AA	AB	BB	BB	BB	BB	BB	AA	BB	AB	BB	AA	AA	BB	BB	AA	BB	BB	AA	AA	BB	BB	BB	BB	AA	BB
1_41957279	AA	BB	AB	BB	BB	BB	BB	AA	AA	BB	BB	BB	BB	BB	BB	BB	BB	BB	BB	BB	AA	BB	BB	AA	AB	BB	BB	BB	BB	BB	AA	BB	AB	BB	BB	AA	BB	BB	AA	BB	BB	AA	AA	BB	BB	BB	BB	AA	AA
1_41957285	AA	BB	AB	BB	BB	BB	BB	AA	AA	BB	BB	BB	BB	BB	BB	BB	BB	BB	BB	BB	AA	BB	BB	AA	AB	BB	BB	BB	BB	BB	AA	BB	AB	BB	BB	AA	BB	BB	AA	BB	BB	AA	AA	BB	BB	BB	BB	AA	AA
1_42135473	AA	BB	AB	BB	BB	BB	BB	AA	AA	BB	BB	BB	BB	BB	BB	BB	BB	BB	BB	BB	AA	BB	BB	AA	AB	BB	BB	BB	BB	BB	AA	BB	AB	BB	AB	AA	BB	BB	AA	BB	BB	AA	AA	BB	BB	BB	BB	AA	AA
1_42135496	AA	BB	AB	BB	BB	BB	BB	AA	AA	BB	BB	BB	BB	BB	BB	BB	BB	BB	BB	BB	AA	BB	BB	AA	AB	BB	BB	BB	BB	BB	AA	BB	AB	BB	AB	AA	BB	BB	AA	BB	BB	AA	AA	BB	BB	BB	BB	AA	AA
1_43546254	AA	BB	AB	BB	BB	BB	BB	AA	AA	BB	BB	BB	BB	BB	BB	BB	BB	BB	BB	BB	BB	BB	BB	AA	AB	BB	BB	BB	BB	BB	AA	BB	AB	BB	AB	AA	BB	BB	AA	BB	BB	AA	AA	BB	BB	BB	BB	AA	AA
1_45236213	AA	BB	AB	BB	BB	BB	BB	AA	AA	BB	BB	BB	BB	BB	BB	BB	BB	BB	BB	BB	BB	BB	BB	AA	AB	BB	BB	BB	BB	BB	AA	BB	AB	BB	AB	AA	BB	BB	AA	BB	BB	AA	AA	BB	BB	BB	BB	AA	AA
1_45487674	AA	BB	AB	BB	BB	BB	BB	AA	AA	BB	BB	BB	BB	BB	BB	BB	BB	BB	BB	BB	BB	BB	BB	AA	AB	BB	BB	BB	BB	BB	AA	BB	AB	BB	AA	AA	BB	BB	AA	BB	BB	AA	AA	BB	BB	BB	BB	AA	AA
1_48159608	AA	BB	AA	BB	BB	BB	BB	-	AA	BB	BB	BB	BB	BB	BB	BB	BB	BB	BB	BB	BB	BB	BB	AA	AB	BB	BB	BB	BB	BB	AA	BB	AB	BB	AB	AA	BB	BB	AA	BB	AA	AA	AA	BB	BB	BB	BB	AA	AA
1_48437432	AA	BB	AB	BB	BB	BB	BB	AA	AA	BB	BB	BB	BB	BB	BB	BB	BB	BB	BB	BB	BB	BB	BB	AA	AB	BB	BB	BB	BB	BB	AA	BB	AB	BB	AB	AA	BB	BB	AA	BB	AA	AA	AA	BB	BB	BB	BB	AA	AA
1_48437456	AA	BB	AB	BB	BB	BB	BB	AA	AA	BB	BB	BB	BB	BB	BB	BB	BB	BB	BB	BB	BB	BB	BB	AA	AB	BB	BB	BB	BB	BB	AA	BB	AB	BB	AB	AA	BB	BB	AA	BB	AA	AA	AA	BB	BB	BB	BB	AA	AA
1_48437462	AA	BB	AB	BB	BB	BB	BB	AA	AA	BB	BB	BB	BB	BB	BB	BB	BB	BB	BB	BB	BB	BB	BB	AA	AB	BB	BB	BB	BB	BB	AA	BB	AB	BB	AB	AA	BB	BB	AA	BB	AA	AA	AA	BB	BB	BB	BB	AA	AA
1_48437500	AA	BB	AB	BB	BB	BB	BB	AA	AA	BB	BB	BB	BB	BB	BB	BB	BB	BB	BB	BB	BB	BB	BB	AA	AB	BB	BB	BB	BB	BB	AA	BB	AB	BB	AB	AA	BB	BB	AA	BB	AA	AA	AA	BB	BB	BB	BB	AA	AA
1_49165461	AA	BB	AA	BB	BB	BB	BB	AA	AA	BB	BB	BB	AA	BB	BB	BB	BB	BB	BB	BB	BB	AA	BB	AA	AB	BB	BB	BB	BB	BB	AA	BB	AB	BB	AB	AA	BB	BB	AA	BB	AA	AA	AA	BB	BB	BB	BB	AA	AA
1_49672898	AA	BB	AA	BB	BB	BB	BB	AA	AA	BB	BB	BB	AA	BB	BB	BB	BB	BB	BB	BB	BB	AA	BB	AA	AB	BB	BB	BB	BB	BB	AA	BB	AB	BB	AB	AA	BB	BB	AA	BB	AA	AA	AA	BB	BB	BB	BB	AA	AA
1_50167605	AA	BB	AA	BB	BB	BB	BB	AA	AA	BB	BB	BB	AA	BB	BB	BB	BB	BB	BB	BB	BB	AA	BB	AA	AB	BB	BB	BB	BB	BB	AA	BB	AB	BB	AB	AA	BB	BB	AA	BB	AA	AA	AA	-	BB	BB	BB	AA	AA
1_50734059	AA	BB	AB	BB	BB	BB	BB	AA	AA	BB	BB	BB	BB	BB	BB	BB	BB	BB	BB	BB	BB	BB	BB	AA	AB	BB	BB	BB	BB	BB	AA	BB	AB	BB	AB	AA	BB	BB	AA	BB	AA	AA	AA	BB	BB	BB	BB	AA	AA
1_51124867	AA	BB	AA	BB	BB	BB	BB	AA	AB	BB	BB	BB	AA	BB	BB	BB	BB	BB	BB	BB	BB	AA	BB	AA	AB	BB	BB	BB	BB	BB	AA	BB	AB	BB	AA	AA	BB	BB	AA	BB	AA	AA	AA	BB	BB	BB	BB	AA	AA
1_51195208	AA	BB	AA	BB	BB	BB	BB	AA	AA	BB	BB	BB	AA	BB	BB	BB	BB	BB	BB	BB	BB	AA	BB	AA	AB	BB	BB	BB	BB	BB	AA	BB	AB	BB	AA	AA	BB	BB	AA	BB	AA	AA	AA	BB	BB	BB	BB	AA	AA
1_51195217	AA	BB	AA	BB	BB	BB	BB	AA	AA	BB	BB	BB	AA	BB	BB	BB	BB	BB	BB	BB	BB	AA	BB	AA	AB	BB	BB	BB	BB	BB	AA	BB	AB	BB	AA	AA	BB	BB	AA	BB	AA	AA	AA	BB	BB	BB	BB	AA	AA
1_52459529	AA	BB	AA	BB	BB	BB	BB	AA	AA	BB	BB	AA	AA	BB	BB	BB	BB	BB	BB	BB	BB	AA	BB	AA	AB	BB	BB	BB	BB	BB	AA	BB	AB	BB	AB	AA	BB	BB	AA	BB	AA	AA	AA	BB	BB	BB	BB	AA	AA
1_52459572	AA	BB	AA	BB	BB	BB	BB	AA	AA	BB	BB	AA	AA	BB	BB	BB	BB	BB	BB	BB	BB	AA	BB	AA	AB	BB	BB	BB	BB	BB	AA	BB	AB	BB	AB	AA	BB	BB	AA	BB	AA	AA	AA	BB	BB	BB	BB	AA	AA
1_54848162	AA	BB	AA	BB	BB	BB	BB	AA	AA	BB	BB	AA	AA	BB	BB	BB	BB	BB	BB	BB	BB	AA	BB	AA	BB	BB	BB	BB	BB	BB	AA	BB	AB	BB	AB	AA	BB	BB	AA	BB	AA	AA	AA	BB	BB	BB	BB	AA	AA
1_54848705	AA	BB	AA	BB	BB	BB	BB	AA	AA	BB	BB	AA	AA	BB	BB	BB	BB	BB	BB	BB	BB	AA	BB	AA	BB	BB	BB	BB	BB	BB	AA	BB	AB	BB	AB	AA	BB	BB	AA	BB	AA	AA	AA	BB	BB	BB	BB	AA	AA
1_55098018	AA	BB	AA	BB	BB	BB	BB	AA	AA	BB	BB	AA	AA	BB	BB	BB	BB	BB	BB	BB	BB	AA	BB	AA	BB	BB	BB	BB	BB	BB	AA	BB	AB	BB	AA	AA	BB	BB	AA	BB	AA	AA	AA	BB	BB	BB	BB	AA	AA
1_57180090	AA	BB	AA	BB	BB	BB	BB	AA	AA	BB	BB	AA	AA	BB	BB	BB	BB	BB	BB	BB	BB	AA	BB	AA	BB	BB	BB	BB	BB	BB	AA	BB	AB	AA	AA	AA	BB	BB	AA	BB	AA	AA	AA	BB	BB	BB	BB	AA	AA
1_57435199	AA	BB	AA	BB	BB	BB	BB	AA	AA	BB	BB	AA	AA	BB	BB	BB	BB	BB	BB	BB	BB	AA	BB	AA	BB	BB	BB	BB	BB	BB	AA	BB	AB	AA	AB	AA	BB	BB	AA	BB	AA	AA	AA	BB	BB	BB	BB	AA	AA
1_57491026	AA	BB	AA	BB	BB	BB	BB	AA	AA	BB	BB	AA	AA	BB	BB	AB	BB	BB	BB	BB	BB	AA	BB	AA	BB	BB	BB	BB	BB	BB	AA	BB	AB	AA	AB	AA	BB	BB	AA	BB	AA	AA	AA	BB	BB	BB	BB	AA	AA
1_57491062	AA	BB	AA	BB	BB	BB	BB	AA	AA	BB	BB	AA	AA	BB	BB	AB	BB	BB	BB	BB	BB	AA	BB	AA	BB	BB	BB	BB	BB	BB	AA	BB	AB	AA	AB	AA	BB	BB	AA	BB	AA	AA	AA	BB	BB	BB	BB	AA	AA
1_57725897	AA	BB	AA	BB	BB	BB	BB	-	AA	BB	BB	AA	AA	BB	BB	BB	BB	BB	BB	BB	BB	AA	BB	-	BB	BB	BB	BB	BB	BB	AA	BB	AB	BB	AA	AA	BB	BB	AA	BB	AA	AA	AA	BB	BB	BB	BB	AA	AA
1_59916806	AA	BB	AA	BB	BB	BB	BB	AA	AA	BB	BB	AA	AA	BB	BB	BB	BB	BB	BB	BB	BB	AA	BB	AA	BB	BB	BB	BB	BB	BB	AA	BB	AB	AA	AB	AA	BB	BB	AA	BB	AA	AA	AA	BB	BB	BB	BB	AA	AA
1_59972933	AA	BB	AA	BB	BB	BB	BB	AA	AA	BB	BB	AA	AA	BB	BB	BB	BB	BB	BB	BB	BB	AA	BB	AA	BB	BB	BB	AB	BB	BB	AA	BB	AB	AA	AB	AA	BB	BB	AA	BB	AA	AA	AA	BB	BB	BB	BB	AA	AA
1_59998680	AA	BB	AA	BB	BB	BB	BB	AA	AA	BB	BB	AA	AA	BB	BB	BB	BB	BB	BB	BB	BB	AA	BB	AA	BB	BB	BB	AB	BB	BB	AA	BB	AB	AA	AB	AA	AA	BB	AA	BB	AA	AA	AA	BB	BB	BB	BB	AA	AA
1_59998703	AA	BB	AA	BB	BB	BB	BB	AA	AA	BB	BB	AA	AA	BB	BB	BB	BB	BB	BB	BB	BB	AA	BB	AA	BB	BB	BB	AB	BB	BB	AA	BB	AB	AA	AB	AA	AA	BB	AA	BB	AA	AA	AA	BB	BB	BB	BB	AA	AA
1_59998750	AA	BB	AA	BB	BB	BB	BB	AA	AA	BB	BB	AA	AA	BB	BB	BB	BB	BB	BB	BB	BB	AA	BB	AA	BB	BB	BB	AB	BB	BB	AA	BB	AB	AA	AB	AA	AA	BB	AA	BB	AA	AA	AA	BB	BB	BB	BB	AA	AA
1_61428885	AA	BB	AA	BB	BB	BB	BB	AA	AA	BB	BB	AA	AA	BB	BB	BB	BB	BB	BB	BB	BB	AA	BB	AA	BB	BB	BB	AB	BB	BB	AA	AB	AB	AA	AB	AA	AA	BB	AA	BB	AA	AA	AA	BB	BB	BB	BB	AA	AA
1_61429098	AA	BB	AA	BB	BB	BB	BB	AA	AA	BB	BB	AA	AA	BB	BB	BB	BB	BB	BB	BB	BB	AA	BB	AA	BB	BB	BB	AB	BB	BB	AA	AB	AB	AA	AA	AA	AA	BB	AA	BB	AA	AA	AA	BB	BB	BB	BB	AA	-
1_65107537	AA	BB	-	BB	BB	BB	BB	AA	AA	BB	-	AA	AA	BB	BB	BB	BB	BB	BB	BB	BB	AA	BB	AA	BB	BB	BB	AB	BB	BB	AA	AA	AB	AA	AA	AA	AA	BB	AA	BB	AA	AA	AA	BB	BB	-	BB	AA	AA
1_65107538	AA	BB	-	BB	BB	BB	BB	AA	AA	BB	-	AA	AA	BB	BB	BB	BB	BB	BB	BB	BB	AA	BB	AA	BB	BB	BB	AB	BB	BB	AA	AA	AB	AA	AA	AA	AA	BB	AA	BB	AA	AA	AA	BB	BB	-	BB	AA	AA
1_65133336	AA	BB	AA	BB	BB	BB	BB	AA	AA	BB	BB	AA	AA	BB	BB	BB	BB	BB	BB	BB	BB	AA	BB	AA	BB	BB	BB	AB	BB	BB	AA	AA	AB	AA	AB	AA	AA	BB	AA	BB	AA	AA	AA	BB	BB	BB	BB	AA	AA
1_65735695	AA	BB	AA	BB	BB	BB	BB	AA	AA	BB	BB	AA	AA	BB	BB	BB	BB	BB	BB	BB	BB	AA	BB	AA	BB	BB	BB	AB	BB	BB	AA	AA	AB	AA	AB	AA	AA	BB	AA	BB	AA	AA	AA	BB	BB	BB	BB	AA	AA
1_65875947	AA	BB	AA	BB	BB	BB	BB	AA	AA	BB	BB	AA	AA	BB	BB	BB	BB	BB	BB	BB	BB	AA	BB	AA	BB	BB	BB	AB	BB	BB	AA	AA	AB	AA	AB	AA	AA	BB	AA	BB	AA	AA	AA	BB	BB	BB	BB	AA	AA
1_68011547	AA	BB	AA	BB	BB	BB	BB	AA	-	BB	BB	AA	AA	BB	BB	BB	BB	BB	BB	BB	BB	AA	BB	AA	BB	BB	BB	AB	BB	BB	AA	AA	AB	AA	BB	AA	AA	BB	AA	BB	AA	AA	AA	BB	BB	BB	BB	AA	AA
1_68455539	AA	BB	AA	BB	BB	BB	BB	AA	AA	BB	BB	AA	AA	BB	BB	BB	BB	BB	BB	BB	-	AA	BB	AA	BB	BB	BB	AB	BB	BB	AA	AA	AB	AA	AB	AA	AA	BB	AA	BB	AA	AA	AA	BB	BB	BB	BB	AA	AA
1_68867818	AA	BB	AA	BB	BB	BB	BB	AA	AA	BB	BB	AA	AA	BB	BB	BB	BB	BB	BB	BB	BB	AA	BB	AA	BB	BB	BB	BB	BB	BB	AA	AA	BB	AA	BB	AA	AA	BB	AA	BB	AA	AA	AA	BB	BB	BB	BB	AA	AA
1_69829901	AA	BB	AA	BB	BB	BB	BB	AA	AA	BB	BB	AA	AA	BB	BB	BB	BB	BB	BB	BB	BB	AA	BB	AA	BB	BB	BB	AB	BB	BB	AA	AA	AB	AA	AB	AA	AA	BB	AA	BB	AA	AA	AA	BB	BB	BB	BB	AA	AA
1_69830285	AA	BB	AA	BB	BB	BB	BB	AA	AA	BB	BB	AA	AA	BB	BB	BB	BB	BB	BB	BB	BB	AA	BB	AA	BB	BB	BB	AB	BB	BB	AA	AA	AB	AA	AB	AA	AA	BB	AA	BB	AA	AA	AA	BB	BB	BB	BB	AA	AA
1_71970718	AA	BB	AA	BB	BB	BB	BB	AA	AA	BB	BB	AA	AA	BB	BB	BB	BB	BB	BB	BB	BB	AA	BB	AA	BB	BB	BB	AB	BB	BB	AA	AA	AB	AA	AB	AA	AA	BB	AA	BB	AA	AA	AA	BB	BB	BB	BB	AA	AA
1_79877029	AA	BB	AA	BB	BB	AA	BB	AA	AA	BB	BB	AA	AA	BB	BB	BB	BB	BB	BB	BB	BB	AA	BB	AA	BB	BB	BB	AB	BB	BB	AA	AA	AA	AA	BB	AA	AA	BB	AA	BB	AA	AA	AA	AA	AA	BB	BB	BB	AA
1_79946604	AA	BB	AA	BB	BB	AA	BB	AA	AA	BB	BB	AA	AA	BB	BB	BB	BB	BB	BB	BB	BB	AA	BB	AA	BB	BB	BB	AB	BB	BB	AA	AA	AA	AA	BB	AA	AA	BB	AA	BB	AA	AA	AA	AA	AA	BB	BB	BB	AA
1_79946610	AA	BB	AA	BB	BB	AA	BB	AA	AA	BB	BB	AA	AA	BB	BB	BB	BB	BB	BB	BB	BB	AA	BB	AA	BB	BB	BB	AB	BB	BB	AA	AA	AA	AA	BB	AA	AA	BB	AA	BB	AA	AA	AA	AA	AA	BB	BB	BB	AA
1_79946617	AA	BB	AA	BB	BB	AA	BB	AA	AA	BB	BB	AA	AA	BB	BB	BB	BB	BB	BB	BB	BB	AA	BB	AA	BB	BB	BB	AB	BB	BB	AA	AA	AA	AA	BB	AA	AA	BB	AA	BB	AA	AA	AA	AA	AA	BB	BB	BB	AA
1_79946621	AA	BB	AA	BB	BB	AA	BB	AA	AA	BB	BB	AA	AA	BB	BB	BB	BB	BB	BB	BB	BB	AA	BB	AA	BB	BB	BB	AB	BB	BB	AA	AA	AA	AA	BB	AA	AA	BB	AA	BB	AA	AA	AA	AA	AA	BB	BB	BB	AA
1_80103524	AA	BB	AA	BB	BB	AA	BB	AA	AA	BB	BB	AA	AA	BB	BB	BB	BB	BB	BB	BB	BB	AA	BB	AA	BB	BB	BB	AB	BB	BB	AA	AA	AA	AA	BB	AA	AA	BB	AA	BB	AA	AA	AA	AA	AA	BB	BB	BB	AA
1_80197435	AA	BB	AA	BB	BB	AA	BB	AA	AA	BB	BB	AA	AA	BB	BB	BB	BB	BB	BB	BB	BB	AA	BB	AA	BB	BB	BB	AB	BB	BB	AA	AA	AA	AA	BB	AA	AA	BB	AA	BB	AA	AA	AA	AA	AA	BB	BB	BB	AA
1_80674694	AA	BB	AA	BB	BB	AA	BB	AA	AA	BB	BB	AA	AA	BB	BB	BB	BB	BB	BB	BB	BB	AA	BB	AA	BB	BB	BB	AB	BB	BB	AA	AA	AA	AA	BB	AA	AA	BB	AA	BB	AA	AA	AA	AA	AA	BB	BB	BB	-
1_80674703	AA	BB	AA	BB	BB	AA	BB	AA	AA	BB	BB	AA	AA	BB	BB	BB	BB	BB	BB	BB	BB	AA	BB	AA	BB	BB	BB	AB	BB	BB	AA	AA	AA	AA	BB	AA	AA	BB	AA	BB	AA	AA	AA	AA	AA	BB	BB	BB	-
1_84918675	AA	BB	AA	BB	BB	AA	BB	AA	AA	BB	BB	AA	AA	BB	BB	BB	BB	BB	BB	BB	BB	AA	BB	AA	BB	BB	BB	AB	BB	BB	AA	AA	AA	AA	BB	AA	AA	BB	AA	BB	AA	AA	AA	AA	AA	BB	BB	BB	BB
1_94115386	AA	BB	AA	AA	BB	AA	BB	AA	AA	BB	BB	AA	AA	BB	BB	BB	AA	AB	BB	BB	BB	AA	BB	AA	BB	BB	BB	AB	BB	BB	AA	AA	BB	AA	BB	AA	AA	BB	AA	BB	AA	AA	AA	AA	AA	AA	BB	BB	BB
1_94196670	AA	BB	AA	AA	BB	AA	BB	AA	AA	BB	BB	AA	AA	BB	BB	BB	AA	AB	BB	BB	BB	AA	BB	AA	BB	BB	BB	AB	BB	BB	AA	AA	BB	AA	BB	AA	AA	BB	AA	BB	AA	AA	AA	AA	AA	AA	BB	BB	BB
1_94774812	AA	BB	AA	AA	BB	AA	BB	AA	AA	BB	BB	AA	AA	BB	BB	BB	AA	AB	AA	BB	BB	AA	BB	AA	BB	BB	BB	AB	BB	BB	AA	AA	BB	AA	BB	AA	AA	BB	AA	BB	AA	AA	AA	AA	AA	AA	BB	BB	BB
1_101114843	AA	BB	AA	AA	BB	AA	AA	AA	AA	BB	BB	AA	AA	BB	BB	BB	AA	BB	AA	BB	BB	BB	BB	AA	BB	BB	BB	AB	BB	BB	AA	AA	BB	AA	BB	AA	AA	BB	AA	BB	AA	AA	AA	AA	AA	AA	BB	BB	BB
1_104237502	AA	BB	AA	AA	BB	AA	AA	AA	AA	BB	BB	AA	BB	BB	BB	BB	AA	BB	AA	BB	BB	BB	BB	AA	BB	BB	BB	AB	BB	BB	AA	AA	BB	AA	BB	AA	AA	BB	AA	BB	AA	AA	AA	AA	AA	AA	AA	BB	BB
1_104237503	AA	BB	AA	AA	BB	AA	AA	AA	AA	BB	BB	AA	BB	BB	BB	BB	AA	BB	AA	BB	BB	BB	BB	AA	BB	BB	BB	AB	BB	BB	AA	AA	BB	AA	BB	AA	AA	BB	AA	BB	AA	AA	AA	AA	AA	AA	AA	BB	BB
1_104945538	AA	BB	AA	AA	BB	AA	AA	AA	AA	BB	BB	AA	BB	BB	BB	BB	AA	BB	AA	BB	BB	BB	BB	AA	BB	BB	BB	AB	BB	BB	AA	AA	BB	AA	BB	AA	AA	BB	AA	BB	AA	AA	AA	AA	AA	AA	AA	BB	BB
1_105897130	AA	BB	AA	AA	BB	AA	AA	AA	AA	BB	BB	AA	BB	BB	BB	BB	AA	BB	AA	BB	BB	BB	BB	AA	BB	BB	BB	AB	BB	AA	AA	AA	BB	AA	BB	AA	AA	BB	AA	BB	AA	AA	AA	AA	AA	AA	AA	BB	BB
1_106621544	AA	BB	AA	AA	BB	AA	AA	AA	AA	BB	BB	AA	BB	BB	BB	BB	AA	BB	AA	BB	BB	BB	BB	AA	BB	BB	BB	AB	BB	AA	AA	AA	BB	AA	BB	AA	AA	BB	AA	BB	AA	AA	AA	AA	AA	AA	AA	BB	BB
1_113946075	AA	BB	AA	AA	BB	AA	AA	AA	AA	BB	BB	AA	BB	BB	BB	AA	AA	BB	AA	BB	BB	BB	BB	AA	BB	BB	BB	BB	BB	AA	AA	AA	BB	AA	BB	AA	AA	BB	AA	BB	AA	AA	AA	AA	AA	AA	AA	BB	BB
1_113946082	AA	BB	AA	AA	BB	AA	AA	AA	AA	BB	BB	AA	BB	BB	BB	AA	AA	BB	AA	BB	BB	BB	BB	AA	BB	BB	BB	BB	BB	AA	AA	AA	BB	AA	BB	AA	AA	BB	AA	BB	AA	AA	AA	AA	AA	AA	AA	BB	BB
1_113946109	AA	BB	AA	AA	BB	AA	AA	AA	AA	BB	BB	AA	BB	BB	BB	AA	AA	BB	AA	BB	BB	BB	BB	AA	BB	BB	BB	BB	BB	AA	AA	AA	BB	AA	BB	AA	AA	BB	AA	BB	AA	AA	AA	AA	AA	AA	AA	BB	BB
1_113946120	AA	BB	AA	AA	BB	AA	AA	AA	AA	BB	BB	AA	BB	BB	BB	AA	AA	BB	AA	BB	BB	BB	BB	AA	BB	BB	BB	BB	BB	AA	AA	AA	BB	AA	BB	AA	AA	BB	AA	BB	AA	AA	AA	AA	AA	AA	AA	BB	BB
1_117001117	AA	BB	AA	AA	BB	AA	AA	AA	AA	BB	BB	AA	BB	AB	BB	AA	AA	BB	AA	BB	BB	BB	AA	AA	BB	BB	BB	BB	BB	AA	AA	AA	BB	AA	BB	AA	AA	BB	AA	BB	AA	AA	AA	AA	AA	AA	AA	BB	BB
1_117799973	AA	BB	AA	AA	BB	AA	AA	AA	AA	BB	BB	AA	BB	AB	BB	AA	AA	BB	AA	BB	BB	BB	AA	AA	BB	BB	BB	BB	BB	AA	AA	AA	BB	AA	BB	AA	AA	BB	AA	BB	AA	AA	AA	AA	AA	AA	AA	BB	BB
1_119821177	AA	BB	AA	AA	BB	AA	AA	AA	AA	BB	BB	AA	BB	AB	BB	AA	AA	BB	AA	BB	BB	BB	AA	AA	BB	BB	AA	BB	BB	AA	AA	AA	BB	AA	BB	AA	AA	BB	AA	BB	AA	AA	AA	AA	AA	AA	AA	BB	BB
1_122882419	AA	BB	AA	AA	BB	AA	AA	AA	AA	BB	BB	AA	BB	AB	BB	AA	AA	BB	AA	BB	BB	BB	AA	AA	BB	BB	AA	BB	BB	AA	AA	AA	BB	AA	BB	AA	AA	BB	AA	BB	AA	AA	AA	AA	AA	AA	AA	BB	BB
1_123263229	-	BB	BB	AB	BB	AB	AA	AB	BB	BB	BB	AB	BB	BB	BB	AB	AB	BB	AB	BB	BB	BB	AB	AB	BB	BB	-	BB	BB	AB	AB	AB	BB	AB	BB	AB	BB	BB	AB	BB	AA	-	AA	AA	AA	AB	AA	BB	BB
1_123263240	-	BB	BB	AB	BB	AB	AA	AB	BB	BB	BB	AB	BB	BB	BB	AB	AB	BB	AB	BB	BB	BB	AB	AB	BB	BB	-	BB	BB	AB	AB	AB	BB	AB	BB	AB	BB	BB	AB	BB	AA	-	AA	AA	AA	AB	AA	BB	BB
1_123271047	AA	BB	AA	AA	BB	AA	AA	AA	AA	BB	BB	AA	BB	AB	BB	AA	AA	BB	AA	BB	BB	BB	AA	AA	BB	BB	AA	BB	BB	AA	AA	AA	BB	AA	BB	AA	AA	BB	AA	BB	AA	AA	AA	AA	AA	AA	AA	BB	BB
1_124055492	AA	BB	AA	AA	BB	AA	AA	AA	AA	BB	BB	AA	BB	AB	BB	AA	AA	BB	AA	BB	BB	BB	AA	AA	BB	BB	AA	BB	BB	AA	AA	AA	BB	AA	BB	AA	AA	BB	AA	BB	AA	AA	AA	AA	AA	AA	AA	BB	BB
1_124745122	AA	BB	AA	AA	BB	AA	AA	AA	AA	BB	BB	AA	BB	AB	BB	AA	AA	BB	AA	BB	BB	BB	AA	AA	BB	BB	AA	BB	BB	AA	AA	AA	BB	AA	BB	AA	AA	BB	AA	BB	AA	AA	AA	AA	AA	AA	AA	BB	BB
1_124745153	AA	BB	AA	AA	BB	AA	AA	AA	AA	BB	BB	AA	BB	AB	BB	AA	AA	BB	AA	BB	BB	BB	AA	AA	BB	BB	AA	BB	BB	AA	AA	AA	BB	AA	BB	AA	AA	BB	AA	BB	AA	AA	AA	AA	AA	AA	AA	BB	BB
1_124745167	AA	BB	AA	AA	BB	AA	AA	AA	AA	BB	BB	AA	BB	AB	BB	AA	AA	BB	AA	BB	BB	BB	AA	AA	BB	BB	AA	BB	BB	AA	AA	AA	BB	AA	BB	AA	AA	BB	AA	BB	AA	AA	AA	AA	AA	AA	AA	BB	BB
1_124745209	AA	BB	AA	AA	BB	AA	AA	AA	AA	BB	BB	AA	BB	AB	BB	AA	AA	BB	AA	BB	BB	BB	AA	AA	BB	BB	AA	BB	BB	AA	AA	AA	BB	AA	BB	AA	AA	BB	AA	BB	AA	AA	AA	AA	AA	AA	AA	BB	BB
1_125313976	AA	BB	AA	AA	BB	AA	AA	AA	AA	BB	BB	AA	BB	AB	BB	AA	AA	BB	AA	BB	BB	BB	AA	AA	BB	BB	AA	BB	BB	AA	AA	AA	BB	AA	BB	AA	AA	BB	AA	BB	AA	AA	AA	AA	AA	AA	AA	BB	BB
1_130605976	AA	BB	AA	AA	BB	AA	AA	AA	AA	BB	BB	AA	BB	BB	BB	AA	AA	BB	AA	BB	BB	BB	AA	AA	BB	BB	AA	BB	BB	AA	AA	AB	BB	AA	BB	AA	AA	BB	AA	BB	AA	AA	AA	AA	AA	AA	AA	BB	BB
1_132560122	AA	BB	AA	AA	BB	AA	AA	AA	AA	BB	BB	AA	BB	BB	BB	AA	AA	BB	AA	BB	BB	BB	AA	AA	AA	BB	AA	BB	BB	AA	AA	AB	BB	AA	BB	AA	AA	BB	AA	BB	AA	AA	AA	AA	AA	AA	AA	BB	BB
1_132560146	AA	BB	AA	AA	BB	AA	AA	AA	AA	BB	BB	AA	BB	BB	BB	AA	AA	BB	AA	BB	BB	BB	AA	AA	AA	BB	AA	BB	BB	AA	AA	AB	BB	AA	BB	AA	AA	BB	AA	BB	AA	AA	AA	AA	AA	AA	AA	BB	BB
1_132560160	AA	BB	AA	AA	BB	AA	AA	AA	AA	BB	BB	AA	BB	BB	BB	AA	AA	BB	AA	BB	BB	BB	AA	AA	AA	BB	AA	BB	BB	AA	AA	AB	BB	AA	BB	AA	AA	BB	AA	BB	AA	AA	AA	AA	AA	AA	AA	BB	BB
1_132560170	AA	BB	AA	AA	BB	AA	AA	AA	AA	BB	BB	AA	BB	BB	BB	AA	AA	BB	AA	BB	BB	BB	AA	AA	AA	BB	AA	BB	BB	AA	AA	AB	BB	AA	BB	AA	AA	BB	AA	BB	AA	AA	AA	AA	AA	AA	AA	BB	BB
1_132560199	AA	BB	AA	AA	BB	AA	AA	AA	AA	BB	BB	AA	BB	BB	BB	AA	AA	BB	AA	BB	BB	BB	AA	AA	AA	BB	AA	BB	BB	AA	AA	AB	BB	AA	BB	AA	AA	BB	AA	BB	AA	AA	AA	AA	AA	AA	AA	BB	BB
1_132560204	AA	BB	AA	AA	BB	AA	AA	AA	AA	BB	BB	AA	BB	BB	BB	AA	AA	BB	AA	BB	BB	BB	AA	AA	AA	BB	AA	BB	BB	AA	AA	AB	BB	AA	BB	AA	AA	BB	AA	BB	AA	AA	AA	AA	AA	AA	AA	BB	BB
1_133501494	AA	BB	AA	AA	BB	AA	AA	AA	AA	BB	BB	AA	BB	BB	BB	AA	AA	BB	AA	BB	BB	BB	AA	AA	AA	BB	AA	BB	BB	AA	AA	AB	BB	AA	BB	AA	AA	BB	AA	BB	AA	AA	AA	AA	AB	AA	AA	BB	BB
1_133501545	AA	BB	AA	AA	BB	AA	AA	AA	AA	BB	BB	AA	BB	BB	BB	AA	AA	BB	AA	BB	BB	BB	AA	AA	AA	BB	AA	BB	BB	AA	AA	AB	BB	AA	BB	AA	AA	BB	AA	BB	AA	AA	AA	AA	AA	AA	AA	BB	BB
1_133501560	AA	BB	AA	AA	BB	AA	AA	AA	AA	BB	BB	AA	BB	BB	BB	AA	AA	BB	AA	BB	BB	BB	AA	AA	AA	BB	AA	BB	BB	AA	AA	AB	BB	AA	BB	AA	AA	BB	AA	BB	AA	AA	AA	AA	AA	AA	AA	BB	BB
1_135040527	AA	AA	AA	AA	BB	AA	AA	AA	AA	BB	AB	AA	BB	BB	BB	AA	AA	BB	AA	BB	BB	BB	AA	AA	AA	BB	AA	BB	BB	AA	AA	BB	BB	AA	BB	AA	AA	BB	AA	BB	AA	AA	AA	AA	AA	AA	AA	BB	BB
1_136034039	AA	AA	AA	AA	BB	AA	AA	AA	AA	BB	AB	AA	BB	BB	BB	AA	AA	BB	AA	BB	BB	BB	AA	AA	AA	BB	AA	BB	BB	AA	AA	BB	BB	AA	BB	AA	AA	-	AA	BB	AA	AA	AA	AA	AA	AA	AA	BB	BB
1_136034045	AA	AA	AA	AA	BB	AA	AA	AA	AA	BB	AB	AA	BB	BB	BB	AA	AA	BB	AA	BB	BB	BB	AA	AA	AA	BB	AA	BB	BB	AA	AA	BB	BB	AA	BB	AA	AA	-	AA	BB	AA	AA	AA	AA	AA	AA	AA	BB	BB
1_136034120	AA	AA	AA	AA	BB	AA	AA	AA	AA	BB	AB	AA	BB	BB	BB	AA	AA	BB	AA	BB	BB	BB	AA	AA	AA	BB	AA	BB	BB	AA	AA	BB	BB	AA	BB	AA	AA	BB	AA	BB	AA	AA	AA	AA	AA	AA	AA	BB	BB
1_138438582	AA	AA	AA	AA	BB	AA	AA	AA	BB	BB	AB	AA	BB	BB	BB	AA	AA	BB	AA	BB	BB	BB	AA	AA	AA	BB	AA	BB	BB	AA	AA	BB	BB	AA	BB	AA	AA	BB	AA	BB	AA	AA	AA	-	AA	AA	AA	BB	BB
1_140685345	AA	AA	AA	AA	BB	AA	AA	AA	BB	BB	AB	AA	BB	BB	BB	AA	AA	BB	BB	BB	BB	BB	AA	AA	AA	BB	AA	BB	BB	AA	AA	BB	BB	AA	BB	AA	AA	BB	AA	BB	AA	AA	AA	AA	AA	AA	AA	BB	BB
1_142807184	AA	AA	AA	AA	BB	AA	AA	AA	BB	BB	AB	AA	BB	BB	BB	AA	AA	BB	BB	BB	BB	BB	AA	AA	AA	BB	AA	BB	BB	AA	AA	BB	BB	AA	BB	AA	AA	BB	AA	BB	AA	AA	AA	AA	AA	AA	AA	BB	BB
1_142891282	AA	AA	AA	AA	BB	AA	AA	AB	BB	BB	BB	AA	BB	BB	BB	AA	AA	BB	BB	BB	BB	BB	AA	AA	AA	BB	AA	BB	BB	AA	AA	BB	BB	AA	BB	AA	AA	BB	AA	BB	AA	AA	AA	AA	AA	AA	AA	BB	BB
1_145441772	AA	AA	AA	AA	BB	AA	AA	AA	BB	BB	AB	AA	AB	BB	BB	AA	AA	BB	BB	BB	BB	BB	AA	AA	AA	BB	AA	BB	BB	AA	AA	BB	BB	AA	BB	AA	AA	BB	AA	BB	AA	AA	AA	AA	AA	AA	AA	BB	BB
1_148395929	AA	AA	AA	AA	BB	AA	AA	AA	BB	BB	AA	AA	AB	BB	BB	AA	AA	BB	BB	BB	BB	BB	AA	AA	AA	BB	AA	BB	BB	AA	AA	BB	BB	AA	BB	AA	AA	BB	AA	BB	AA	AA	AA	BB	AA	AA	AA	BB	BB
1_148395932	AA	AA	AA	AA	BB	AA	AA	AA	BB	BB	AA	AA	AB	BB	BB	AA	AA	BB	BB	BB	BB	BB	AA	AA	AA	BB	AA	BB	BB	AA	AA	BB	BB	AA	BB	AA	AA	BB	AA	BB	AA	AA	AA	BB	AA	AA	AA	BB	BB
1_150091816	AA	AA	AA	AA	BB	AA	AA	AA	BB	BB	AA	AA	AB	BB	BB	AA	AA	BB	BB	BB	BB	BB	AA	AA	AA	BB	AA	BB	BB	AA	AA	BB	BB	AA	BB	AA	AA	BB	AA	BB	AA	AA	AA	BB	AA	AA	AA	BB	BB
1_150091894	AA	AA	AA	AA	BB	AA	AA	AA	BB	BB	AA	AA	AB	BB	BB	AA	AA	BB	BB	BB	BB	BB	AA	AA	AA	BB	AA	BB	BB	AA	AA	BB	BB	AA	BB	AA	AA	BB	AA	BB	AA	AA	AA	BB	AA	AA	AA	BB	BB
1_150097158	AA	AA	AA	AA	BB	AA	AA	AA	BB	BB	AA	AA	AB	BB	BB	AA	AA	BB	BB	BB	BB	BB	AA	AA	AA	BB	AA	BB	BB	AA	AA	BB	BB	AA	BB	AA	AA	BB	AA	BB	AA	AA	AA	BB	AA	AA	AA	BB	BB
1_150097204	AA	AA	AA	AA	BB	AA	AA	AA	BB	BB	AA	AA	AB	BB	BB	AA	AA	BB	BB	BB	BB	BB	AA	AA	AA	BB	AA	BB	BB	AA	AA	BB	BB	AA	BB	AA	AA	BB	AA	BB	AA	AA	AA	BB	AA	AA	AA	BB	BB
1_150097207	AA	AA	AA	AA	BB	AA	AA	AA	BB	BB	AA	AA	AB	BB	BB	AA	AA	BB	BB	BB	BB	BB	AA	AA	AA	BB	AA	BB	BB	AA	AA	BB	BB	AA	BB	AA	AA	BB	AA	BB	AA	AA	AA	BB	AA	AA	AA	BB	BB
1_150097225	AA	AA	AA	AA	BB	AA	AA	AA	BB	BB	AA	AA	AB	BB	BB	AA	AA	BB	BB	BB	BB	BB	AA	AA	AA	BB	AA	BB	BB	AA	AA	BB	BB	AA	BB	AA	AA	BB	AA	BB	AA	AA	AA	BB	AA	AA	AA	BB	BB
1_150410892	AA	AA	AA	AA	BB	AA	AA	AA	BB	BB	AA	AA	AB	BB	BB	AA	AA	BB	BB	BB	BB	BB	AA	AA	AA	BB	AA	BB	BB	AA	AA	BB	BB	AA	BB	AA	AA	BB	AA	BB	AA	AA	AA	BB	AA	AA	AA	BB	BB
1_150781449	AA	AA	AA	AA	-	AA	AA	AA	BB	BB	AA	AA	AB	BB	BB	AA	AA	BB	BB	BB	BB	BB	AA	AA	AA	BB	AA	BB	BB	AA	AA	BB	BB	AA	-	AA	AA	BB	AA	BB	AA	AA	AA	BB	AA	AA	AA	BB	BB
1_152527290	AA	AA	AA	AA	BB	AA	AA	AA	BB	BB	AA	AA	AB	BB	BB	AA	AA	BB	BB	BB	BB	BB	AA	AA	AA	BB	AA	BB	BB	AA	AA	BB	BB	AA	BB	AA	AA	BB	AA	BB	AA	AA	AA	BB	AA	AA	AA	BB	BB
1_152527299	AA	AA	AA	AA	BB	AA	AA	AA	BB	BB	AA	AA	AB	BB	BB	AA	AA	BB	BB	BB	BB	BB	AA	AA	AA	BB	AA	BB	BB	AA	AA	BB	BB	AA	BB	AA	AA	BB	AA	BB	AA	AA	AA	BB	AA	AA	AA	BB	BB
1_152527308	AA	AA	AA	AA	BB	AA	AA	AA	BB	BB	AA	AA	AB	BB	BB	AA	AA	BB	BB	BB	BB	BB	AA	AA	AA	BB	AA	BB	BB	AA	AA	BB	BB	AA	BB	AA	AA	BB	AA	BB	AA	AA	AA	BB	AA	AA	AA	BB	BB
1_155007786	AA	AA	AA	AA	BB	AA	AA	AA	BB	BB	AA	AA	AB	BB	BB	AA	AA	BB	BB	AA	BB	BB	AA	AA	AA	BB	AA	BB	BB	AA	AA	BB	BB	AA	BB	AA	AA	BB	AA	BB	AA	AA	AA	BB	AA	AA	AA	BB	BB
1_156738057	AA	AA	AA	AA	BB	AA	AA	AA	BB	BB	AA	AA	AA	BB	AA	AA	AA	BB	BB	AA	BB	BB	AA	AA	AA	BB	AA	BB	BB	AA	AA	BB	BB	AA	BB	AA	AA	BB	AA	BB	AA	AA	AA	BB	AA	AA	AA	BB	BB
1_157642897	AA	AA	AA	AA	BB	AA	AA	AA	BB	BB	AA	AA	AA	BB	AA	AA	AA	BB	BB	AA	BB	BB	AA	AA	AA	BB	AA	BB	BB	AA	AA	BB	BB	AA	-	AA	AA	BB	AA	BB	AA	AA	AA	BB	AA	AA	AA	BB	BB
1_157642907	AA	AA	AA	AA	BB	AA	AA	AA	BB	BB	AA	AA	AA	BB	AA	AA	AA	BB	BB	AA	BB	BB	AA	AA	AA	BB	AA	BB	BB	AA	AA	BB	BB	AA	-	AA	AA	BB	AA	BB	AA	AA	AA	BB	AA	AA	AA	BB	BB
1_159698563	AA	AA	AA	AA	BB	AA	AA	AA	BB	BB	AA	AA	AA	BB	AA	AA	AA	BB	BB	AA	BB	BB	AA	AA	AA	BB	AA	BB	BB	AA	AA	BB	BB	AA	BB	AA	AA	BB	AA	BB	AA	AA	AA	BB	AA	AA	AA	BB	BB
1_161924898	AA	AA	AA	AA	BB	AA	AA	AA	BB	BB	AA	AA	AA	BB	AA	AA	AA	BB	BB	AA	BB	BB	AA	AA	AA	BB	AA	BB	BB	AA	AA	BB	BB	AA	BB	AA	AA	BB	AA	BB	AA	AA	AA	BB	AA	AA	AA	BB	BB
1_161929250	AA	AA	-	AA	BB	AA	AA	AA	BB	BB	AA	AA	AA	BB	AA	AA	AA	BB	BB	AA	BB	BB	AA	AA	AA	BB	AA	BB	BB	AA	AA	BB	BB	AA	BB	AA	AA	BB	AA	BB	AA	AA	AA	BB	AA	AA	AA	BB	BB
1_163793264	AA	AA	AA	AA	BB	AA	AA	AA	BB	BB	AA	AA	AA	BB	AA	AA	AA	BB	BB	AA	BB	BB	AA	AA	AA	BB	AA	BB	BB	AA	AA	BB	BB	AA	BB	AA	AA	BB	AA	BB	AA	AA	AA	BB	AA	AA	AA	BB	BB
1_164258104	AA	AA	AA	AA	BB	AA	AA	AA	BB	BB	AA	AA	AA	BB	AA	AA	AA	BB	BB	AA	BB	BB	AA	AA	AA	BB	AA	BB	BB	AA	AA	BB	BB	AA	BB	AA	AA	BB	AA	BB	AA	AA	AA	BB	AA	AA	AA	BB	BB
1_164258150	AA	AA	AA	AA	BB	AA	AA	AA	BB	BB	AA	AA	AA	BB	AA	AA	AA	BB	BB	AA	BB	BB	AA	AA	AA	BB	AA	BB	BB	AA	AA	BB	BB	AA	BB	AA	AA	BB	AA	BB	AA	AA	AA	BB	AA	AA	AA	BB	BB
1_164830049	AA	AA	AA	AA	BB	AA	AA	AA	BB	BB	AA	AA	AA	BB	AA	AA	AA	BB	BB	AA	BB	BB	AA	AA	AA	BB	AA	BB	BB	AA	AA	BB	BB	AA	BB	AA	AA	BB	AA	BB	AA	AA	AA	BB	AA	AA	AA	BB	BB
1_164858326	AA	AA	AA	AA	BB	AA	AA	AA	BB	BB	AA	AA	AA	BB	AA	AA	AA	BB	BB	AA	BB	BB	AA	AA	AA	BB	AA	BB	BB	AA	AA	BB	BB	AA	BB	AA	AA	BB	AA	BB	AA	AA	AA	BB	AA	AA	AA	BB	BB
1_166794560	AA	AA	AA	AA	BB	AA	AA	AA	BB	BB	AA	AA	AA	BB	AA	AA	AA	BB	BB	AA	BB	BB	AA	BB	AA	BB	AA	BB	BB	AA	AA	BB	BB	AA	BB	AA	AA	BB	AA	BB	AA	AA	AA	-	AA	AA	AA	BB	-
1_168103982	AA	AA	AA	AA	BB	AA	AA	AA	BB	BB	AA	AA	AA	BB	AB	AB	AA	BB	BB	AA	BB	BB	AA	BB	AA	BB	AA	BB	BB	AA	AA	BB	BB	AA	BB	AA	AA	BB	AA	BB	AA	AA	AA	BB	AA	AA	AA	BB	BB
1_168103997	AA	AA	AA	AA	BB	AA	AA	AA	BB	BB	AA	AA	AA	BB	AA	AB	AA	BB	BB	AA	BB	BB	AA	BB	AA	BB	AA	BB	BB	AA	AA	BB	BB	AA	BB	AA	AA	BB	AA	BB	AA	AA	AA	BB	AA	AA	AA	BB	BB
1_181494302	AA	AA	AA	AA	BB	AA	AA	AA	BB	BB	AA	AA	AA	BB	AA	AA	AA	BB	AA	AA	BB	BB	BB	BB	AA	BB	AA	BB	BB	AA	AA	BB	BB	AA	BB	AA	AA	BB	AA	BB	AA	AA	AA	BB	AA	AA	AA	BB	BB
1_182972438	AA	AA	AA	AA	BB	AA	AA	AA	BB	BB	AA	AA	AA	BB	AA	AA	AA	BB	AA	AA	BB	BB	BB	BB	AA	BB	AA	BB	BB	AA	AA	BB	BB	AA	BB	AA	AA	BB	AA	BB	AA	AA	AA	BB	AA	AA	AA	BB	BB
1_182972444	AA	AA	AA	AA	BB	AA	AA	AA	BB	BB	AA	AA	AA	BB	AA	AA	AA	BB	AA	AA	BB	BB	BB	BB	AA	BB	AA	BB	BB	AA	AA	BB	BB	AA	BB	AA	AA	BB	AA	BB	AA	AA	AA	BB	AA	AA	AA	BB	BB
1_182972491	AA	AA	AA	AA	BB	AA	AA	AA	BB	BB	AA	AA	AA	BB	AA	AA	AA	BB	AA	AA	BB	BB	BB	BB	AA	BB	AA	BB	BB	AA	AA	BB	BB	AA	BB	AA	AA	BB	AA	BB	AA	AA	AA	BB	AA	AA	AA	BB	BB
1_190408834	AA	AA	AA	AA	BB	AA	AA	AA	BB	BB	AA	AA	AA	BB	AA	AA	AA	BB	AA	AA	BB	BB	BB	BB	AA	BB	AA	BB	BB	AA	AA	BB	BB	AA	BB	AA	AA	BB	AA	BB	AA	AA	AA	BB	AA	AA	AA	BB	BB
1_190408850	AA	AA	AA	AA	BB	AA	AA	AA	BB	BB	AA	AA	AA	BB	AA	AA	AA	BB	AA	AA	BB	BB	BB	BB	AA	BB	AA	BB	BB	AA	AA	BB	BB	AA	BB	AA	AA	BB	AA	BB	AA	AA	AA	BB	AA	AA	AA	BB	BB
1_192531201	AA	AA	AA	AA	BB	AA	AA	AA	BB	BB	AA	AA	AA	BB	AA	AA	AA	BB	AA	AA	BB	BB	BB	BB	AA	BB	AA	BB	BB	AA	AA	BB	BB	AA	BB	AA	AA	BB	AA	BB	AA	AA	AA	-	AA	AA	AA	BB	BB
1_192531202	AA	AA	AA	AA	BB	AA	AA	AA	BB	BB	AA	AA	AA	BB	AA	AA	AA	BB	AA	AA	BB	BB	BB	BB	AA	BB	AA	BB	BB	AA	AA	BB	BB	AA	BB	AA	AA	BB	AA	BB	AA	AA	AA	-	AA	AA	AA	BB	BB
1_193213414	AA	AA	AA	AA	BB	AA	AA	AA	BB	BB	-	AA	AA	BB	AA	AA	AA	BB	AA	AA	BB	BB	BB	BB	AA	BB	AA	BB	BB	AA	AA	BB	BB	AA	BB	AA	AA	BB	AA	BB	AA	AA	AA	BB	AA	AA	AA	BB	BB
1_194197584	AA	AA	AA	AA	BB	AA	AA	AA	BB	BB	AA	AA	AA	BB	AA	AA	AA	BB	AA	AA	BB	AB	BB	BB	AA	BB	AA	BB	BB	AA	AA	BB	BB	AA	BB	AA	AA	BB	AA	BB	AA	AA	AA	BB	AA	-	AA	BB	BB
1_194223681	AA	AA	AA	AA	BB	AA	AA	AA	BB	BB	AA	AA	AA	BB	AA	AA	AA	BB	AA	AA	BB	BB	BB	BB	AA	BB	AA	BB	BB	AA	AA	BB	BB	AA	BB	AA	AA	BB	AA	BB	AA	AA	AA	BB	AA	AA	AA	BB	BB
1_194223693	AA	AA	AA	AA	BB	AA	AA	AA	BB	BB	AA	AA	AA	BB	AA	AA	AA	BB	AA	AA	BB	BB	BB	BB	AA	BB	AA	BB	BB	AA	AA	BB	BB	AA	BB	AA	AA	BB	AA	BB	AA	AA	AA	BB	AA	AA	AA	BB	BB
1_194223739	AA	AA	AA	AA	BB	AA	AA	AA	BB	BB	AA	AA	AA	BB	AA	AA	AA	BB	AA	AA	BB	BB	BB	BB	AA	BB	AA	BB	BB	AA	AA	BB	BB	AA	BB	AA	AA	BB	AA	BB	AA	AA	AA	BB	AA	AA	AA	BB	BB
1_194223749	AA	AA	AA	AA	BB	AA	AA	AA	BB	BB	AA	AA	AA	BB	AA	AA	AA	BB	AA	AA	BB	BB	BB	BB	AA	BB	AA	BB	BB	AA	AA	BB	BB	AA	BB	AA	AA	BB	AA	BB	AA	AA	AA	BB	AA	AA	AA	BB	BB
1_194716693	AA	AA	AA	AA	BB	AA	AA	AA	BB	BB	AA	AA	AA	BB	AA	AA	AA	BB	AA	AA	BB	BB	BB	BB	AA	BB	AA	BB	BB	AA	AA	BB	BB	AA	BB	AA	AA	BB	AA	BB	AA	AA	AA	BB	AA	AA	AA	BB	BB
1_195743599	AA	AA	AA	AA	BB	AA	AA	AA	BB	BB	AA	AA	AA	BB	AA	AA	AA	BB	AA	AA	BB	BB	BB	BB	AA	BB	AA	BB	BB	AA	AA	BB	BB	AA	BB	AA	AA	BB	AA	BB	AA	AA	AA	BB	AA	AA	AA	BB	BB
1_201308178	AA	AA	AA	AA	BB	AA	AA	AA	BB	BB	AA	AA	AA	BB	AA	AA	AA	BB	AA	AA	BB	BB	BB	BB	AA	BB	AA	BB	BB	AA	AA	BB	BB	AA	BB	AA	AA	BB	AA	BB	AA	AA	AA	BB	AB	AA	AA	BB	BB
1_204998254	AA	AA	AA	AA	BB	AA	AA	AA	BB	BB	AA	AA	AA	BB	AA	AA	AA	BB	AA	AA	BB	BB	BB	BB	AA	BB	AA	BB	BB	AA	AA	BB	BB	AA	BB	AA	AA	BB	AA	BB	AA	AA	AA	BB	AA	AA	AA	BB	BB
1_205424734	AA	AA	AA	AA	BB	AA	AA	AA	BB	BB	AA	AA	AA	BB	AA	AA	AA	BB	AA	AA	BB	BB	BB	BB	AA	BB	AA	BB	BB	AA	AA	BB	BB	AA	BB	AA	AA	BB	AA	BB	AA	AA	AA	BB	AA	AA	AA	BB	BB
1_213795079	AA	AA	AA	AA	BB	AA	AA	AA	AA	BB	AA	AA	AA	BB	AA	AA	AA	BB	AA	AA	BB	AB	BB	BB	AA	BB	AA	BB	BB	AA	AA	BB	BB	AA	BB	BB	AA	BB	AA	AA	BB	AA	AA	-	AA	AA	AA	BB	BB
1_213797338	AA	AA	AA	AA	BB	AA	AA	AA	AA	BB	AA	AA	AA	BB	AA	AA	AA	BB	AA	AA	BB	AB	BB	BB	AA	BB	AA	BB	BB	AA	AA	BB	BB	AA	BB	BB	AA	BB	AA	AA	BB	AA	-	BB	AA	AA	AA	BB	BB
1_213797403	AA	AA	AA	AA	BB	AA	AA	AA	AA	BB	AA	AA	AA	BB	AA	AA	AA	BB	AA	AA	BB	AB	BB	BB	AA	BB	AA	BB	BB	AA	AA	BB	BB	AA	BB	BB	AA	BB	AA	AA	BB	AA	-	BB	AA	AA	AA	BB	BB
1_213807561	AA	AA	AA	AA	BB	AA	AA	AA	AA	BB	AA	AA	AA	BB	AA	AA	AA	BB	AA	AA	BB	AB	BB	BB	AA	BB	AA	BB	BB	AA	AA	BB	BB	AA	BB	BB	AA	BB	AA	AA	BB	AA	AA	BB	AA	AA	AA	BB	BB
1_214283924	AA	AA	AA	AA	BB	AA	AA	AA	AA	BB	AA	AA	AA	BB	AA	AA	AA	BB	AA	AA	BB	AB	BB	BB	AA	BB	AA	BB	BB	AA	AA	BB	BB	AA	BB	BB	AA	BB	AA	AA	BB	AA	AA	BB	AA	AA	AA	BB	BB
1_214283954	AA	AA	AA	AA	BB	AA	AA	AA	AA	BB	AA	AA	AA	BB	AA	AA	AA	BB	AA	AA	BB	AB	BB	BB	AA	BB	AA	BB	BB	AA	AA	BB	BB	AA	BB	BB	AA	BB	AA	AA	BB	AA	AA	BB	AA	AA	AA	BB	BB
2_512082	BB	BB	BB	AA	BB	BB	AA	AA	BB	BB	AA	AA	AA	BB	AA	BB	AA	BB	BB	BB	BB	AA	BB	BB	BB	BB	AA	AA	AA	AA	BB	AA	AA	BB	BB	BB	BB	AA	BB	BB	AA	BB	AA	AB	AA	AA	BB	AA	AA
2_512083	BB	BB	BB	AA	BB	BB	AA	AA	BB	BB	AA	AA	AA	BB	AA	BB	AA	BB	BB	BB	BB	AA	BB	BB	BB	BB	AA	AA	AA	AA	BB	AA	AA	BB	BB	BB	BB	AA	BB	BB	AA	BB	AA	AB	AA	AA	BB	AA	AA
2_512120	BB	BB	BB	AA	BB	BB	AA	AA	BB	BB	AA	AA	AA	BB	AA	BB	AA	BB	BB	BB	BB	AA	BB	BB	BB	BB	AA	AA	AA	AA	BB	AA	AA	BB	BB	BB	BB	AA	BB	BB	AA	BB	AA	AB	AA	AA	BB	AA	AA
2_512130	BB	BB	BB	AA	BB	BB	AA	AA	BB	BB	AA	AA	AA	BB	AA	BB	AA	BB	BB	BB	BB	AA	BB	BB	BB	BB	AA	AA	AA	AA	BB	AA	AA	BB	BB	BB	BB	AA	BB	BB	AA	BB	AA	AB	AA	AA	BB	AA	AA
2_1458304	BB	BB	BB	AA	BB	BB	AA	AA	BB	BB	AA	AA	AA	BB	AA	BB	AA	BB	BB	BB	BB	AA	BB	BB	BB	BB	AA	AA	AA	AA	BB	AA	AA	BB	BB	BB	BB	AA	BB	BB	AA	BB	AA	AB	AA	AA	BB	AA	AA
2_2778653	BB	BB	BB	AA	BB	BB	AA	AA	BB	BB	AA	AA	AA	BB	AA	BB	AA	BB	BB	BB	BB	AA	BB	BB	BB	BB	AA	BB	AA	AA	BB	AA	AA	BB	BB	BB	AA	AA	BB	BB	AA	BB	AA	AA	-	AA	BB	AA	AA
2_2778791	BB	BB	BB	AA	BB	BB	AA	AA	BB	BB	AA	AA	AA	BB	AA	BB	AA	BB	BB	BB	BB	AA	BB	BB	BB	BB	AA	BB	AA	AA	BB	AA	AA	BB	BB	BB	AA	AA	BB	BB	AA	BB	AA	-	AA	AA	BB	AA	-
2_3447210	BB	BB	BB	AA	BB	BB	AA	AA	BB	BB	AA	AA	AA	BB	AA	BB	AA	BB	BB	BB	BB	AA	BB	BB	BB	BB	AA	AA	AA	AA	BB	AA	AA	BB	BB	BB	BB	AA	BB	BB	AA	BB	AA	AB	AA	AA	BB	AA	AA
2_4439031	BB	BB	BB	AA	BB	BB	AA	AA	BB	BB	AA	AA	AA	BB	AA	BB	AA	BB	BB	BB	BB	AA	BB	BB	BB	BB	AA	AA	AA	AA	BB	AA	AA	BB	BB	BB	BB	AA	BB	BB	AA	BB	AA	AB	AA	AA	BB	AA	AA
2_4439037	BB	BB	BB	AA	BB	BB	AA	AA	BB	BB	AA	AA	AA	BB	AA	BB	AA	BB	BB	BB	BB	AA	BB	BB	BB	BB	AA	AA	AA	AA	BB	AA	AA	BB	BB	BB	BB	AA	BB	BB	AA	BB	AA	AB	AA	AA	BB	AA	AA
2_5367054	BB	BB	BB	AA	BB	BB	AA	AA	BB	BB	AA	AA	AA	BB	AA	BB	AA	BB	BB	BB	BB	AA	BB	BB	BB	BB	AA	AA	AA	AA	BB	AA	AA	BB	BB	BB	BB	AA	BB	BB	AA	BB	AA	AB	AA	AA	BB	AA	AA
2_5367071	BB	BB	BB	AA	BB	BB	AA	AA	BB	BB	AA	AA	AA	BB	AA	BB	AA	BB	BB	BB	BB	AA	BB	BB	BB	BB	AA	AA	AA	AA	BB	AA	AA	BB	BB	BB	BB	AA	BB	BB	AA	BB	AA	AB	AA	AA	BB	AA	AA
2_5367152	BB	BB	BB	AA	BB	BB	AA	AA	BB	BB	AA	AA	AA	BB	AA	BB	AA	BB	BB	BB	BB	AA	BB	BB	BB	BB	AA	AA	AA	AA	BB	AA	AA	BB	BB	BB	BB	AA	BB	BB	AA	BB	AA	AB	AA	AA	BB	AA	AA
2_5367195	BB	BB	BB	AA	BB	BB	AA	AA	BB	BB	AA	AA	AA	BB	AA	BB	AA	BB	BB	BB	BB	AA	BB	BB	BB	BB	AA	AA	AA	AA	BB	AA	AA	BB	BB	BB	BB	AA	BB	BB	AA	BB	AA	AB	AA	AA	BB	AA	AA
2_5367198	BB	BB	BB	AA	BB	BB	AA	AA	BB	BB	AA	AA	AA	BB	AA	BB	AA	BB	BB	BB	BB	AA	BB	BB	BB	BB	AA	AA	AA	AA	BB	AA	AA	BB	BB	BB	BB	AA	BB	BB	AA	BB	AA	AB	AA	AA	BB	AA	AA
2_7348731	BB	BB	BB	AA	BB	BB	AA	AA	BB	BB	AA	AA	AA	BB	AA	BB	AA	BB	BB	BB	BB	AA	BB	BB	BB	BB	AA	BB	AA	AA	BB	AA	AA	BB	BB	BB	AA	AA	BB	BB	AA	BB	AA	AB	AA	AA	BB	AA	AA
2_7348910	BB	BB	BB	AA	BB	BB	AA	AA	BB	BB	AA	AA	AA	BB	AA	BB	AA	BB	BB	BB	BB	AA	BB	BB	BB	BB	AA	BB	AA	AA	BB	AA	AA	BB	BB	BB	AA	AA	BB	BB	AA	BB	AA	AB	AA	AA	BB	AA	AA
2_7380606	BB	BB	BB	AA	BB	BB	AA	AA	BB	BB	AA	AA	AA	BB	AA	BB	AA	BB	BB	BB	BB	AA	BB	BB	BB	BB	AA	BB	AA	AA	BB	AA	AA	BB	BB	BB	AA	AA	BB	BB	AA	BB	AA	AB	AA	AA	BB	AA	AA
2_9119184	BB	BB	BB	AA	BB	BB	AA	AA	BB	BB	AA	AA	AA	BB	AA	BB	AA	BB	BB	BB	BB	AA	BB	BB	BB	BB	AA	BB	AA	AA	BB	AA	AA	BB	BB	BB	AA	AA	BB	BB	AA	BB	AA	BB	AA	AA	BB	AA	AA
2_11664019	BB	BB	BB	AA	BB	BB	AA	AA	BB	BB	AA	AA	AA	BB	AA	BB	AA	BB	BB	BB	BB	AA	BB	BB	BB	BB	AA	BB	AA	AA	BB	AA	AA	BB	BB	BB	AA	AA	BB	BB	AA	BB	AA	AB	AA	AA	BB	AA	AA
2_11664024	BB	BB	BB	AA	BB	BB	AA	AA	BB	BB	AA	AA	AA	BB	AA	BB	AA	BB	BB	BB	BB	AA	BB	BB	BB	BB	AA	BB	AA	AA	BB	AA	AA	BB	BB	BB	AA	AA	BB	BB	AA	BB	AA	AB	AA	AA	BB	AA	AA
2_11664083	BB	BB	BB	AA	BB	BB	AA	AA	BB	BB	AA	AA	AA	BB	AA	BB	AA	BB	BB	BB	BB	AA	BB	BB	BB	BB	AA	BB	AA	AA	BB	AA	AA	BB	BB	BB	AA	AA	BB	BB	AA	BB	AA	AB	AA	AA	BB	AA	AA
2_11664109	BB	BB	BB	AA	BB	BB	AA	AA	BB	BB	AA	AA	AA	BB	AA	BB	AA	BB	BB	BB	BB	AA	BB	BB	BB	BB	AA	BB	AA	AA	BB	AA	AA	BB	BB	BB	AA	AA	BB	BB	AA	BB	AA	AB	AA	AA	BB	AA	AA
2_11664138	BB	BB	BB	AA	BB	BB	AA	AA	BB	BB	AA	AA	AA	BB	AA	BB	AA	BB	BB	BB	BB	AA	BB	BB	BB	BB	AA	BB	AA	AA	BB	AA	AA	BB	BB	BB	AA	AA	BB	BB	AA	BB	AA	AB	AA	AA	BB	AA	AA
2_14245763	BB	BB	BB	AA	BB	BB	AA	AA	BB	BB	AA	AA	AA	BB	AA	BB	AB	AA	BB	AB	BB	AA	BB	BB	BB	BB	AA	BB	AB	AA	AB	AA	AA	BB	BB	BB	AA	AA	BB	BB	AA	BB	AA	AA	AA	AA	BB	AA	BB
2_14245775	BB	BB	BB	AA	BB	BB	AA	AA	BB	BB	AA	AA	AA	BB	AA	BB	AB	AA	BB	AB	BB	AA	BB	BB	BB	BB	AA	BB	AB	AA	AB	AA	AA	BB	BB	BB	AA	AA	BB	BB	AA	BB	AA	AA	AA	AA	BB	AA	BB
2_20684258	BB	BB	BB	AA	BB	BB	AA	AA	BB	BB	AA	AA	AA	BB	AA	BB	AA	AA	BB	AB	BB	AA	BB	BB	BB	BB	AA	BB	AA	AA	AB	AA	AA	BB	BB	BB	AA	AA	BB	BB	AA	BB	AA	AA	AA	AA	BB	AA	BB
2_20722409	BB	BB	BB	AA	BB	BB	AA	AA	BB	BB	AA	AA	AA	BB	AA	BB	AA	AA	BB	AB	BB	AA	BB	BB	BB	BB	AA	BB	AA	AA	AB	AA	AA	BB	BB	BB	AA	AA	BB	BB	AA	BB	AA	AA	AA	AA	BB	AA	BB
2_21572690	-	BB	-	AA	BB	BB	AA	AA	AA	BB	AA	AA	AA	BB	AA	BB	AA	AA	BB	AA	BB	AA	BB	BB	BB	BB	AA	BB	AA	AA	AB	AA	BB	BB	BB	BB	AA	AA	BB	BB	AA	BB	AA	AA	AA	BB	BB	BB	BB
2_26489021	BB	BB	BB	AA	BB	BB	AA	AA	AA	BB	AA	AA	AA	BB	AA	BB	AA	AA	BB	BB	BB	AA	BB	BB	BB	BB	AA	BB	AA	AA	AB	AA	BB	BB	BB	BB	AA	AA	BB	BB	AA	BB	AA	AA	AA	BB	BB	BB	BB
2_26489022	BB	BB	BB	AA	BB	BB	AA	AA	AA	BB	AA	AA	AA	BB	AA	BB	AA	AA	BB	BB	BB	AA	BB	BB	BB	BB	AA	BB	AA	AA	AB	AA	BB	BB	BB	BB	AA	AA	BB	BB	AA	BB	AA	AA	AA	BB	BB	BB	BB
2_26489041	BB	BB	BB	AA	BB	BB	AA	AA	AA	BB	AA	AA	AA	BB	AA	BB	AA	AA	BB	BB	BB	AA	BB	BB	BB	BB	AA	BB	AA	AA	AB	AA	BB	BB	BB	BB	AA	AA	BB	BB	AA	BB	AA	AA	AA	BB	BB	BB	BB
2_26890821	BB	BB	BB	AA	BB	BB	AA	AA	AA	BB	AA	AA	AA	BB	AA	BB	AA	AA	BB	BB	BB	AA	BB	BB	BB	BB	AA	BB	AA	AA	AB	AA	BB	BB	BB	BB	AA	AA	BB	BB	AA	BB	AA	AA	AA	BB	BB	BB	BB
2_26890905	BB	BB	BB	AA	BB	BB	AA	AA	AA	BB	AA	AA	AA	BB	AA	BB	AA	AA	BB	BB	BB	AA	BB	BB	BB	BB	AA	BB	AA	AA	AB	AA	BB	BB	BB	BB	AA	AA	BB	BB	AA	BB	AA	AA	AA	BB	BB	BB	BB
2_27389036	BB	BB	BB	AA	BB	BB	AA	AA	AA	BB	AA	AA	AA	BB	AA	BB	AA	AA	AB	BB	BB	AA	BB	BB	BB	BB	AA	BB	AA	AA	AB	AA	BB	BB	BB	BB	AA	AA	BB	BB	AA	BB	-	AA	AA	BB	BB	BB	BB
2_27389062	BB	BB	BB	AA	BB	BB	AA	AA	AA	BB	AA	AA	AA	BB	AA	BB	AA	AA	BB	BB	BB	AA	BB	BB	BB	BB	AA	BB	AA	AA	AB	AA	BB	BB	BB	BB	AA	AA	BB	BB	AA	BB	-	AA	AA	BB	BB	BB	BB
2_28047585	BB	BB	BB	AA	BB	BB	AA	AA	AA	BB	AA	AA	AA	BB	AA	BB	AA	AA	BB	BB	BB	AA	BB	BB	BB	BB	AA	BB	AA	AA	AB	AA	BB	BB	BB	BB	AA	AA	BB	BB	AA	BB	AA	AA	AA	BB	BB	BB	BB
2_28047589	BB	BB	BB	AA	BB	BB	AA	AA	AA	BB	AA	AA	AA	BB	AA	BB	AA	AA	BB	BB	BB	AA	BB	BB	BB	BB	AA	BB	AA	AA	AB	AA	BB	BB	BB	BB	AA	AA	BB	BB	AA	BB	AA	AA	AA	BB	BB	BB	BB
2_35556292	BB	BB	BB	AA	BB	BB	AA	AA	AA	BB	AA	AA	AA	BB	AA	BB	BB	AA	BB	BB	BB	AA	BB	BB	BB	BB	AA	BB	AA	AA	AB	AA	BB	BB	BB	BB	AA	AA	BB	BB	AA	BB	AB	AA	AA	BB	BB	BB	BB
2_35758410	BB	BB	BB	AA	BB	BB	AA	AA	AA	BB	AA	AA	AA	BB	AA	BB	BB	AA	BB	BB	BB	AA	BB	BB	BB	BB	AA	BB	AA	AA	AB	AA	BB	BB	BB	BB	AA	AA	BB	BB	AA	BB	AA	AA	AA	BB	BB	BB	BB
2_35758469	BB	BB	BB	AA	BB	BB	AA	AA	AA	BB	AA	AA	AA	BB	AA	BB	BB	AA	BB	BB	BB	AA	BB	BB	BB	BB	AA	BB	AA	AA	AB	AA	BB	BB	BB	BB	AA	AA	BB	BB	AA	BB	AA	AA	AA	BB	BB	BB	BB
2_35758485	BB	BB	BB	AA	BB	BB	AA	AA	AA	BB	AA	AA	AA	BB	AA	BB	BB	AA	BB	BB	BB	AA	BB	BB	BB	BB	AA	BB	AA	AA	AB	AA	BB	BB	BB	BB	AA	AA	BB	BB	AA	BB	AA	AA	AA	BB	BB	BB	BB
2_35758506	BB	BB	BB	AA	BB	BB	AA	AA	AA	BB	AA	AA	AA	BB	AA	BB	BB	AA	BB	BB	BB	AA	BB	BB	BB	BB	AA	BB	AA	AA	AB	AA	BB	BB	BB	BB	AA	AA	BB	BB	AA	BB	AA	AA	AA	BB	BB	BB	BB
2_35759131	BB	BB	BB	AA	BB	BB	AA	AA	AA	BB	AA	AA	AA	BB	AA	BB	BB	AA	BB	BB	BB	AA	BB	BB	BB	BB	AA	BB	AA	AA	AB	AA	BB	BB	BB	BB	AA	AA	BB	BB	AA	BB	AA	AA	AA	BB	BB	BB	BB
2_35759213	BB	BB	BB	AA	BB	BB	AA	AA	AA	BB	AA	AA	AA	BB	AA	BB	BB	AA	BB	BB	BB	AA	BB	BB	BB	BB	AA	BB	AA	AA	AB	AA	BB	BB	BB	BB	AA	AA	BB	BB	AA	BB	AA	AA	AA	BB	BB	BB	BB
2_35759235	BB	BB	BB	AA	BB	BB	AA	AA	AA	BB	AA	AA	AA	BB	AA	BB	BB	AA	BB	BB	BB	AA	BB	BB	BB	BB	AA	BB	AA	AA	AB	AA	BB	BB	BB	BB	AA	AA	BB	BB	AA	BB	AA	AA	AA	BB	BB	BB	BB
2_36781945	BB	BB	BB	AA	BB	BB	AA	AA	AA	BB	AA	AA	AA	BB	AA	BB	BB	AA	BB	BB	BB	AA	BB	BB	BB	BB	AA	BB	AA	AA	AB	AA	BB	BB	BB	BB	AA	AA	BB	BB	AA	BB	AA	AA	BB	BB	BB	BB	BB
2_39574504	BB	BB	BB	AA	BB	BB	AA	AB	AA	BB	AA	AA	AA	BB	AA	BB	BB	AA	BB	BB	BB	AA	BB	BB	BB	BB	AA	BB	AA	AA	AB	AA	BB	BB	BB	BB	AA	AA	BB	BB	AA	BB	AA	AA	BB	BB	BB	BB	BB
2_39574577	BB	BB	BB	AA	BB	BB	AA	AB	AA	BB	AA	AA	AA	BB	AA	BB	BB	AA	BB	BB	BB	AA	BB	BB	BB	BB	AA	BB	AA	AA	AB	AA	BB	BB	BB	BB	AA	AA	BB	BB	AA	BB	AA	AA	BB	BB	BB	BB	BB
2_45971868	BB	BB	BB	AA	BB	BB	AA	AB	BB	BB	AA	AA	AA	BB	AA	BB	BB	AA	BB	BB	BB	AA	BB	BB	BB	BB	AA	BB	AB	AA	AB	AA	BB	AA	BB	BB	AA	AA	BB	BB	AA	BB	AA	AA	BB	BB	AA	BB	BB
2_45971872	BB	BB	BB	AA	BB	BB	AA	AB	BB	BB	AA	AA	AA	BB	AA	BB	BB	AA	BB	BB	BB	AA	BB	BB	BB	BB	AA	BB	AB	AA	AB	AA	BB	AA	BB	BB	AA	AA	BB	BB	AA	BB	AA	AA	BB	BB	AA	BB	BB
2_46635523	BB	BB	BB	AA	BB	BB	AA	AB	BB	BB	AA	AA	AA	BB	AA	BB	BB	AA	BB	BB	BB	AA	-	BB	BB	BB	AA	BB	AA	AA	AB	AA	BB	AA	BB	BB	AA	AA	BB	BB	AA	BB	AA	AA	BB	BB	AA	BB	-
2_65202000	BB	BB	BB	AA	BB	BB	AA	BB	BB	BB	AB	AA	AA	BB	AA	BB	AA	AA	BB	BB	AA	AA	AA	BB	BB	BB	AA	BB	AA	BB	AB	BB	BB	AA	BB	AB	AA	AA	BB	BB	AA	BB	AA	AA	BB	BB	AA	BB	BB
2_65776030	BB	BB	BB	AA	BB	BB	AA	BB	BB	BB	AB	AA	AA	BB	AA	BB	AA	AA	BB	BB	AA	AA	AA	BB	BB	BB	AA	BB	AA	BB	AB	BB	BB	AA	BB	AB	AA	AA	BB	BB	AA	BB	AA	AA	BB	BB	AA	BB	BB
2_66479530	BB	BB	BB	AA	BB	BB	AA	BB	BB	BB	AB	AA	AA	BB	AA	BB	AA	AA	BB	BB	AA	AA	AA	BB	BB	BB	AA	BB	AA	BB	AB	BB	BB	BB	BB	BB	AA	AA	BB	BB	AA	BB	AA	AA	BB	BB	AA	BB	BB
2_69035214	BB	BB	BB	AA	BB	BB	AA	BB	BB	BB	AB	AA	AA	BB	AA	BB	AA	AA	BB	BB	AA	AA	AA	BB	BB	BB	AA	BB	AA	BB	AB	BB	BB	BB	BB	BB	AA	AA	BB	BB	AA	BB	AA	AA	BB	BB	AA	BB	BB
2_69035223	BB	BB	BB	AA	BB	BB	AA	BB	BB	BB	AB	AA	AA	BB	AA	BB	AA	AA	BB	BB	AA	AA	AA	BB	BB	BB	AA	BB	AA	BB	AB	BB	BB	BB	BB	BB	AA	AA	BB	BB	AA	BB	AA	AA	BB	BB	AA	BB	BB
2_69035225	BB	BB	BB	AA	BB	BB	AA	BB	BB	BB	AB	AA	AA	BB	AA	BB	AA	AA	BB	BB	AA	AA	AA	BB	BB	BB	AA	BB	AA	BB	AB	BB	BB	BB	BB	BB	AA	AA	BB	BB	AA	BB	AA	AA	BB	BB	AA	BB	BB
2_69035239	BB	BB	BB	AA	BB	BB	AA	BB	BB	BB	AB	AA	AA	BB	AA	BB	AA	AA	BB	BB	AA	AA	AA	BB	BB	BB	AA	BB	AA	BB	AB	BB	BB	BB	BB	BB	AA	AA	BB	BB	AA	BB	AA	AA	BB	BB	AA	BB	BB
2_69035269	BB	BB	BB	AA	BB	BB	AA	BB	BB	BB	AB	AA	AA	BB	AA	BB	AA	AA	BB	BB	AA	AA	AA	BB	BB	BB	AA	BB	AA	BB	AB	BB	BB	BB	BB	BB	AA	AA	BB	BB	AA	BB	AA	AA	BB	BB	AA	BB	BB
2_69035291	BB	BB	BB	AA	BB	BB	AA	BB	BB	BB	AB	AA	AA	BB	AA	BB	AA	AA	BB	BB	AA	AA	AA	BB	BB	BB	AA	BB	AA	BB	AB	BB	BB	BB	BB	BB	AA	AA	BB	BB	AA	BB	AA	AA	BB	BB	AA	BB	BB
2_71733215	BB	BB	BB	AA	BB	BB	AA	BB	BB	BB	AB	AA	AA	BB	AA	BB	AA	AA	BB	BB	AA	AA	AA	BB	BB	BB	AA	BB	AA	BB	AB	BB	BB	BB	BB	BB	AA	AA	BB	BB	AA	BB	AA	AA	BB	BB	AA	BB	BB
2_71733245	BB	BB	BB	AA	BB	BB	AA	BB	BB	BB	AB	AA	AA	BB	AA	BB	AA	AA	BB	BB	AA	AA	AA	BB	BB	BB	AA	BB	AA	BB	AB	BB	BB	BB	BB	BB	AA	AA	BB	BB	AA	BB	AA	AA	BB	BB	AA	BB	BB
2_71733779	BB	BB	BB	AA	BB	BB	AA	BB	BB	BB	AB	AA	AA	BB	AA	BB	AA	AA	BB	BB	AA	AA	AA	BB	BB	BB	AA	BB	AA	BB	AB	BB	BB	BB	BB	BB	AA	AA	BB	BB	AA	BB	AA	AA	BB	BB	AA	BB	BB
2_72932454	BB	BB	BB	AA	BB	BB	AA	BB	BB	BB	AB	AA	AA	BB	AA	BB	AA	AA	BB	BB	AA	AA	AA	BB	BB	BB	AA	BB	AA	BB	AB	BB	BB	BB	BB	BB	AA	AA	BB	BB	AA	BB	AA	AA	BB	BB	AA	BB	BB
2_75787081	BB	BB	BB	AA	BB	BB	AA	BB	BB	BB	AB	AA	AA	BB	AA	BB	AA	AA	BB	BB	AA	AA	AA	BB	BB	BB	AA	BB	AA	BB	AB	BB	BB	BB	BB	BB	AA	AA	BB	BB	AA	BB	AA	AA	BB	BB	AA	BB	BB
2_87873043	BB	BB	BB	AB	BB	BB	AA	BB	BB	BB	AB	AA	AA	BB	AB	BB	AA	AA	BB	BB	BB	AA	AA	AB	BB	BB	AA	BB	AA	BB	BB	BB	BB	BB	AA	BB	AA	AA	BB	BB	AA	BB	AA	AA	BB	BB	AA	BB	BB
2_87873258	BB	BB	BB	AB	BB	BB	AA	BB	BB	BB	AB	AA	AA	BB	AA	BB	AA	AA	BB	BB	BB	AA	AA	AB	BB	BB	AA	BB	AA	BB	BB	BB	BB	BB	AA	BB	AA	AA	BB	BB	AA	BB	AA	AA	BB	BB	AA	BB	BB
2_88888118	-	BB	BB	AB	BB	BB	AA	BB	BB	BB	AB	AA	AA	BB	AA	BB	AA	AA	BB	BB	AA	AA	AA	AB	BB	BB	AA	BB	AA	BB	BB	BB	BB	BB	-	BB	AA	AA	BB	BB	AA	BB	AA	AA	BB	BB	AA	BB	BB
2_88888125	-	BB	BB	AB	BB	BB	AA	BB	BB	BB	AB	AA	AA	BB	AA	BB	AA	AA	BB	BB	AA	AA	AA	AB	BB	BB	AA	BB	AA	BB	BB	BB	BB	BB	-	BB	AA	AA	BB	BB	AA	BB	AA	AA	BB	BB	AA	BB	BB
2_91412043	BB	BB	BB	BB	BB	BB	AA	BB	BB	BB	-	AA	AA	BB	AA	BB	AA	AA	BB	BB	BB	AA	AA	AB	BB	BB	AA	BB	AA	BB	BB	BB	BB	BB	AA	BB	AA	AA	BB	BB	AA	BB	AA	AA	BB	BB	AA	BB	BB
2_91607635	BB	BB	BB	BB	BB	BB	AA	BB	BB	BB	BB	AA	AA	BB	AA	BB	AA	AA	BB	BB	BB	AA	AB	AB	BB	BB	AA	BB	AA	BB	BB	BB	BB	BB	AA	BB	AA	AA	BB	BB	AA	BB	AA	AA	BB	BB	AA	BB	BB
2_91607670	BB	BB	BB	BB	BB	BB	AA	BB	BB	BB	BB	AA	AA	BB	AA	BB	AA	AA	BB	BB	BB	AA	AA	AB	BB	BB	AA	BB	AA	BB	BB	BB	BB	BB	AA	BB	AA	AA	BB	BB	AA	BB	AA	AA	BB	BB	AA	BB	BB
2_91607676	BB	BB	BB	BB	BB	BB	AA	BB	BB	BB	BB	AA	AA	BB	AA	BB	AA	AA	BB	BB	BB	AA	AA	AB	BB	BB	AA	BB	AA	BB	BB	BB	BB	BB	AA	BB	AA	AA	BB	BB	AA	BB	AA	AA	BB	BB	AA	BB	BB
2_91609427	BB	BB	BB	BB	BB	BB	AA	BB	BB	BB	AB	AA	AA	BB	AA	BB	AA	AA	BB	BB	BB	AA	AA	AA	BB	BB	AA	BB	AA	BB	BB	BB	BB	BB	AA	BB	AA	AA	BB	BB	AA	BB	AA	AA	BB	BB	AA	BB	BB
2_96133653	BB	BB	BB	BB	BB	BB	AA	BB	BB	BB	AA	AA	AA	BB	AA	BB	AA	AA	BB	BB	BB	AA	AA	AB	BB	BB	AA	BB	AA	BB	BB	BB	BB	BB	AA	BB	AA	AA	BB	BB	AA	BB	AA	AA	AA	BB	AA	BB	BB
2_96133664	BB	BB	BB	BB	BB	BB	AA	BB	BB	BB	AA	AA	AA	BB	AA	BB	AA	AA	BB	BB	BB	AA	AA	AB	BB	BB	AA	BB	AA	BB	BB	BB	BB	BB	AA	BB	AA	AA	BB	BB	AA	BB	AA	AA	AA	BB	AA	BB	BB
2_101263448	BB	BB	BB	BB	BB	BB	AA	BB	BB	BB	AA	AA	AA	BB	AA	BB	AA	AA	AA	BB	BB	AA	AA	AB	BB	BB	AA	BB	AA	BB	BB	AA	BB	BB	AA	BB	AA	AA	BB	BB	AA	BB	AA	AA	AA	BB	AA	BB	BB
2_110068808	AA	BB	AA	AA	BB	BB	AA	BB	BB	BB	AB	AA	AA	BB	AA	BB	BB	AA	AA	BB	BB	AA	AA	BB	BB	BB	AA	BB	AA	BB	BB	AA	BB	BB	AA	BB	AA	AA	BB	BB	AA	BB	AA	AB	AA	BB	AA	BB	BB
2_110068823	AA	BB	AA	AA	BB	BB	AA	BB	BB	BB	AB	AA	AA	BB	AA	BB	BB	AA	AA	BB	BB	AA	AA	BB	BB	BB	AA	BB	AA	BB	BB	AA	BB	BB	AA	BB	AA	AA	BB	BB	AA	BB	AA	AB	AA	BB	AA	BB	BB
2_110605555	AA	BB	-	AA	BB	BB	AA	BB	-	BB	BB	AA	AA	BB	AA	BB	BB	AA	AA	BB	BB	AA	AA	BB	BB	BB	AA	BB	AA	BB	BB	AA	BB	BB	AA	BB	AA	AA	BB	BB	AA	BB	AA	AB	AA	-	AA	BB	BB
2_110605609	AA	BB	-	AA	BB	BB	AA	BB	-	BB	BB	AA	AA	BB	AA	BB	BB	AA	AA	BB	BB	AA	AA	BB	BB	BB	AA	BB	AA	BB	BB	AA	BB	BB	AA	BB	AA	AA	BB	BB	AA	BB	AA	AB	AA	-	AA	BB	BB
2_116196709	AA	BB	AA	AA	BB	BB	AA	BB	BB	BB	AA	AA	AA	BB	AA	BB	BB	AA	AA	BB	BB	AA	AA	BB	BB	BB	AA	AA	AA	BB	BB	AA	BB	BB	AA	BB	AA	AA	BB	BB	AA	AA	BB	BB	AA	BB	AA	AA	BB
2_116196748	AA	BB	AA	AA	BB	BB	AA	BB	BB	BB	AA	AA	AA	BB	AA	BB	BB	AA	AA	BB	BB	AA	AA	BB	BB	BB	AA	AA	AA	BB	BB	AA	BB	BB	AA	BB	AA	AA	BB	BB	AA	AA	BB	BB	AA	BB	AA	AA	BB
2_116624968	AA	BB	AA	AA	BB	BB	AA	BB	BB	BB	AA	AA	AA	BB	AA	BB	BB	AA	AA	BB	BB	AA	AA	BB	BB	BB	AA	AA	AA	BB	BB	AA	BB	BB	AA	BB	AA	AA	BB	BB	AA	AA	BB	BB	AA	BB	AA	AA	BB
2_116640455	AA	BB	AA	AA	BB	BB	AA	BB	BB	BB	AA	AA	AA	BB	AA	BB	BB	AA	AA	BB	BB	AA	AA	BB	BB	BB	AA	AA	AA	BB	BB	AA	BB	BB	AA	BB	AA	AA	BB	BB	AA	AA	BB	BB	AA	BB	AA	AA	BB
2_116640699	AA	BB	AA	AA	BB	BB	AA	BB	BB	BB	AA	AA	AA	BB	AA	BB	BB	AA	AA	BB	BB	AA	AA	BB	BB	BB	AA	AA	AA	BB	BB	AA	BB	BB	AA	BB	AA	AA	BB	BB	AA	AA	BB	BB	AA	BB	AA	AA	BB
2_116657238	-	BB	AA	AA	BB	BB	AA	BB	BB	BB	AA	AA	AA	BB	AA	BB	BB	AA	AA	BB	BB	AA	AA	BB	BB	BB	AA	AA	AA	BB	BB	AA	BB	BB	AA	BB	AA	AA	BB	BB	AA	AA	BB	BB	AA	BB	AA	AA	BB
2_122245825	AA	BB	AA	AA	BB	BB	AA	BB	BB	BB	AA	AA	AA	BB	AA	BB	BB	AA	AA	BB	BB	AA	AA	BB	BB	BB	AA	AA	AA	BB	BB	BB	BB	BB	AA	BB	AA	AA	BB	BB	AA	AA	BB	BB	AA	BB	AA	AA	BB
2_123664918	AA	BB	AA	AA	BB	BB	AA	BB	BB	BB	AA	AA	AA	BB	AA	BB	BB	AA	AA	BB	BB	AA	AA	BB	BB	BB	AA	AA	AA	BB	BB	BB	BB	BB	AA	BB	AA	AA	BB	BB	AA	AA	BB	BB	AA	BB	AA	AA	AA
2_123666682	AA	BB	AA	AA	BB	BB	AA	BB	BB	BB	AA	AA	AA	BB	AA	BB	BB	AA	AA	BB	BB	AA	AA	BB	BB	BB	AA	AA	AA	BB	BB	BB	BB	BB	AA	BB	AA	AA	BB	BB	AA	AA	BB	BB	AA	BB	AA	AA	AA
2_123666703	AA	BB	AA	AA	BB	BB	AA	BB	BB	BB	AA	AA	AA	BB	AA	BB	BB	AA	AA	BB	BB	AA	AA	BB	BB	BB	AA	AA	AA	BB	BB	BB	BB	BB	AA	BB	AA	AA	BB	BB	AA	AA	BB	BB	AA	BB	AA	AA	AA
2_124082044	AA	BB	AA	AA	BB	BB	AA	BB	BB	BB	AA	AA	AA	BB	AA	BB	BB	AA	AA	BB	BB	AA	AA	BB	BB	BB	AA	AA	AA	BB	BB	BB	BB	BB	AA	BB	AA	AA	BB	BB	AA	AA	BB	BB	AA	BB	AA	AA	AA
2_124551263	AA	BB	AA	AA	BB	BB	AA	BB	BB	BB	AA	AA	AA	BB	AA	BB	BB	AA	AA	BB	BB	AA	AA	BB	BB	BB	AA	AA	AA	BB	BB	BB	BB	BB	AA	BB	AA	AA	BB	BB	AA	AA	BB	BB	-	BB	AA	AA	AA
2_124984875	AA	BB	AA	AA	BB	BB	AA	BB	BB	BB	AA	AA	AA	BB	AA	BB	BB	AA	AA	BB	BB	AA	AA	BB	BB	BB	AA	AA	AA	BB	BB	BB	AA	BB	AA	BB	AA	AA	BB	BB	AA	AA	BB	BB	AA	BB	AA	AA	AA
2_125082589	AA	BB	AA	AA	BB	BB	AA	BB	BB	BB	AA	AA	AA	BB	AA	BB	BB	AA	AA	BB	BB	AA	AA	BB	BB	BB	AA	AA	AA	BB	BB	BB	AA	BB	AA	BB	AA	AA	BB	BB	AA	AA	BB	BB	AA	BB	AA	AA	AA
2_125505156	AA	BB	AA	AA	BB	BB	AA	BB	BB	BB	AB	AA	AA	BB	AA	BB	BB	AA	AA	BB	BB	AA	AA	BB	BB	BB	AA	AA	AA	BB	BB	BB	AA	BB	AA	BB	AA	AA	BB	BB	AA	AA	BB	-	-	BB	AA	AA	AA
2_125612959	AA	BB	AA	AA	BB	BB	AA	BB	BB	BB	AB	AA	AA	BB	AA	BB	BB	AA	AA	BB	BB	AA	AA	BB	BB	BB	AA	AA	AA	BB	BB	BB	AA	BB	AA	BB	AA	AA	BB	BB	AA	AA	BB	BB	AA	BB	AA	AA	AA
2_127807778	AA	BB	AA	AA	BB	BB	AA	BB	BB	BB	AB	AA	AA	BB	AA	BB	BB	AA	AA	BB	BB	AA	AA	BB	BB	BB	AA	AA	AA	BB	BB	BB	AA	BB	AA	BB	AA	AA	BB	BB	AA	AA	BB	BB	AA	BB	AA	BB	AA
2_128668655	AA	BB	AA	AA	BB	BB	BB	BB	BB	BB	AB	AA	AA	BB	AA	BB	AA	AA	AA	BB	-	AA	AA	BB	BB	BB	AA	AA	BB	BB	BB	BB	AA	AA	BB	BB	AA	AA	BB	BB	AA	AA	BB	BB	AA	BB	AA	BB	AA
2_129774542	AA	BB	AA	AA	BB	BB	BB	BB	BB	BB	AB	AA	AA	BB	AA	BB	AA	AA	AA	BB	BB	AA	AA	BB	BB	BB	AA	AA	BB	BB	BB	BB	AA	AA	BB	BB	AA	AA	BB	BB	AA	AA	BB	BB	AA	BB	AA	BB	AA
2_129774554	AA	BB	AA	AA	BB	BB	BB	BB	BB	BB	AB	AA	AA	BB	AA	BB	AB	AA	AA	BB	BB	AA	AA	BB	BB	BB	AA	AA	BB	BB	BB	BB	AA	AA	BB	BB	AA	AA	BB	BB	AA	AA	BB	BB	AA	BB	AA	BB	AA
2_129774603	AA	BB	AA	AA	BB	BB	BB	BB	BB	BB	AB	AA	AA	BB	AA	BB	AA	AA	AA	BB	BB	AA	AA	BB	BB	BB	AA	AA	BB	BB	BB	BB	AA	AA	BB	BB	AA	AA	BB	BB	AA	AA	BB	BB	AA	BB	AA	BB	AA
2_129774612	AA	BB	AA	AA	BB	BB	BB	BB	BB	BB	AB	AA	AA	BB	AA	BB	AA	AA	AA	BB	BB	AA	AA	BB	BB	BB	AA	AA	BB	BB	BB	BB	AA	AA	BB	BB	AA	AA	BB	BB	AA	AA	BB	BB	AA	BB	AA	BB	AA
2_129778070	AA	BB	AA	AA	BB	BB	BB	BB	BB	BB	AB	AA	AA	BB	AA	BB	AA	AA	AA	BB	BB	AA	AA	BB	BB	BB	AA	AA	BB	BB	BB	BB	AA	AA	BB	BB	AA	AA	BB	BB	AA	AA	BB	BB	AA	BB	AA	BB	AA
2_129778077	AA	BB	AA	AA	BB	BB	BB	BB	BB	BB	AB	AA	AA	BB	AA	BB	AA	AA	AA	BB	BB	AA	AA	BB	BB	BB	AA	AA	BB	BB	BB	BB	AA	AA	BB	BB	AA	AA	BB	BB	AA	AA	BB	BB	AA	BB	AA	BB	AA
2_129848468	AA	BB	AA	AA	BB	BB	BB	BB	BB	BB	AB	AA	AA	BB	AA	BB	AA	AA	AA	BB	BB	AA	AA	BB	BB	BB	AA	AA	BB	BB	BB	BB	AA	AA	BB	BB	AA	AA	BB	BB	AA	AA	BB	BB	AA	BB	AA	BB	AA
2_140184620	AA	BB	AA	AA	BB	BB	BB	BB	BB	AA	BB	AA	AA	BB	AA	AA	BB	AA	AA	BB	AA	AA	AA	AA	BB	BB	AA	AB	BB	BB	BB	BB	AA	BB	BB	BB	AA	AA	BB	BB	AA	AA	BB	AA	AA	BB	AB	BB	AA
2_140541480	AA	BB	AA	AA	BB	BB	BB	BB	BB	AA	AB	AA	AA	BB	AA	AA	BB	AA	AA	BB	AA	AA	-	AA	BB	BB	AA	AB	BB	BB	BB	BB	AA	BB	BB	BB	AA	AA	BB	BB	AA	AA	BB	-	AA	BB	AB	BB	AA
2_145932365	AA	BB	AA	AA	BB	BB	BB	AB	BB	AA	AA	AA	AA	BB	AA	AA	BB	AA	AA	BB	AA	AA	AA	AA	BB	BB	BB	AB	AA	BB	BB	BB	AA	BB	BB	BB	AA	AA	BB	BB	AA	BB	BB	AA	AA	AA	AB	BB	AA
2_148256217	AA	BB	AA	AA	BB	BB	BB	AB	BB	AA	AA	AA	AA	BB	AA	AA	BB	AA	AA	BB	AA	AA	AA	AA	BB	BB	BB	AB	AA	BB	BB	BB	AA	BB	BB	BB	AA	AA	BB	AA	AA	BB	BB	-	AA	AA	AB	BB	AA
2_149114937	AA	BB	AA	AA	BB	BB	BB	AB	BB	AA	AA	AA	AA	BB	AA	AA	BB	AB	AA	BB	AA	AA	AA	AA	BB	BB	BB	AB	AA	BB	BB	BB	AA	BB	BB	BB	AA	AA	BB	AA	AA	BB	BB	AA	AA	AA	AB	BB	AA
2_149115120	AA	BB	AA	AA	BB	BB	BB	AA	BB	AA	AA	AA	AA	BB	AA	AA	BB	AA	AA	BB	AA	AA	AA	AA	BB	BB	BB	AB	AA	BB	BB	BB	AA	BB	BB	BB	AA	AA	BB	AA	AA	BB	BB	AA	AA	AA	AB	BB	AA
2_149115132	AA	BB	AA	AA	BB	BB	BB	AA	BB	AA	AA	AA	AA	BB	AA	AA	BB	AA	AA	BB	AA	AA	AA	AA	BB	BB	BB	AB	AA	BB	BB	BB	AA	BB	BB	BB	AA	AA	BB	AA	AA	BB	BB	AA	AA	AA	AB	BB	AA
2_149115159	AA	BB	AA	AA	BB	BB	BB	AA	BB	AA	AA	AA	AA	BB	AA	AA	BB	AA	AA	BB	AA	AA	AA	AA	BB	BB	BB	AB	AA	BB	BB	BB	AA	BB	BB	BB	AA	AA	BB	AA	AA	BB	BB	AA	AA	AA	AB	BB	AA
2_149115165	AA	BB	AA	AA	BB	BB	BB	AA	BB	AA	AA	AA	AA	BB	AA	AA	BB	AA	AA	BB	AA	AA	AA	AA	BB	BB	BB	AB	AA	BB	BB	BB	AA	BB	BB	BB	AA	AA	BB	AA	AA	BB	BB	AA	AA	AA	AB	BB	AA
2_155903659	AA	BB	-	AA	BB	BB	BB	AB	BB	AA	AA	AA	AA	BB	AA	AA	BB	AA	AA	BB	AA	AA	AA	AA	BB	BB	BB	AB	AA	BB	BB	BB	BB	BB	BB	AA	AA	AA	BB	AA	AA	BB	BB	AA	AA	AA	AB	BB	AA
2_155903863	-	BB	AA	AA	BB	BB	BB	AB	BB	AA	AA	AA	AA	BB	AA	AA	BB	AA	AA	BB	AA	AA	AA	AA	BB	BB	BB	AB	AA	BB	BB	BB	BB	BB	BB	AA	AA	AA	BB	AA	AA	BB	BB	AA	AA	AA	AB	BB	AA
2_155904606	AA	BB	AA	AA	BB	BB	BB	AA	BB	AA	AA	AA	AA	BB	AA	AA	BB	AA	AA	BB	AA	AA	AA	AA	BB	BB	BB	AB	AA	BB	BB	BB	BB	BB	BB	AA	AA	AA	BB	AA	AA	BB	BB	AA	AA	AA	AB	BB	-
2_155904648	AA	BB	AA	AA	BB	BB	BB	AA	BB	AA	AA	AA	AA	BB	AA	AA	BB	AA	AA	BB	AA	AA	AA	AA	BB	BB	BB	AB	AA	BB	BB	BB	BB	BB	BB	AA	AA	AA	BB	AA	AA	BB	BB	AA	AA	AA	AB	BB	-
2_155904665	AA	BB	AA	AA	BB	BB	BB	AA	BB	AA	AA	AA	AA	BB	AA	AA	BB	AA	AA	BB	AA	AA	AA	AA	BB	BB	BB	AB	AA	BB	BB	BB	BB	BB	BB	AA	AA	AA	BB	AA	AA	BB	BB	AA	AA	AA	AB	BB	-
2_155904691	AA	BB	AA	AA	BB	BB	BB	AA	BB	AA	AA	AA	AA	BB	AA	AA	BB	AA	AA	BB	AA	AA	AA	AA	BB	BB	BB	AB	AA	BB	BB	BB	BB	BB	BB	AA	AA	AA	BB	AA	AA	BB	BB	AA	AA	AA	AB	BB	-
2_157266587	AA	BB	AA	AA	BB	BB	BB	AB	BB	AA	AA	AA	AA	BB	AA	AA	BB	AA	AA	BB	AA	AA	AA	AA	BB	BB	BB	BB	AA	BB	BB	AA	BB	BB	BB	AA	AA	AA	BB	AA	AA	BB	BB	AA	AA	AA	AB	BB	AA
2_158785654	AA	BB	AA	AA	BB	BB	BB	AB	BB	AA	AA	AA	AA	BB	AA	AA	BB	AA	AA	BB	AA	AA	AA	AA	AA	BB	BB	BB	AA	BB	BB	AA	BB	BB	BB	AA	AA	AA	BB	AA	AA	BB	BB	AA	AA	AA	AB	BB	AA
2_164434160	AA	AA	AA	BB	AA	BB	BB	AB	BB	AA	AA	AA	AA	BB	AA	AA	AA	AA	AA	BB	AA	AA	AA	AA	AA	BB	BB	BB	AA	BB	BB	AA	AA	BB	BB	AA	AA	AA	AB	AA	AA	BB	AB	AA	AA	AA	AB	BB	AA
2_164434178	AA	AA	AA	BB	AA	BB	BB	AB	BB	AA	AA	AA	AA	BB	AA	AA	AA	AA	AA	BB	AA	AA	AA	AA	AA	BB	BB	BB	AA	BB	BB	AA	AA	BB	BB	AA	AA	AA	AB	AA	AA	BB	AB	AA	AA	AA	AB	BB	AA
2_165190242	AA	AA	AA	BB	AA	BB	BB	AB	BB	AA	AA	BB	AA	BB	AA	AA	AA	AA	AA	BB	AA	AA	AA	AA	AA	BB	BB	BB	AA	BB	BB	AA	AA	BB	BB	AA	AA	AA	AB	AA	AA	BB	AB	AA	AA	AA	AB	BB	AA
2_165214749	AA	AA	AA	BB	AA	AB	AB	AA	AB	AA	AA	BB	AA	BB	AA	AA	AA	AA	AA	BB	AA	AA	AA	AA	AA	BB	BB	AB	AA	BB	BB	AA	AA	AB	BB	AA	AA	AA	AA	AA	AA	BB	AB	AA	AA	AA	AB	BB	AA
2_166021780	AA	AA	AA	BB	AA	BB	BB	BB	BB	AA	AA	BB	AA	BB	AA	AA	AA	AA	AA	BB	AA	AA	AA	AA	AA	BB	BB	BB	AA	BB	BB	AA	AA	BB	BB	AA	AA	AA	AB	AA	AA	BB	AB	AA	AA	AA	AB	BB	AA
2_166021819	AA	AA	AA	BB	AA	BB	BB	BB	BB	AA	AA	BB	AA	BB	AA	AA	AA	AA	AA	BB	AA	AA	AA	AA	AA	BB	BB	BB	AA	BB	BB	AA	AA	BB	BB	AA	AA	AA	AB	AA	AA	BB	AB	AA	AA	AA	AB	BB	AA
2_166021834	AA	AA	AA	BB	AA	BB	BB	BB	BB	AA	AA	BB	AA	BB	AA	AA	AA	AA	AA	BB	AA	AA	AA	AA	AA	BB	BB	BB	AA	BB	BB	AA	AA	BB	BB	AA	AA	AA	AB	AA	AA	BB	AB	AA	AA	AA	AB	BB	AA
2_166076895	AA	AA	AA	BB	AA	BB	BB	AB	BB	AA	AA	BB	AA	BB	AA	AA	AA	AA	AA	BB	AA	AA	AA	AA	AA	BB	BB	BB	AA	BB	BB	AA	AA	BB	BB	AA	AA	AA	AB	AA	AA	BB	AB	AA	AA	AA	AB	BB	AA
2_166076901	AA	AA	AA	BB	AA	BB	BB	AB	BB	AA	AA	BB	AA	BB	AA	AA	AA	AA	AA	BB	AA	AA	AA	AA	AA	BB	BB	BB	AA	BB	BB	AA	AA	BB	BB	AA	AA	AA	AB	AA	AA	BB	AB	AA	AA	AA	AB	BB	AA
2_166076946	AA	AA	AA	BB	AA	BB	BB	AB	BB	AA	AA	BB	AA	BB	AA	AA	AA	AA	AA	BB	AA	AA	AA	AA	AA	BB	BB	BB	AA	BB	BB	AA	AA	BB	BB	AA	AA	AA	AB	AA	AA	BB	AB	AA	AA	AA	AB	BB	AA
2_166076973	AA	AA	AA	BB	AA	BB	BB	AB	BB	AA	AA	BB	AA	BB	AA	AA	AA	AA	AA	BB	AA	AA	AA	AA	AA	BB	BB	BB	AA	BB	BB	AA	AA	BB	BB	AA	AA	AA	AB	AA	AA	BB	AB	AA	AA	AA	AB	BB	AA
2_166336637	AA	AA	AA	BB	AA	BB	BB	AB	BB	AA	AA	BB	AA	BB	AA	AA	AA	AA	AA	BB	AA	AA	AA	AA	AA	BB	BB	BB	AA	BB	BB	AA	AA	BB	BB	AA	AA	AA	AB	AA	AA	BB	AB	AA	AA	AA	AB	BB	AA
2_166387202	AA	AA	AA	BB	AA	BB	BB	BB	BB	AA	AA	BB	AA	BB	AA	AA	AA	AA	AA	BB	AA	AA	AA	AA	AA	BB	BB	BB	AA	BB	BB	AA	AA	BB	BB	AA	AA	AA	AB	AA	AA	BB	AB	AA	AA	AA	AB	BB	AA
2_166463176	AA	AA	AA	BB	AA	BB	BB	AB	BB	AA	AA	BB	AA	BB	AA	AA	AA	AA	AA	BB	AA	AA	AA	AA	AA	BB	BB	BB	AA	BB	BB	AA	AA	BB	BB	AA	AA	AA	AB	AA	AA	BB	AB	AA	AA	AA	AB	BB	AA
2_166490621	AA	AA	AA	BB	AA	BB	BB	BB	BB	AA	AA	BB	AA	BB	AA	AA	AA	AA	AA	BB	AA	AA	AA	AA	AA	BB	BB	BB	AA	BB	BB	AA	AA	BB	BB	AA	AA	AA	AB	AA	AA	BB	AB	AA	AA	AA	AB	BB	AA
2_166490624	AA	AA	AA	BB	AA	BB	BB	BB	BB	AA	AA	BB	AA	BB	AA	AA	AA	AA	AA	BB	AA	AA	AA	AA	AA	BB	BB	BB	AA	BB	BB	AA	AA	BB	BB	AA	AA	AA	AB	AA	AA	BB	AB	AA	AA	AA	AB	BB	AA
2_166607309	AA	AA	AA	BB	AA	BB	BB	AB	BB	AA	AA	BB	AA	BB	AA	AA	AA	AA	AA	BB	AA	AA	AA	AA	AA	BB	BB	BB	AA	BB	BB	AA	AA	BB	BB	AA	AA	AA	AB	AA	AA	BB	AB	AA	AA	AA	AB	BB	AA
2_166607322	AA	AA	AA	BB	AA	BB	BB	AB	BB	AA	AA	BB	AA	BB	AA	AA	AA	AA	AA	BB	AA	AA	AA	AA	AA	BB	BB	BB	AA	BB	BB	AA	AA	BB	BB	AA	AA	AA	AB	AA	AA	BB	AB	AA	AA	AA	AB	BB	AA
2_166972669	AA	AA	AA	BB	AA	BB	BB	AB	BB	AA	AA	BB	AA	BB	AA	AA	AA	AA	AA	BB	AA	AA	AA	AA	AA	BB	BB	BB	AA	BB	BB	AA	AA	BB	BB	AA	AA	AA	AB	AA	AA	BB	AB	AA	AA	AA	AB	BB	AA
2_167014309	AA	AA	AA	BB	AA	BB	BB	AB	BB	AA	AA	BB	AA	BB	AA	AA	AA	AA	AA	BB	AA	AA	AA	AA	AA	BB	BB	BB	AA	BB	BB	AA	AA	BB	BB	AA	AA	AA	AB	AA	AA	BB	AB	-	AA	AA	AB	BB	AA
2_167016183	AA	AA	AA	BB	AA	BB	BB	AB	BB	AA	AA	BB	AA	BB	AA	AA	AA	AA	AA	BB	AA	AA	AA	AA	AA	BB	BB	BB	AA	BB	BB	AA	AA	BB	BB	AA	AA	AA	AB	AA	AA	BB	AB	AA	AA	AA	AB	BB	-
2_167054720	AA	AA	AA	BB	AA	BB	BB	AB	BB	AA	AA	BB	AA	BB	AA	AA	AA	AA	AA	BB	AA	AA	AA	AA	AA	BB	BB	BB	AA	BB	BB	AA	AA	BB	BB	AA	AA	AA	AB	AA	AA	BB	AB	AA	AA	AA	AB	BB	AA
2_167054762	AA	AA	AA	BB	AA	BB	BB	AB	BB	AA	AA	BB	AA	BB	AA	AA	AA	AA	AA	BB	AA	AA	AA	AA	AA	BB	BB	BB	AA	BB	BB	AA	AA	BB	BB	AA	AA	AA	AB	AA	AA	BB	AB	AA	AA	AA	AB	BB	AA
2_167274191	AA	AA	AA	BB	AA	BB	BB	AB	BB	AA	AA	BB	AA	BB	AA	AA	AA	AA	AA	BB	AA	AA	AA	AA	AA	BB	BB	BB	AA	BB	BB	AA	AA	BB	BB	AA	AA	AA	AB	AA	AA	BB	AB	AA	AA	AA	AB	BB	AA
2_167274218	AA	AA	AA	BB	AA	BB	BB	AB	BB	AA	AA	BB	AA	BB	AA	AA	AA	AA	AA	BB	AA	AA	AA	AA	AA	BB	BB	BB	AA	BB	BB	AA	AA	BB	BB	AA	AA	AA	AB	AA	AA	BB	AB	AA	AA	AA	AB	BB	AA
2_167277674	AA	AA	AA	BB	AA	BB	BB	AB	BB	AA	AA	BB	AA	BB	AA	AA	AA	AA	AA	BB	AA	AA	AA	AA	AA	BB	BB	BB	AA	BB	BB	AA	AA	BB	BB	AA	AA	AA	AB	AA	AA	BB	AB	AA	AA	AA	AB	BB	AA
2_167277683	AA	AA	AA	BB	AA	BB	BB	AB	BB	AA	AA	BB	AA	BB	AA	AA	AA	AA	AA	BB	AA	AA	AA	AA	AA	BB	BB	BB	AA	BB	BB	AA	AA	BB	BB	AA	AA	AA	AB	AA	AA	BB	AB	AA	AA	AA	AB	BB	AA
2_167721801	AA	AA	AA	BB	AA	BB	BB	AB	BB	AA	AA	BB	AA	BB	AA	AA	AA	AA	AA	BB	AA	AA	AA	AA	AA	BB	BB	BB	AA	BB	BB	AA	AA	BB	BB	AA	AA	AA	AB	AA	-	BB	AB	-	AA	AA	AB	BB	AA
2_167722261	AA	AA	AA	BB	AA	BB	BB	AA	-	AA	AA	BB	AA	BB	AA	AA	AA	AA	AA	BB	AA	AA	AA	AA	AA	BB	BB	BB	AA	BB	BB	AA	AA	BB	BB	AA	AA	AA	AB	AA	AA	BB	AB	AA	AA	AA	AB	BB	AA
2_167777776	AA	AA	AA	BB	AA	BB	BB	-	BB	AA	AA	BB	AA	BB	AA	AA	AA	AA	AA	BB	AA	AA	AA	AA	AA	BB	BB	BB	AA	BB	BB	AA	AA	BB	BB	AA	AA	AA	AB	AA	AA	BB	AB	AA	AA	AA	AB	BB	-
2_167818047	AA	AA	AA	BB	AA	BB	BB	AA	BB	AA	AA	BB	AA	BB	AA	AA	AA	AA	AA	BB	AA	AA	AA	AA	AA	BB	BB	BB	AA	BB	BB	AA	AA	BB	BB	AA	AA	AA	AB	AA	AA	BB	AB	AA	AA	AA	AB	BB	AA
2_167853704	AA	AA	AA	BB	AA	BB	BB	-	BB	AA	-	BB	AA	BB	AA	AA	AA	AA	AA	BB	AA	AA	AA	AA	AA	BB	BB	BB	AA	BB	BB	AA	AA	BB	BB	AA	AA	AA	AB	AA	AA	BB	AB	AA	AA	AA	AB	BB	-
2_168111982	AA	AA	AA	BB	AA	BB	BB	AA	BB	AA	AA	BB	AA	BB	AA	AA	AA	AA	AA	BB	AA	AA	AA	AA	AA	BB	BB	BB	AA	BB	BB	AA	AA	BB	BB	AA	AA	AA	AB	AA	AA	BB	AB	AA	AA	AA	AB	BB	AA
2_168517116	AA	AA	AA	BB	AA	BB	BB	BB	BB	AA	AA	BB	AA	BB	AA	AA	AA	AA	AA	BB	AA	AA	AA	AA	AA	BB	BB	BB	AA	BB	BB	AA	AA	BB	BB	AA	AA	AA	AB	AA	AA	BB	AB	AA	AA	AA	AB	BB	AA
2_168517179	AA	AA	AA	BB	AA	BB	BB	AB	BB	AA	AA	BB	AA	BB	AA	AA	AA	AA	AA	BB	AA	AA	AA	AA	AA	BB	BB	BB	AA	BB	BB	AA	AA	BB	BB	AA	AA	AA	AB	AA	AA	BB	AB	AA	AA	AA	AB	BB	AA
2_168617826	AA	AA	AA	BB	AA	BB	BB	BB	BB	AA	AA	BB	AA	BB	AA	AA	AA	AA	AA	BB	AA	AA	AA	AA	AA	BB	BB	BB	AA	BB	BB	AA	AA	BB	BB	AA	AA	AA	AB	AA	AA	BB	AB	AA	AA	AA	AB	BB	AA
2_168617827	AA	AA	AA	BB	AA	BB	BB	BB	BB	AA	AA	BB	AA	BB	AA	AA	AA	AA	AA	BB	AA	AA	AA	AA	AA	BB	BB	BB	AA	BB	BB	AA	AA	BB	BB	AA	AA	AA	AB	AA	AA	BB	AB	AA	AA	AA	AB	BB	AA
2_168617868	AA	AA	AA	BB	AA	BB	BB	BB	BB	AA	AA	BB	AA	BB	AA	AA	AA	AA	AA	BB	AA	AA	AA	AA	AA	BB	BB	BB	AA	BB	BB	AA	AA	BB	BB	AA	AA	AA	AB	AA	AA	BB	AB	AA	AA	AA	AB	BB	AA
2_168640994	AA	AA	AA	BB	AA	BB	BB	AB	BB	AA	AA	BB	AA	BB	AA	AA	AA	AA	AA	BB	AA	AA	AA	AA	AA	BB	BB	BB	AA	BB	BB	AA	AA	BB	BB	AA	AA	AB	AB	AA	AA	BB	AB	AA	AA	AA	AB	BB	AA
2_168653286	AA	AA	AA	BB	AA	BB	BB	AB	BB	AA	AA	BB	AA	BB	AA	AA	AA	AA	AA	BB	AA	AA	AA	AA	AA	BB	BB	BB	AA	BB	BB	AA	AA	BB	BB	AA	AA	AA	AB	AA	AA	BB	AB	AA	AA	AA	AB	BB	AA
2_168827021	AA	AA	AA	BB	AA	BB	BB	AB	BB	AA	AA	BB	AA	BB	AA	AA	AA	AA	AA	BB	AA	AA	AA	AA	AA	BB	BB	BB	AA	BB	BB	AA	AA	BB	BB	AA	AA	AA	AB	AA	AA	BB	AB	AA	AA	AA	AB	BB	AA
2_168827045	AA	AA	AA	BB	AA	BB	BB	AB	BB	AA	AA	BB	AA	BB	AA	AA	AA	AA	AA	BB	AA	AA	AA	AA	AA	BB	BB	BB	AA	BB	BB	AA	AA	BB	BB	AA	AA	AA	AB	AA	AA	BB	AB	AA	AA	AA	AB	BB	AA
2_168946433	AA	AA	AA	BB	AA	BB	BB	AB	BB	AA	AA	BB	AA	BB	AA	AA	AA	AA	AA	BB	AA	AA	AA	AA	AA	BB	BB	BB	AA	BB	BB	AA	AA	BB	BB	AA	AA	AA	AB	AA	AA	BB	AB	AA	AA	AA	AB	BB	AA
2_168946518	AA	AA	AA	BB	AA	BB	BB	AB	BB	AA	AA	BB	AA	BB	AA	AA	AA	AA	AA	BB	AA	AA	AA	AA	AA	BB	BB	BB	AA	BB	BB	AA	AA	BB	BB	AA	AA	AA	AB	AA	AA	BB	AB	AA	AA	AA	AB	BB	AA
2_168946589	AA	AA	AA	BB	AA	BB	BB	AB	BB	AA	AA	BB	AA	BB	AA	AA	AA	AA	AA	BB	AA	AA	AA	AA	AA	BB	BB	BB	AA	BB	BB	AA	AA	BB	BB	AA	AA	AA	AB	AA	AA	BB	AB	AA	AA	AA	AB	BB	AA
2_168946591	AA	AA	AA	BB	AA	BB	BB	AB	BB	AA	AA	BB	AA	BB	AA	AA	AA	AA	AA	BB	AA	AA	AA	AA	AA	BB	BB	BB	AA	BB	BB	AA	AA	BB	BB	AA	AA	AA	AB	AA	AA	BB	AB	AA	AA	AA	AB	BB	AA
2_169373271	AA	AA	AA	BB	AA	BB	BB	AB	BB	AA	AA	BB	AA	AA	AA	AA	AA	AA	AA	BB	AA	AA	AA	AA	AA	BB	BB	BB	AA	BB	BB	AA	AA	BB	BB	AA	AA	AA	AB	AA	AA	BB	AB	AA	AA	AA	AB	BB	AA
2_169454998	AA	AA	AA	BB	AA	BB	BB	AB	BB	AA	AA	BB	AA	AA	AA	AA	AA	AA	AA	BB	AA	AA	AA	AA	AA	BB	BB	BB	AA	BB	BB	AA	AA	BB	BB	AA	AA	AA	AB	AA	AA	BB	BB	AA	AA	AA	AB	BB	AA
2_169455061	AA	AA	AA	BB	AA	BB	BB	AB	BB	AA	AA	BB	AA	AA	AA	AA	AA	AA	AA	BB	AA	AA	AA	AA	AA	BB	BB	BB	AA	BB	BB	AA	AA	BB	BB	AA	AA	AA	AB	AA	AA	BB	BB	AA	AA	AA	AB	BB	AA
2_169455088	AA	AA	AA	BB	AA	BB	BB	AB	BB	AA	AA	BB	AA	AA	AA	AA	AA	AA	AA	BB	AA	AA	AA	AA	AA	BB	BB	BB	AA	BB	BB	AA	AA	BB	BB	AA	AA	AA	AB	AA	AA	BB	BB	AA	AA	AA	AB	BB	AA
2_169457360	AA	AA	AA	BB	AA	BB	BB	AB	BB	AA	AA	BB	AA	AA	AA	AA	AA	AA	AA	BB	AA	AA	AA	AA	AA	BB	BB	BB	AA	BB	BB	AA	AA	BB	BB	AA	AA	AA	AB	AA	AA	BB	AB	AA	AA	AA	AB	BB	AA
2_169936949	AA	AA	AA	BB	AA	BB	BB	AA	BB	AA	AA	BB	AA	AA	AA	AA	AA	AA	AA	BB	AA	AA	AA	AA	AA	BB	BB	BB	AA	BB	BB	AA	AA	BB	BB	AA	AA	AA	AB	AA	AA	BB	BB	AA	AA	AA	AB	BB	AA
2_172050042	AA	AA	AA	BB	AA	BB	BB	AB	BB	AA	-	BB	AA	AA	AA	AA	AA	AA	AA	BB	AA	AA	AA	AA	AA	BB	BB	BB	AA	BB	BB	AA	AA	BB	BB	AA	AA	AA	BB	AA	AA	BB	AB	AA	AA	AA	AB	BB	AA
2_172151268	AA	AA	AA	BB	AA	BB	BB	AB	AB	AA	AA	BB	AA	AA	AA	AA	AA	AA	AA	BB	AA	AA	AA	-	AA	BB	BB	BB	AA	BB	BB	AA	AA	BB	BB	AA	AA	AA	BB	AA	AA	BB	AB	AA	AA	AA	AB	BB	AA
2_179130539	BB	AA	BB	AA	AA	BB	BB	AB	BB	AA	AA	BB	BB	AA	BB	AA	AA	BB	AA	BB	AA	BB	AA	-	BB	BB	BB	BB	AA	BB	BB	AA	AB	BB	BB	AA	AA	AA	BB	AA	AA	BB	AA	AA	AA	AA	AB	AA	AA
2_179131113	BB	AA	BB	AA	AA	BB	BB	AB	BB	AA	AA	BB	BB	AA	BB	AA	AA	BB	AA	BB	AA	BB	AA	AA	BB	BB	BB	BB	AA	BB	BB	AA	AB	BB	BB	AA	AA	AA	BB	AA	AA	BB	AA	AA	AA	AA	AB	AA	AA
2_180268048	BB	AA	BB	AA	AA	AB	BB	BB	BB	AA	AA	BB	BB	AA	BB	AA	AA	BB	AA	BB	AA	BB	AA	AA	BB	BB	BB	BB	AA	BB	BB	AA	AB	BB	BB	AA	AA	AA	BB	AA	AA	BB	AA	AA	AA	AA	AB	AA	AA
2_180268060	BB	AA	BB	AA	AA	AB	BB	BB	BB	AA	AA	BB	BB	AA	BB	AA	AA	BB	AA	BB	AA	BB	AA	AA	BB	BB	BB	BB	AA	BB	BB	AA	AB	BB	BB	AA	AA	AA	BB	AA	AA	BB	AA	AA	AA	AA	AB	AA	AA
2_182451012	BB	AA	BB	AA	AA	AB	BB	BB	BB	AA	AA	BB	BB	AA	BB	AA	AA	BB	AA	BB	AA	BB	AA	AA	BB	BB	BB	BB	AA	BB	BB	AA	AB	BB	BB	AA	AA	AA	BB	AA	AA	BB	AA	AA	AA	AA	AB	AA	AA
2_183693182	BB	AA	BB	AA	AA	AB	BB	BB	BB	AA	AA	BB	BB	AA	BB	AA	AA	BB	AA	BB	AA	AB	AA	AA	BB	BB	BB	BB	AA	BB	BB	AA	AA	BB	BB	AA	AA	AA	BB	AA	AA	BB	AA	AA	AA	AA	AB	AA	AA
2_183693240	BB	AA	BB	AA	AA	AB	BB	BB	BB	AA	AA	BB	BB	AA	BB	AA	AA	BB	AA	BB	AA	AB	AA	AA	BB	BB	BB	BB	AA	BB	BB	AA	AA	BB	BB	AA	AA	AA	BB	AA	AA	BB	AA	AA	AA	AA	AB	AA	AA
2_184499875	BB	AA	BB	AA	AA	AB	BB	BB	BB	AA	AA	BB	BB	AA	BB	AA	AA	BB	AA	BB	AA	AB	BB	AA	BB	BB	BB	BB	AA	BB	BB	AA	AB	BB	BB	AA	AA	AA	BB	AA	AA	BB	AA	-	AA	AA	AB	AA	AA
2_186337350	BB	AA	BB	AA	AA	AB	BB	BB	BB	AA	AA	BB	BB	AA	BB	AA	AA	BB	AA	BB	AA	AB	BB	AA	BB	BB	-	BB	AA	BB	BB	AA	AB	BB	BB	AA	AA	AA	BB	AA	AA	BB	AA	AA	AA	AA	AB	AA	AA
2_188202840	BB	AA	BB	AA	AA	AB	BB	AA	BB	AA	AA	BB	BB	AA	BB	AA	AA	BB	AA	BB	AA	AB	BB	AA	BB	BB	BB	BB	AA	BB	BB	AA	BB	BB	BB	AA	AA	AA	BB	AA	AA	AA	AA	AA	AA	AA	AB	AA	AA
2_189564077	BB	AA	BB	AA	AA	AA	BB	AA	BB	AA	AA	BB	BB	AA	BB	AA	AA	BB	AA	BB	AA	AB	BB	AA	AA	BB	BB	BB	AA	BB	BB	AA	BB	BB	BB	AA	AA	AA	BB	AA	AA	AA	AA	AA	AA	AA	AB	AA	AA
2_189564094	BB	AA	BB	AA	AA	AA	BB	AA	BB	AA	AA	BB	BB	AA	BB	AA	AA	BB	AA	BB	AA	AB	BB	AA	AA	BB	BB	BB	AA	BB	BB	AA	BB	BB	BB	AA	AA	AA	BB	AA	AA	AA	AA	AA	AA	AA	AB	AA	AA
2_189673919	BB	AA	BB	AA	AA	AA	BB	AA	BB	AA	AA	BB	BB	AA	BB	AA	AA	BB	AA	BB	AA	AB	BB	AA	AA	BB	BB	BB	AA	BB	BB	AA	BB	BB	BB	AA	AA	AA	BB	AA	AA	AA	AA	AA	AA	AA	AB	AA	AA
2_189842563	BB	AA	BB	-	AA	AA	BB	AA	BB	AA	AA	BB	BB	AA	BB	AA	AA	BB	AA	BB	AA	AB	BB	AA	AA	BB	BB	BB	AA	BB	BB	AA	BB	BB	BB	AA	AA	AA	BB	AA	AA	AA	AA	AA	AA	AA	AB	AA	AA
2_189962711	BB	AA	BB	BB	AA	AA	BB	AA	BB	AA	AA	BB	BB	AA	BB	AA	AA	BB	AA	BB	AA	AB	BB	AA	AA	BB	BB	BB	AA	BB	BB	AA	BB	BB	BB	AA	AA	AA	BB	AA	AA	BB	AA	AA	AA	AA	AB	AA	AA
2_189989187	BB	AA	BB	BB	AA	AA	BB	AA	BB	AA	AA	BB	BB	AA	BB	AA	AA	BB	AA	BB	AA	AB	BB	AA	AA	BB	BB	BB	AA	BB	BB	AA	BB	BB	BB	AA	AA	AA	BB	AA	AA	BB	AA	AA	AA	AA	AB	AA	AA
2_195186159	BB	AA	BB	BB	AA	AA	BB	AA	AB	AA	AA	BB	BB	AA	BB	AA	AA	BB	AA	BB	AA	AB	AA	AA	AB	BB	BB	BB	AA	BB	BB	AA	BB	BB	BB	AA	AA	BB	AA	AA	AA	BB	AA	AB	AA	AA	AB	AA	AA
2_195186162	BB	AA	BB	BB	AA	AA	BB	AA	AB	AA	AA	BB	BB	AA	BB	AA	AA	BB	AA	BB	AA	AB	AA	AA	AB	BB	BB	BB	AA	BB	BB	AA	BB	BB	BB	AA	AA	BB	AA	AA	AA	BB	AA	AB	AA	AA	AB	AA	AA
2_195186196	BB	AA	BB	BB	AA	AA	BB	AA	AB	AA	AA	BB	BB	AA	BB	AA	AA	BB	AA	BB	AA	AB	AA	AA	AB	BB	BB	BB	AA	BB	BB	AA	BB	BB	BB	AA	AA	BB	AA	AA	AA	BB	AA	AB	AA	AA	BB	AA	AA
2_195885756	BB	AA	BB	BB	AA	AA	BB	AA	BB	AA	AA	BB	BB	AA	BB	AA	AA	BB	AA	BB	AA	AB	AA	AA	AB	BB	BB	BB	AA	BB	BB	AA	BB	BB	BB	AA	AA	BB	AA	AA	AA	BB	AA	AB	AA	AA	AB	AA	AA
2_195945348	BB	AA	BB	BB	AA	AA	BB	AA	BB	AA	AA	BB	BB	AA	BB	AA	AA	BB	AA	BB	AA	AB	AA	AA	AB	BB	BB	BB	AA	BB	BB	AA	BB	BB	BB	AA	AA	BB	AA	AA	AA	BB	AA	AB	AA	AA	AB	AA	AA
2_196401861	BB	AA	BB	BB	AA	AA	BB	AA	BB	AA	AA	BB	BB	AA	BB	AA	AA	BB	AA	BB	AA	AB	AA	AA	AB	BB	BB	BB	AA	BB	BB	AA	BB	BB	BB	AA	AA	BB	AA	AA	AA	BB	AA	AB	AA	AA	AB	AA	AA
2_196401891	BB	AA	BB	BB	AA	AA	BB	AA	BB	AA	AA	BB	BB	AA	BB	AA	AA	BB	AA	BB	AA	AB	AA	AA	AB	BB	BB	BB	AA	BB	BB	AA	BB	BB	BB	AA	AA	BB	AA	AA	AA	BB	AA	AB	AA	AA	AB	AA	AA
2_196446308	BB	AA	BB	BB	AA	AA	BB	AA	BB	AA	AA	BB	BB	AA	BB	AA	AA	BB	AA	BB	AA	AB	AA	AA	AB	BB	BB	BB	AA	BB	BB	AA	BB	BB	BB	AA	AA	BB	AA	AA	AA	BB	AA	AB	AA	AA	AB	AA	AA
2_196447502	BB	AA	BB	BB	AA	AA	BB	AA	BB	AA	AA	BB	BB	AA	BB	AA	AA	BB	AA	BB	AA	AB	AA	AA	AB	BB	BB	BB	AA	BB	BB	AA	BB	BB	BB	AA	AA	BB	AA	AA	AA	BB	AA	AB	AA	AA	AB	AA	AA
2_196800009	BB	AA	BB	BB	AA	AA	BB	AA	BB	AA	AA	BB	BB	AA	BB	AA	AA	BB	AA	BB	AA	AB	AA	AA	AB	BB	BB	BB	AA	BB	BB	AA	BB	BB	BB	AA	AA	BB	AA	AA	AA	BB	AA	AB	AA	AA	AB	AA	AA
2_196800031	BB	AA	BB	BB	AA	AA	BB	AA	BB	AA	AA	BB	BB	AA	BB	AA	AA	BB	AA	BB	AA	AB	AA	AA	AB	BB	BB	BB	AA	BB	BB	AA	BB	BB	BB	AA	AA	BB	AA	AA	AA	BB	AA	AB	AA	AA	AB	AA	AA
2_196800043	BB	AA	BB	BB	AA	AA	BB	AA	BB	AA	AA	BB	BB	AA	BB	AA	AA	BB	AA	BB	AA	AB	AA	AA	AB	BB	BB	BB	AA	BB	BB	AA	BB	BB	BB	AA	AA	BB	AA	AA	AA	BB	AA	AB	AA	AA	AB	AA	AA
2_196800070	BB	AA	BB	BB	AA	AA	BB	AA	BB	AA	AA	BB	BB	AA	BB	AA	AA	BB	AA	BB	AA	AB	AA	AA	AB	BB	BB	BB	AA	BB	BB	AA	BB	BB	BB	AA	AA	BB	AA	AA	AA	BB	AA	AB	AA	AA	AB	AA	AA
2_196800087	BB	AA	BB	BB	AA	AA	BB	AA	BB	AA	AA	BB	BB	AA	BB	AA	AA	BB	AA	BB	AA	AB	AA	AA	AB	BB	BB	BB	AA	BB	BB	AA	BB	BB	BB	AA	AA	BB	AA	AA	AA	BB	AA	AB	AA	AA	AB	AA	AA
2_196872042	BB	AA	BB	BB	AA	AA	BB	AA	BB	AA	AA	BB	BB	AA	BB	AA	AA	BB	AA	BB	AA	AB	AA	AA	AB	BB	BB	BB	AA	BB	BB	AA	BB	BB	BB	AA	AA	BB	AA	AA	AA	BB	AA	AB	AA	AA	AB	AA	AA
2_196872044	BB	AA	BB	BB	AA	AA	BB	AA	BB	AA	AA	BB	BB	AA	BB	AA	AA	BB	AA	BB	AA	AB	AA	AA	AB	BB	BB	BB	AA	BB	BB	AA	BB	BB	BB	AA	AA	BB	AA	AA	AA	BB	AA	AB	AA	AA	AB	AA	AA
2_197082782	BB	AA	BB	BB	AA	AA	BB	AA	BB	AA	AA	BB	BB	AA	BB	AA	AA	BB	AA	BB	AA	AB	AA	AA	AB	BB	BB	BB	AA	BB	BB	AA	BB	BB	BB	AA	AA	BB	AA	AA	AA	BB	AA	AB	AA	AA	AB	AA	AA
2_197555480	BB	AA	BB	BB	AA	AA	BB	AA	BB	AA	AA	BB	BB	AA	BB	AA	AA	BB	AA	BB	AA	AB	AA	AA	AB	BB	BB	BB	AA	BB	BB	AA	BB	BB	BB	AA	AA	BB	AA	AA	AA	BB	AA	AB	AA	AA	AB	AA	AA
2_197556671	BB	AA	BB	BB	AA	AA	BB	AB	BB	AA	AA	BB	BB	AA	BB	AA	AA	BB	AA	BB	AA	AB	AA	AA	AB	BB	BB	BB	AA	BB	BB	AA	BB	BB	BB	AA	AA	BB	AA	AA	AA	BB	AA	AB	AA	AA	AB	AA	AA
2_198325243	BB	AA	BB	BB	AA	AA	BB	AA	BB	AA	AA	BB	BB	AA	BB	AA	AA	BB	AA	BB	AA	AB	AA	AA	AB	BB	BB	BB	AA	BB	BB	AA	BB	BB	BB	AA	BB	BB	AA	AA	AA	BB	AA	AB	AA	AA	AB	AA	AA
2_198664235	BB	AA	BB	BB	AA	AA	BB	AA	BB	AA	AA	BB	BB	AA	AA	AA	AA	BB	AA	BB	AA	AB	AA	AA	AB	BB	BB	BB	AA	BB	BB	AA	BB	BB	BB	AA	BB	BB	AA	AA	AA	BB	AA	AB	AA	AA	AB	AA	AA
2_198757365	BB	AA	BB	BB	AA	AA	BB	AA	BB	AA	AA	BB	BB	AA	AA	AA	AA	BB	AA	BB	AA	AB	AA	AA	AB	BB	BB	BB	AA	BB	BB	AA	BB	BB	BB	AA	BB	BB	AA	AA	AA	BB	AA	AB	AA	AA	AB	AA	AA
2_201286181	BB	AA	BB	BB	AA	AA	BB	AA	AB	AA	AA	AA	BB	AA	AA	AA	AA	BB	AA	BB	AA	AB	AA	AA	AB	AA	BB	BB	BB	BB	BB	AA	BB	BB	BB	AA	AB	BB	AA	AA	AA	BB	AA	AB	AA	AA	AB	AA	AA
2_201488571	BB	AA	BB	BB	AA	AA	BB	AA	AB	AA	AA	AA	BB	AA	AA	AA	AA	BB	AA	BB	AA	AB	AA	AA	AB	AA	BB	BB	BB	BB	BB	AA	BB	BB	BB	AA	AB	BB	AA	AA	AA	BB	AA	AB	AA	AA	AB	AA	AA
2_201488601	BB	AA	BB	BB	AA	AA	BB	AA	AB	AA	AA	AA	BB	AA	AA	AA	AA	BB	AA	BB	AA	AB	AA	AA	AB	AA	BB	BB	BB	BB	BB	AA	BB	BB	BB	AA	AB	BB	AA	AA	AA	BB	AA	AB	AA	AA	AB	AA	AA
2_202632968	BB	AA	BB	BB	AA	AA	BB	AA	AB	AA	AA	AA	BB	AA	AA	AA	AA	BB	AA	BB	AA	AB	AA	AA	AB	AA	BB	BB	BB	BB	BB	AA	BB	BB	BB	AA	AB	BB	AA	AA	AA	BB	AA	AB	AA	AA	AB	AA	AA
2_203283077	BB	AA	BB	BB	AA	AA	BB	AA	AB	AA	AA	AA	BB	AA	AA	AA	AA	BB	AA	BB	AA	AB	AA	AA	AB	AA	BB	BB	BB	BB	BB	AA	BB	BB	BB	AA	AB	BB	AA	AA	AA	BB	AA	AB	AA	AA	AB	AA	AA
2_204158851	BB	AA	BB	BB	AA	AA	BB	AA	AB	AA	AA	AA	BB	AA	AA	AA	AA	BB	AA	BB	AA	AB	AA	-	AB	AA	BB	BB	BB	BB	BB	AA	BB	BB	BB	AA	AB	BB	AA	AA	AA	BB	AA	AB	AA	AA	BB	AA	AA
2_204158890	BB	AA	BB	BB	AA	AA	BB	AA	AB	AA	AA	AA	BB	AA	AA	AA	AA	BB	AA	BB	AA	AB	AA	-	AB	AA	BB	BB	BB	BB	BB	AA	BB	BB	BB	AA	AB	BB	AA	AA	AA	BB	AA	AB	AA	AA	BB	AA	AA
2_211021668	BB	AA	BB	BB	AB	AA	BB	AA	AA	AA	AA	AA	BB	AA	AA	AA	AA	BB	AA	AA	AA	AB	AA	AA	AB	AA	BB	BB	BB	BB	BB	AA	BB	BB	BB	AA	BB	BB	AA	AA	AA	AB	AA	BB	AA	AA	BB	AA	AA
2_212397098	BB	AA	BB	BB	AB	AA	BB	AA	AA	AA	AA	AA	BB	AA	AA	AA	AA	BB	AA	AA	AA	AB	AA	AA	AB	AA	BB	BB	BB	BB	BB	AA	BB	BB	BB	AA	BB	BB	AA	AA	AA	AB	AA	BB	AA	AA	BB	AA	AA
2_212397143	BB	AA	BB	BB	AB	AA	BB	AA	AA	AA	AA	AA	BB	AA	AA	AA	AA	BB	AA	AA	AA	AB	AA	AA	AB	AA	BB	BB	BB	BB	BB	AA	BB	BB	BB	AA	BB	BB	AA	AA	AA	AB	AA	BB	AA	AA	BB	AA	AA
2_212459094	BB	AA	BB	BB	AB	AA	BB	AA	AA	AA	AA	AA	BB	AA	AA	AA	AA	BB	AA	AA	AA	AB	AA	AA	AB	AA	BB	BB	BB	BB	BB	AA	BB	BB	BB	AA	BB	BB	AA	AA	AA	AB	AA	BB	AA	AA	BB	AA	AA
2_213639174	BB	AA	BB	BB	AB	AA	BB	AA	AA	AA	AA	AA	BB	AA	AA	AA	AA	BB	AA	AA	AA	AB	AA	AA	AB	AA	BB	BB	BB	BB	BB	AA	BB	BB	BB	AA	BB	BB	AA	AA	AA	AB	AA	BB	AA	AA	BB	AA	AA
2_214584040	BB	AA	BB	BB	AB	AA	BB	AA	AA	AA	AA	AA	BB	AA	AA	AA	AA	BB	AA	AA	AA	AB	AA	AA	AB	AA	BB	BB	BB	BB	BB	AA	BB	BB	BB	AA	BB	BB	AA	AA	AA	AB	AA	BB	AA	AA	BB	AA	AA
3_1786598	AA	BB	AA	AA	AA	BB	BB	AA	AB	BB	BB	BB	BB	AA	AA	BB	BB	BB	AA	AA	BB	AA	AA	AA	BB	BB	AA	BB	AA	BB	AA	AA	AA	BB	BB	AB	BB	AA	BB	AA	BB	AA	AA	AA	BB	AA	AA	AA	AA
3_11746499	AA	BB	AA	AA	AA	BB	BB	BB	AB	BB	BB	BB	BB	AA	AA	BB	BB	BB	AA	AA	BB	AA	AA	BB	BB	AA	AA	BB	AA	BB	AA	AA	AA	BB	BB	AB	BB	AA	BB	AA	BB	AA	AA	-	BB	AA	AA	BB	AA
3_11746550	AA	BB	AA	AA	AA	BB	BB	BB	AB	BB	BB	BB	BB	AA	AA	BB	BB	BB	AA	AA	BB	AA	AA	BB	BB	AA	AA	BB	AA	BB	AA	AA	AA	BB	BB	AB	BB	AA	BB	AA	BB	AA	AA	-	BB	AA	AA	BB	AA
3_14799425	AA	AA	AA	AA	AA	BB	BB	BB	BB	BB	BB	BB	BB	AA	AA	BB	BB	BB	AA	AA	BB	AA	AA	BB	BB	AA	AA	BB	AA	BB	AA	AA	AA	BB	BB	AA	BB	AA	BB	AA	BB	AA	AA	AA	BB	AA	AA	BB	AA
3_14800350	AA	AA	AA	AA	AA	BB	BB	BB	BB	BB	BB	BB	BB	AA	AA	BB	BB	BB	AA	AA	BB	AA	AA	BB	BB	AA	AA	BB	AA	BB	AA	AA	AA	BB	BB	AB	BB	AA	BB	AA	BB	AA	AA	AA	BB	AA	AA	BB	-
3_14800377	AA	AA	AA	AA	AA	BB	BB	BB	BB	BB	BB	BB	BB	AA	AA	BB	BB	BB	AA	AA	BB	AA	AA	BB	BB	AA	AA	BB	AA	BB	AA	AA	AA	BB	BB	AB	BB	AA	BB	AA	BB	AA	AA	AA	BB	AA	AA	BB	-
3_14800416	AA	AA	AA	AA	AA	BB	BB	BB	BB	BB	BB	BB	BB	AA	AA	BB	BB	BB	AA	AA	BB	AA	AA	BB	BB	AA	AA	BB	AA	BB	AA	AA	AA	BB	BB	AB	BB	AA	BB	AA	BB	AA	AA	AA	BB	AA	AA	BB	-
3_14800440	AA	AA	AA	AA	AA	BB	BB	BB	BB	BB	BB	BB	BB	AA	AA	BB	BB	BB	AA	AA	BB	AA	AA	BB	BB	AA	AA	BB	AA	BB	AA	AA	AA	BB	BB	AB	BB	AA	BB	AA	BB	AA	AA	AA	BB	AA	AA	BB	-
3_18402014	AA	AA	AA	AA	AA	BB	BB	BB	BB	BB	BB	BB	BB	AA	AA	AA	BB	BB	AA	AA	BB	AA	AA	BB	BB	AA	AA	BB	AA	BB	AA	BB	AA	BB	BB	AB	BB	AA	BB	AB	BB	AA	AA	AB	BB	AA	AA	BB	AA
3_18467193	AA	AA	AA	AA	AA	BB	BB	BB	BB	BB	BB	BB	BB	AA	AA	AA	BB	BB	AA	AA	BB	AA	AA	BB	BB	AA	AA	BB	AA	BB	AA	BB	AA	BB	BB	AB	BB	AA	BB	AB	BB	AA	AA	AB	BB	AA	AA	BB	AA
3_18467200	AA	AA	AA	AA	AA	BB	BB	BB	BB	BB	BB	BB	BB	AA	AA	AA	BB	BB	AA	AA	BB	AA	AA	BB	BB	AA	AA	BB	AA	BB	AA	BB	AA	BB	BB	AB	BB	AA	BB	AB	BB	AA	AA	AB	BB	AA	AA	BB	AA
3_18467229	AA	AA	AA	AA	AA	BB	BB	BB	BB	BB	BB	BB	BB	AA	AA	AA	BB	BB	AA	AA	BB	AA	AA	BB	BB	AA	AA	BB	AA	BB	AA	BB	AA	BB	BB	AB	BB	AA	BB	AB	BB	AA	AA	AB	BB	AA	AA	BB	AA
3_18467246	AA	AA	AA	AA	AA	BB	BB	BB	BB	BB	BB	BB	BB	AA	AA	AA	BB	BB	AA	AA	BB	AA	AA	BB	BB	AA	AA	BB	AA	BB	AA	BB	AA	BB	BB	AB	BB	AA	BB	AB	BB	AA	AA	AB	BB	AA	AA	BB	AA
3_18497343	AA	AA	AA	AA	AA	BB	BB	BB	BB	BB	BB	BB	BB	AA	AA	AA	BB	BB	AA	AA	BB	AA	AA	BB	BB	AA	AA	BB	AA	BB	AA	BB	AA	BB	BB	AB	BB	AA	BB	AB	BB	AA	AA	AB	BB	AA	AA	BB	AA
3_18497389	AA	AA	AB	AA	AA	AB	AB	-	BB	BB	AB	BB	AB	AA	AA	AA	AB	BB	AA	AA	AB	AA	AA	AB	BB	AA	AA	BB	AA	AB	AA	AB	AA	AB	BB	AB	BB	AA	BB	AA	AB	AA	AA	AB	AB	AA	AA	AB	AA
3_30147942	AA	BB	AA	AA	AA	BB	BB	BB	BB	BB	BB	AA	BB	AA	AA	AA	BB	BB	AA	AA	BB	AA	BB	BB	BB	BB	AA	BB	AB	AA	AB	BB	AA	BB	BB	AB	BB	AA	BB	AB	AA	AA	AA	AB	BB	AA	AA	BB	AA
3_36218558	BB	BB	BB	AA	AA	BB	BB	BB	BB	BB	BB	AA	BB	BB	AA	AA	BB	BB	BB	AA	BB	AA	BB	BB	BB	BB	AA	BB	-	AA	BB	BB	AA	BB	BB	AB	BB	AA	AA	AB	AA	AA	AA	BB	BB	AA	AA	BB	AA
3_36236472	BB	BB	BB	AA	AA	BB	BB	BB	BB	BB	BB	AA	BB	BB	AA	AA	BB	AB	BB	AA	BB	AA	BB	BB	BB	BB	AA	BB	AA	AA	BB	BB	AA	BB	BB	AB	BB	AA	AA	AB	AA	AA	AA	-	BB	AA	AA	BB	AA
3_38048966	BB	BB	BB	AA	AA	BB	BB	BB	BB	BB	BB	AA	BB	BB	AA	AA	BB	BB	BB	AA	BB	AA	BB	BB	BB	BB	AA	BB	AA	AA	BB	BB	BB	BB	BB	AB	BB	AA	AA	AB	AA	AA	AA	BB	BB	AA	AA	BB	-
3_42357655	BB	AA	BB	AB	AA	BB	BB	BB	BB	BB	BB	AA	BB	BB	AA	BB	BB	BB	BB	AA	BB	AA	BB	BB	BB	BB	AA	BB	AA	AA	BB	BB	BB	BB	BB	AB	BB	AA	AA	BB	AA	AA	AA	BB	BB	AA	BB	BB	AA
3_43080605	BB	AA	BB	AB	AA	BB	BB	BB	AA	BB	BB	AA	BB	BB	AA	BB	AA	BB	BB	AB	BB	AA	BB	BB	BB	BB	AA	BB	AA	AA	BB	BB	BB	BB	BB	AB	BB	AB	AA	BB	AA	AA	AA	BB	BB	AA	BB	BB	AA
3_45380398	AA	AA	AA	AB	AA	BB	BB	BB	AA	BB	BB	AB	BB	BB	AA	BB	AA	BB	BB	AB	BB	AA	BB	BB	BB	BB	AA	BB	AA	AA	BB	AA	BB	BB	BB	AB	BB	AB	AA	BB	AA	AA	AA	BB	BB	AA	BB	AA	AA
3_45415770	AA	AA	AA	AB	AA	BB	BB	BB	AA	BB	BB	AB	BB	BB	AA	BB	AA	BB	BB	AB	BB	AA	BB	BB	BB	BB	AA	BB	AA	AA	BB	AA	BB	BB	BB	AB	BB	AB	AA	BB	AA	AA	AA	BB	BB	AA	BB	AA	AA
3_45484605	AA	AA	AA	AB	AA	BB	BB	BB	AA	BB	BB	AB	BB	BB	AA	BB	AA	BB	BB	AB	BB	AA	BB	BB	BB	BB	AA	BB	AA	AA	BB	AA	BB	BB	BB	AB	BB	AB	AA	BB	AA	AA	AA	-	BB	AA	BB	AA	AA
3_45485788	AA	AA	AA	AB	AA	BB	BB	BB	AA	BB	BB	AB	BB	BB	AA	BB	AA	BB	BB	AB	BB	AA	BB	BB	BB	BB	AA	BB	AA	AA	BB	AA	BB	BB	BB	AB	BB	AB	AA	BB	AA	AA	AA	BB	BB	AA	BB	AA	AA
3_45933788	AA	AA	AA	AB	AA	BB	BB	BB	AA	BB	BB	AB	BB	BB	AA	BB	AA	BB	BB	AB	BB	AA	BB	BB	BB	BB	AA	BB	AA	AA	BB	AA	BB	BB	BB	AB	BB	AB	AA	BB	AA	AA	AA	-	BB	AA	BB	AA	-
3_45933796	AA	AA	AA	AB	AA	BB	BB	BB	AA	BB	BB	AB	BB	BB	AA	BB	AA	BB	BB	AB	BB	AA	BB	BB	BB	BB	AA	BB	AA	AA	BB	AA	BB	BB	BB	AB	BB	AB	AA	BB	AA	AA	AA	-	BB	AA	BB	AA	-
3_45954652	AA	AA	AA	AB	AA	BB	BB	BB	AA	BB	BB	AB	BB	BB	AA	BB	AA	BB	BB	AB	BB	AA	BB	BB	BB	BB	AA	BB	AA	AA	BB	AA	BB	BB	BB	AB	BB	BB	AA	BB	AA	AA	AA	BB	BB	AA	BB	AA	AA
3_46630105	AA	AA	AA	BB	AA	BB	BB	BB	AA	BB	BB	AB	BB	BB	AA	BB	AA	BB	BB	BB	BB	AA	BB	BB	BB	BB	AA	BB	AA	AA	BB	AA	BB	BB	BB	AB	BB	AB	AA	BB	AA	AA	AA	BB	BB	AB	BB	-	AA
3_46841639	AA	AA	AA	BB	AA	BB	BB	BB	AA	BB	BB	AB	BB	BB	AA	BB	AA	BB	BB	AB	BB	AA	BB	BB	BB	BB	AA	BB	AA	AA	BB	AA	BB	BB	BB	AB	BB	AB	AA	BB	BB	AA	AA	BB	BB	AA	BB	AA	AA
3_47115157	AA	AA	AA	BB	AA	BB	BB	BB	AA	BB	BB	AB	BB	BB	AA	BB	AA	BB	BB	AB	BB	AA	BB	BB	BB	BB	AA	BB	AA	AA	BB	AA	BB	BB	BB	AB	BB	AB	AA	BB	BB	AA	AA	BB	BB	AA	BB	AA	AA
3_47124411	AA	AA	AA	BB	AA	BB	BB	BB	AA	BB	BB	AB	BB	BB	AA	BB	AA	BB	BB	AB	BB	AA	BB	BB	BB	BB	AA	BB	AA	AA	BB	AA	BB	BB	BB	AB	BB	AB	AA	BB	BB	AA	AA	BB	BB	AA	BB	AA	AA
3_47788903	AA	AA	AA	BB	AA	BB	BB	BB	AA	BB	BB	AB	BB	BB	AA	BB	AA	BB	BB	AB	BB	AA	BB	BB	BB	BB	AA	BB	AA	AA	BB	AA	BB	BB	BB	AB	BB	AB	AA	BB	BB	AA	AA	BB	BB	AA	BB	AA	AA
3_48029807	AA	AA	AA	BB	AA	BB	BB	BB	AA	BB	BB	AB	BB	BB	AA	BB	AA	BB	BB	AB	BB	AA	BB	BB	BB	BB	AA	BB	AA	AA	BB	AA	BB	BB	BB	AB	BB	AB	AA	BB	BB	AA	AA	BB	BB	AA	BB	AA	AA
3_48031171	AA	AA	AA	BB	AA	BB	BB	BB	AA	BB	BB	AB	BB	BB	AA	BB	AA	BB	BB	AB	BB	AA	BB	BB	BB	BB	AA	BB	AA	AA	BB	AA	BB	BB	BB	AB	BB	AB	AA	BB	BB	AA	AA	BB	BB	AA	BB	AA	AA
3_58875149	AA	AA	AA	BB	BB	BB	BB	BB	AA	BB	BB	AB	BB	BB	AA	BB	AA	BB	BB	AB	BB	AA	BB	BB	BB	BB	AA	BB	AA	BB	BB	AA	BB	BB	BB	AB	BB	BB	BB	BB	BB	AA	AA	BB	AA	AA	BB	AA	AA
3_68720502	AA	AA	AA	BB	BB	BB	BB	BB	AA	BB	BB	AB	BB	BB	AA	BB	AA	BB	BB	AB	BB	AA	AA	BB	BB	BB	BB	BB	AA	BB	BB	AB	BB	BB	BB	AB	BB	AA	BB	BB	BB	AA	AA	BB	AA	AA	BB	AA	AA
3_68720547	AA	AA	AA	BB	BB	BB	BB	BB	AA	BB	BB	AB	BB	BB	AA	BB	AA	BB	BB	AB	BB	AA	AA	BB	BB	BB	BB	BB	AA	BB	BB	AB	BB	BB	BB	AB	BB	AA	BB	BB	BB	AA	AA	BB	AA	AA	BB	AA	AA
3_68722465	AA	AA	AA	BB	BB	BB	BB	BB	AA	BB	BB	AB	BB	BB	AA	BB	AA	BB	BB	AB	BB	AA	AA	BB	BB	BB	BB	BB	AA	BB	BB	AB	BB	BB	BB	AB	BB	AA	BB	BB	BB	AA	AA	BB	AA	AA	BB	AA	AA
3_69000445	AA	AA	AA	BB	BB	BB	BB	BB	AA	BB	BB	AB	BB	BB	AA	BB	AA	BB	BB	AB	BB	AA	AA	BB	BB	BB	BB	BB	AA	BB	BB	AB	BB	BB	BB	AA	BB	AA	BB	BB	BB	AA	AA	BB	AA	AA	BB	AA	AA
3_69000456	AA	AA	AA	BB	BB	BB	BB	BB	AA	BB	BB	AB	BB	BB	AA	BB	AA	BB	BB	AB	BB	AA	AA	BB	BB	BB	BB	BB	AA	BB	BB	AB	BB	BB	BB	AA	BB	AA	BB	BB	BB	AA	AA	BB	AA	AA	BB	AA	AA
3_72787710	AA	AA	AA	BB	BB	BB	BB	BB	AA	BB	AB	AB	BB	BB	AA	BB	AA	BB	BB	AB	BB	AB	AA	BB	BB	BB	BB	AA	AA	BB	AA	AA	BB	BB	BB	AA	BB	AA	BB	BB	BB	AA	AA	BB	AA	AA	BB	AA	AA
3_72787770	AA	AA	AA	BB	BB	BB	BB	BB	AA	BB	AB	AB	BB	BB	AA	BB	AA	BB	BB	AB	BB	AB	AA	BB	BB	BB	BB	AA	AA	BB	AA	AA	BB	BB	BB	AA	BB	AA	BB	BB	BB	AA	AA	BB	AA	AA	BB	AA	AA
3_72976084	AA	AA	AA	BB	BB	BB	BB	BB	AA	BB	-	AA	BB	BB	AA	BB	AA	BB	BB	AB	BB	AB	AA	BB	BB	BB	BB	AA	AA	BB	AA	AA	BB	BB	BB	AA	BB	AA	BB	BB	BB	AA	AA	BB	AA	AA	BB	AA	AA
3_77800857	AA	AA	AA	BB	BB	BB	BB	BB	AA	BB	AA	AB	BB	BB	AA	BB	AA	BB	BB	AB	BB	AB	AA	BB	BB	BB	BB	AA	AA	BB	AA	AA	BB	BB	BB	AA	BB	AA	BB	BB	BB	AA	AA	BB	AA	BB	BB	AA	AA
3_77936215	AA	AA	AA	BB	BB	BB	BB	BB	AA	BB	AA	AB	BB	BB	AA	BB	AA	BB	BB	AB	BB	AB	AA	BB	BB	BB	BB	AA	AA	BB	AA	AA	BB	BB	BB	AA	BB	AA	BB	BB	BB	AA	AA	BB	AA	BB	BB	AA	AA
3_80037989	AA	AA	AA	BB	BB	BB	BB	BB	AA	BB	AA	AB	BB	BB	AA	BB	AA	BB	BB	AB	BB	AB	BB	BB	BB	BB	BB	AA	AA	BB	AA	AA	BB	BB	BB	AA	BB	AA	BB	BB	BB	AA	AA	BB	AA	BB	BB	AA	AA
3_80194660	AA	AA	AA	BB	BB	BB	BB	BB	AA	BB	AA	AB	BB	BB	AA	BB	AA	BB	BB	AB	BB	AB	BB	BB	BB	BB	BB	AA	AA	BB	AA	AA	BB	BB	BB	AA	BB	AA	BB	BB	BB	AA	AA	-	AA	BB	BB	AA	AA
3_90532422	AA	AA	AA	BB	BB	BB	BB	BB	AA	BB	AA	AB	BB	BB	AA	BB	AA	BB	BB	AB	BB	AB	BB	BB	BB	AA	BB	AA	AA	BB	AA	AA	BB	BB	BB	AA	BB	BB	BB	BB	BB	AA	AA	BB	AA	BB	BB	AA	AA
3_90532566	AA	AA	AA	BB	BB	BB	BB	BB	AA	BB	AA	AB	BB	BB	AA	BB	AA	BB	BB	AB	BB	AB	BB	BB	BB	AA	BB	AA	AA	BB	AA	AA	BB	BB	BB	AA	BB	BB	BB	BB	BB	AA	AA	BB	AA	BB	BB	AA	AA
3_90873452	AA	AA	AA	BB	BB	BB	BB	BB	AA	BB	AA	AB	BB	BB	AA	BB	AA	BB	BB	AB	BB	AB	BB	BB	BB	AA	BB	AA	AA	BB	AA	AA	BB	BB	BB	AA	BB	BB	BB	BB	BB	AA	AA	BB	AA	BB	BB	AA	AA
3_93645622	AA	AA	AA	BB	BB	BB	BB	BB	AA	BB	AA	AA	BB	BB	AA	BB	AA	BB	BB	AA	BB	AB	BB	BB	BB	AA	BB	AA	AA	BB	AA	AA	BB	BB	BB	AA	BB	BB	BB	BB	-	AA	AA	BB	AA	BB	BB	AA	AA
3_100871277	AA	AA	AA	BB	BB	BB	BB	BB	AA	BB	AA	AA	AA	BB	AA	AA	BB	BB	BB	BB	BB	AA	AA	BB	BB	AA	BB	AA	AA	BB	AA	AA	BB	BB	BB	AA	BB	BB	BB	BB	BB	AA	AA	BB	AA	BB	BB	AA	AA
3_100871472	AA	AA	AA	BB	BB	BB	BB	BB	AA	BB	AA	AA	AA	BB	AA	AA	BB	BB	BB	BB	BB	AA	AA	BB	BB	AA	BB	AA	AA	BB	AA	AA	BB	BB	BB	AA	BB	BB	BB	BB	BB	AA	AA	BB	AA	BB	BB	AA	AA
3_102274562	AA	AA	AA	BB	BB	BB	BB	BB	AA	BB	AA	AA	AA	BB	AA	AA	BB	BB	BB	BB	BB	AA	AA	BB	BB	AA	BB	AA	AA	BB	AA	AA	BB	BB	BB	AA	BB	BB	BB	BB	BB	AA	AA	BB	AA	BB	BB	AA	AA
3_102735282	AA	AA	AA	BB	BB	BB	BB	BB	AA	BB	AA	AA	AA	BB	AA	AA	BB	BB	BB	BB	BB	AA	AA	BB	BB	AA	BB	AA	AA	BB	AA	AA	BB	BB	BB	AA	BB	BB	BB	BB	BB	AA	AA	BB	AA	BB	BB	AA	AA
3_112591639	AA	AA	AA	BB	BB	AB	BB	BB	AA	BB	AA	AA	AA	BB	AA	BB	BB	BB	BB	BB	AA	AA	AA	BB	BB	AA	BB	AA	AA	BB	AA	BB	BB	BB	BB	AA	BB	BB	BB	BB	BB	AA	BB	BB	AA	BB	BB	BB	AA
3_124870549	AA	AA	AA	BB	BB	AB	BB	BB	AA	BB	AA	AA	AA	AA	AA	BB	BB	BB	BB	BB	AA	BB	AA	BB	BB	AA	BB	AA	BB	BB	AA	BB	BB	BB	BB	AA	BB	BB	BB	BB	BB	AA	BB	BB	AA	AA	BB	BB	AA
3_126487051	AA	AA	AA	BB	BB	AA	BB	BB	AA	BB	AA	AA	AA	AA	AA	BB	BB	BB	BB	BB	AA	BB	AA	BB	BB	AA	BB	AA	BB	BB	AA	BB	BB	BB	BB	AA	BB	BB	BB	BB	BB	AA	BB	BB	AA	AA	BB	BB	AA
3_126487072	AA	AA	AA	BB	BB	AA	BB	BB	AA	BB	AA	AA	AA	AA	AA	BB	BB	BB	BB	BB	AA	BB	AA	BB	BB	AA	BB	AA	BB	BB	AA	BB	BB	BB	BB	AA	BB	BB	BB	BB	BB	AA	BB	BB	AA	AA	BB	BB	AA
3_126765391	AA	AA	AA	BB	BB	AA	BB	BB	AA	BB	AA	AA	AA	AA	AA	BB	BB	BB	BB	BB	AA	BB	AA	BB	BB	AA	BB	AA	BB	BB	AA	BB	BB	BB	BB	AA	BB	BB	BB	BB	BB	AA	BB	BB	AA	AA	BB	BB	AA
3_126765417	AA	AA	AA	BB	BB	AA	BB	BB	AA	BB	AA	AA	AA	AA	AA	BB	BB	BB	BB	BB	AA	BB	AA	BB	BB	AA	BB	AA	BB	BB	AA	BB	BB	BB	BB	AA	BB	BB	BB	BB	BB	AA	BB	BB	AA	AA	BB	BB	AA
3_127159381	AA	AA	AA	BB	BB	AA	BB	BB	AA	BB	-	AA	AA	AA	AA	BB	BB	BB	BB	BB	AA	BB	AA	BB	BB	AA	BB	AA	BB	BB	AA	BB	BB	BB	BB	AA	BB	BB	BB	BB	BB	AA	BB	BB	AA	AA	BB	BB	AA
3_127159389	AA	AA	AA	BB	BB	AA	BB	BB	AA	BB	-	AA	AA	AA	AA	BB	BB	BB	BB	BB	AA	BB	AA	BB	BB	AA	BB	AA	BB	BB	AA	BB	BB	BB	BB	AA	BB	BB	BB	BB	BB	AA	BB	BB	AA	AA	BB	BB	AA
3_127159448	AA	AA	AA	BB	BB	AA	BB	BB	AA	BB	-	AA	AA	AA	AA	BB	BB	BB	BB	BB	AA	BB	AA	BB	BB	AA	BB	AA	BB	BB	AA	BB	BB	BB	BB	AA	BB	BB	BB	BB	BB	AA	BB	BB	AA	AA	BB	BB	AA
3_129078617	AA	AA	AA	BB	BB	AA	BB	BB	AA	BB	AA	AA	AA	AA	AA	BB	BB	BB	BB	BB	AA	BB	AA	BB	BB	AA	BB	AA	BB	BB	AA	BB	BB	BB	BB	AA	BB	BB	BB	BB	BB	AA	BB	BB	AA	AA	BB	BB	AA
3_129266279	AA	AA	AA	BB	BB	AA	BB	BB	AA	BB	AA	AA	AA	AA	AA	BB	BB	BB	BB	BB	AA	BB	AA	BB	BB	AA	BB	AA	BB	BB	AA	BB	BB	BB	BB	AA	BB	BB	BB	BB	BB	AA	BB	BB	AA	AA	BB	BB	AA
3_129266284	AA	AA	AA	BB	BB	AA	BB	BB	AA	BB	AA	AA	AA	AA	AA	BB	BB	BB	BB	BB	AA	BB	AA	BB	BB	AA	BB	AA	BB	BB	AA	BB	BB	BB	BB	AA	BB	BB	BB	BB	BB	AA	BB	BB	AA	AA	BB	BB	AA
3_129711700	AA	AA	AA	BB	BB	AA	BB	BB	AA	BB	AA	AA	AA	AA	AA	BB	BB	BB	BB	BB	AA	BB	AA	BB	BB	AA	BB	AA	BB	BB	AA	BB	BB	BB	BB	AA	BB	BB	BB	BB	BB	AA	BB	BB	AA	AA	BB	BB	-
3_130987254	AA	AA	AA	BB	BB	AA	BB	BB	AA	BB	AA	AA	AA	AA	AA	BB	BB	BB	BB	BB	AA	BB	AA	BB	BB	AA	BB	AA	BB	BB	AA	BB	BB	BB	BB	AA	BB	BB	BB	BB	BB	AA	BB	BB	AA	AA	BB	BB	AA
3_142317341	AA	AA	AA	BB	BB	AA	AB	BB	AA	BB	AA	AA	AA	AA	BB	BB	BB	BB	AB	BB	AA	BB	AA	AB	AA	AA	BB	AA	AA	BB	BB	AB	BB	BB	BB	AA	BB	BB	BB	BB	BB	AA	BB	BB	AA	AA	BB	BB	AA
3_145987457	AA	AA	AA	BB	BB	AA	AB	BB	AA	BB	AA	AA	AA	AA	BB	BB	BB	BB	AB	BB	AA	BB	AA	AB	AA	AA	BB	AA	AA	BB	BB	AB	BB	BB	BB	AA	BB	BB	BB	BB	BB	AA	BB	BB	BB	AA	BB	BB	AA
3_146241534	AA	AA	AA	BB	BB	AA	AB	BB	AA	BB	AA	AA	AA	AA	BB	BB	BB	BB	AB	BB	AA	BB	AA	AB	AA	AA	BB	AA	AA	BB	BB	AB	BB	BB	BB	AA	BB	BB	BB	BB	BB	AA	BB	BB	BB	AA	BB	BB	AA
3_155436560	AA	AA	AA	BB	BB	AA	AB	BB	AA	BB	AA	AA	AA	BB	BB	BB	BB	BB	AA	BB	AA	BB	AA	BB	AA	BB	BB	AA	AA	BB	BB	AB	BB	BB	BB	AA	BB	BB	BB	BB	BB	AA	BB	BB	BB	AA	BB	BB	AA
3_155729432	AA	AA	AA	BB	BB	AA	AB	BB	AA	BB	AA	AA	AA	BB	BB	BB	BB	BB	AA	BB	AA	BB	AA	AB	AA	BB	BB	AA	AA	BB	BB	AB	BB	BB	BB	AA	BB	BB	BB	BB	BB	AA	BB	BB	BB	AA	BB	BB	AA
3_155729466	AA	AA	AA	BB	BB	AA	AB	BB	AA	BB	AA	AA	AA	BB	BB	BB	BB	BB	AA	BB	AA	BB	AA	AB	AA	BB	BB	AA	AA	BB	BB	AB	BB	BB	BB	AA	BB	BB	BB	BB	BB	AA	BB	BB	BB	AA	BB	BB	AA
3_155729496	AA	AA	AA	BB	BB	AA	AB	BB	AA	BB	AA	AA	AA	BB	BB	BB	BB	BB	AA	BB	AA	BB	AA	AB	AA	BB	BB	AA	AA	BB	BB	AB	BB	BB	BB	AA	BB	BB	BB	BB	BB	AA	BB	BB	BB	AA	BB	BB	AA
3_156475795	AA	AA	AA	BB	BB	AA	AB	BB	AA	BB	AA	AA	AA	BB	BB	BB	BB	BB	AA	BB	AA	BB	AA	AB	AA	BB	BB	AA	AA	BB	BB	AB	BB	BB	BB	AA	BB	BB	BB	BB	BB	AA	BB	BB	BB	AA	BB	BB	AA
3_156475984	AA	AA	AA	BB	BB	AA	AB	BB	AA	BB	AA	AA	AA	BB	BB	BB	BB	BB	AA	BB	AA	BB	AA	AB	AA	BB	BB	AA	AA	BB	BB	AB	BB	BB	BB	AA	BB	BB	BB	BB	BB	AA	BB	BB	BB	AA	BB	BB	AA
3_162150771	AA	AA	AA	BB	BB	AA	AB	BB	AA	BB	AA	AA	AA	BB	BB	BB	BB	BB	AA	BB	AA	BB	AA	AB	AA	BB	BB	AA	AA	BB	BB	BB	BB	BB	BB	AA	BB	BB	BB	BB	BB	AA	BB	BB	BB	AA	BB	BB	AA
3_164242545	AA	AA	AA	BB	BB	AA	AB	-	BB	BB	AA	AA	AA	BB	BB	BB	BB	BB	AA	BB	AA	BB	AA	AB	AA	BB	BB	AA	AA	BB	-	BB	BB	BB	BB	AA	BB	BB	BB	AA	BB	AA	BB	BB	BB	AA	BB	BB	-
3_164940839	AA	AA	AA	BB	BB	AA	AB	BB	BB	BB	AA	AA	AA	BB	BB	BB	BB	BB	AA	BB	AA	BB	AA	AB	AA	BB	BB	AA	AA	BB	BB	BB	BB	BB	BB	AA	BB	BB	BB	AA	BB	AA	BB	BB	BB	AA	BB	BB	AA
3_175017988	AA	AA	AA	-	AA	AA	AB	BB	BB	BB	AA	AA	AA	BB	BB	BB	AB	BB	AA	AA	AA	BB	BB	AA	AA	-	BB	BB	BB	AA	BB	BB	AA	AA	-	AA	BB	BB	BB	AA	BB	AA	BB	BB	BB	AA	AA	BB	BB
3_175018633	AA	AA	AA	BB	AA	AA	AB	BB	BB	BB	AA	AA	AA	BB	BB	BB	AB	BB	AA	AA	AA	BB	BB	AA	AA	BB	BB	BB	BB	AA	BB	BB	AA	AA	BB	AA	BB	BB	BB	AA	BB	AA	BB	BB	BB	AA	AA	BB	BB
3_178263888	AA	AA	AA	-	AA	AA	AB	BB	BB	BB	AA	AA	AA	BB	BB	BB	AB	BB	AA	AA	AA	BB	BB	AA	AA	BB	BB	BB	BB	AA	BB	BB	AA	AA	BB	AA	BB	BB	BB	AA	BB	AA	BB	BB	AA	AA	AA	BB	BB
3_191735603	BB	AA	AB	BB	AA	AA	AA	BB	AA	BB	AA	AA	AA	AA	BB	BB	AB	-	AA	BB	AA	BB	BB	AA	AA	BB	BB	BB	BB	AA	AB	AB	AB	AA	BB	AA	BB	AA	BB	AA	BB	AA	BB	-	AA	AA	AA	BB	BB
3_192867946	BB	AA	AB	BB	AA	AA	AA	BB	AA	BB	AA	AA	AA	AA	BB	BB	AB	BB	AA	BB	AA	BB	BB	AA	AA	BB	BB	BB	BB	AA	AB	AB	AB	AA	BB	AA	BB	AA	BB	AA	BB	AA	BB	BB	AA	AA	AA	BB	BB
3_192867948	BB	AA	AB	BB	AA	AA	AA	BB	AA	BB	AA	AA	AA	AA	BB	BB	AB	BB	AA	BB	AA	BB	BB	AA	AA	BB	BB	BB	BB	AA	AB	AB	AB	AA	BB	AA	BB	AA	BB	AA	BB	AA	BB	BB	AA	AA	AA	BB	BB
3_192868007	BB	AA	AB	BB	AA	AA	AA	BB	AA	BB	AA	AA	AA	AA	BB	BB	AB	BB	AA	BB	AA	BB	BB	AA	AA	BB	BB	BB	BB	AA	AB	AB	BB	AA	BB	AA	BB	AA	BB	AA	BB	AA	BB	BB	AA	AA	AA	BB	BB
3_193675047	BB	AA	AA	BB	AA	AA	AA	BB	AA	BB	AA	AA	AA	AA	BB	BB	AB	BB	AA	BB	AA	BB	BB	AA	AA	BB	BB	BB	BB	AA	AB	AB	AB	AA	BB	AA	BB	AA	BB	AA	BB	AA	BB	BB	AA	AA	AA	BB	BB
3_200770868	BB	AA	BB	BB	AA	AA	AA	BB	AA	BB	AA	AA	AA	AA	BB	BB	AB	BB	AA	BB	AA	BB	BB	AA	AA	BB	BB	BB	BB	AA	AB	AB	BB	AA	BB	AA	BB	AA	BB	AA	BB	AA	BB	BB	AA	AA	AA	BB	BB
3_202235591	BB	AA	BB	BB	AA	AA	AA	BB	AA	BB	AA	AA	AA	AA	BB	BB	AB	BB	AA	BB	AA	BB	BB	AA	AA	BB	BB	BB	BB	AA	AB	AB	BB	AA	BB	AA	BB	AA	BB	AA	BB	AA	BB	BB	AA	AA	AA	BB	BB
3_210934028	BB	AA	BB	BB	BB	AA	AA	BB	AA	BB	AA	AA	AA	AA	BB	BB	BB	BB	AA	BB	AA	BB	BB	AA	AA	BB	BB	BB	BB	AA	BB	AA	AA	AB	AA	AA	BB	AA	BB	AA	BB	AA	BB	BB	AA	AA	AA	BB	BB
3_211240267	BB	AA	BB	BB	BB	AA	AA	BB	AA	BB	AA	AA	AA	AA	BB	BB	BB	BB	AA	BB	AA	BB	BB	AA	AA	BB	BB	BB	BB	AA	BB	AA	AA	AB	AA	AA	BB	AA	BB	AA	BB	AA	BB	BB	AA	AA	AA	BB	BB
3_211240297	BB	AA	BB	BB	BB	AA	AA	BB	AA	BB	AA	AA	AA	AA	BB	BB	BB	BB	AA	BB	AA	BB	BB	AA	AA	BB	BB	BB	BB	AA	BB	AA	AA	AB	AA	AA	BB	AA	BB	AA	BB	AA	BB	BB	AA	AA	AA	BB	BB
3_211240311	BB	AA	BB	BB	BB	AA	AA	BB	AA	BB	AA	AA	AA	AA	BB	BB	BB	BB	AA	BB	AA	BB	BB	AA	AA	BB	BB	BB	BB	AA	BB	AA	AA	AB	AA	AA	BB	AA	BB	AA	BB	AA	BB	BB	AA	AA	AA	BB	BB
3_217978357	BB	AA	BB	BB	BB	BB	AA	BB	AA	BB	AA	AA	AA	AA	BB	BB	BB	BB	AA	AA	AA	BB	BB	AA	AA	BB	BB	BB	BB	AA	AA	AA	AA	AB	AA	AA	BB	AA	BB	AA	BB	BB	BB	BB	AB	AA	AA	BB	BB
3_217978416	BB	AA	BB	BB	BB	BB	AA	BB	AA	BB	AA	AA	AA	AA	BB	BB	BB	BB	AA	AA	AA	BB	BB	AA	AA	BB	BB	BB	BB	AA	AA	AA	AA	AB	AA	AA	BB	AA	BB	AA	BB	BB	BB	BB	AB	AA	AA	BB	BB
3_217978448	BB	AA	BB	BB	BB	BB	AA	BB	AA	BB	AA	AA	AA	AA	BB	BB	BB	BB	AA	AA	AA	BB	BB	AA	AA	BB	BB	BB	BB	AA	AA	AA	AA	AB	AA	AA	BB	AA	BB	AA	BB	BB	BB	BB	AB	AA	AA	BB	BB
3_217978468	BB	AA	BB	BB	BB	BB	AA	BB	AA	BB	AA	AA	AA	AA	BB	BB	BB	BB	AA	AA	AA	BB	BB	AA	AA	BB	BB	BB	BB	AA	AA	AA	AA	AB	AA	AA	BB	AA	BB	AA	BB	BB	BB	BB	AB	AA	AA	BB	BB
3_218094148	BB	AA	BB	BB	BB	BB	AA	BB	AA	BB	AA	AA	AA	AA	BB	BB	BB	BB	AA	AA	AA	BB	BB	AA	AA	BB	BB	BB	BB	AA	AA	AA	AA	AB	AA	AA	BB	AA	BB	AA	BB	BB	BB	BB	BB	AA	AA	BB	BB
3_218094222	BB	AA	BB	BB	BB	BB	AA	BB	AA	BB	AA	AA	AA	AA	BB	BB	BB	BB	AA	AA	AA	BB	BB	AA	AB	BB	BB	BB	BB	AA	AA	AA	AA	AB	AA	AA	BB	AA	BB	AA	BB	BB	BB	BB	BB	AA	AA	BB	BB
3_221330361	AA	AA	AA	BB	BB	BB	AA	BB	BB	BB	AA	AA	AA	AA	AA	BB	BB	BB	AA	AA	BB	BB	BB	AA	BB	BB	BB	BB	BB	AA	AA	AA	AA	AB	AA	AA	BB	AA	BB	AA	AA	BB	BB	BB	AB	AA	AA	BB	BB
3_221331698	AA	AA	AA	BB	BB	BB	AA	BB	BB	BB	AA	AA	AA	AA	AA	BB	BB	BB	AA	AA	BB	BB	BB	AA	BB	BB	BB	BB	BB	AA	AA	AA	AA	AB	AA	AA	BB	AA	BB	AA	AA	BB	BB	BB	AB	AA	AA	BB	BB
3_225834896	AA	AA	AA	BB	BB	BB	AA	BB	BB	BB	AA	AA	AA	AA	AA	BB	BB	BB	AA	AA	BB	BB	BB	AA	BB	BB	BB	BB	BB	AA	AA	AA	AA	AB	AA	AA	BB	AA	BB	AA	AA	BB	BB	BB	AB	AA	AA	BB	BB
3_226553483	AA	AA	AA	BB	BB	BB	AA	BB	BB	BB	AA	AA	AA	AA	AA	BB	BB	BB	AA	AA	BB	BB	BB	AA	BB	BB	BB	BB	BB	AA	AA	AA	AA	AB	AA	AA	BB	AA	BB	AA	AA	BB	BB	BB	AB	AA	AA	BB	BB
3_236264714	AA	AA	AA	BB	BB	BB	AA	BB	BB	BB	AA	AA	AA	AA	AA	BB	BB	BB	AA	AA	BB	BB	BB	AA	BB	BB	BB	BB	BB	AA	AA	AA	AA	AB	AA	AA	BB	AA	BB	AA	AA	BB	BB	BB	AA	AA	BB	BB	BB
3_237753373	BB	AA	BB	BB	BB	BB	AA	BB	BB	BB	AA	AA	AA	AA	AA	BB	BB	BB	AA	AA	BB	BB	BB	AA	BB	BB	BB	BB	BB	AA	AA	AA	AA	AB	AA	AA	BB	AA	BB	AA	AA	BB	BB	BB	AA	AA	BB	BB	BB
3_237753562	AA	AA	AA	BB	BB	BB	AA	BB	BB	BB	AA	AA	AA	AA	AA	BB	BB	BB	AA	AA	BB	BB	BB	AA	BB	BB	BB	BB	BB	AA	AA	AA	AA	AB	AA	AA	BB	AA	BB	AA	AA	BB	BB	BB	AA	AA	BB	BB	BB
3_238971028	AA	AA	-	BB	BB	BB	AA	BB	BB	BB	AA	AA	AA	BB	AA	BB	BB	BB	AA	AA	BB	BB	BB	AA	BB	BB	BB	BB	BB	AA	AA	AA	AA	AB	AA	AA	BB	AA	BB	AA	AA	BB	BB	BB	AA	AA	BB	BB	BB
3_238971031	AA	AA	-	BB	BB	BB	AA	BB	BB	BB	AA	AA	AA	BB	AA	BB	BB	BB	AA	AA	BB	BB	BB	AA	BB	BB	BB	BB	BB	AA	AA	AA	AA	AB	AA	AA	BB	AA	BB	AA	AA	BB	BB	BB	AA	AA	BB	BB	BB
3_247432121	AA	AA	AA	BB	BB	BB	AA	BB	BB	BB	AA	AA	AA	BB	AA	BB	BB	BB	AA	AA	BB	BB	BB	AA	BB	BB	BB	BB	BB	AA	AA	AA	AA	AA	AA	AA	BB	AA	BB	BB	AA	BB	BB	BB	AA	AA	BB	BB	BB
3_247432150	AA	AA	AA	BB	BB	BB	AA	BB	BB	BB	AA	AA	AA	BB	AA	BB	BB	BB	AA	AA	BB	BB	BB	AA	BB	BB	BB	BB	BB	AA	AA	AA	AA	AA	AA	AA	BB	AA	BB	BB	AA	BB	BB	BB	AA	AA	BB	BB	BB
3_247432189	AA	AA	AA	BB	BB	BB	AA	BB	BB	BB	AA	AA	AA	BB	AA	BB	BB	BB	AA	AA	BB	BB	BB	AA	BB	BB	BB	BB	BB	AA	AA	AA	AA	AA	AA	AA	BB	AA	BB	BB	AA	BB	BB	BB	AA	AA	BB	BB	BB
3_247565513	AA	AA	AA	BB	BB	BB	AA	BB	BB	BB	AA	AA	AA	BB	AA	BB	BB	BB	AA	AA	BB	BB	BB	AA	BB	BB	BB	BB	BB	AA	AA	AA	AA	AA	AA	AA	BB	AA	BB	AB	AA	BB	BB	BB	AA	AA	BB	BB	BB
3_247565514	AA	AA	AA	BB	BB	BB	AA	BB	BB	BB	AA	AA	AA	BB	AA	BB	BB	BB	AA	AA	BB	BB	BB	AA	BB	BB	BB	BB	BB	AA	AA	AA	AA	AA	AA	AA	BB	AA	BB	AB	AA	BB	BB	BB	AA	AA	BB	BB	BB
4_7422798	AA	BB	AA	BB	BB	AA	AA	BB	BB	BB	BB	AA	BB	AA	AA	BB	BB	BB	BB	AA	BB	AA	BB	BB	BB	BB	BB	AA	AA	BB	AA	BB	AA	AA	AA	BB	AA	AA	BB	AA	BB	AA	BB	BB	BB	BB	AA	BB	AA
4_7422828	AA	BB	AA	BB	BB	AA	AA	BB	BB	BB	BB	AA	BB	AA	AA	BB	BB	BB	BB	AA	BB	AA	BB	BB	BB	BB	BB	AA	AA	BB	AA	BB	AA	AA	AA	BB	AA	AA	BB	AA	BB	AA	BB	BB	BB	BB	AA	BB	AA
4_13070267	AA	BB	AA	BB	BB	AA	AA	BB	BB	BB	BB	AA	BB	AA	AA	BB	BB	BB	BB	AA	BB	AA	BB	BB	BB	BB	BB	AA	AA	BB	AA	BB	AA	AA	AA	BB	BB	AA	BB	AA	BB	AA	BB	BB	BB	BB	BB	BB	AA
4_13192476	AA	BB	AA	BB	BB	AA	AA	BB	BB	BB	BB	AA	BB	AA	AA	BB	BB	BB	BB	AA	BB	AA	BB	BB	BB	BB	BB	AA	AA	BB	AA	BB	AA	AA	AA	BB	BB	AA	BB	AA	BB	AA	BB	BB	BB	BB	BB	BB	AA
4_13195787	AA	BB	AA	BB	BB	AA	AA	BB	BB	BB	BB	AA	BB	AA	AA	BB	BB	BB	BB	AA	BB	AA	BB	BB	BB	BB	BB	AA	AA	BB	AA	BB	AA	AA	AA	BB	BB	AA	BB	AA	BB	AA	BB	-	BB	BB	BB	BB	AA
4_16483780	AA	BB	AA	BB	BB	AA	AA	BB	BB	BB	BB	AA	BB	AA	AA	AA	BB	BB	BB	AA	BB	AA	BB	BB	BB	BB	BB	AB	AB	BB	AA	BB	AA	AA	AB	BB	BB	AA	BB	AB	BB	AA	BB	BB	BB	BB	BB	BB	AB
4_17088165	AA	BB	AA	BB	BB	AA	AA	BB	BB	BB	BB	AA	BB	AA	AA	AA	BB	BB	BB	AA	BB	AA	BB	BB	BB	BB	BB	AA	AA	BB	AA	BB	AB	AA	AA	BB	BB	AA	BB	AA	BB	AA	BB	BB	BB	BB	BB	BB	AA
4_17997256	AA	BB	AA	BB	BB	AA	AA	BB	BB	BB	BB	AA	BB	AA	AA	AA	BB	BB	BB	AA	BB	AA	BB	BB	BB	BB	BB	AA	AA	BB	AA	BB	AA	AA	AA	BB	BB	AA	BB	AA	BB	AA	BB	BB	BB	BB	BB	BB	AA
4_19742265	AA	BB	AA	BB	BB	AA	AA	BB	BB	BB	BB	AA	BB	AA	AA	AA	BB	BB	BB	AA	BB	AA	BB	BB	BB	BB	BB	AA	AA	BB	AA	BB	AA	AA	AA	BB	BB	AA	BB	AA	BB	AA	BB	BB	BB	BB	BB	BB	AA
4_20023408	AA	BB	AA	BB	BB	AA	AA	BB	BB	BB	BB	AA	-	AA	AA	AA	BB	BB	BB	AA	BB	AA	BB	BB	BB	BB	BB	AA	AA	BB	AA	BB	AA	AA	-	BB	BB	AA	BB	AA	BB	AA	BB	BB	BB	BB	BB	BB	AA
4_21906949	AA	BB	AA	BB	BB	AA	AA	BB	BB	BB	BB	AA	BB	AA	AA	AA	BB	BB	BB	BB	BB	AA	BB	BB	BB	BB	BB	AA	AA	BB	AA	BB	AA	AA	AA	BB	BB	AA	BB	AA	BB	AA	BB	BB	BB	BB	BB	BB	AA
4_22575146	AA	BB	AA	BB	BB	AA	AA	BB	BB	BB	BB	BB	BB	AA	AA	AA	BB	AA	BB	BB	BB	AA	BB	BB	BB	BB	BB	AA	AA	BB	AA	BB	AA	AA	AA	BB	BB	AA	BB	AA	BB	AA	BB	BB	BB	AB	BB	BB	AA
4_22670059	AA	BB	AA	BB	BB	AA	AA	BB	BB	BB	BB	BB	BB	AA	AA	AA	BB	AA	BB	BB	BB	AA	BB	BB	BB	BB	BB	AA	AA	BB	AA	BB	AA	AA	AA	BB	BB	AA	BB	AA	BB	AA	BB	BB	BB	BB	BB	BB	AA
4_22671496	AA	BB	AA	BB	BB	AA	AA	BB	BB	BB	BB	BB	BB	AA	AA	AA	BB	AA	BB	BB	BB	AA	BB	BB	BB	BB	BB	AA	AA	BB	AA	BB	AA	AA	AA	BB	BB	AA	BB	AA	BB	AA	BB	BB	BB	BB	BB	BB	-
4_22671628	AA	BB	AA	BB	BB	AA	AA	BB	BB	BB	BB	BB	BB	AA	AA	AA	BB	AA	BB	BB	BB	AA	BB	BB	BB	BB	BB	AA	AA	BB	AA	BB	AA	AA	AA	BB	BB	AA	BB	AA	BB	AA	BB	BB	BB	BB	BB	BB	AA
4_26904091	AA	BB	AA	BB	BB	AA	AA	BB	BB	BB	BB	BB	BB	AA	AA	AA	BB	AA	BB	BB	BB	AA	BB	BB	BB	BB	BB	AA	AA	BB	AA	BB	AA	AA	AA	BB	BB	AA	BB	AA	BB	AB	BB	BB	BB	BB	BB	BB	AA
4_26904170	AA	BB	AA	BB	BB	AA	AA	BB	BB	BB	BB	BB	BB	AA	AA	AA	BB	AA	BB	BB	BB	AA	BB	BB	BB	BB	BB	AA	AA	BB	AA	BB	AA	AA	AA	BB	BB	AA	BB	AA	BB	AB	BB	BB	BB	BB	BB	BB	AA
4_27028078	AA	BB	AA	BB	-	AA	AA	BB	BB	BB	BB	BB	BB	AA	AA	AA	BB	AA	BB	BB	BB	AA	BB	BB	BB	BB	BB	AA	AA	BB	AA	BB	AA	AA	AA	BB	BB	AA	BB	AA	BB	AB	BB	BB	BB	AB	BB	BB	AA
4_32080498	AA	BB	-	BB	BB	AA	AA	BB	BB	BB	BB	AA	BB	AA	AA	AA	BB	AA	BB	BB	BB	AA	BB	BB	BB	BB	BB	AA	AA	BB	AA	BB	AA	AA	AA	BB	BB	AA	BB	BB	BB	AA	BB	-	BB	BB	BB	BB	AA
4_32546849	AA	BB	-	BB	BB	AA	AA	BB	BB	BB	BB	AA	BB	AA	AA	AA	BB	AA	BB	BB	BB	AA	BB	BB	BB	BB	BB	AA	AA	BB	AA	BB	AA	AA	AA	BB	BB	AA	BB	BB	BB	AA	BB	BB	BB	BB	BB	BB	AA
4_32547065	AA	BB	AA	BB	BB	AA	AA	BB	BB	BB	BB	AA	BB	AA	AA	AA	BB	AA	BB	BB	BB	AA	BB	BB	BB	BB	BB	AA	AA	BB	AA	BB	AA	AA	AA	BB	BB	AA	BB	BB	BB	AA	BB	BB	BB	BB	BB	BB	AA
4_33515869	AA	BB	AA	BB	BB	AA	AA	BB	BB	BB	BB	AA	-	AA	AA	AA	BB	AA	BB	BB	BB	AA	-	BB	BB	BB	BB	AA	AA	BB	AA	BB	AA	AA	AA	BB	BB	AA	BB	BB	BB	AA	BB	BB	BB	BB	BB	BB	AA
4_34198489	AA	BB	-	BB	BB	AA	AA	BB	BB	BB	BB	AA	BB	AA	AA	AA	BB	AA	BB	BB	BB	AA	BB	BB	BB	BB	BB	AA	AA	BB	AA	BB	AA	AA	AA	BB	BB	AA	BB	BB	BB	AA	BB	BB	BB	BB	BB	BB	AA
4_35513149	AA	BB	AA	BB	BB	AA	AA	BB	BB	BB	BB	AA	BB	AA	AA	AA	BB	AA	BB	BB	BB	AA	BB	BB	BB	BB	BB	AA	AA	BB	AA	BB	AA	AA	AA	BB	BB	AA	BB	BB	BB	AA	BB	-	BB	BB	BB	BB	AA
4_35647379	AA	BB	AA	BB	BB	AA	AA	BB	BB	BB	BB	AA	BB	AA	AA	AA	BB	AA	BB	BB	BB	AA	BB	BB	BB	BB	BB	AA	AA	BB	AA	BB	AA	AA	AA	BB	BB	AA	BB	BB	BB	AA	BB	AA	BB	BB	BB	BB	AA
4_36119006	AA	BB	AA	BB	BB	AA	AA	BB	BB	BB	BB	AA	BB	AA	AA	AA	BB	AA	BB	BB	BB	AA	BB	BB	BB	BB	BB	AA	AA	BB	AA	BB	AA	AA	AA	BB	BB	AA	BB	BB	BB	AA	BB	AA	BB	BB	BB	BB	AA
4_36119041	AA	BB	AA	BB	BB	AA	AA	BB	BB	BB	BB	AA	BB	AA	AA	AA	BB	AA	BB	BB	BB	AA	BB	BB	BB	BB	BB	AA	AA	BB	AA	BB	AA	AA	AA	BB	BB	AA	BB	BB	BB	AA	BB	AA	BB	BB	BB	BB	AA
4_36138160	AA	BB	AA	BB	BB	AA	AA	BB	BB	BB	BB	AA	BB	AA	AA	AA	BB	AA	BB	BB	BB	AA	BB	BB	BB	BB	BB	AA	AA	BB	AA	BB	AA	AA	AA	BB	BB	AA	BB	BB	BB	AA	BB	-	BB	BB	BB	BB	-
4_36138198	AA	BB	AA	BB	BB	AA	AA	BB	BB	BB	BB	AA	BB	AA	AA	AA	BB	AA	BB	BB	BB	AA	BB	BB	BB	BB	BB	AA	AA	BB	AA	BB	AA	AA	AA	BB	BB	AA	BB	BB	BB	AA	BB	-	BB	BB	BB	BB	-
4_36138243	AA	BB	AA	BB	BB	AA	AA	BB	BB	BB	BB	AA	BB	AA	AA	AA	BB	AA	BB	BB	BB	AA	BB	BB	BB	BB	BB	AA	AA	BB	AA	BB	AA	AA	AA	BB	BB	AA	BB	BB	BB	AA	BB	-	BB	BB	BB	BB	-
4_36138246	AA	BB	AA	BB	BB	AA	AA	BB	BB	BB	BB	AA	BB	AA	AA	AA	BB	AA	BB	BB	BB	AA	BB	BB	BB	BB	BB	AA	AA	BB	AA	BB	AA	AA	AA	BB	BB	AA	BB	BB	BB	AA	BB	-	BB	BB	BB	BB	-
4_36138254	AA	BB	AA	BB	BB	AA	AA	BB	BB	BB	BB	AA	BB	AA	AA	AA	BB	AA	BB	BB	BB	AA	BB	BB	BB	BB	BB	AA	AA	BB	AA	BB	AA	AA	AA	BB	BB	AA	BB	BB	BB	AA	BB	-	BB	BB	BB	BB	-
4_36364926	AA	BB	AA	BB	BB	AA	AA	BB	BB	BB	BB	AA	BB	AA	AA	AA	BB	AA	BB	BB	-	AA	BB	BB	BB	BB	BB	AA	AA	BB	AA	BB	AA	AA	AA	BB	BB	AA	BB	BB	BB	AA	BB	AA	BB	BB	BB	BB	AA
4_36364927	AA	BB	AA	BB	BB	AA	AA	BB	BB	BB	BB	AA	BB	AA	AA	AA	BB	AA	BB	BB	-	AA	BB	BB	BB	BB	BB	AA	AA	BB	AA	BB	AA	AA	AA	BB	BB	AA	BB	BB	BB	AA	BB	AA	BB	BB	BB	BB	AA
4_36818895	AA	BB	AA	BB	BB	AA	AA	BB	BB	BB	BB	AA	BB	AA	AA	AA	BB	AA	BB	BB	BB	AA	BB	BB	BB	BB	BB	AA	AA	BB	AA	BB	AA	AA	AA	BB	BB	AA	BB	BB	BB	AA	BB	BB	BB	BB	BB	BB	AA
4_36860597	AA	BB	AA	BB	BB	AA	AA	BB	BB	BB	BB	AA	BB	AA	AA	AA	BB	AA	BB	BB	BB	AA	BB	BB	BB	BB	BB	AA	AA	BB	AA	BB	AA	AA	AA	BB	BB	AA	BB	BB	BB	AA	BB	BB	BB	BB	BB	BB	AA
4_36860618	AA	BB	AA	BB	BB	AA	AA	BB	BB	BB	BB	AA	BB	AA	AA	AA	BB	AA	BB	BB	BB	AA	BB	BB	BB	BB	BB	AA	AA	BB	AA	BB	AA	AA	AA	BB	BB	AA	BB	BB	BB	AA	BB	BB	BB	BB	BB	BB	AA
4_36860624	AA	BB	AA	BB	BB	AA	AA	BB	BB	BB	BB	AA	BB	AA	AA	AA	BB	AA	BB	BB	BB	AA	BB	BB	BB	BB	BB	AA	AA	BB	AA	BB	AA	AA	AA	BB	BB	AA	BB	BB	BB	AA	BB	BB	BB	BB	BB	BB	AA
4_36860636	AA	BB	AA	BB	BB	AA	AA	BB	BB	BB	BB	AA	BB	AA	AA	AA	BB	AA	BB	BB	BB	AA	BB	BB	BB	BB	BB	AA	AA	BB	AA	BB	AA	AA	AA	BB	BB	AA	BB	BB	BB	AA	BB	BB	BB	BB	BB	BB	AA
4_36860638	AA	BB	AA	BB	BB	AA	AA	BB	BB	BB	BB	AA	BB	AA	AA	AA	BB	AA	BB	BB	BB	AA	BB	BB	BB	BB	BB	AA	AA	BB	AA	BB	AA	AA	AA	BB	BB	AA	BB	BB	BB	AA	BB	BB	BB	BB	BB	BB	AA
4_39147331	AA	BB	AA	BB	BB	AA	AA	BB	BB	BB	BB	AA	BB	AA	AA	AA	BB	AA	BB	AB	BB	AA	BB	BB	BB	BB	BB	AA	AA	BB	AA	AA	AA	AA	AA	BB	BB	AA	BB	BB	BB	AA	BB	AA	BB	BB	BB	BB	AA
4_39147487	AA	BB	AA	BB	BB	AA	AA	BB	BB	BB	BB	AA	BB	AA	AA	AA	BB	AA	BB	AB	BB	AA	BB	BB	BB	BB	BB	AA	AA	BB	AA	AA	AA	AA	AA	BB	BB	AA	BB	BB	BB	AA	BB	AA	BB	BB	BB	BB	AA
4_39147492	AA	BB	AA	BB	BB	AA	AA	BB	BB	BB	BB	AA	BB	AA	AA	AA	BB	AA	BB	AB	BB	AA	BB	BB	BB	BB	BB	AA	AA	BB	AA	AA	AA	AA	AA	BB	BB	AA	BB	BB	BB	AA	BB	AA	BB	BB	BB	BB	AA
4_43697656	AA	BB	AA	BB	BB	AA	AA	BB	BB	AA	BB	AA	BB	AA	AA	AA	BB	AA	BB	AB	BB	AA	BB	BB	BB	BB	AA	AA	AA	BB	AA	AA	AA	AA	AA	BB	BB	AA	BB	BB	BB	BB	AA	-	BB	BB	BB	BB	AA
4_43697663	AA	BB	AA	BB	BB	AA	AA	BB	BB	AA	BB	AA	BB	AA	AA	AA	BB	AA	BB	AB	BB	AA	BB	BB	BB	BB	AA	AA	AA	BB	AA	AA	AA	AA	AA	BB	BB	AA	BB	BB	BB	BB	AA	-	BB	BB	BB	BB	AA
4_43697692	AA	BB	AA	BB	BB	AA	AA	BB	BB	AA	BB	AA	BB	AA	AA	AA	BB	AA	BB	AB	BB	AA	BB	BB	BB	BB	AA	AA	AA	BB	AA	AA	AA	AA	AA	BB	BB	AA	BB	BB	BB	BB	AA	-	BB	BB	BB	BB	AA
4_44575446	AA	BB	AA	BB	BB	AA	AA	BB	BB	AA	BB	AA	BB	AA	AA	AA	BB	AA	BB	AB	BB	AA	BB	BB	BB	BB	AA	AA	AA	BB	AA	AA	AA	AA	AA	BB	BB	AA	BB	BB	BB	BB	AA	AA	BB	BB	BB	BB	AA
4_44575612	AA	BB	AA	BB	BB	AA	AA	BB	BB	AA	BB	AA	BB	AA	AA	AA	BB	AA	BB	AB	BB	AA	BB	BB	BB	BB	AA	AA	AA	BB	AA	AA	AA	AA	AA	BB	BB	AA	BB	BB	BB	BB	AA	AA	BB	BB	BB	BB	AA
4_45689052	AA	BB	AA	BB	BB	AA	AA	BB	BB	AA	BB	AA	BB	AA	AA	AA	BB	AA	BB	AB	BB	AA	BB	BB	BB	BB	AA	AA	AA	BB	AA	AA	AA	AA	AA	BB	BB	AA	BB	BB	BB	BB	AA	AA	BB	BB	BB	BB	AA
4_45791122	AA	BB	AA	BB	BB	AA	AA	BB	BB	AA	BB	AA	BB	AA	AA	AA	BB	AA	BB	AB	BB	AA	BB	BB	BB	BB	AA	AA	AA	BB	AA	AA	AA	AA	AA	BB	BB	AA	BB	BB	BB	BB	AA	AA	BB	BB	BB	BB	AA
4_45791328	AA	BB	-	BB	BB	AA	AA	BB	BB	AA	AB	AA	AB	AA	AA	AA	AB	AA	BB	AA	BB	AA	BB	-	AB	AB	AA	AA	AA	AB	AA	AA	AA	AA	AA	BB	AB	AA	AA	BB	AB	AB	AA	AA	AB	BB	AB	BB	AA
4_46020298	AA	BB	AA	BB	BB	AA	AA	BB	BB	AA	BB	AA	BB	AA	AA	AA	BB	AA	BB	AB	BB	AA	BB	BB	BB	BB	AA	AA	AA	BB	AA	AA	AA	AA	AA	BB	BB	AA	BB	BB	BB	BB	AA	AA	BB	BB	BB	BB	AA
4_46317104	AA	BB	AA	BB	BB	AA	AA	BB	BB	AA	BB	AA	BB	AA	AA	AA	BB	AA	BB	AB	BB	AA	BB	BB	BB	BB	AA	AA	AA	BB	AA	AA	AA	AA	AA	BB	BB	AA	BB	AB	BB	BB	AA	AA	BB	BB	BB	BB	AA
4_49067992	AA	BB	AA	BB	BB	AA	AA	BB	BB	AA	BB	AA	BB	AA	AA	AA	AA	AA	BB	AB	BB	AA	BB	AA	BB	BB	AA	AA	AA	BB	AA	AA	AA	AA	AA	BB	BB	AA	BB	BB	BB	BB	AA	AA	BB	BB	BB	BB	AA
4_49068010	AA	BB	AA	BB	BB	AA	AA	BB	BB	AA	BB	AA	BB	AA	AA	AA	AA	AA	BB	AB	BB	AA	BB	AA	BB	BB	AA	AA	AA	BB	AA	AA	AA	AA	AA	BB	BB	AA	BB	BB	BB	BB	AA	AA	BB	BB	BB	BB	AA
4_49068078	AA	BB	AA	BB	BB	AA	AA	BB	BB	AA	BB	AA	BB	AA	AA	AA	AA	AA	BB	AB	BB	AA	BB	AA	BB	BB	AA	AA	AA	BB	AA	AA	AA	AA	AA	BB	BB	AA	BB	BB	BB	BB	AA	AA	BB	BB	AB	BB	AA
4_52313448	AA	BB	AA	BB	BB	AA	AA	BB	BB	AA	BB	AA	BB	AA	AA	AA	AA	AA	BB	AB	BB	AA	BB	AA	BB	BB	AA	BB	AA	BB	BB	AA	AA	AA	AA	BB	BB	AA	BB	AB	BB	BB	BB	AA	BB	BB	AA	BB	AA
4_52353720	AA	BB	AA	BB	BB	AA	AA	BB	BB	AA	BB	AA	BB	AA	AA	AA	AA	AA	BB	AB	BB	AA	BB	AA	BB	BB	AA	BB	AA	BB	BB	AA	AA	AA	AA	BB	BB	AA	BB	AB	BB	BB	BB	AA	BB	BB	AA	BB	AA
4_52789292	AA	BB	AA	BB	BB	AA	AA	BB	BB	AA	BB	AA	BB	AA	AA	AA	AA	AA	BB	AB	BB	AA	BB	AA	BB	BB	AA	BB	AA	BB	BB	AB	AA	AA	AA	BB	AA	AA	BB	AB	BB	BB	BB	AA	AB	BB	AA	BB	AA
4_54494752	AA	BB	AA	BB	BB	AA	AA	BB	BB	AA	BB	AA	BB	AA	AA	AA	AA	AA	BB	AB	BB	AA	AA	AA	BB	BB	AA	BB	AA	BB	BB	AA	AA	AA	AA	BB	AA	AA	BB	AB	BB	BB	BB	AA	AB	BB	AA	BB	AA
4_57567122	AA	BB	AA	BB	BB	AA	AA	AB	BB	AA	BB	AA	BB	AA	AA	AA	AA	AA	BB	AB	BB	AA	AA	AA	BB	BB	AA	BB	AA	BB	BB	AA	AA	BB	AA	BB	AA	AA	BB	AB	BB	BB	BB	AA	AB	BB	AA	BB	AA
4_59664389	AA	BB	AA	BB	BB	BB	AA	AA	BB	AA	BB	AA	BB	AA	AA	AA	AA	AA	BB	AB	BB	AA	AA	AA	BB	AA	AA	BB	AA	BB	BB	AA	AA	BB	AA	BB	AA	AA	BB	AB	BB	BB	BB	AA	BB	BB	AA	BB	AA
4_60375465	AB	BB	AB	BB	BB	BB	AB	AB	BB	AB	BB	AB	BB	AB	AB	AB	AB	AB	BB	AB	BB	AB	AB	AB	BB	AB	AB	BB	AB	BB	BB	AB	AB	BB	AB	BB	AB	AB	BB	AB	BB	BB	BB	AB	BB	BB	AB	BB	AB
4_60553135	AA	BB	AA	BB	BB	BB	AA	AA	BB	AA	BB	AA	BB	AA	AA	AA	AA	AA	BB	AB	BB	AA	AA	AA	BB	AA	AA	BB	AA	BB	BB	AA	AA	BB	AA	BB	AA	AA	BB	AB	BB	BB	BB	AA	BB	BB	AA	BB	AA
4_60603434	AA	BB	AA	BB	BB	BB	AA	AA	BB	AA	BB	AA	BB	AA	AA	AA	AA	AA	BB	AB	BB	AA	AA	AA	BB	AA	AA	BB	AA	BB	BB	AA	AA	BB	AA	BB	AA	AA	BB	AB	BB	BB	BB	AA	BB	BB	AA	BB	AA
4_62642485	AA	BB	AA	BB	BB	BB	AA	AA	BB	AA	BB	AA	BB	AA	AA	AA	AA	AA	BB	AB	BB	AA	AA	AA	BB	AA	AA	BB	AA	BB	BB	AA	AA	BB	AA	BB	AA	AA	BB	AB	BB	BB	BB	AA	BB	BB	AA	BB	AA
4_69853346	AA	BB	AA	BB	BB	AA	AA	AA	BB	AA	AA	AA	BB	AA	AA	AA	AA	AA	BB	AB	BB	AA	AA	AA	BB	AA	AA	BB	AA	BB	BB	AA	AA	BB	AA	BB	AA	AA	BB	AB	BB	BB	AA	AA	AA	BB	AA	AA	AA
4_86201006	AA	AA	AA	BB	AA	AA	AA	AA	BB	AA	-	AA	BB	AA	AA	AA	AA	AA	BB	AB	AA	AA	AA	AA	BB	AA	AA	BB	AA	BB	BB	AA	BB	AA	AA	BB	AA	AA	BB	AB	BB	BB	AA	AA	AA	AA	AA	AA	BB
4_86201062	AA	AA	AA	BB	AA	AA	AA	AA	BB	AA	-	AA	BB	AA	AA	AA	AA	AA	BB	AB	AA	AA	AA	AA	BB	AA	AA	BB	AA	BB	BB	AA	BB	AA	AA	BB	AA	AA	BB	AB	BB	BB	AA	AA	AA	AA	AA	AA	BB
4_90310264	AA	AA	AA	BB	AA	AA	AA	AA	BB	AA	AA	AA	BB	AA	AA	AA	AA	AA	BB	AB	AA	AA	AA	AA	BB	AA	AA	BB	AA	BB	BB	AA	AA	AA	AA	BB	AA	AA	BB	AB	AA	BB	AA	AA	AA	AA	AA	AA	BB
4_90359522	AA	AA	AA	BB	AA	AA	AA	AA	BB	AA	AA	AA	BB	AA	AA	AA	AA	AA	BB	AB	AA	AA	AA	AA	BB	AA	AA	BB	AA	BB	BB	AA	AA	AA	AA	BB	AA	AA	BB	AB	AA	BB	AA	AA	AA	AA	AA	AA	-
4_90432859	AA	AA	AA	BB	AA	AA	AA	AA	BB	AA	AA	AA	BB	AA	AA	AA	AA	AA	BB	AB	AA	AA	AA	AA	BB	AA	AA	BB	AA	BB	BB	AA	AA	AA	AA	BB	AA	AA	BB	AB	AA	BB	AA	AA	AA	AA	AA	AA	BB
4_90575784	AA	AA	AA	BB	AA	AA	AA	-	BB	AA	AA	AA	BB	AA	AA	AA	AA	AA	BB	AB	AA	AA	AA	AA	BB	AA	AA	BB	AA	BB	BB	AA	AA	AA	AA	BB	AA	AA	BB	AB	AA	BB	AA	AA	AA	AA	AA	AA	BB
4_90575854	AA	AA	AA	BB	AA	AA	AA	-	BB	AA	AA	AA	BB	AA	AA	AA	AA	AA	BB	AB	AA	AA	AA	AA	BB	AA	AA	BB	AA	BB	BB	AA	AA	AA	AA	BB	AA	AA	BB	AB	AA	BB	AA	AA	AA	AA	AA	AA	BB
4_91278547	-	AA	AA	BB	AA	AA	AA	AA	BB	AA	AA	AA	BB	AA	AA	AA	AA	AA	BB	AB	AA	AA	AA	AA	BB	AA	AA	BB	AA	BB	BB	AA	AA	AA	AA	AA	AA	AA	BB	AB	AA	BB	AA	AA	AA	AA	AA	AA	BB
4_91278585	-	AA	AA	BB	AA	AA	AA	AA	BB	AA	AA	AA	BB	AA	AA	AA	AA	AA	BB	AB	AA	AA	AA	AA	BB	AA	AA	BB	AA	BB	BB	AA	AA	AA	AA	AA	AA	AA	BB	AB	AA	BB	AA	AA	AA	AA	AA	AA	BB
4_91279437	AA	AA	AA	BB	AA	AA	AA	AA	BB	AA	AA	AA	BB	AA	AA	AA	AA	AA	BB	AB	AA	AA	AA	AA	BB	AA	AA	BB	AA	BB	BB	AA	AA	AA	AA	AA	AA	AA	BB	AB	AA	BB	AA	AA	AA	AA	AA	AA	BB
4_91279464	AA	AA	AA	BB	AA	AA	AA	AA	BB	AA	AA	AA	BB	AA	AA	AA	AA	AA	BB	AB	AA	AA	AA	AA	BB	AA	AA	BB	AA	BB	BB	AA	AA	AA	AA	AA	AA	AA	BB	AB	AA	BB	AA	AA	AA	AA	AA	AA	BB
4_91279533	AA	AA	AA	BB	AA	AA	AA	AA	BB	AA	AA	AA	BB	AA	AA	AA	AA	AA	BB	AB	AA	AA	AA	AA	BB	AA	AA	BB	AA	BB	BB	AA	AA	AA	AA	AA	AA	AA	BB	AB	AA	BB	AA	AA	AA	AA	AA	AA	BB
4_91345871	AA	AA	AA	BB	AA	AA	AA	AA	BB	AA	AA	AA	BB	AA	AA	AA	AA	AA	BB	AB	AA	AA	AA	AA	BB	AA	AA	BB	AA	BB	BB	AA	AA	AA	AA	AA	AA	AA	BB	AB	AA	BB	AA	AA	AA	AA	AA	AA	BB
4_91345883	AA	AA	AA	BB	AA	AA	AA	AA	BB	AA	AA	AA	BB	AA	AA	AA	AA	AA	BB	AB	AA	AA	AA	AA	BB	AA	AA	BB	AA	BB	BB	AA	AA	AA	AA	AA	AA	AA	BB	AB	AA	BB	AA	AA	AA	AA	AA	AA	BB
4_94604489	AA	AA	AA	BB	AA	AA	AA	AA	BB	AA	AA	AA	BB	AA	AA	AA	AA	AA	BB	AA	BB	AA	AA	AA	AB	AA	AA	BB	AA	BB	BB	AA	AA	BB	AA	BB	AA	AA	BB	AB	AA	BB	AA	AA	AA	AA	AA	AA	BB
4_99724749	AA	AA	AA	BB	AA	BB	AA	AA	AB	BB	AA	AA	BB	AA	AA	AA	AA	AA	BB	AB	BB	AA	AA	AA	BB	AB	AA	BB	AA	AA	AB	AA	AA	BB	AA	BB	AA	AA	BB	AB	AA	BB	AA	AA	AA	AA	AA	AA	BB
4_99906935	AA	AA	AA	BB	AA	BB	AA	AA	AB	BB	AA	AA	BB	AA	AA	AA	AA	AA	BB	AB	BB	AA	AA	AA	BB	AB	AA	BB	AA	AA	AB	AA	AA	BB	AA	BB	AA	AA	BB	AB	AA	BB	AA	AA	AA	-	AA	AA	BB
4_99907001	AA	AA	AA	BB	AA	BB	AA	AA	AB	BB	AA	AA	BB	AA	AA	AA	AA	AA	BB	AB	BB	AA	AA	AA	BB	AB	AA	BB	AA	AA	AB	AA	AA	BB	AA	BB	AA	AA	BB	AB	AA	BB	AA	AA	AA	-	AA	AA	BB
4_100907292	AA	AA	AA	BB	AA	BB	AA	AA	AB	BB	AA	AA	BB	AA	AA	AA	AA	AA	BB	AB	BB	AA	AA	AA	BB	AB	AA	BB	AA	AA	AB	AA	AA	BB	AA	BB	AA	AA	BB	AB	AA	BB	AA	AA	AA	AA	AA	AA	BB
4_101190822	AA	AA	AA	BB	AA	BB	AA	AA	AB	BB	AA	AA	BB	BB	AA	AA	AA	AA	BB	AB	BB	AA	AA	AA	BB	AB	AA	BB	AA	AA	AB	AA	AA	BB	AA	BB	AA	AA	BB	AB	AA	BB	AA	AA	AA	AA	AA	AA	BB
4_102421740	AA	AA	AA	BB	AA	BB	AA	AA	AB	BB	AA	AA	BB	BB	AA	AA	AA	AA	BB	AB	BB	AA	AA	AA	BB	AB	AA	BB	AA	AA	AB	AA	AA	BB	AA	BB	AA	AA	BB	AA	AA	BB	AB	-	AA	AA	AA	AA	BB
4_102421769	AA	AA	AA	BB	AA	BB	AA	AA	AB	BB	AA	AA	BB	BB	AA	AA	AA	AA	BB	AB	BB	AA	AA	AA	BB	AB	AA	BB	AA	AA	AB	AA	AA	BB	AA	BB	AA	AA	BB	AA	AA	BB	AB	-	AA	AA	AA	AA	BB
4_102421775	AA	AA	AA	BB	AA	BB	AA	AA	AB	BB	AA	AA	BB	BB	AA	AA	AA	AA	BB	AB	BB	AA	AA	AA	BB	AB	AA	BB	AA	AA	AB	AA	AA	BB	AA	BB	AA	AA	BB	AA	AA	BB	AB	-	AA	AA	AA	AA	BB
4_102782225	AA	AA	AA	BB	AA	BB	AA	AA	AB	BB	AA	AA	BB	BB	AA	AA	AA	AA	BB	AB	BB	AA	AA	AA	BB	AB	AA	BB	AA	AA	AB	BB	AA	BB	AA	BB	AA	AA	BB	AB	AA	BB	AB	AA	AA	AA	AA	AA	BB
4_102792517	AA	AA	AA	BB	AA	BB	AA	AA	AB	BB	AA	AA	BB	BB	AA	AA	AA	AA	BB	AB	AA	AA	AA	AA	BB	AB	AA	BB	AA	AA	AB	BB	AA	BB	AA	BB	AA	AA	BB	AB	AA	BB	AB	AA	AA	AA	AA	AA	BB
4_103140516	AA	AA	AA	BB	AA	BB	AA	AA	AB	BB	AA	AA	BB	BB	AA	AA	AA	AA	BB	AB	AA	AA	AA	AA	BB	AA	AA	BB	AA	AA	AB	BB	AA	BB	AA	BB	AA	AA	BB	AB	AA	BB	AB	AA	AA	AA	AA	AA	BB
4_107292561	AA	AA	AA	AA	AA	BB	AA	AA	BB	BB	AA	AA	BB	BB	AA	AA	AA	AA	BB	AB	AA	AA	AA	AA	BB	AA	AA	BB	AA	AA	BB	BB	AA	BB	AA	BB	AA	AA	BB	AA	AA	BB	AB	AA	AA	AA	AA	AA	BB
4_108278823	AA	AA	AA	AA	AA	BB	AA	AA	BB	BB	AA	AA	BB	BB	AA	AA	AA	AA	BB	AB	AA	AA	AA	AA	BB	AA	AA	BB	AA	AA	BB	BB	AA	BB	AA	BB	AA	AA	BB	AA	AA	BB	AA	AA	AA	AA	AA	AA	BB
4_108321326	AA	AA	AA	AA	AA	BB	AA	AA	BB	BB	-	AA	BB	BB	AA	AA	AA	AA	BB	AB	AA	AA	AA	AA	BB	AA	AA	BB	AA	AA	BB	BB	AA	BB	AA	BB	AA	AA	BB	AA	AA	BB	AA	AA	AA	AA	AA	AA	BB
4_108721082	AA	AA	AA	AA	AA	BB	AA	AA	BB	BB	AA	AA	BB	BB	AA	AA	AA	AA	BB	AB	AA	AA	AA	AA	BB	AA	AA	BB	AA	AA	BB	BB	AA	BB	AA	BB	AA	AA	BB	AA	AA	BB	AA	AA	AA	AA	AA	AA	BB
4_108863269	AA	AA	AA	AA	AA	BB	AA	AA	BB	BB	AA	AA	BB	BB	AA	AA	AA	AA	BB	AB	AA	AA	AA	AA	BB	AA	AA	BB	AA	AA	BB	BB	AA	BB	AA	BB	AA	AA	BB	AA	AA	BB	AA	AA	AA	AA	AA	AA	BB
4_108863361	AA	AA	AA	AA	AA	BB	AA	AA	BB	BB	AA	AA	BB	BB	AA	AA	AA	AA	BB	AB	AA	AA	AA	AA	BB	AA	AA	BB	AA	AA	BB	BB	AA	BB	AA	BB	AA	AA	BB	AA	AA	BB	AA	AA	AA	AA	AA	AA	BB
4_114017867	AA	BB	AA	AA	AA	BB	AA	AA	BB	BB	AA	AA	BB	BB	AA	AA	AA	AA	BB	AB	AA	AA	AA	AA	BB	AA	AA	BB	AA	AA	BB	BB	AA	BB	AA	BB	AA	AA	BB	AA	AA	BB	AA	AA	BB	AA	BB	AA	BB
4_114018384	AA	BB	AA	AA	AA	BB	AA	AA	BB	BB	AA	AA	BB	BB	AA	AA	AA	AA	BB	AB	AA	AA	AA	AA	BB	AA	AA	BB	AA	AA	BB	BB	AA	BB	AA	BB	AA	AA	BB	AA	AA	BB	AA	AA	BB	AA	BB	AA	BB
4_115756151	AA	BB	AA	AA	AA	BB	AA	AA	BB	BB	AA	AA	BB	BB	AA	AA	AA	AA	BB	AB	AA	AA	AA	AA	BB	AA	AA	BB	AA	AA	BB	BB	AA	BB	AA	BB	AA	AA	BB	AA	AA	BB	AA	AA	BB	AA	BB	AA	BB
4_116396502	AA	BB	AA	AA	AA	BB	AA	AA	BB	BB	AA	AA	BB	BB	AA	AA	AA	AB	BB	AB	AA	AA	AA	AA	BB	AA	AA	BB	AA	AA	BB	BB	AA	BB	AA	BB	AA	AA	BB	AA	AA	BB	AA	AA	BB	AA	BB	AA	BB
4_116520396	AA	BB	AA	AA	AA	BB	AA	AA	BB	BB	AA	AA	BB	BB	AA	AA	AA	AB	BB	AB	AA	AA	AA	AA	BB	AA	AA	BB	AA	AA	BB	BB	AA	BB	AA	BB	AA	AA	BB	AA	AA	BB	AA	AA	BB	AA	BB	AA	BB
4_116528240	AA	BB	AA	AA	AA	BB	AA	AA	BB	BB	AA	AA	BB	BB	AA	AA	AA	AB	BB	AB	AA	AA	AA	AA	BB	AA	AA	BB	AA	AA	BB	BB	AA	BB	AA	BB	AA	AA	BB	AA	AA	BB	AA	AA	BB	AA	BB	AA	BB
4_119406785	AA	BB	AA	AA	AA	BB	AA	AA	BB	BB	AA	AA	BB	BB	AA	AA	AA	AB	BB	AB	AA	AA	AA	AA	BB	BB	AA	BB	AA	AA	BB	BB	AA	BB	AA	BB	AA	AA	BB	AA	AA	BB	AA	AA	BB	AA	BB	AA	BB
4_134102878	AA	BB	AA	AA	AA	AA	AA	AA	BB	BB	AA	AA	BB	BB	AA	AA	AA	AB	BB	AB	AA	AA	AA	AA	BB	BB	BB	AA	AA	AA	BB	BB	AA	BB	AB	BB	AB	AA	AA	AB	AA	BB	AA	AA	BB	AA	BB	AA	BB
4_137551539	AA	BB	AA	AA	AA	AA	AA	AA	BB	BB	AA	AA	BB	BB	AA	AA	AA	AB	BB	AB	AA	AA	AA	AA	BB	BB	BB	AA	AA	AA	BB	BB	AA	BB	AB	BB	BB	AA	AA	AB	AA	BB	AA	AA	BB	AA	BB	AA	BB
4_137576533	AA	BB	AA	AA	AA	AA	AA	AA	BB	BB	AA	AA	BB	BB	AA	AA	AA	AB	BB	AB	AA	AA	AA	AA	BB	BB	BB	AA	AA	AA	BB	BB	AA	BB	AB	BB	BB	AA	AA	AB	AA	BB	AA	AA	BB	AA	BB	AA	BB
4_137576635	AA	BB	AA	AA	AA	AA	AA	AA	BB	BB	AA	AA	BB	BB	AA	AA	AA	AB	BB	AB	AA	AA	AA	AA	BB	BB	BB	AA	AA	AA	BB	BB	AA	BB	AA	BB	BB	AA	AA	AB	AA	BB	AA	AA	BB	AA	BB	AA	BB
4_137576645	AA	BB	AA	AA	AA	AA	AA	AA	BB	BB	AA	AA	BB	BB	AA	AA	AA	AB	BB	AB	AA	AA	AA	AA	BB	BB	BB	AA	AA	AA	BB	BB	AA	BB	AA	BB	BB	AA	AA	AB	AA	BB	AA	AA	BB	AA	BB	AA	BB
4_137576657	AA	BB	AA	AA	AA	AA	AA	AA	BB	BB	AA	AA	BB	BB	AA	AA	AA	AB	BB	AB	AA	AA	AA	AA	BB	BB	BB	AA	AA	AA	BB	BB	AA	BB	AA	BB	BB	AA	AA	AB	AA	BB	AA	AA	BB	AA	BB	AA	BB
4_137576666	AA	BB	AA	AA	AA	AA	AA	AA	BB	BB	AA	AA	BB	BB	AA	AA	AA	AB	BB	AB	AA	AA	AA	AA	BB	BB	BB	AA	AA	AA	BB	BB	AA	BB	AA	BB	BB	AA	AA	AB	AA	BB	AA	AA	BB	AA	BB	AA	BB
4_137576697	AA	BB	AA	AA	AA	AA	AA	AA	BB	BB	AA	AA	BB	BB	AA	AA	AA	AB	BB	AB	AA	AA	AA	AA	BB	BB	BB	AA	AA	AA	BB	BB	AA	BB	AA	BB	BB	AA	AA	AB	AA	BB	AA	AA	BB	AA	BB	AA	BB
4_137579839	AA	BB	AA	AA	AA	AA	AA	AA	BB	BB	AA	AA	BB	BB	AA	AA	AA	AB	BB	AB	AA	AA	AA	AA	BB	BB	BB	AA	AA	AA	BB	BB	AA	BB	AB	BB	BB	AA	AA	AB	AA	BB	AA	AA	BB	AA	BB	AA	BB
4_138057825	AA	BB	AA	AA	AA	AA	AA	AA	BB	BB	AA	AA	BB	BB	AA	AA	AA	AB	BB	AB	AA	AA	AA	AA	BB	BB	BB	AA	AA	AA	BB	BB	AA	BB	AB	BB	BB	AA	AA	AB	AA	BB	AA	AA	BB	AA	BB	AA	BB
4_139331611	AA	BB	AA	AA	AA	AA	AA	AA	BB	BB	AA	AA	BB	BB	AA	AA	AA	AB	BB	AB	AA	AA	AA	AA	BB	BB	BB	AA	AA	AA	BB	BB	AA	BB	AB	BB	BB	AA	AA	AA	AA	BB	AA	AA	BB	AA	BB	AA	BB
4_139331705	AA	BB	AA	AA	AA	AA	AA	AA	BB	BB	AA	AA	BB	BB	AA	AA	AA	AB	BB	AB	AA	AA	AA	AA	BB	BB	BB	AA	AA	AA	BB	BB	AA	BB	AB	BB	BB	AA	AA	AB	AA	BB	AA	AA	BB	AA	BB	AA	BB
4_139528876	AA	BB	AA	AA	AA	AA	AA	AA	BB	BB	AA	AA	BB	BB	AA	AA	AA	AB	BB	AB	AA	AA	AA	AA	BB	BB	BB	AA	AA	AA	BB	BB	AA	BB	AB	BB	BB	AA	AA	AB	AA	BB	AA	AA	BB	AA	BB	AA	BB
4_140019816	AA	BB	AA	AA	AA	AA	AA	AA	BB	BB	AA	AA	BB	BB	AA	AA	AA	AB	BB	AB	AA	AA	AA	AA	BB	BB	BB	AA	AA	AA	BB	BB	AA	BB	AB	BB	BB	AA	AA	AB	AA	BB	AA	AA	BB	AA	BB	AA	BB
4_140283971	AA	BB	AA	AA	AA	AA	AA	AA	BB	BB	AA	AA	BB	BB	AA	AA	AA	AB	BB	AB	AA	AA	AA	AA	BB	BB	BB	AA	AA	AA	BB	BB	AA	BB	AB	BB	BB	AA	AA	AB	AA	BB	AA	AA	BB	AA	BB	AA	BB
4_140572449	AA	BB	AA	AA	AA	AA	AA	AA	BB	BB	AA	AA	BB	BB	AA	AA	AA	AB	BB	AB	AA	AA	AA	AA	BB	BB	BB	AA	AA	AA	BB	BB	AA	BB	AB	BB	BB	AA	AA	AB	AA	BB	AA	AA	BB	AA	BB	AA	BB
4_140572704	AA	BB	AA	AA	AA	AA	AA	AA	BB	BB	AA	AA	BB	BB	AA	AA	-	AA	BB	AB	AA	AA	AA	AA	BB	BB	BB	AA	AA	AA	BB	BB	AA	BB	AA	BB	BB	AA	AA	AB	AA	BB	-	AA	BB	AA	BB	AA	-
4_140676090	BB	BB	-	-	AA	AB	AB	AA	BB	BB	AB	AB	BB	BB	AB	AB	AA	BB	BB	AB	AB	AB	AA	AB	BB	BB	BB	BB	BB	AB	BB	BB	AB	BB	BB	BB	BB	AB	AB	AB	BB	BB	AB	AB	BB	AB	BB	-	BB
4_140676100	BB	BB	-	-	AA	AB	AB	AA	BB	BB	AB	AB	BB	BB	AB	AB	AA	BB	BB	AB	AB	AB	AA	AB	BB	BB	BB	BB	BB	AB	BB	BB	AB	BB	BB	BB	BB	AB	AB	AB	BB	BB	AB	AB	BB	AB	BB	-	BB
4_140769376	AA	BB	AA	AA	AA	AA	AA	AA	BB	BB	AA	AA	BB	BB	AA	AA	AA	AB	BB	AB	AA	AA	AA	AA	BB	BB	BB	AA	AA	AA	BB	BB	AA	BB	AB	BB	BB	AA	AA	AB	AA	BB	AA	AA	BB	AA	BB	AA	BB
4_140769462	AA	BB	AA	AA	AA	AA	AA	AA	BB	BB	AA	AA	BB	BB	AA	AA	AA	AB	BB	AB	AA	AA	AA	AA	BB	BB	BB	AA	AA	AA	BB	BB	AA	BB	AB	BB	BB	AA	AA	AB	AA	BB	AA	AA	BB	AA	BB	AA	BB
4_140769748	AA	BB	AA	AA	AA	AA	AA	AA	BB	BB	AA	AA	BB	BB	AA	AA	AA	BB	BB	AB	AA	AA	AA	AA	BB	BB	BB	AA	AA	AA	BB	BB	AA	BB	AB	BB	BB	AA	AA	AB	AA	BB	AA	AA	BB	AA	BB	AA	BB
4_141084643	AA	BB	AA	AA	AA	AA	AA	AA	BB	BB	AA	AA	BB	BB	AA	AA	AA	AA	BB	AB	AA	AA	AA	AA	BB	BB	AB	AA	AA	AA	BB	BB	AA	BB	AB	BB	BB	AA	AA	AB	AA	BB	AA	AA	BB	AA	BB	AA	BB
4_141541209	AA	BB	AA	AA	AA	AA	AA	AA	BB	BB	AA	AA	BB	BB	AA	AA	AA	AB	BB	AB	AA	AA	AA	AA	BB	BB	BB	AA	AA	AA	BB	BB	AA	BB	AB	BB	BB	AA	AA	AB	AA	BB	AA	AA	BB	AA	BB	AA	BB
4_146540945	AA	BB	AA	AA	BB	AA	AA	AA	BB	BB	AA	AA	BB	BB	AA	AA	AA	AB	BB	AB	AA	BB	AA	AA	BB	BB	BB	AA	AA	AA	AB	AA	AA	BB	AB	BB	BB	AA	AA	AB	AA	AB	AA	AA	BB	AA	BB	AA	BB
4_156913734	BB	BB	BB	AA	BB	AA	AA	AA	BB	BB	AA	AA	BB	BB	AB	AA	AA	AB	BB	AB	AA	BB	AA	AA	BB	BB	BB	AA	AA	BB	BB	AA	AA	BB	-	BB	BB	AA	AA	AB	AA	AB	AA	AA	BB	AA	BB	AA	BB
4_161539717	BB	BB	BB	AA	BB	AA	AA	AA	BB	BB	AA	AA	BB	AB	AA	AA	AA	AB	BB	AB	AA	BB	AA	AA	BB	BB	BB	AB	AA	BB	BB	AA	AA	BB	AA	BB	BB	AA	AA	AA	AA	BB	AA	AA	BB	AB	BB	BB	BB
4_162472302	BB	BB	BB	AA	BB	AA	AA	AA	BB	BB	AA	AA	BB	AB	AA	AA	AA	AB	BB	AB	AA	BB	AA	AA	BB	BB	BB	AB	AA	BB	BB	AA	AA	BB	AA	BB	BB	AA	AA	AA	AA	AB	AA	AA	BB	AB	BB	BB	BB
4_162472304	BB	BB	BB	AA	BB	AA	AA	AA	BB	BB	AA	AA	BB	AB	AA	AA	AA	AB	BB	AB	AA	BB	AA	AA	BB	BB	BB	AB	AA	BB	BB	AA	AA	BB	AA	BB	BB	AA	AA	AA	AA	AB	AA	AA	BB	AB	BB	BB	BB
4_162472357	BB	BB	BB	AA	BB	AA	AA	AA	BB	BB	AA	AA	BB	AB	-	AA	AA	AB	BB	AB	AA	BB	AA	AA	BB	BB	BB	AB	AA	BB	BB	AA	AA	BB	AA	BB	BB	-	AA	AA	AA	AB	AA	AA	BB	AB	BB	BB	BB
4_162472758	BB	BB	BB	AA	BB	AA	AA	AA	BB	BB	AA	AA	BB	AB	AA	AA	AA	AB	BB	AB	AA	BB	AA	AA	BB	BB	BB	AB	AA	BB	BB	AA	AA	BB	AA	BB	BB	AA	AA	AA	AA	AB	AA	AA	BB	AB	BB	BB	BB
4_166939016	BB	BB	BB	AA	BB	AA	AA	AA	BB	BB	AA	AA	BB	AB	AA	AB	AA	AB	BB	BB	AA	BB	AA	AA	BB	BB	BB	AB	AA	BB	BB	AA	AA	BB	AA	BB	BB	AA	AA	AA	AA	AB	BB	AA	BB	AB	BB	BB	BB
4_174739955	BB	BB	BB	AA	BB	AA	AA	BB	BB	BB	AA	AA	BB	AB	AA	AB	AA	BB	BB	BB	AA	BB	AA	AA	BB	BB	BB	AB	-	BB	BB	AB	AA	AA	AA	BB	BB	AA	AA	AA	AA	BB	BB	AA	BB	AB	BB	BB	BB
4_178577051	BB	BB	BB	AA	BB	AA	AA	BB	BB	BB	AA	AA	BB	AB	AA	AB	AA	BB	BB	BB	AA	BB	AA	AA	BB	BB	BB	AB	AA	BB	BB	AB	AA	AA	AA	BB	BB	AA	BB	AA	AA	BB	BB	AA	BB	AA	BB	AB	BB
4_180685071	-	BB	-	AA	BB	AA	AA	-	BB	BB	AA	AA	BB	AB	AA	AB	AA	BB	BB	BB	AA	BB	AA	AA	BB	BB	BB	AA	AA	BB	BB	AB	AA	AA	AA	BB	BB	AA	BB	AA	AA	BB	BB	AA	BB	AA	BB	AB	BB
4_180685107	-	BB	-	AA	BB	AA	AA	-	BB	BB	AA	AA	BB	AB	AA	AB	AA	BB	BB	BB	AA	BB	AA	AA	BB	BB	BB	AA	AA	BB	BB	AB	AA	AA	AA	BB	BB	AA	BB	AA	AA	BB	AB	AA	BB	AA	BB	AB	BB
4_180790942	BB	BB	BB	AA	BB	AA	AA	BB	BB	BB	AA	AA	BB	AB	AA	AB	AA	BB	BB	BB	AA	BB	AA	AA	BB	BB	BB	AB	AA	BB	BB	AB	AA	AA	AA	BB	BB	AA	BB	AA	AA	BB	BB	AA	BB	AA	BB	AB	BB
4_181510420	BB	BB	BB	AA	BB	AA	AA	BB	BB	BB	AA	AA	BB	AB	AA	AB	AA	BB	BB	BB	AA	BB	AA	AA	BB	BB	BB	AB	AA	BB	BB	AB	AA	AA	AA	BB	BB	AA	BB	AA	AA	BB	BB	AA	BB	AA	BB	AB	BB
4_188175300	BB	BB	BB	AA	AB	AA	AB	-	BB	BB	AB	AA	BB	AB	AA	AB	AA	BB	BB	BB	AA	BB	AA	AA	BB	AA	BB	AB	AB	BB	BB	AB	AA	AA	AA	BB	BB	AA	BB	AA	AA	BB	BB	AA	BB	AA	BB	BB	BB
4_188175347	BB	BB	BB	AA	AB	AA	AB	-	BB	BB	AB	AA	BB	AB	AA	AB	AA	BB	BB	BB	AA	BB	AA	AA	BB	AA	BB	AB	AB	BB	BB	AB	AA	AA	AA	BB	BB	AA	BB	AA	AA	BB	BB	AA	BB	AA	BB	BB	BB
4_189057430	BB	BB	BB	AA	AB	AA	AA	BB	BB	BB	AA	AA	BB	AB	AA	AB	AA	BB	BB	BB	AA	BB	AA	AA	BB	AA	BB	AB	AB	BB	BB	AB	AA	AA	-	BB	BB	AA	BB	AA	AA	BB	BB	AA	BB	AA	BB	BB	BB
4_193857417	BB	BB	BB	AA	AA	AA	AA	BB	BB	BB	AA	AA	AB	AB	AA	BB	AA	BB	BB	BB	BB	BB	-	AA	BB	AA	BB	AB	AB	BB	BB	BB	AA	AA	AA	BB	BB	AA	BB	AA	AA	BB	BB	AA	BB	AB	BB	BB	BB
4_203146505	BB	AA	BB	AA	BB	AA	AA	BB	BB	BB	BB	AA	AB	AB	AA	AB	AA	BB	BB	BB	BB	AB	AA	AA	BB	AA	BB	AB	BB	BB	BB	BB	AA	BB	AA	BB	BB	BB	BB	AA	AA	BB	BB	AA	BB	BB	BB	BB	BB
4_203146547	BB	AA	BB	AA	BB	AA	AA	BB	BB	BB	BB	AA	AB	AB	AA	AB	AA	BB	BB	BB	BB	AB	AA	AA	BB	AA	BB	AB	BB	BB	BB	BB	AA	BB	AA	BB	BB	BB	BB	AA	AA	BB	BB	AA	BB	BB	BB	BB	BB
4_216781386	BB	AA	BB	AA	BB	AA	AA	BB	BB	AA	AA	AA	AA	AA	AA	AB	AA	BB	BB	BB	BB	BB	AA	BB	BB	AA	BB	BB	BB	BB	BB	BB	AA	BB	AA	BB	BB	BB	BB	AA	AA	BB	BB	-	BB	BB	BB	BB	BB
4_217473324	BB	AA	BB	AA	BB	AA	AA	BB	BB	AA	AA	AA	AA	AA	AA	AB	AA	BB	BB	BB	AA	AB	AA	BB	BB	AA	BB	AB	BB	BB	BB	BB	BB	BB	AA	BB	BB	BB	BB	AA	AA	BB	BB	AA	BB	AB	BB	BB	BB
4_220278254	BB	AA	BB	AA	BB	AA	AA	BB	BB	AA	AA	AA	AA	AA	AA	AB	AA	BB	BB	BB	AA	AB	AA	BB	BB	AA	BB	AB	BB	BB	BB	BB	BB	BB	AA	AB	BB	BB	BB	AA	AA	BB	BB	AA	BB	AB	BB	BB	-
4_221914188	BB	AA	BB	AA	BB	AA	AA	BB	BB	AA	AA	AA	AA	AA	AA	AB	AA	BB	BB	BB	AA	AB	AA	BB	BB	AA	BB	AB	BB	BB	BB	BB	BB	BB	AA	AB	BB	BB	BB	AA	AA	BB	BB	AA	BB	BB	BB	BB	BB
4_223626046	BB	AA	BB	AA	BB	AA	AA	BB	BB	AA	AA	AA	AA	AA	AA	AB	AA	BB	BB	BB	AA	AB	AA	BB	BB	AA	BB	AB	BB	BB	BB	BB	BB	BB	AA	AB	BB	BB	BB	AA	AA	BB	BB	AA	BB	BB	BB	BB	BB
4_224341016	BB	AA	BB	AA	BB	AA	AA	BB	BB	AA	AA	BB	AA	AA	AA	AB	AA	BB	BB	BB	AA	AB	AA	BB	BB	AA	BB	AB	BB	BB	BB	BB	BB	BB	AA	AB	BB	BB	BB	AA	AA	BB	BB	AA	BB	AB	BB	BB	BB
4_226865678	BB	AA	BB	AA	BB	AA	AA	BB	BB	AA	AA	BB	AA	BB	AA	AB	AA	BB	BB	BB	BB	AB	AA	BB	BB	AA	BB	AB	AB	BB	BB	BB	BB	BB	AA	AB	BB	BB	BB	AA	AA	BB	BB	AA	BB	AB	BB	BB	BB
4_227014551	BB	AA	BB	AA	BB	AA	AA	BB	BB	AA	AA	BB	AA	BB	AA	AB	AA	BB	BB	BB	BB	AB	AA	BB	BB	BB	BB	AB	AB	BB	BB	BB	BB	BB	AA	AB	BB	BB	BB	AA	AA	BB	BB	-	BB	AB	BB	BB	BB
4_227014595	BB	AA	BB	AA	BB	AA	AA	BB	BB	AA	AA	BB	AA	BB	AA	AB	AA	BB	BB	BB	BB	AB	AA	BB	BB	BB	BB	AA	AB	BB	BB	BB	BB	BB	AA	AB	BB	BB	BB	AA	AA	BB	BB	-	BB	AB	BB	BB	BB
4_230834620	BB	AA	BB	AA	BB	AA	AA	AA	BB	AA	AA	BB	AA	BB	AA	AB	AA	BB	BB	BB	BB	AB	AA	BB	BB	BB	BB	AB	AB	BB	BB	BB	BB	BB	BB	AA	BB	BB	BB	AB	AA	BB	BB	BB	BB	BB	BB	BB	BB
4_236889691	BB	AA	BB	AA	BB	AA	AA	AA	BB	AA	AA	BB	AB	BB	AA	AB	AA	BB	BB	BB	BB	BB	AA	BB	BB	BB	BB	AB	BB	BB	BB	BB	BB	BB	BB	AA	BB	BB	AB	AB	AA	BB	BB	BB	BB	AB	BB	BB	AA
4_236890065	BB	AA	BB	AA	BB	AA	AA	AA	BB	AA	AA	BB	AA	BB	AA	AB	AA	BB	BB	BB	BB	BB	AA	BB	BB	BB	BB	AB	BB	BB	BB	BB	BB	BB	BB	AA	BB	BB	AB	AB	AA	BB	BB	BB	BB	AB	BB	BB	AA
4_240476676	BB	AA	BB	AA	BB	AA	AA	AA	BB	AA	-	BB	AB	BB	AA	AB	AA	BB	BB	BB	BB	BB	AA	BB	BB	BB	BB	AB	BB	BB	BB	BB	BB	BB	BB	AA	BB	BB	AB	AB	AA	BB	BB	BB	AA	AB	BB	BB	AA
4_241564494	BB	AA	BB	AA	BB	AA	BB	AA	BB	AA	AA	BB	AB	BB	AA	AB	AA	BB	BB	BB	BB	BB	AA	BB	BB	BB	BB	AB	BB	BB	BB	BB	BB	BB	BB	AA	BB	BB	AB	AB	AA	BB	BB	BB	AA	AB	BB	BB	-
4_242855363	BB	AA	BB	AA	BB	AA	BB	AA	BB	AA	AA	BB	AB	BB	AA	AB	AA	BB	BB	BB	BB	BB	AA	BB	BB	BB	BB	BB	BB	BB	BB	BB	BB	BB	BB	AA	BB	BB	AB	AB	AA	BB	BB	BB	AA	AA	BB	BB	AA
4_245091650	BB	AA	BB	AA	BB	AA	BB	AA	BB	AA	BB	BB	AB	BB	AA	AB	AA	BB	BB	BB	BB	BB	AA	BB	BB	BB	BB	AB	BB	BB	BB	BB	BB	BB	BB	AA	BB	BB	AB	AB	AA	BB	BB	BB	AA	AB	BB	BB	-
4_245902994	BB	AA	BB	AA	BB	AA	BB	BB	BB	AA	BB	BB	BB	BB	AA	AB	AA	-	BB	BB	BB	BB	AA	BB	BB	BB	BB	AB	BB	BB	BB	BB	AA	BB	BB	AA	BB	BB	AB	AB	AA	BB	BB	-	AA	AB	BB	AA	AA
4_247778368	BB	AA	BB	AA	BB	AA	BB	BB	BB	AA	BB	BB	BB	BB	AA	AB	AA	BB	BB	BB	BB	BB	AA	BB	BB	BB	BB	AB	BB	BB	BB	BB	AA	BB	BB	AA	BB	BB	AB	AB	AA	AB	BB	BB	AA	AB	BB	AA	AA
4_249620288	BB	AA	BB	AA	BB	AA	BB	BB	BB	AA	BB	BB	BB	BB	AA	AB	AA	BB	BB	BB	BB	BB	AA	BB	BB	BB	BB	AB	BB	BB	BB	BB	AA	BB	BB	AA	BB	BB	AB	AB	AA	AB	BB	BB	AA	AB	BB	AA	AA
4_250702901	BB	AA	BB	AA	BB	AA	BB	BB	BB	AA	BB	BB	BB	BB	AA	AB	AA	BB	BB	BB	BB	BB	AA	BB	BB	BB	BB	BB	BB	BB	BB	BB	AA	BB	BB	AA	BB	BB	AB	BB	AA	AB	BB	BB	AA	BB	BB	AA	AA
4_250702916	BB	AA	BB	AA	BB	AA	BB	BB	BB	AA	BB	BB	BB	BB	AA	AB	AA	BB	BB	BB	BB	BB	AA	BB	BB	BB	BB	BB	BB	BB	BB	BB	AA	BB	BB	AA	BB	BB	AB	BB	AA	AB	BB	BB	AA	BB	BB	AA	AA
4_250702967	BB	AA	BB	AA	BB	AA	BB	BB	BB	AA	BB	BB	BB	BB	AA	AB	AA	BB	BB	BB	BB	BB	AA	BB	BB	BB	BB	BB	BB	BB	BB	BB	AA	BB	BB	AA	BB	BB	AB	BB	AA	AB	BB	BB	AA	BB	BB	AA	AA
4_270260841	BB	AA	BB	AA	BB	AA	BB	BB	BB	AA	BB	BB	AA	BB	AA	BB	AA	BB	BB	BB	BB	BB	AB	BB	BB	BB	BB	AB	BB	BB	BB	BB	AA	BB	BB	AA	BB	BB	AB	AB	BB	AB	BB	BB	AA	AB	BB	AA	AA
4_279435525	BB	AA	BB	AA	BB	AA	BB	BB	BB	AA	AA	BB	AA	BB	AA	BB	AA	BB	BB	BB	BB	BB	AB	BB	BB	BB	BB	AB	BB	BB	BB	BB	AA	BB	BB	AA	BB	BB	AB	AB	BB	AB	AB	BB	AA	AB	BB	AA	BB
4_279435539	BB	AA	BB	AA	BB	AA	BB	BB	BB	AA	AA	BB	AA	BB	AA	BB	AA	BB	BB	BB	BB	BB	AB	BB	BB	BB	BB	AB	BB	BB	BB	BB	AA	BB	BB	AA	BB	BB	AB	AB	BB	AB	AB	BB	AA	AB	BB	AA	BB
4_282770950	BB	AA	BB	AB	BB	AA	BB	BB	BB	AA	AA	BB	AA	BB	AA	BB	AA	BB	BB	BB	BB	BB	AB	BB	BB	BB	BB	AB	BB	AB	BB	BB	AA	BB	BB	AA	BB	BB	AB	AB	BB	AB	AB	BB	AA	AB	BB	AA	BB
4_283890471	BB	AA	BB	AB	BB	AA	BB	BB	BB	AA	AA	BB	AA	BB	AA	BB	AA	BB	BB	BB	BB	BB	AB	BB	BB	BB	BB	AB	BB	AB	BB	BB	AA	BB	BB	AA	BB	BB	AB	AB	BB	AB	AB	BB	AA	AB	BB	AA	BB
4_287043348	BB	AA	BB	BB	BB	AA	BB	BB	AA	AA	AA	BB	AA	BB	AA	BB	AA	BB	BB	BB	BB	BB	AB	BB	BB	BB	BB	AB	BB	AB	BB	BB	AA	BB	BB	AA	BB	BB	AB	AB	BB	AB	AB	AA	AA	AB	BB	AA	BB
4_287043357	BB	AA	BB	BB	BB	AA	BB	BB	AA	AA	AA	BB	AA	BB	AA	BB	AA	BB	BB	BB	BB	BB	AB	BB	BB	BB	BB	AB	BB	AB	BB	BB	AA	BB	BB	AA	BB	BB	AB	AB	BB	AB	AB	AA	AA	AB	BB	AA	BB
4_287043378	BB	AA	BB	BB	BB	AA	BB	BB	AA	AA	AA	BB	AA	BB	AA	BB	AA	BB	BB	BB	BB	BB	AB	BB	BB	BB	BB	AB	BB	AB	BB	BB	AA	BB	BB	AA	BB	BB	AB	AB	BB	AB	AB	AA	AA	AB	BB	AA	BB
4_287043411	BB	AA	BB	BB	BB	AA	BB	BB	AA	AA	AA	BB	AA	BB	AA	BB	AA	BB	BB	BB	BB	BB	AB	BB	BB	BB	BB	AB	BB	AB	BB	BB	AA	BB	BB	AA	BB	BB	AB	AB	BB	AB	AB	AA	AA	AB	BB	AA	BB
4_287043417	BB	AA	BB	BB	BB	AA	BB	BB	AA	AA	AA	BB	AA	BB	AA	BB	AA	BB	BB	BB	BB	BB	AB	BB	BB	BB	BB	AB	BB	AB	BB	BB	AA	BB	BB	AA	BB	BB	AB	AB	BB	AB	AB	AA	AA	AB	BB	AA	BB
4_288162975	BB	AA	BB	BB	BB	AA	BB	BB	AA	AA	AA	BB	AA	BB	AA	BB	AA	BB	BB	BB	BB	BB	AB	BB	BB	BB	BB	AB	BB	AB	BB	BB	AA	BB	BB	AA	BB	BB	AB	AB	BB	AB	BB	AA	AA	AB	BB	AA	BB
4_296939368	BB	AA	BB	AA	BB	AA	BB	BB	AA	AA	AA	BB	AA	BB	AA	BB	AA	BB	BB	BB	BB	BB	AA	BB	AB	BB	BB	AA	BB	AA	BB	BB	AA	BB	BB	AA	BB	AA	AB	AB	BB	BB	BB	AA	AA	AB	BB	AA	BB
4_314568888	BB	AA	BB	-	BB	AA	BB	AA	AA	AA	BB	AA	AA	BB	AA	BB	AA	BB	BB	BB	BB	BB	AA	BB	AB	AB	BB	AA	BB	AA	BB	BB	AA	AA	BB	AA	BB	AA	AA	BB	BB	BB	AB	AA	BB	BB	BB	AA	BB
4_314568903	BB	AA	BB	-	BB	AA	BB	AA	AA	AA	BB	AA	AA	BB	AA	BB	AA	BB	BB	BB	BB	BB	AA	BB	AB	AB	BB	AA	BB	AA	BB	BB	AA	AA	BB	AA	BB	AA	AA	BB	BB	BB	AB	AA	BB	BB	BB	AA	BB
4_314568924	BB	AA	BB	-	BB	AA	BB	AA	AA	AA	BB	AA	AA	BB	AA	BB	AA	BB	BB	BB	BB	BB	AA	BB	AB	AB	BB	AA	BB	AA	BB	BB	AA	AA	BB	AA	BB	AA	AA	BB	BB	BB	AB	AA	BB	BB	BB	AA	BB
4_314568994	BB	AA	BB	AA	BB	AA	BB	AA	AA	AA	BB	AA	AA	BB	AA	BB	AA	BB	AB	BB	BB	BB	AA	BB	AB	BB	BB	-	BB	AA	BB	BB	-	AA	BB	AA	BB	AA	AA	BB	BB	BB	AB	AA	BB	BB	BB	AA	BB
4_314568996	BB	AA	BB	AA	BB	AA	BB	AA	AA	AA	BB	AA	AA	BB	AA	BB	AA	BB	AB	BB	BB	BB	AA	BB	AB	BB	BB	-	BB	AA	BB	BB	-	AA	BB	AA	BB	AA	AA	BB	BB	BB	AB	AA	BB	BB	BB	AA	BB
4_314569011	BB	AA	BB	AA	BB	AA	BB	AA	AA	AA	BB	AA	AA	BB	AA	BB	AA	BB	AB	BB	BB	BB	AA	BB	AB	BB	BB	AA	BB	AA	BB	BB	-	AA	BB	AA	BB	AA	AA	AB	BB	BB	AB	AA	BB	BB	BB	AA	BB
4_314569059	BB	AA	BB	AA	BB	AA	BB	AA	AA	AA	BB	AA	AA	BB	AA	BB	AA	BB	AB	BB	BB	BB	AA	BB	AB	BB	BB	AA	BB	AA	BB	BB	-	AA	BB	AA	BB	AA	AA	AB	BB	BB	AB	AA	BB	BB	BB	AA	BB
4_314569060	BB	AA	BB	AA	BB	AA	BB	AA	AA	AA	BB	AA	AA	BB	AA	BB	AA	BB	AB	BB	BB	BB	AA	BB	AB	BB	BB	AA	BB	AA	BB	BB	-	AA	BB	AA	BB	AA	AA	AB	BB	BB	AB	AA	BB	BB	BB	AA	BB
4_323630898	BB	AA	BB	AA	BB	AA	BB	AA	AA	AA	BB	AA	AA	BB	AA	BB	AA	BB	AB	BB	BB	AA	AA	BB	AB	AB	BB	AA	BB	AA	BB	BB	AA	AA	BB	AA	BB	AA	AA	AB	BB	BB	AA	AA	AB	BB	BB	AA	BB
4_323630946	BB	AA	BB	AA	BB	AA	BB	AA	AA	AA	BB	AA	AA	BB	AA	BB	AA	BB	AB	BB	BB	AA	AA	BB	AB	AB	BB	AA	BB	AA	BB	BB	AA	AA	BB	AA	BB	AA	AA	AB	BB	BB	AA	AA	AB	BB	BB	AA	BB
4_323630993	BB	AA	BB	AA	BB	AA	BB	AA	AA	AA	BB	AA	AA	BB	AA	BB	AA	BB	AB	BB	BB	AA	AA	BB	AB	AB	BB	AA	BB	AA	BB	BB	AA	AA	BB	AA	BB	AA	AA	AB	BB	BB	AA	AA	AB	BB	BB	AA	BB
4_333847005	BB	AA	BB	AA	AB	AA	BB	AA	AA	AA	BB	AA	AA	BB	AA	BB	AA	BB	AB	BB	BB	AA	BB	BB	AB	AA	BB	AA	BB	AA	BB	BB	AA	AA	BB	AA	BB	AA	AA	AB	BB	BB	AA	AA	AB	BB	BB	AA	BB
4_333847041	BB	AA	BB	AA	AB	AA	BB	AA	AA	AA	BB	AA	AA	BB	AA	BB	AA	BB	AB	BB	BB	AA	BB	BB	AB	AA	BB	AA	BB	AA	BB	BB	AA	AA	BB	AA	BB	AA	AA	AB	BB	BB	AA	AA	AB	BB	BB	AA	BB
4_333847056	BB	AA	BB	AA	AB	AA	BB	AA	AA	AA	BB	AA	AA	BB	AA	BB	AA	BB	AB	BB	BB	AA	BB	BB	AB	AA	BB	AA	BB	AA	BB	BB	AA	AA	BB	AA	BB	AA	AA	AB	BB	BB	AA	AA	AB	BB	BB	AA	BB
4_333847451	BB	AA	BB	AA	AB	AA	BB	AA	AA	AA	BB	AA	AA	BB	AA	BB	AA	BB	AB	BB	BB	AA	BB	BB	AB	AA	BB	AA	BB	AA	BB	BB	AA	AA	BB	AA	BB	AA	AA	AB	BB	BB	AA	AA	AB	BB	BB	AA	BB
4_336736640	BB	AA	BB	AA	AB	AA	BB	AA	AA	AA	BB	AA	AA	BB	AA	BB	AA	BB	AB	BB	BB	AA	BB	BB	AB	AA	BB	AA	BB	AA	BB	BB	AA	AA	BB	AA	BB	AA	AA	AB	BB	BB	AA	AA	AB	BB	BB	AA	BB
4_336737103	BB	AA	BB	AA	AB	AA	BB	AA	AA	AA	BB	AA	AA	BB	AA	BB	AA	BB	AB	BB	BB	AA	BB	BB	AB	AA	BB	AA	BB	AA	BB	BB	AA	AA	BB	AA	BB	AA	AA	AB	BB	BB	AA	AA	AB	BB	BB	AA	BB
4_355257325	-	AA	BB	AA	AA	AA	BB	AA	AA	AA	AA	AA	AA	BB	AA	BB	AA	AA	AB	AA	BB	AA	BB	BB	AB	AA	BB	AA	BB	AA	AA	BB	AA	AA	BB	AA	AA	BB	AA	BB	AA	BB	AA	AA	AB	BB	BB	AA	BB
4_356271249	BB	AA	BB	AA	AA	AA	BB	AA	AA	AA	AA	AA	AA	BB	AA	BB	AA	AA	AB	AA	BB	AA	BB	AA	AB	AA	BB	AA	BB	AB	AA	BB	AA	AA	BB	AA	AA	BB	AA	BB	AA	AA	AA	AB	AB	BB	BB	AA	BB
4_360013281	BB	AA	BB	AA	AA	AA	BB	AA	AA	AA	AA	AA	AA	BB	AA	BB	AA	AA	AB	AA	BB	AA	BB	AA	AB	AA	BB	AA	BB	AB	AA	BB	AA	AA	BB	AA	AA	BB	AA	BB	AA	AA	AA	AA	AA	BB	BB	AA	BB
4_360013569	BB	AA	BB	AA	AA	AA	BB	AA	AA	AA	AA	AA	AA	BB	AA	BB	AA	AA	AB	AA	BB	AA	BB	AA	AB	AA	BB	AA	BB	AB	AA	BB	AA	AA	BB	AA	AA	BB	AA	BB	AA	AA	AA	AA	AA	BB	BB	AA	BB
4_360533736	BB	AA	BB	AA	AA	AA	BB	AA	AA	AA	-	AA	AA	BB	AA	BB	AA	AA	AB	AA	BB	AA	BB	AA	AB	AA	BB	AA	BB	AB	AA	BB	AA	AA	BB	AA	AA	BB	AA	BB	AA	AA	AA	AA	AA	BB	BB	AA	BB
4_360533756	BB	AA	BB	AA	AA	AA	BB	AA	AA	AA	-	AA	AA	BB	AA	BB	AA	AA	AB	AA	BB	AA	BB	AA	AB	AA	BB	AA	BB	AB	AA	BB	AA	AA	BB	AA	AA	BB	AA	BB	AA	AA	AA	AA	AA	BB	BB	AA	BB
4_361945198	BB	AA	BB	AA	AA	AA	BB	AA	AA	AA	AA	AA	AA	BB	AA	BB	AA	AA	AB	AA	BB	AA	BB	AA	AB	AA	BB	AA	BB	AB	AA	BB	AA	AA	BB	AA	AA	BB	AA	BB	AA	AA	AA	AA	AA	BB	BB	AA	BB
4_361945203	BB	AA	BB	AA	AA	AA	BB	AA	AA	AA	AA	AA	AA	BB	AA	BB	AA	AA	AB	AA	BB	AA	BB	AA	AB	AA	BB	AA	BB	AB	AA	BB	AA	AA	BB	AA	AA	BB	AA	BB	AA	AA	AA	AA	AA	BB	BB	AA	BB
4_363398733	BB	AA	BB	AA	AA	AA	BB	AA	AA	AA	AA	AA	AA	BB	AA	BB	AA	AA	AB	AA	BB	AA	BB	AA	AB	AA	BB	AA	BB	AB	AA	BB	AA	AA	BB	AA	AA	BB	AA	BB	AA	AA	AA	AA	AA	BB	BB	AA	BB
4_366689060	BB	AA	BB	AA	AA	AA	BB	AA	AA	AA	AA	AA	AA	BB	AA	BB	AA	AA	AB	AA	BB	AA	BB	AA	AB	AA	BB	AA	BB	BB	AA	BB	BB	AA	BB	AA	AA	AA	AA	BB	AA	AA	AA	AA	AA	BB	BB	AA	BB
4_366689087	BB	AA	BB	AA	AA	AA	BB	AA	AA	AA	AA	AA	AA	BB	AA	BB	AA	AA	AB	AA	BB	AA	BB	AA	AB	AA	BB	AA	BB	BB	AA	BB	BB	AA	BB	AA	AA	AA	AA	BB	AA	AA	AA	AA	AA	BB	BB	AA	BB
4_366726178	BB	AA	BB	AA	AA	AA	BB	AA	AA	AA	AA	AA	AA	BB	AA	BB	AA	AA	AB	AA	BB	AA	BB	AA	AB	AA	BB	AA	BB	BB	AA	BB	BB	AA	BB	AA	AA	AA	AA	BB	AA	AA	AA	AA	AA	BB	BB	AA	BB
5_2738066	AA	AA	AA	AA	BB	AA	BB	AB	AA	BB	BB	AA	BB	AA	AA	BB	AA	BB	AA	BB	AA	BB	AB	AA	BB	BB	AA	BB	BB	AA	AA	AA	AA	AA	AA	AA	AA	AA	AA	AA	AA	AA	BB	BB	AA	AA	AA	AA	AA
5_3765398	AA	AA	AA	AA	BB	AA	BB	AB	AA	BB	BB	AA	BB	AA	AA	BB	AA	BB	AA	BB	AA	BB	AB	AA	BB	BB	AA	BB	BB	AA	AA	AA	AA	AA	AA	AA	AA	AA	AA	AA	AA	AA	BB	BB	AA	AA	AA	AA	AA
5_15880257	AA	AA	AA	AA	BB	BB	BB	AB	AA	BB	BB	AA	BB	AA	AA	BB	BB	BB	AA	AA	AA	BB	AB	AB	AA	BB	AA	BB	BB	AA	AA	AA	AA	AA	AA	BB	AA	AA	AA	AA	AA	AA	AA	AA	AA	AB	AA	AA	AB
5_16388421	AA	AA	AA	AA	BB	BB	BB	AB	AA	AA	BB	AA	BB	AA	AA	BB	BB	BB	AA	AA	AA	BB	AB	AB	AA	BB	AA	BB	BB	AA	AA	AA	AA	AA	AA	AA	AA	AA	AA	AA	AA	AA	AA	AA	AA	AA	AA	AA	AB
5_16396883	-	AA	AA	AA	BB	BB	BB	-	AA	BB	BB	AA	BB	AA	AA	BB	BB	-	AA	AA	AA	BB	AB	BB	AA	BB	AA	BB	BB	AA	AA	AA	AA	AA	AA	AA	AA	AA	AA	AA	AA	AA	AA	AA	AA	AA	AA	AA	AB
5_16396885	-	AA	AA	AA	BB	BB	BB	-	AA	BB	BB	AA	BB	AA	AA	BB	BB	-	AA	AA	AA	BB	AB	BB	AA	BB	AA	BB	BB	AA	AA	AA	AA	AA	AA	AA	AA	AA	AA	AA	AA	AA	AA	AA	AA	AA	AA	AA	AB
5_16396919	-	AA	AA	AA	BB	BB	BB	-	AA	BB	BB	AA	BB	AA	AA	BB	BB	-	AA	AA	AA	BB	AB	BB	AA	BB	AA	BB	BB	AA	AA	AA	AA	AA	AA	AA	AA	AA	AA	AA	AA	AA	AA	AA	AA	AA	AA	AA	AB
5_16396938	-	AA	AA	AA	BB	BB	BB	-	AA	BB	BB	AA	BB	AA	AA	BB	BB	-	AA	AA	AA	BB	AB	BB	AA	BB	AA	BB	BB	AA	AA	AA	AA	AA	AA	AA	AA	AA	AA	AA	AA	AA	AA	AA	AA	AA	AA	AA	AB
5_37681265	BB	AA	BB	AA	AB	BB	BB	BB	AA	BB	BB	BB	AA	AA	BB	BB	BB	BB	AA	AA	AA	BB	AA	BB	AA	AA	AA	BB	BB	AA	AA	AA	AA	AA	AA	AA	BB	AA	AB	AA	AA	AA	AA	AA	-	AA	AA	AA	BB
5_51888185	AB	AA	AB	AA	BB	BB	BB	BB	AA	BB	AA	AA	AA	AA	BB	AA	BB	BB	BB	AA	AA	BB	AB	BB	AA	AA	AA	BB	BB	AA	AA	AA	AA	AB	AA	BB	BB	AA	AB	AA	AA	AB	AA	AA	AA	AA	AA	AA	BB
5_51888203	AB	AA	AB	AA	BB	BB	BB	BB	AA	BB	AA	AA	AA	AA	BB	AA	BB	BB	BB	AA	AA	BB	AB	BB	AA	AA	AA	BB	BB	AA	AA	AA	AA	AB	AA	BB	BB	AA	AB	AA	AA	AB	AA	AA	AA	AA	AA	AA	BB
5_59422668	AB	AA	BB	AA	BB	AA	AB	BB	AA	BB	AA	AA	AA	AA	AA	AA	BB	BB	BB	AA	AA	BB	AB	BB	AA	BB	AA	BB	BB	AA	BB	AA	AA	AB	AA	BB	BB	AA	AA	AA	AA	AB	AA	AA	AA	AA	AA	AA	BB
5_59422717	AB	AA	BB	AA	BB	AA	AB	BB	AA	BB	AA	AA	AA	AA	AA	AA	BB	BB	BB	AA	AA	BB	AB	BB	AA	BB	AA	BB	BB	AA	BB	AA	AA	AB	AA	BB	BB	AA	AA	AA	AA	AB	AA	AA	AA	AA	AA	AA	BB
5_59926284	AB	AA	BB	AA	BB	AA	AB	BB	AA	BB	AA	AA	AA	AA	AA	AA	BB	BB	BB	AA	AA	BB	AB	BB	AA	BB	AA	BB	BB	AA	BB	AA	AA	AB	AA	BB	BB	AA	AA	AA	AA	AB	AA	AA	AA	AA	AA	AA	BB
5_60062240	AA	AA	BB	AA	BB	AA	AB	BB	AA	BB	AA	AA	AA	AA	AA	AA	BB	BB	BB	AA	AA	BB	AB	BB	AA	BB	AA	BB	BB	AA	BB	AA	AA	AB	AA	BB	BB	AA	AA	AA	AA	AB	AA	AA	AA	AA	AA	AA	BB
5_62595005	AB	AA	BB	AA	BB	AA	AB	BB	AA	BB	AA	AA	AA	AA	AA	AA	BB	BB	BB	AA	AA	BB	AB	BB	AA	BB	AA	BB	BB	AA	BB	AA	AA	AB	AA	BB	BB	AA	AA	AA	AA	AB	AA	AA	AA	AA	AA	AA	BB
5_62595014	AB	AA	BB	AA	BB	AA	AB	BB	AA	BB	AA	AA	AA	AA	AA	AA	BB	BB	BB	AA	AA	BB	AB	BB	AA	BB	AA	BB	BB	AA	BB	AA	AA	AB	AA	BB	BB	AA	AA	AA	AA	AB	AA	AA	AA	AA	AA	AA	BB
5_65564646	BB	AA	BB	AA	-	AA	AB	AA	AA	BB	AA	AA	AA	AA	AA	AA	BB	AB	BB	AA	AA	BB	AB	BB	AA	BB	AA	BB	BB	AA	BB	AA	AA	AB	-	BB	BB	AA	AA	BB	AA	BB	AA	AA	AA	AA	AA	AA	BB
5_66330223	AB	AA	BB	AA	BB	AA	AB	AA	AA	BB	AA	AA	AA	AA	AA	AA	BB	AB	BB	AA	AA	BB	AB	BB	AA	BB	AA	BB	BB	AA	BB	AA	AA	AB	AA	BB	BB	AA	AA	BB	AA	BB	AA	AA	AA	AA	AA	AA	BB
5_66330234	AB	AA	BB	AA	BB	AA	AB	AA	AA	BB	AA	AA	AA	AA	AA	AA	BB	AB	BB	AA	AA	BB	AB	BB	AA	BB	AA	BB	BB	AA	BB	AA	AA	AB	AA	BB	BB	AA	AA	BB	AA	BB	AA	AA	AA	AA	AA	AA	BB
5_66332320	AB	AA	BB	AA	BB	AA	AB	AA	AA	BB	AA	AA	AA	AA	AA	AA	BB	AA	BB	AA	AA	BB	AB	BB	AA	BB	AA	BB	BB	AA	BB	AA	AA	AB	AA	BB	BB	AA	AA	BB	AA	BB	AA	AA	AA	AA	AA	AA	BB
5_68238992	BB	AA	BB	AA	BB	AA	AB	AA	AA	BB	AA	AA	AA	AA	AA	AA	BB	AB	BB	AA	AA	BB	AB	BB	AA	BB	AA	BB	BB	AA	BB	AA	AA	AB	AA	BB	BB	AA	AA	BB	AA	BB	AA	AA	AA	AA	AA	AA	BB
5_68678291	AB	AA	BB	AA	BB	AA	AB	AA	AA	BB	AA	AA	AA	AA	AA	AA	BB	AB	BB	AA	AA	BB	AB	BB	AA	BB	AA	BB	BB	AA	BB	AA	AA	AB	AA	AA	BB	AA	AA	BB	AA	BB	AA	-	AA	AA	AA	AA	BB
5_68678365	AB	AA	BB	AA	BB	AA	AB	AA	AA	BB	AA	AA	AA	AA	AA	AA	BB	AB	BB	AA	AA	BB	AB	BB	AA	BB	AA	BB	BB	AA	BB	AA	AA	AB	AA	AA	BB	AA	AA	BB	AA	BB	AA	-	AA	AA	AA	AA	BB
5_71078522	AB	AA	BB	AA	BB	AA	AB	AA	AA	BB	AA	AA	AA	AA	AA	AA	BB	AB	BB	AA	AA	BB	AA	AA	AA	BB	AA	BB	BB	AA	BB	AA	AA	AA	AA	AA	BB	AA	BB	BB	AA	BB	AA	AA	AA	AA	AA	AA	BB
5_71078558	AB	AA	BB	AA	BB	AA	AB	AA	AA	BB	AA	AA	AA	AA	AA	AA	BB	AB	BB	AA	AA	BB	AA	AA	AA	BB	AA	BB	BB	AA	BB	AA	AA	AA	AA	AA	BB	AA	BB	BB	AA	BB	AA	AA	AA	AA	AA	AA	BB
5_74288660	AB	AA	BB	AA	BB	AA	AB	AA	AA	BB	AA	AA	AA	AA	AA	AA	BB	AB	BB	AA	AA	BB	AA	AA	AA	BB	AA	AA	BB	AA	BB	AA	AA	AA	AA	AA	BB	AA	BB	BB	AA	BB	AA	AA	BB	AA	AA	AA	BB
5_79042439	AB	AA	BB	AA	BB	AB	AB	AA	BB	BB	AA	AA	AA	AA	AA	AA	BB	AB	BB	AA	AA	BB	AA	AA	AA	BB	AA	AA	BB	AA	BB	AA	AA	AA	AA	AA	BB	AA	BB	BB	AA	BB	AA	AA	BB	AA	AA	AA	BB
5_79042592	AB	AA	-	AA	BB	AB	AB	AA	BB	BB	AA	AA	AA	AA	AA	AA	BB	AB	BB	AA	AA	BB	AA	AA	AA	BB	AA	AA	BB	AA	BB	AA	AA	AA	AA	AA	BB	AA	BB	BB	AA	BB	AA	AA	BB	AB	AA	AA	BB
5_79042610	AB	AA	-	AA	BB	AB	AB	AA	BB	BB	AA	AA	AA	AA	AA	AA	BB	AB	BB	AA	AA	BB	AA	AA	AA	BB	AA	AA	BB	AA	BB	AA	AA	AA	AA	AA	BB	AA	BB	BB	AA	BB	AA	AA	BB	AB	AA	AA	BB
5_79042685	AB	AA	-	AA	BB	AB	AB	AA	BB	BB	AA	AA	AA	AA	AA	AA	BB	AB	BB	AA	AA	BB	AA	AA	AA	BB	AA	AA	BB	AA	BB	AA	AA	AA	AA	AA	BB	AA	BB	BB	AA	BB	AA	AA	BB	AB	AA	AA	BB
5_84607244	AB	AA	BB	AA	BB	AB	AB	AA	BB	BB	AA	AA	AA	AA	AA	AA	BB	AB	BB	AA	AA	BB	BB	AA	AA	BB	AA	AA	BB	AA	BB	AA	AA	BB	AA	AA	BB	AA	BB	BB	AA	BB	AA	AA	BB	AA	AA	AA	BB
5_111931383	BB	AA	BB	AA	BB	AB	AB	AA	BB	BB	AA	AA	BB	AA	AA	AA	BB	AA	BB	AB	AA	BB	BB	BB	AA	BB	AA	AA	BB	AA	BB	AA	AA	BB	AA	AA	BB	AA	BB	BB	AA	BB	AA	AA	BB	AA	BB	AA	BB
5_114026684	BB	AA	BB	AA	BB	AB	AA	AA	BB	BB	AA	AA	BB	AA	AA	AA	BB	AA	BB	AB	AA	BB	BB	BB	AA	BB	AA	AA	BB	AA	BB	AA	AA	BB	AA	AA	BB	AA	BB	BB	AA	BB	AA	AA	BB	AA	BB	AA	BB
5_114083504	BB	AA	BB	AA	BB	AB	AA	AA	BB	BB	AA	AA	BB	AA	AA	AA	BB	AA	BB	AB	AA	BB	BB	BB	AA	BB	AA	AA	BB	AA	BB	AA	AA	BB	-	AA	BB	AA	BB	BB	AA	BB	AA	AA	BB	AA	BB	AA	BB
5_114083559	BB	AA	BB	AA	BB	AB	AA	AA	BB	BB	AA	AA	BB	AA	AA	AA	BB	AA	BB	AB	AA	BB	BB	BB	AA	BB	AA	AA	BB	AA	BB	AA	AA	BB	-	AA	BB	AA	BB	BB	AA	BB	AA	AA	BB	AA	BB	AA	BB
5_114302342	BB	AA	BB	AA	BB	AB	AA	AA	BB	BB	AA	AA	BB	AA	AA	AA	BB	AA	BB	AB	AA	BB	BB	BB	AA	BB	AA	AA	BB	AA	BB	AA	AA	BB	BB	AA	BB	AA	BB	BB	AA	BB	AA	AA	-	-	BB	-	BB
5_129726521	BB	AA	BB	AA	BB	AB	AA	AA	BB	BB	AA	AA	BB	AA	AA	AA	BB	BB	BB	AB	BB	BB	BB	BB	AA	BB	AA	AA	BB	AA	BB	AA	BB	BB	AB	AA	BB	AA	BB	BB	AA	BB	AA	AA	BB	BB	AA	AA	BB
5_130151850	-	AA	BB	AA	BB	AB	AA	AA	BB	BB	AA	AA	BB	AA	AA	AA	BB	BB	BB	AB	BB	BB	BB	BB	AA	BB	AA	AA	BB	AA	BB	AA	BB	BB	-	AA	BB	AA	BB	BB	AA	BB	AA	AA	BB	BB	AA	AA	BB
5_130151895	-	AA	BB	AA	BB	AB	AA	AA	BB	BB	AA	AA	BB	AA	AA	AA	BB	BB	BB	AB	BB	BB	BB	BB	AA	BB	AA	AA	BB	AA	BB	AA	BB	BB	-	AA	BB	AA	BB	BB	AA	BB	AA	AA	BB	BB	AA	AA	BB
5_138731366	BB	AA	BB	AA	BB	AB	AA	AA	BB	BB	AA	AA	BB	AA	BB	AA	AA	BB	BB	AB	BB	BB	BB	BB	AA	BB	AA	AA	BB	AA	BB	AA	BB	BB	AB	AA	BB	AA	BB	BB	AA	BB	AA	AA	BB	BB	AA	AA	BB
5_143744442	BB	AA	BB	AA	BB	BB	BB	AA	BB	BB	AA	AA	BB	AA	BB	AA	AA	BB	BB	AB	BB	BB	BB	BB	AA	BB	AA	AA	BB	AA	BB	AA	BB	BB	AB	AA	BB	AA	BB	BB	AA	BB	BB	AA	BB	BB	AA	AA	BB
5_144586350	BB	AA	BB	AA	BB	BB	BB	AA	BB	BB	AA	AA	BB	AA	BB	AA	AA	BB	BB	AB	BB	BB	BB	BB	AA	BB	AA	AA	BB	AA	BB	AA	BB	BB	AB	AA	BB	AA	BB	BB	AA	BB	BB	AA	BB	BB	AA	AA	BB
5_144586359	BB	AA	BB	AA	BB	BB	BB	AA	BB	BB	AA	AA	BB	AA	BB	AA	AA	BB	BB	AB	BB	BB	BB	BB	AA	BB	AA	AA	BB	AA	BB	AA	BB	BB	AB	AA	BB	AA	BB	BB	AA	BB	BB	AA	BB	BB	AA	AA	BB
5_144818084	BB	AA	BB	AA	BB	BB	BB	AA	BB	BB	AA	AA	BB	AA	BB	AA	AA	BB	BB	AB	BB	BB	BB	BB	AA	BB	AA	AA	BB	AA	BB	AA	BB	BB	AB	AA	BB	AA	BB	BB	AA	BB	BB	AA	BB	BB	AA	AA	BB
5_144818105	BB	AA	BB	AA	BB	BB	BB	AA	BB	BB	AA	AA	BB	AA	BB	AA	AA	BB	BB	AB	BB	BB	BB	BB	AA	BB	AA	AA	BB	AA	BB	AA	BB	BB	AB	AA	BB	AA	BB	BB	AA	BB	BB	AA	BB	BB	AA	AA	BB
5_145840067	BB	AA	BB	AA	BB	BB	BB	AA	BB	BB	AA	AA	BB	AA	BB	AA	AA	BB	BB	AB	BB	BB	BB	BB	AA	BB	AA	AA	BB	AA	BB	AA	BB	BB	AB	AA	BB	AA	BB	BB	AA	BB	BB	AA	BB	BB	AA	BB	BB
5_152887138	BB	AA	BB	AA	BB	BB	BB	AA	BB	BB	AA	AA	BB	AA	BB	AA	AA	BB	BB	AB	BB	BB	BB	BB	AA	BB	AA	AA	BB	AA	BB	AA	BB	BB	AB	BB	BB	AA	BB	BB	AA	AA	BB	-	-	BB	AA	BB	-
5_152887147	BB	AA	BB	AA	BB	BB	BB	AA	BB	BB	AA	AA	BB	AA	BB	AA	AA	BB	BB	AB	BB	BB	BB	BB	AA	BB	AA	AA	BB	AA	BB	AA	BB	BB	AB	BB	BB	AA	BB	BB	AA	AA	BB	-	-	BB	AA	BB	-
5_154772103	BB	AA	BB	AA	BB	BB	BB	AA	BB	BB	AA	AA	BB	AA	BB	AA	AB	BB	BB	BB	BB	BB	BB	BB	AA	BB	AA	AB	BB	AA	BB	AA	BB	BB	AA	BB	BB	AA	BB	BB	AA	AA	BB	AA	BB	AA	AA	BB	BB
5_164550754	AA	AA	AA	AA	BB	BB	BB	AA	BB	BB	AA	AA	BB	AA	BB	AA	AB	AA	BB	BB	BB	BB	BB	AA	AA	BB	AA	AB	BB	AA	BB	AA	BB	BB	AB	BB	BB	AA	AA	BB	AA	AA	BB	AA	BB	AA	AA	BB	BB
5_164817736	AA	AA	AA	AA	BB	BB	BB	AA	BB	BB	AA	AA	BB	AA	BB	AA	AB	AA	BB	BB	BB	BB	BB	AA	AA	BB	AA	AB	BB	AA	BB	AA	BB	BB	AB	BB	BB	AA	AA	BB	AA	AA	BB	AA	AB	AA	AA	BB	BB
5_165000254	AA	AA	AA	AA	BB	BB	BB	AA	BB	BB	AA	AA	BB	AA	BB	AA	AB	AA	BB	BB	BB	BB	BB	AA	AA	BB	AA	AB	BB	AA	BB	AA	BB	BB	AB	BB	BB	AA	AA	BB	AA	AA	BB	AA	BB	AA	AA	BB	BB
5_165000335	AA	AA	AA	AA	BB	BB	BB	AA	BB	BB	AA	AA	BB	AA	BB	AA	AB	AA	BB	BB	BB	BB	BB	AA	AA	BB	AA	AB	BB	AA	BB	AA	BB	BB	AB	BB	BB	AA	AA	BB	AA	AA	BB	AA	BB	AA	AA	BB	BB
5_165172920	AA	AA	AA	AA	BB	BB	BB	AA	BB	BB	AA	AA	BB	AA	BB	AA	AB	AA	BB	BB	BB	BB	BB	AA	AA	BB	AA	AB	BB	AA	BB	AA	BB	BB	BB	BB	BB	AA	AA	BB	-	AA	BB	AA	BB	AB	AA	BB	BB
5_168456609	AA	AA	AA	AA	-	BB	BB	AA	BB	BB	AA	AA	BB	AA	BB	AA	AB	AA	BB	BB	BB	BB	BB	AA	AA	BB	AA	AB	BB	AA	BB	AA	BB	BB	AB	BB	BB	AA	AA	BB	AA	AA	BB	AA	BB	AA	AA	BB	BB
5_175278721	AA	AA	AA	AA	BB	BB	BB	AA	BB	BB	AA	AA	BB	AA	BB	AA	AB	AA	AA	BB	BB	BB	BB	AA	AA	AA	AA	AA	BB	AA	AA	AA	BB	BB	AB	BB	BB	AA	AA	BB	AA	AA	BB	AA	BB	AA	AA	AA	BB
5_177278687	AA	AA	AA	AA	BB	BB	BB	AA	BB	BB	AA	AA	BB	AA	BB	AA	BB	AA	AA	BB	BB	BB	BB	AA	AA	AA	BB	AA	BB	AA	AA	AA	BB	BB	-	BB	BB	AA	AA	BB	AA	AA	BB	AA	AA	AA	AA	AA	BB
5_182223536	AA	AA	AA	AA	BB	BB	BB	AA	BB	BB	AA	AA	BB	AA	BB	AA	BB	AA	AA	BB	AA	BB	BB	AA	AA	AA	BB	AA	BB	AA	AA	AA	BB	BB	AB	BB	BB	AA	AA	BB	AA	AA	BB	BB	AA	AA	AA	AA	BB
5_185956153	AA	AA	AA	AA	BB	BB	BB	AA	BB	BB	AA	AA	BB	AA	BB	AA	BB	AA	AA	BB	AA	AB	BB	AA	AA	AA	BB	AA	BB	AA	AA	AA	BB	BB	AB	BB	BB	AA	AA	BB	AA	AA	BB	BB	AA	AA	BB	AA	BB
5_188720330	AA	AA	AA	AA	BB	BB	BB	AA	BB	BB	AA	AA	AB	AA	BB	AA	BB	-	AA	BB	AA	AB	BB	AA	AA	AA	BB	AA	BB	AA	AA	AA	BB	BB	AB	BB	BB	AA	AA	BB	AA	AA	BB	BB	AA	AA	BB	AA	BB
5_198459982	BB	AA	AB	AA	BB	BB	BB	AA	AA	BB	AA	AA	AA	AA	BB	AA	BB	AA	AA	BB	BB	AB	BB	AA	AA	AA	BB	AA	AA	AA	AA	AA	BB	BB	BB	BB	BB	AA	AA	BB	AA	AA	BB	BB	AA	AB	BB	AA	BB
5_199224986	BB	AA	BB	AA	BB	BB	BB	AA	AA	BB	AA	AA	AA	AA	BB	AA	BB	AA	AA	BB	BB	AB	BB	AA	AA	AA	BB	AA	AA	AA	AA	AA	BB	BB	BB	BB	BB	AA	AA	BB	AA	AA	BB	BB	AA	AA	BB	AA	BB
5_199431223	BB	AA	AB	AA	BB	BB	BB	AA	AA	BB	AA	AA	AA	AA	BB	AA	BB	AA	AA	BB	BB	AB	BB	AA	AA	AA	BB	AA	AA	AA	AA	AA	BB	BB	BB	BB	BB	AA	AA	BB	AA	AA	BB	BB	AA	AA	BB	AA	BB
5_200196528	BB	AA	AB	AA	BB	BB	BB	AA	AA	BB	AA	AA	AA	AA	BB	AA	BB	AA	AA	BB	BB	AB	BB	AA	AA	AA	BB	AA	AA	AA	AA	AA	BB	BB	BB	BB	BB	AA	AA	BB	AA	AA	BB	BB	AA	AA	BB	AA	BB
5_200438331	BB	AA	AB	AA	BB	BB	BB	AA	AA	BB	AA	AA	AA	AA	BB	AA	BB	AA	AA	BB	BB	AB	BB	AA	AA	AA	BB	AA	AA	AA	AA	AA	BB	BB	BB	BB	BB	AA	AA	BB	AA	AA	BB	BB	AA	AA	BB	AA	BB
5_200951472	BB	AA	AB	AA	BB	BB	BB	AA	AA	BB	AA	AA	AA	AA	BB	AA	BB	AA	AA	BB	BB	AB	BB	AA	AA	AA	BB	AA	AA	AA	AA	AA	BB	BB	BB	BB	BB	AA	AA	BB	AA	AA	BB	BB	AA	AA	BB	AA	BB
5_200952678	BB	AA	AB	AA	BB	BB	BB	AA	AA	BB	AA	AA	AA	AA	BB	AA	BB	AA	AA	BB	BB	AB	BB	AA	AA	AA	BB	AA	AA	AA	AA	AA	BB	BB	BB	BB	BB	AA	AA	BB	AA	AA	BB	BB	AA	AA	BB	AA	BB
5_201127570	BB	AA	BB	AA	BB	BB	BB	AA	AA	BB	AA	AA	AA	AA	BB	AA	BB	AA	AA	BB	BB	AB	BB	AA	AA	AA	BB	AA	AA	AA	AA	AA	BB	BB	BB	BB	BB	AA	AA	BB	AA	AA	BB	BB	AA	AA	BB	AA	BB
5_201300091	BB	AA	BB	AA	BB	BB	BB	AA	AA	BB	AA	AA	AA	AA	BB	AA	BB	AA	AA	BB	BB	AB	BB	AA	AA	AA	BB	AA	AA	AA	AA	AA	BB	BB	BB	BB	BB	AA	AA	BB	AA	AA	BB	BB	AA	AA	BB	AA	BB
5_201302513	BB	AA	BB	AA	BB	BB	BB	AA	AA	BB	AA	AA	AA	AA	BB	AA	BB	AA	AA	BB	BB	AB	BB	AA	AA	AA	BB	AA	AA	AA	AA	AA	BB	BB	BB	BB	BB	AA	AA	BB	AA	AA	BB	BB	AA	AA	BB	AA	BB
5_202216309	BB	AA	BB	AA	BB	BB	BB	AA	AA	BB	AA	AA	AA	AA	BB	AA	BB	AA	AA	BB	BB	AB	BB	AA	AA	AA	BB	AA	AA	AA	AA	AA	BB	BB	BB	BB	BB	AA	AA	BB	AA	AA	BB	BB	AA	AA	BB	AA	BB
5_202216359	BB	AA	BB	AA	BB	BB	BB	AA	AA	BB	AA	AA	AA	AA	BB	AA	BB	AA	AA	BB	BB	AB	BB	AA	AA	AA	BB	AA	AA	AA	AA	AA	BB	BB	BB	BB	BB	AA	AA	BB	AA	AA	BB	BB	AA	AA	BB	AA	BB
5_203783294	BB	AA	BB	AA	BB	BB	BB	AA	AA	BB	AA	AA	AA	AA	BB	AA	BB	AA	AA	BB	BB	AB	BB	AA	AA	AA	BB	AA	AA	AA	AA	AA	BB	BB	BB	BB	BB	AA	AA	BB	AA	AA	BB	BB	AA	AA	BB	AA	BB
5_203817027	BB	AA	BB	AA	BB	BB	BB	AA	AA	BB	AA	AA	AA	AA	BB	AA	BB	AA	AA	BB	BB	AB	BB	AA	AA	AA	BB	AA	AA	AA	AA	AA	BB	BB	BB	BB	BB	AA	AA	BB	AA	AA	BB	BB	AA	AA	BB	AA	BB
5_203853711	BB	AA	BB	AA	BB	BB	BB	AA	AA	BB	AA	AA	AA	AA	BB	AA	BB	AA	AA	BB	BB	AB	BB	AA	AA	AA	BB	AA	AA	AA	AA	AA	BB	BB	BB	BB	BB	AA	AA	BB	AA	AA	BB	BB	AA	AA	BB	AA	BB
5_207856683	BB	AA	BB	AA	AA	BB	BB	AA	AA	BB	AA	AA	AA	AA	BB	AA	BB	AA	AB	BB	BB	AB	BB	AA	AA	AA	BB	AA	AA	AA	AA	AA	BB	BB	BB	BB	BB	AA	AA	BB	AA	AA	BB	BB	AA	AA	BB	AA	BB
5_207903217	BB	AA	BB	AA	AA	BB	BB	AA	AA	BB	AA	AA	AA	AA	BB	AA	BB	AA	AB	BB	BB	AB	BB	AA	AA	AA	BB	AA	AA	AA	AA	AA	BB	BB	BB	BB	BB	AA	AA	BB	AA	AA	BB	BB	AA	AA	BB	AA	BB
5_208006735	BB	AA	-	AA	AA	BB	BB	AA	AA	BB	AA	AA	AA	AA	BB	AA	BB	AA	AB	BB	BB	AB	BB	AA	AA	AA	BB	AA	AA	AA	AA	AA	BB	BB	BB	BB	BB	AA	AA	BB	AA	AA	BB	BB	AA	AA	BB	AA	BB
5_210936402	BB	AA	BB	AA	AA	BB	BB	AA	AA	BB	AA	AA	AA	AA	BB	AA	BB	AA	AB	BB	BB	AB	BB	AA	AA	AA	BB	AA	AA	AA	AA	AA	BB	BB	BB	BB	BB	AA	AA	BB	AA	AA	BB	BB	AA	AA	BB	AA	BB
5_211141372	BB	AA	BB	AA	AA	BB	BB	AA	AA	BB	AA	AA	AA	AA	BB	AA	BB	AA	AB	BB	BB	AB	BB	AA	AA	AA	BB	AA	AA	AA	AA	AA	BB	BB	BB	BB	BB	AA	AA	BB	AA	AA	BB	BB	AA	AA	BB	AA	BB
5_211142462	BB	AA	BB	AA	AA	BB	BB	AA	AA	BB	AA	AA	AA	AA	BB	AA	BB	AA	AB	BB	BB	AB	BB	AA	AA	AA	BB	AA	AA	AA	AA	AA	BB	BB	BB	BB	BB	AA	AA	BB	AA	AA	BB	BB	AA	AA	BB	AA	BB
5_211236478	BB	AA	BB	AA	AA	BB	BB	AA	AA	BB	AA	AA	AA	AA	BB	AA	BB	AA	AB	BB	BB	AB	BB	AA	AA	AA	BB	AA	AA	AA	AA	AA	BB	BB	BB	BB	BB	AA	AA	BB	AA	AA	BB	BB	AA	AA	BB	AA	BB
5_211236541	BB	AA	BB	AA	AA	BB	BB	AA	AA	BB	AA	AA	AA	AA	BB	AA	BB	AA	AB	BB	BB	AB	BB	AA	AA	AA	BB	AA	AA	AA	AA	AA	BB	BB	BB	BB	BB	AA	AA	BB	AA	AA	BB	BB	AA	AA	BB	AA	BB
5_211236570	BB	AA	BB	AA	AA	BB	BB	AA	AA	BB	AA	AA	AA	AA	BB	AA	BB	AA	AB	BB	BB	AB	BB	AA	AA	AA	BB	AA	AA	AA	AA	AA	BB	BB	BB	BB	BB	AA	AA	BB	AA	AA	BB	BB	AA	AA	BB	AA	BB
5_211236579	BB	AA	BB	AA	AA	BB	BB	AA	AA	BB	AA	AA	AA	AA	BB	AA	BB	AA	AB	BB	BB	AB	BB	AA	AA	AA	BB	AA	AA	AA	AA	AA	BB	BB	BB	BB	BB	AA	AA	BB	AA	AA	BB	BB	AA	AA	BB	AA	BB
5_211236585	BB	AA	BB	AA	AA	BB	BB	AA	AA	BB	AA	AA	AA	AA	BB	AA	BB	AA	AB	BB	BB	AB	BB	AA	AA	AA	BB	AA	AA	AA	AA	AA	BB	BB	BB	BB	BB	AA	AA	BB	AA	AA	BB	BB	AA	AA	BB	AA	BB
5_213577133	BB	AA	BB	AA	AA	BB	BB	AA	AA	BB	AA	AA	AA	AA	BB	AA	BB	AA	AB	BB	BB	AB	BB	AA	AA	AA	BB	AA	AA	AA	AA	AA	BB	BB	BB	BB	BB	AA	AA	BB	AA	AA	BB	BB	AA	AA	BB	AA	BB
5_215191386	BB	AA	BB	AA	AA	BB	BB	AA	AA	BB	AA	AA	AA	AA	BB	AA	BB	AA	AB	BB	BB	AB	BB	AA	AA	AA	BB	AA	AA	AA	AA	AA	BB	BB	BB	BB	BB	AA	AA	BB	AA	AA	BB	BB	AA	AA	BB	AA	BB
5_215191445	BB	AA	BB	AA	AA	BB	BB	AA	AA	BB	AA	AA	AA	AA	BB	AA	BB	AA	AB	BB	BB	AB	BB	AA	AA	AA	BB	AA	AA	AA	AA	AA	BB	BB	BB	BB	BB	AA	AA	BB	AA	AA	BB	BB	AA	AA	BB	AA	BB
5_215261605	BB	AA	BB	AA	AA	BB	BB	AA	AA	BB	AA	AA	AA	AA	BB	AA	BB	AA	AB	BB	BB	AB	BB	AA	AA	AA	BB	AA	AA	AA	AA	AA	BB	BB	BB	BB	BB	AA	AA	BB	AA	AA	BB	BB	AA	AA	BB	AA	BB
5_215601331	BB	AA	BB	AA	AA	BB	BB	AA	AA	BB	AA	AA	AA	AA	BB	AA	BB	AA	AB	BB	BB	AB	BB	AA	AA	AA	BB	AA	AA	AA	AA	AA	BB	BB	BB	BB	BB	AA	AA	BB	AA	AA	BB	BB	AA	AA	BB	AA	BB
5_216525694	BB	AA	BB	AA	AA	AA	BB	AA	AA	BB	AA	AA	AA	AA	BB	AA	BB	AA	AB	BB	BB	AB	BB	AA	AA	AA	BB	AA	AA	AA	AA	AA	BB	BB	BB	BB	BB	AA	AA	BB	AA	AA	BB	BB	AA	AA	BB	AA	-
5_216525778	BB	AA	BB	AA	AA	AA	BB	AA	AA	BB	AA	AA	AA	AA	BB	AA	BB	AA	AB	BB	BB	AB	BB	AA	AA	AA	BB	AA	AA	AA	AA	AA	BB	BB	BB	BB	BB	AA	AA	BB	AA	AA	BB	-	AA	AA	BB	AA	BB
5_216525780	BB	AA	BB	AA	AA	AA	BB	AA	AA	BB	AA	AA	AA	AA	BB	AA	BB	AA	AB	BB	BB	AB	BB	AA	AA	AA	BB	AA	AA	AA	AA	AA	BB	BB	BB	BB	BB	AA	AA	BB	AA	AA	BB	-	AA	AA	BB	AA	BB
5_216526851	BB	AA	BB	AA	AA	AA	BB	AA	AA	BB	AA	AA	AA	AA	BB	AA	BB	AA	AB	BB	BB	AB	BB	AA	AA	AA	BB	AA	AA	AA	AA	AA	BB	BB	BB	BB	BB	AA	AA	BB	AA	AA	BB	BB	AA	AA	BB	AA	BB
5_216528609	BB	AA	BB	AA	AA	AA	BB	AA	AA	BB	AA	AA	AA	AA	BB	AA	BB	AA	AB	BB	BB	AB	BB	AA	AA	AA	BB	AA	AA	AA	AA	AA	BB	BB	BB	BB	BB	AA	AA	BB	AA	AA	BB	BB	AA	AA	BB	AA	BB
5_216530813	BB	AA	BB	AA	AA	AA	BB	AA	AA	BB	AA	AA	AA	AA	BB	AA	BB	AA	AB	BB	BB	AB	BB	AA	AA	AA	BB	AA	AA	AA	AA	AA	BB	BB	BB	BB	BB	AA	AA	BB	AA	AA	BB	BB	AA	AB	BB	AA	-
5_216531248	BB	AA	BB	AA	AA	AA	BB	AA	AA	BB	AA	AA	AA	AA	BB	AA	BB	AA	AB	BB	BB	AB	BB	AA	AA	AA	BB	AA	AA	AA	AA	AA	BB	BB	BB	BB	BB	AA	AA	BB	AA	AA	BB	BB	AA	AB	BB	AA	BB
5_216531485	BB	AA	BB	AA	AA	AA	BB	AA	AA	BB	AA	AA	AA	AA	BB	AA	BB	AA	AB	BB	BB	AB	BB	AA	AA	AA	BB	AA	AA	AA	AA	AA	BB	BB	BB	BB	BB	AA	AA	BB	AA	AA	BB	BB	AA	AA	BB	AA	BB
5_216531518	BB	AA	BB	AA	AA	AA	BB	AA	AA	BB	AA	AA	AA	AA	BB	AA	BB	AA	AB	BB	BB	AB	BB	AA	AA	AA	BB	AA	AA	AA	AA	AA	BB	BB	BB	BB	BB	AA	AA	BB	AA	AA	BB	BB	AA	AA	BB	AA	BB
5_216531545	BB	AA	BB	AA	AA	AA	BB	AA	AA	BB	AA	AA	AA	AA	BB	AA	BB	AA	AB	BB	BB	AB	BB	AA	AA	AA	BB	AA	AA	AA	AA	AA	BB	BB	BB	BB	BB	AA	AA	BB	AA	AA	BB	BB	AA	AA	BB	AA	BB
5_216557887	BB	AA	BB	AA	AA	AA	BB	AA	AA	BB	AA	AA	AA	AA	BB	AA	BB	AA	BB	BB	BB	AB	BB	AA	AA	AA	BB	AA	AA	AA	AA	AA	BB	BB	BB	BB	BB	AA	AA	BB	AA	AA	BB	BB	AA	AA	BB	AA	BB
5_216562139	BB	AA	BB	AA	AA	AA	BB	AA	AA	BB	AA	AA	AA	AA	BB	AA	BB	AA	AB	BB	BB	AB	BB	AA	AA	AA	BB	AA	AA	AA	AA	AA	BB	BB	BB	BB	BB	AA	AA	BB	AA	AA	BB	BB	AA	AA	BB	AA	BB
5_218278151	BB	AA	BB	AA	AA	AA	BB	AA	AA	BB	AA	AA	AA	AA	BB	AA	BB	AA	AB	BB	BB	AB	BB	AA	AA	AA	BB	AA	AA	AA	AA	AA	BB	AA	BB	BB	BB	AA	AA	BB	AA	AA	BB	BB	AA	AA	BB	AA	BB
5_218633597	BB	AA	BB	AA	AA	AA	BB	AA	AA	BB	AA	AA	AA	AA	BB	AA	BB	AA	AB	BB	BB	AB	BB	AA	AA	AA	BB	AA	AA	AA	AA	AA	BB	AA	BB	BB	BB	AA	AA	BB	AA	AA	BB	BB	AA	AA	BB	AA	-
5_218633623	BB	AA	BB	AA	AA	AA	BB	AA	AA	BB	AA	AA	AA	AA	BB	AA	BB	AA	AB	BB	BB	AB	BB	AA	AA	AA	BB	AA	AA	AA	AA	AA	BB	AA	BB	BB	BB	AA	AA	BB	AA	AA	BB	BB	AA	AA	BB	AA	-
5_218633624	BB	AA	BB	AA	AA	AA	BB	AA	AA	BB	AA	AA	AA	AA	BB	AA	BB	AA	AB	BB	BB	AB	BB	AA	AA	AA	BB	AA	AA	AA	AA	AA	BB	AA	BB	BB	BB	AA	AA	BB	AA	AA	BB	BB	AA	AA	BB	AA	-
5_218633657	BB	AA	BB	AA	AA	AA	BB	AA	AA	BB	AA	AA	AA	AA	BB	AA	BB	AA	AB	BB	BB	AB	BB	AA	AA	AA	BB	AA	AA	AA	AA	AA	BB	AA	BB	BB	BB	AA	AA	BB	AA	AA	BB	BB	AA	AA	BB	AA	-
5_218642631	BB	AA	BB	AA	AA	AA	BB	AA	AA	BB	AA	AA	AA	AA	BB	AA	BB	AA	AB	BB	BB	AB	BB	AA	AA	AA	BB	AA	AA	AA	AA	AA	BB	AA	BB	BB	BB	AA	AA	BB	AA	AA	BB	BB	AA	AA	BB	AA	BB
5_225707829	AB	AA	BB	AA	AA	AA	BB	AA	AA	BB	AA	AA	AA	AA	BB	AA	AA	AA	AB	AA	BB	BB	BB	AA	AA	AA	BB	AA	BB	AA	AA	AA	AA	AA	BB	BB	BB	AA	AA	BB	AA	BB	BB	-	-	AA	BB	AA	BB
5_226822981	AB	AA	BB	AA	AA	AA	BB	AA	AA	BB	AA	AA	AA	AA	BB	AA	AA	AA	AB	AA	BB	BB	BB	AA	AA	AA	BB	AA	BB	AA	AA	AA	AA	AA	BB	BB	BB	AA	AA	BB	AA	BB	BB	BB	AA	AA	BB	AA	BB
5_226891443	AB	AA	BB	AA	AA	AA	BB	AA	AA	BB	AA	AA	AA	AA	BB	AA	AA	AA	AB	AA	BB	BB	BB	AA	AA	AA	BB	AA	BB	AA	AA	AA	AA	AA	BB	BB	BB	AA	AA	BB	AA	BB	BB	BB	AA	AA	BB	AA	BB
5_226936580	AB	AA	BB	AA	AA	AA	BB	AA	AA	BB	AA	AA	AA	AA	BB	AA	AA	AA	AB	AA	BB	BB	BB	AA	AA	AA	BB	AA	BB	AA	AA	AA	AA	AA	BB	BB	BB	AA	AA	BB	AA	BB	BB	BB	AA	AA	BB	AA	BB
5_227704987	AB	AA	BB	AA	AA	AA	BB	AA	AA	BB	AA	AA	AA	AA	BB	AA	AA	AA	AB	AA	BB	BB	BB	AA	AA	AA	BB	AA	BB	AA	AA	AA	AA	AA	BB	BB	BB	AA	AA	BB	AA	BB	BB	BB	AA	AA	BB	AA	BB
5_227721691	AB	AA	BB	AA	AA	AA	BB	AA	AA	BB	AA	AA	AA	AA	BB	AA	AA	AA	AB	AA	BB	BB	BB	AA	AA	AA	BB	AA	BB	AA	AA	AA	AA	AA	BB	BB	BB	AA	AA	BB	AA	BB	BB	BB	AA	AA	BB	AA	BB
5_227958888	AB	AA	BB	AA	AA	AA	BB	AA	AA	BB	AA	AA	AA	AA	BB	AA	AA	AA	AB	AA	BB	BB	BB	AA	AA	AA	BB	AA	BB	AA	AA	AA	AA	AA	BB	BB	BB	AA	AA	BB	AA	BB	BB	BB	AA	AA	BB	AA	BB
5_227958899	AB	AA	BB	AA	AA	AA	BB	AA	AA	BB	AA	AA	AA	AA	BB	AA	AA	AA	AB	AA	BB	BB	BB	AA	AA	AA	BB	AA	BB	AA	AA	AA	AA	AA	AB	BB	BB	AA	AA	BB	AA	BB	BB	BB	AA	AA	BB	AA	BB
5_228607078	AB	AA	BB	AA	AA	AA	BB	AA	AA	BB	AA	AA	AA	AA	BB	AA	AA	AA	AB	AA	BB	BB	BB	AA	AA	AA	BB	AA	BB	AA	AA	AA	AA	AA	BB	BB	BB	AA	AA	BB	AA	BB	BB	BB	AA	AA	BB	AA	BB
5_228607095	AB	AA	BB	AA	AA	AA	BB	AA	AA	BB	AA	AA	AA	AA	BB	AA	AA	AA	AB	AA	BB	BB	BB	AA	AA	AA	BB	AA	BB	AA	AA	AA	AA	AA	BB	BB	BB	AA	AA	BB	AA	BB	BB	BB	AA	AA	BB	AA	BB
5_229331832	AB	AA	BB	AA	AA	AA	BB	AA	AA	BB	AA	AA	AA	AA	BB	AA	AA	AA	AB	AA	BB	BB	BB	AA	AA	AA	BB	AA	BB	AA	AA	AA	AA	AA	BB	BB	BB	AA	AA	BB	AA	BB	BB	BB	AA	AA	BB	AA	BB
5_229331843	AB	AA	BB	AA	AA	AA	BB	AA	AA	BB	AA	AA	AA	AA	BB	AA	AA	AA	AB	AA	BB	BB	BB	AA	AA	AA	BB	AA	BB	AA	AA	AA	AA	AA	AB	BB	BB	AA	AA	BB	AA	BB	BB	BB	AA	AA	BB	AA	BB
5_229444723	AB	AA	BB	AA	AA	AA	BB	AA	AA	BB	AA	AA	AA	AA	BB	AA	AA	AA	AB	AA	BB	BB	BB	AA	AA	AA	BB	AA	BB	AA	AA	AA	AA	AA	BB	BB	BB	AA	AA	BB	AA	BB	BB	BB	AA	AA	BB	AA	BB
5_230461922	AB	AA	BB	AA	AA	AA	BB	AA	AA	BB	AA	AA	AA	AA	BB	AA	AA	AA	BB	AA	AA	BB	BB	AA	AA	AA	BB	AA	BB	AA	AA	AA	AA	AA	-	BB	BB	AA	AA	BB	AA	BB	BB	BB	AA	AA	BB	AA	BB
5_230655553	AB	AA	BB	AA	AA	AA	BB	AA	AA	BB	AA	AA	AA	AA	BB	AA	AA	AA	BB	AA	AA	BB	BB	AA	AA	AA	BB	AA	BB	AA	AA	AA	AA	AA	BB	BB	BB	AA	AA	BB	AA	BB	BB	BB	AA	AA	BB	AA	BB
5_231899235	AB	AA	BB	AA	AA	AA	BB	AA	AA	BB	AA	AA	AA	AA	BB	AA	AA	AA	BB	AA	AA	BB	BB	AA	AA	AA	BB	AA	BB	AA	AA	AA	AA	AA	BB	BB	BB	AA	AA	BB	AA	BB	BB	BB	AA	AA	BB	AA	BB
5_232013801	AB	AA	BB	AA	AA	AA	BB	AA	AA	BB	AA	AA	AA	AA	BB	AA	AA	AA	BB	AA	AA	BB	BB	AA	AA	AA	BB	AA	BB	AA	AA	AA	AA	AA	BB	BB	BB	AA	AA	BB	AA	BB	BB	BB	AA	AA	BB	AA	BB
5_232131802	AB	AA	BB	AA	AA	AA	BB	AA	AA	BB	AA	AA	AA	AA	BB	AA	AA	AA	BB	AA	AA	BB	BB	AA	AA	AA	BB	AA	BB	AA	AA	AA	AA	AA	BB	BB	BB	AA	AA	BB	AA	BB	BB	BB	AA	AA	BB	AA	BB
5_233204503	AB	AA	BB	AA	AA	AA	BB	AA	AA	BB	AA	AA	AA	AA	BB	AA	AA	AA	BB	AA	AA	BB	BB	AA	AA	AA	BB	AA	BB	AA	AA	AA	AA	AA	BB	BB	BB	AA	AA	BB	AA	BB	BB	-	AA	AA	BB	AA	BB
5_233343152	AB	AA	BB	AA	AA	AA	BB	AA	AA	BB	AA	AA	AA	AA	BB	AA	AA	AA	BB	AA	AA	BB	BB	AA	AA	AA	BB	AA	BB	AA	AA	AA	AA	AA	BB	BB	BB	AA	AA	BB	AA	BB	BB	BB	AA	AA	BB	AA	BB
5_235668707	AB	AA	BB	AA	AA	AA	BB	AA	AA	BB	AA	AA	AA	AA	BB	AA	AA	AA	BB	AA	AA	BB	BB	AA	AA	AA	BB	AA	BB	AA	AA	AA	AA	AA	BB	BB	BB	AA	AA	BB	AA	BB	AA	AA	AA	AA	AA	AA	BB
5_235668724	AB	AA	BB	AA	AA	AA	BB	AA	AA	BB	AA	AA	AA	AA	BB	AA	AA	AA	BB	AA	AA	BB	BB	AA	AA	AA	BB	AA	BB	AA	AA	AA	AA	AA	BB	BB	BB	AA	AA	BB	AA	BB	AA	AA	AA	AA	AA	AA	BB
5_235668744	AB	AA	BB	AA	AA	AA	BB	AA	AA	BB	AA	AA	AA	AA	BB	AA	AA	AA	BB	AA	AA	BB	BB	AA	AA	AA	BB	AA	BB	AA	AA	AA	AA	AA	BB	BB	BB	AA	AA	BB	AA	BB	AA	AA	AA	AA	AA	AA	BB
5_235668838	AB	AA	BB	AA	AA	AA	BB	AA	AA	BB	AA	AA	AA	AA	BB	AA	AA	AA	BB	AA	AA	BB	BB	AA	AA	AA	BB	AA	BB	AA	AA	AA	AA	AA	BB	BB	BB	AA	AA	BB	AA	BB	AA	AA	AA	AA	AA	AA	BB
5_235718801	AB	AA	BB	AA	AA	AA	BB	AA	AA	BB	AA	AA	AA	AA	BB	AA	AA	AA	BB	AA	AA	BB	BB	AA	AA	AA	BB	AA	BB	AA	AA	AA	AA	AA	BB	BB	BB	AA	AA	BB	AA	BB	AA	AA	AA	AA	AA	AA	BB
5_235718836	AB	AA	BB	AA	AA	AA	BB	AA	AA	BB	AA	AA	AA	AA	BB	AA	AA	AA	BB	AA	AA	BB	BB	AA	AA	AA	BB	AA	BB	AA	AA	AA	AA	AA	BB	BB	BB	AA	AA	BB	AA	BB	AA	AA	AA	AA	AA	AA	BB
5_235757659	AB	AA	BB	AA	AA	AA	BB	AA	AA	BB	AA	AA	AA	AA	BB	AA	AA	AA	BB	AA	AA	BB	BB	AA	AA	AA	BB	AA	BB	AA	AA	AA	AA	AA	BB	BB	BB	AA	AA	BB	AA	BB	AA	AA	AA	AA	AA	AA	BB
5_236006117	AB	AA	BB	AA	AA	AA	BB	AA	AA	BB	AA	AA	AA	AA	BB	AA	AA	AA	BB	AA	AA	BB	BB	AA	AA	AA	BB	AA	BB	AA	AA	AA	AA	AA	BB	BB	BB	AA	AA	BB	AA	BB	AA	AA	AA	AA	AA	AA	BB
5_236836794	AB	AA	BB	AA	AA	AA	BB	AA	AA	BB	AA	AA	AA	AA	BB	AA	AA	AA	BB	AA	AA	BB	BB	AA	AA	AA	BB	AA	BB	AA	AA	AA	AA	AA	BB	BB	BB	AA	AA	BB	-	BB	AA	AA	AA	AA	AA	AA	-
5_236855477	AB	AA	BB	AA	AA	AA	BB	AA	AA	BB	AA	AA	AA	AA	BB	AA	AA	AA	BB	AA	AA	BB	BB	AA	AA	AA	BB	AA	BB	AA	AA	AA	AA	AA	BB	BB	BB	AA	AA	BB	AA	BB	AA	AA	AA	AA	AA	AA	BB
5_236855570	AB	AA	BB	AA	AA	AA	BB	AA	AA	BB	AA	AA	AA	AA	BB	AA	AA	AA	BB	AA	AA	BB	BB	AA	AA	AA	BB	AA	BB	AA	AA	AA	AA	AA	BB	BB	BB	AA	AA	BB	AA	BB	AA	AA	AA	AA	AA	AA	BB
5_237597608	AB	AA	BB	AA	AA	AA	BB	AA	AA	BB	AA	AA	AA	AA	BB	AA	AA	AA	BB	AA	AA	BB	BB	AA	AA	AA	BB	AA	BB	AA	AA	AA	AA	AA	BB	BB	BB	AA	AA	BB	AA	BB	AA	AA	AA	AA	AA	AA	BB
5_237597767	AB	AA	BB	AA	AA	AA	BB	AA	AA	BB	AA	AA	AA	AA	BB	AA	AA	AA	BB	AA	AA	BB	BB	AA	AA	AA	BB	AA	BB	AA	AA	AA	AA	AA	BB	BB	BB	AA	AA	BB	AA	BB	AA	AA	AA	AA	AA	AA	BB
5_237697643	AB	AA	BB	AA	AA	AA	BB	AA	AA	BB	AA	AA	AA	AA	BB	AA	AA	AA	BB	AA	AA	BB	BB	AA	AA	AA	BB	AA	BB	AA	AA	AA	AA	AA	BB	BB	BB	AA	AA	BB	AA	BB	AA	AA	AA	AA	AA	AA	BB
5_238499359	AB	AA	BB	AA	AA	AA	BB	AA	AA	BB	BB	AA	AA	AA	-	AA	AA	AA	BB	AA	AA	BB	BB	AA	AA	AA	BB	AA	BB	AA	AA	AA	AA	AA	BB	BB	BB	AA	AA	BB	AA	BB	AA	AA	AA	AA	AA	AA	BB
5_238542497	AA	AA	BB	AA	AA	AA	BB	AA	AA	BB	AB	AA	AA	AA	BB	AA	AA	AA	BB	AA	AA	BB	BB	AA	AA	AA	BB	AA	BB	AA	AA	AA	AA	AA	BB	BB	BB	AA	AA	BB	AA	BB	AA	AA	AA	AA	AA	AA	-
5_238629335	AB	AA	BB	AA	AA	AA	BB	AA	AA	BB	AB	AA	AA	AA	BB	AA	AA	AA	BB	AA	AA	BB	AB	AA	AA	AA	BB	AA	BB	AA	AA	AA	AA	AA	BB	BB	BB	AA	AA	BB	AA	BB	AA	AA	AA	AA	AA	AA	BB
5_238985848	AA	AA	AA	AA	AA	AA	BB	AA	AA	BB	AB	AA	AA	AA	BB	AA	AA	AA	BB	AA	AA	BB	BB	AA	AA	AA	BB	AA	BB	AA	AA	AA	AA	AA	BB	BB	BB	AA	AA	BB	AA	BB	AA	AA	AA	AA	AA	AA	BB
5_239520681	-	AA	AA	AA	AA	AA	BB	AA	AA	BB	BB	AA	AA	AA	BB	AA	AA	AA	BB	AA	AA	BB	BB	AA	AA	AA	BB	AA	BB	AA	AA	AA	AA	AA	BB	BB	BB	AA	AA	BB	AA	BB	AA	AA	-	AA	AA	AA	BB
5_239520752	-	AA	AA	AA	AA	AA	BB	AA	AA	BB	BB	AA	AA	AA	BB	AA	AA	AA	BB	AA	AA	BB	BB	AA	AA	AA	BB	AA	BB	AA	AA	AA	AA	AA	BB	BB	BB	AA	AA	BB	AA	BB	AA	AA	-	AA	AA	AA	BB
5_239650993	AA	AA	AA	AA	AA	AA	BB	AA	AA	BB	AB	AA	AA	AA	BB	AA	AA	AA	BB	AA	AA	BB	BB	AA	AA	AA	BB	AA	BB	AA	AA	AA	AA	AA	BB	BB	BB	AA	AA	BB	AA	BB	AA	AA	AA	AA	AA	AA	BB
5_239904951	AA	AA	AA	AA	AA	AA	BB	AA	AA	BB	AB	AA	AA	AA	BB	AA	AA	AA	BB	AA	AA	BB	BB	AA	AA	AA	BB	AA	BB	AA	AA	AB	AA	AA	BB	BB	BB	AA	AA	BB	AA	BB	AA	AA	AA	AA	AA	AA	BB
5_240195246	AA	AA	AA	AA	AA	AA	BB	AA	AA	BB	BB	AA	AA	AA	BB	AA	AA	AA	BB	AA	AA	BB	BB	AA	AA	AA	BB	AA	BB	AA	AA	AB	AA	AA	BB	BB	BB	AA	AA	BB	AA	BB	AA	AA	AA	AA	AA	AA	BB
5_241043415	AA	AA	AA	AA	AA	AA	BB	AA	AA	BB	BB	AA	AA	AA	BB	AA	AA	AA	BB	AA	AA	BB	BB	AA	AA	AA	BB	AA	BB	AA	AA	AB	AA	AA	BB	BB	BB	AA	AA	BB	AA	BB	AA	AA	AA	AB	AA	AA	BB
5_241201051	AA	AA	AA	AA	AA	AA	BB	AA	AA	BB	BB	AA	AA	AA	BB	AA	AA	AA	BB	AA	AA	BB	BB	AA	AA	AA	BB	AA	BB	AA	AA	AB	AA	AA	BB	BB	BB	AA	AA	BB	AA	BB	AA	AA	AA	AA	AA	AA	-
5_241285031	AA	AA	AA	AA	AA	AA	BB	AA	AA	BB	BB	AA	AA	AA	BB	AA	AA	AA	BB	AA	AA	BB	BB	AA	AA	AA	BB	AA	BB	AA	AA	AB	AA	AA	BB	BB	BB	AA	AA	BB	AA	BB	AA	AA	AA	AA	AA	AA	BB
5_241442088	AA	AA	AA	AA	AA	AA	BB	AA	AA	BB	BB	AA	AA	AA	BB	AA	AA	AA	BB	AA	AA	BB	BB	AA	AA	AA	BB	AA	BB	AA	AA	AB	AA	AA	BB	BB	BB	AA	AA	BB	AA	BB	AA	-	AA	AA	AA	AA	BB
5_241442143	AA	AA	AA	AA	AA	AA	BB	AA	AA	BB	BB	AA	AA	AA	BB	AA	AA	AA	BB	AA	AA	BB	BB	AA	AA	AA	BB	AA	BB	AA	AA	AB	AA	AA	BB	BB	BB	AA	AA	BB	AA	BB	AA	-	AA	AA	AA	AA	BB
5_242048837	AA	AA	-	AA	AA	AA	BB	AA	AA	BB	BB	AA	AA	AA	BB	AA	AA	AA	BB	AA	AA	BB	BB	AA	AA	AA	BB	AA	BB	AA	AA	AB	AA	AA	BB	BB	BB	AA	AA	BB	AA	BB	AA	AA	AA	AA	AA	AA	BB
5_242601790	AA	AA	AA	AA	AA	AA	BB	AA	AA	BB	BB	AA	AA	AA	BB	AA	AA	AA	BB	AA	AA	BB	BB	AA	AA	-	BB	AA	BB	AA	AA	AB	AA	AA	BB	BB	BB	AA	AA	BB	AA	BB	AA	AA	AA	AA	AA	AA	BB
5_243089110	AA	AA	AA	AA	AA	AA	BB	AA	AA	BB	BB	AA	AA	AA	BB	AA	AA	AA	BB	AA	AA	AA	BB	AA	AA	AA	BB	AA	BB	AA	AA	AB	AA	AA	BB	BB	BB	AA	AA	BB	AA	BB	AA	AA	AA	AA	AA	AA	BB
5_243288054	AA	AA	AA	AA	AA	AA	BB	AA	AA	BB	BB	AA	AA	AA	BB	AA	AA	BB	BB	AA	AA	AA	BB	AA	AA	AA	BB	AA	AB	AA	AA	AB	AA	AA	BB	BB	AA	AA	AA	BB	AA	BB	AA	AA	AA	AA	AA	AA	BB
5_243288069	AA	AA	AA	AA	AA	AA	BB	AA	AA	BB	BB	AA	AA	AA	BB	AA	AA	BB	BB	AA	AA	AA	BB	AA	AA	AA	BB	AA	AB	AA	AA	AB	AA	AA	BB	BB	AA	AA	AA	BB	AA	BB	AA	AA	AA	AA	AA	AA	BB
5_246065299	AB	AA	AA	AA	AA	AA	BB	AA	AA	BB	BB	AA	AA	AA	BB	AA	AA	BB	BB	AA	AA	AA	BB	AA	AA	AA	BB	AA	BB	AA	AA	AB	AA	AA	BB	BB	AA	AA	AA	BB	AA	BB	AA	AA	AA	AA	AA	AA	BB
5_247762782	AB	AA	AA	AA	AA	AA	BB	AA	AA	BB	BB	AA	AA	AA	BB	AA	AA	BB	BB	AA	AA	AA	BB	AA	AA	AA	BB	AA	BB	AA	AA	AB	AA	AA	BB	BB	AA	AA	AA	AA	AA	BB	AA	AA	AA	AA	AA	AA	BB
5_247762868	AB	AA	AA	AA	AA	AA	BB	AA	AA	BB	BB	AA	AA	AA	BB	AA	AA	BB	BB	AA	AA	AA	BB	AA	AA	AA	BB	AA	BB	AA	AA	AB	AA	AA	BB	BB	AA	AA	AA	AA	AA	BB	AA	AA	AA	AA	AA	AA	BB
5_249540835	AA	AA	AA	AA	AA	AA	BB	AA	AA	BB	BB	AA	AA	AA	BB	AA	AA	BB	BB	AA	AA	AA	BB	AA	AA	AA	BB	AA	BB	AA	AA	AB	AA	AA	BB	BB	AA	AA	AA	AA	AA	BB	AA	AA	-	AA	AA	AA	BB
5_249540838	AA	AA	AA	AA	AA	AA	BB	AA	AA	BB	BB	AA	AA	AA	BB	AA	AA	BB	BB	AA	AA	AA	BB	AA	AA	AA	BB	AA	BB	AA	AA	AB	AA	AA	BB	BB	AA	AA	AA	AA	AA	BB	AA	AA	-	AA	AA	AA	BB
5_249540892	AA	AA	AA	AA	AA	AA	BB	AA	AA	BB	BB	AA	AA	AA	BB	AA	AA	BB	BB	AA	AA	AA	BB	AA	AA	AA	BB	AA	BB	AA	AA	AB	AA	AA	BB	BB	AA	AA	AA	AA	AA	BB	AA	AA	-	AA	AA	AA	BB
5_251177674	AB	AA	AA	AA	AA	AA	BB	AA	AA	BB	BB	AA	AA	AA	BB	AA	AA	BB	BB	AA	AA	AA	BB	AA	AA	AA	BB	AA	BB	AA	AA	AB	AA	AA	BB	BB	AA	AA	AA	AA	AA	BB	AA	AA	AA	AA	AA	AA	BB
5_251673006	AB	AB	AB	AB	BB	BB	AB	BB	BB	AB	AB	AB	BB	AB	-	BB	BB	AB	BB	BB	BB	AB	BB	BB	BB	BB	AB	AB	BB	BB	BB	AB	AB	AB	AA	BB	BB	BB	AB	BB	AB	BB	AB	AB	BB	BB	BB	AB	-
5_253350156	AA	AA	AA	AA	AA	AA	BB	-	AA	BB	BB	AA	AA	AA	BB	AA	AA	BB	BB	AA	AA	AA	BB	AA	AA	AA	BB	AA	BB	AA	AA	AB	AA	AA	BB	BB	AA	AA	AA	AA	AA	BB	AA	AA	AA	AA	AA	AA	BB
5_253462668	AA	AA	AA	AA	AA	AA	BB	AA	AA	BB	BB	AA	AA	AA	BB	AA	AA	BB	BB	AA	AA	AA	BB	AA	AA	AA	BB	AA	BB	AA	AA	AB	AA	AA	BB	BB	AA	AA	AA	AA	AA	BB	AA	AA	AA	AA	AA	AA	BB
5_253462746	AA	AA	AA	AA	AA	AA	BB	AA	AA	BB	BB	AA	AA	AA	BB	AA	AA	BB	BB	AA	AA	AA	BB	AA	AA	AA	BB	AA	BB	AA	AA	AB	AA	AA	BB	BB	AA	AA	AA	AA	AA	BB	AA	AA	AA	AA	AA	AA	BB
5_253569275	AA	AA	AA	AA	AA	AA	BB	AA	AA	BB	BB	AA	AA	AA	BB	AA	AA	BB	BB	AA	AA	AA	BB	AA	AA	AA	BB	AA	BB	AA	AA	AB	AA	AA	BB	BB	AA	AA	AA	AA	AA	BB	AA	AA	AA	AA	AA	AA	BB
5_253569932	AA	AA	AA	AA	AA	AA	BB	AA	AA	BB	BB	AA	AA	AA	BB	AA	AA	BB	BB	AA	AA	AA	BB	AA	AA	AA	BB	AA	BB	AA	AA	AB	AA	AA	BB	BB	AA	AA	AA	AA	AA	BB	AA	AA	AA	AA	AA	AA	BB
5_253569956	AA	AA	AA	AA	AA	AA	BB	AA	AA	BB	BB	AA	AA	AA	BB	AA	AA	BB	BB	AA	AA	AA	BB	AA	AA	AA	BB	AA	BB	AA	AA	AB	AA	AA	BB	BB	AA	AA	AA	AA	AA	BB	AA	AA	AA	AA	AA	AA	BB
5_253685267	AA	AA	AA	AA	AA	AA	BB	AA	AA	BB	BB	AA	AA	AA	BB	AA	AA	BB	BB	AA	AA	AA	BB	AA	AA	AA	BB	AA	BB	AA	AA	AB	AA	AA	BB	BB	AA	AA	AA	AA	AA	BB	AA	AA	AA	AA	AA	AA	BB
5_254213436	AA	AA	AA	AA	AA	AA	BB	AA	AA	BB	BB	AA	AA	AA	BB	AA	AA	BB	BB	AA	AA	AA	BB	AA	AA	AA	BB	AA	BB	AA	AA	AB	AA	AA	BB	BB	AA	AA	AA	AA	AA	BB	AA	AA	AA	AA	AA	AA	BB
5_254724905	AA	AA	-	AA	AA	AA	BB	AA	AA	BB	BB	AA	AA	AA	BB	AA	AA	BB	BB	AA	AA	AA	BB	AA	AA	AA	BB	AA	BB	AA	AA	AB	AA	AA	BB	BB	AA	AA	AA	AA	AA	BB	AA	AA	AA	AA	AA	AA	BB
5_254925907	AA	AA	AA	AA	AA	AA	BB	AA	AA	BB	BB	AA	AA	AA	BB	AA	AA	BB	BB	AA	AA	AA	BB	AA	AA	AA	BB	AA	BB	AA	AA	AB	AA	AA	BB	BB	AA	AA	AA	AA	AA	BB	AA	AA	AA	AA	AA	AA	BB
5_274592845	AB	AA	BB	AA	BB	AA	BB	AA	AA	BB	BB	AA	AA	AA	BB	AA	AB	AA	BB	AA	AA	AA	AA	AA	AA	AA	BB	BB	BB	AA	AA	BB	BB	AB	BB	BB	AA	AA	BB	BB	AA	AA	AB	AA	AA	AA	AA	BB	BB
5_275338819	AA	AA	AA	AA	BB	AA	BB	AA	AA	BB	BB	AA	AA	AA	BB	AA	AB	AA	BB	AA	AA	AA	AA	AA	AA	AA	BB	BB	BB	AA	AA	BB	BB	AB	BB	BB	AA	AA	BB	BB	AA	AA	AB	AA	AA	AA	AA	BB	BB
5_280101715	AA	AA	AA	AA	BB	AA	BB	AA	AA	BB	AA	AA	AA	AA	BB	AA	BB	AA	BB	AA	AA	AA	AA	AA	AA	AA	BB	BB	BB	AA	AA	BB	BB	AB	-	BB	AA	AA	BB	BB	AA	AA	AB	-	AA	AA	AA	BB	BB
5_280129308	AA	AA	AA	AA	BB	AA	BB	AA	AA	BB	AA	AA	AA	AA	BB	AA	AB	AA	BB	AA	AA	AA	AA	AA	AA	AA	BB	BB	BB	AA	AA	BB	BB	AB	AA	BB	AA	AA	BB	BB	AA	AA	AB	AA	AA	AA	AA	BB	BB
5_280129371	AA	AA	AA	AA	BB	AA	BB	AA	AA	BB	AA	AA	AA	AA	BB	AA	AB	AA	BB	AA	AA	AA	AA	AA	AA	AA	BB	BB	BB	AA	AA	BB	BB	AB	AA	BB	AA	AA	BB	BB	AA	AA	AB	AA	AA	AA	AA	BB	BB
5_280129396	AA	AA	AA	AA	BB	AA	BB	AA	AA	BB	AA	AA	AA	AA	BB	AA	AB	AA	BB	AA	AA	AA	AA	AA	AA	AA	BB	BB	BB	AA	AA	BB	BB	AB	AA	BB	AA	AA	BB	BB	AA	AA	AB	AA	AA	AA	AA	BB	BB
5_280454844	AA	AA	AA	AA	BB	AA	BB	AA	AA	BB	AA	AA	AA	AA	BB	AA	BB	AA	BB	AA	AA	AA	AA	AA	AA	AA	BB	BB	BB	AA	AA	BB	BB	AB	AA	BB	AA	AA	BB	BB	AA	AA	AB	AA	AA	AA	AA	BB	BB
5_282600958	AA	AA	AA	AA	BB	AA	BB	AA	AA	BB	AA	AA	AA	AA	BB	AA	BB	AA	BB	AA	AA	AA	AA	AA	AA	AA	BB	BB	BB	AA	AA	BB	BB	AB	AA	BB	AA	AA	BB	BB	AA	AA	AB	AA	AA	AA	AA	BB	BB
5_283313529	AA	AA	AA	AA	BB	AA	BB	AA	AA	BB	AA	AA	AA	AA	BB	AA	BB	AA	BB	AA	AA	AA	AA	AA	AA	AA	BB	BB	BB	AA	AA	BB	BB	AB	AA	BB	AA	AA	BB	BB	AA	AA	AB	AA	AA	AA	AA	BB	BB
5_285130887	AA	AA	AA	AA	BB	AA	BB	AA	AA	BB	AA	AA	AA	AA	BB	AA	BB	AA	BB	AA	AA	AA	AA	AA	AA	AA	BB	BB	BB	AA	AA	BB	AB	AB	AA	BB	AA	AA	BB	BB	AA	AA	AB	AA	AA	AA	AA	BB	BB
5_287001699	AA	AA	AA	AA	BB	AA	BB	AA	AA	BB	AA	AA	AA	AA	BB	AA	BB	AA	BB	AA	AA	AA	AA	AA	AA	AA	BB	BB	BB	AA	AA	BB	BB	AB	AA	BB	AA	AA	BB	BB	AA	AA	AB	AA	AA	AA	AA	BB	BB
5_287002972	AA	AA	AA	AA	BB	AA	BB	AA	AA	BB	AA	AA	AA	AA	BB	AA	AB	AA	BB	AA	AA	AA	AA	AA	AA	AA	BB	BB	BB	AA	AA	BB	AB	AB	AA	BB	AA	AA	BB	BB	AA	AA	AB	AA	AA	AB	AA	BB	BB
5_296864585	AA	AA	AA	AA	BB	AA	BB	AB	AA	BB	AB	BB	BB	AB	BB	BB	BB	BB	AA	AA	AA	AA	AA	AA	AA	AA	BB	BB	BB	AA	AA	BB	BB	BB	AA	BB	AA	BB	BB	BB	AA	AA	AA	AA	AA	AB	AA	BB	BB
5_298002214	AA	AA	AA	AA	BB	AA	BB	AB	AA	BB	AB	BB	BB	AB	BB	BB	BB	BB	AA	AA	AA	AA	AA	AA	AA	AA	BB	BB	BB	AA	AA	BB	BB	BB	AA	BB	AA	BB	BB	BB	AA	AA	AA	AA	AA	AA	AA	BB	BB
5_298002244	AA	AA	AA	AA	BB	AA	BB	AB	AA	BB	AB	BB	BB	AB	BB	BB	BB	BB	AA	AA	AA	AA	AA	AA	AA	AA	BB	BB	BB	AA	AA	BB	BB	BB	AA	BB	AA	BB	BB	BB	AA	AA	AA	AA	AA	AA	AA	BB	BB
5_306038370	AA	AA	AA	AA	BB	AA	BB	BB	AA	BB	-	BB	AB	BB	BB	BB	BB	BB	AA	AA	AA	AB	AA	BB	AA	AA	BB	BB	BB	AA	AA	BB	BB	AA	AA	BB	AA	BB	BB	BB	BB	AA	AA	AA	AA	AA	AA	BB	-
5_307530523	AA	AA	AA	AA	BB	AA	BB	BB	AA	BB	AB	BB	AB	BB	BB	BB	BB	BB	AA	AA	AA	AB	AA	BB	AA	AA	BB	BB	BB	AA	AA	BB	BB	AA	AA	BB	AA	BB	BB	BB	BB	AA	AA	AA	AA	AA	AA	BB	BB
5_320142094	AA	AA	AA	AA	BB	AA	BB	BB	AA	BB	AB	BB	BB	BB	BB	BB	AA	AA	AA	AA	AA	AB	AA	BB	AB	AA	BB	BB	BB	AA	BB	BB	BB	AA	AA	BB	BB	BB	AA	BB	BB	AA	AA	AA	AA	AA	BB	BB	BB
5_321806040	AA	AA	AA	AA	BB	AA	BB	BB	AA	BB	BB	BB	AA	BB	BB	BB	AA	AA	AA	AA	AA	AB	AA	BB	BB	AA	BB	BB	BB	AA	BB	BB	BB	AA	BB	AA	BB	BB	AA	BB	BB	AA	AA	AA	AA	AA	BB	AA	BB
5_323183440	AA	AA	AA	AA	BB	AA	BB	BB	BB	BB	AB	BB	AA	BB	BB	BB	AA	AB	AA	AA	AA	AB	AA	BB	BB	AA	BB	BB	BB	AA	BB	BB	BB	AA	BB	AA	BB	BB	AA	BB	BB	AA	AA	AA	AA	AA	BB	-	BB
5_323183536	AA	AA	AA	AA	BB	AA	BB	BB	BB	BB	AB	BB	AA	BB	BB	BB	AA	AA	AA	AA	AA	AB	AA	BB	BB	AA	BB	BB	BB	AA	BB	BB	BB	AA	BB	AA	BB	BB	AA	BB	BB	AA	AA	AA	AA	AA	BB	AA	BB
5_325519015	AA	AA	AA	AA	BB	AA	BB	BB	BB	BB	AB	BB	AA	BB	BB	BB	AA	AA	AA	AA	AA	AB	BB	BB	BB	AA	BB	BB	BB	AA	BB	BB	BB	AA	BB	AA	BB	BB	AA	BB	BB	AA	AA	AA	AA	AA	BB	AA	BB
5_325699011	AA	AA	AA	AA	BB	AA	BB	BB	BB	BB	AB	BB	AA	BB	BB	BB	AA	AA	AA	AA	AA	AB	BB	BB	BB	AA	BB	BB	BB	AA	BB	BB	BB	AA	BB	AA	BB	BB	AA	BB	BB	AA	AA	AA	AA	AA	BB	AA	BB
5_326131475	AA	AA	AA	AA	BB	AA	BB	BB	BB	BB	AB	BB	AA	BB	BB	BB	AA	AA	AA	AA	AA	AB	BB	BB	BB	AA	BB	BB	BB	AA	BB	BB	BB	AA	BB	AA	BB	BB	AA	BB	BB	AA	AA	AA	AA	AA	BB	AA	BB
5_332439104	AA	AA	AA	AA	BB	AA	BB	BB	BB	BB	AA	BB	AA	BB	BB	BB	AA	AA	AA	AA	AA	AB	AA	BB	BB	AA	BB	BB	AA	AA	BB	BB	BB	AA	BB	AA	BB	BB	BB	BB	BB	AB	AA	AA	AA	AA	AB	AA	BB
5_333009330	AA	AA	AA	AA	BB	AA	BB	BB	BB	BB	AA	BB	AA	BB	BB	BB	AA	AA	AA	AA	AA	AB	AA	BB	BB	AA	BB	BB	AA	AA	BB	BB	BB	AA	BB	AA	BB	BB	BB	BB	BB	AB	AA	AA	AA	AA	BB	AA	BB
5_333088122	AA	AA	AA	AA	BB	AA	BB	BB	BB	BB	AA	BB	AA	BB	BB	BB	AA	AA	AA	AA	AA	AB	AA	BB	BB	AA	BB	BB	AA	AA	BB	BB	-	AA	BB	AA	BB	BB	BB	BB	BB	AB	AA	AA	AA	AA	BB	AA	BB
5_333088317	AA	AA	AA	AA	BB	AA	BB	BB	BB	BB	AA	BB	AA	BB	BB	BB	AA	AA	AA	AA	AA	AB	AA	BB	BB	AA	BB	AB	AA	AA	BB	BB	BB	AA	BB	AA	BB	BB	BB	BB	BB	AB	AA	AA	AA	AA	BB	AA	BB
5_334739436	AA	AA	AA	AA	BB	AA	BB	BB	BB	BB	AA	BB	AA	BB	BB	BB	AA	AA	AA	AA	AA	AB	AA	BB	BB	AA	BB	BB	AA	AA	BB	AA	BB	AA	BB	AA	BB	BB	AA	BB	BB	AB	AA	AA	AA	AA	BB	AA	BB
5_334937016	AA	AA	AA	AA	BB	AA	BB	BB	BB	BB	AA	BB	AA	BB	BB	BB	AA	AA	AA	AA	AA	AB	AA	BB	BB	AA	BB	BB	AA	AA	BB	AA	BB	AA	BB	AA	BB	BB	AA	BB	BB	AB	AA	AA	AA	AA	BB	AA	BB
5_336130937	AA	AA	AA	AA	BB	AA	BB	BB	BB	BB	AA	BB	AA	AA	BB	BB	AA	AA	AA	AA	AA	AB	AA	BB	BB	AA	BB	BB	AA	AA	BB	AA	AA	AA	BB	AA	BB	BB	AA	BB	BB	AB	AA	AA	AA	AA	BB	AA	BB
5_336455420	AA	AA	-	AA	BB	AA	BB	BB	BB	BB	AA	BB	AA	AA	BB	BB	AA	AA	AA	AA	AA	AB	AA	BB	BB	AA	BB	BB	AA	AA	BB	AA	AA	AA	BB	AA	BB	BB	AA	BB	BB	AB	AA	AA	AA	AA	BB	AA	BB
5_336588499	AA	AA	-	AA	BB	AA	BB	BB	BB	BB	AA	BB	AA	AA	BB	BB	AA	AA	AA	AA	AA	AB	AA	BB	BB	AA	BB	BB	AA	AA	BB	AA	AA	AA	BB	AA	BB	BB	AA	BB	BB	AB	BB	AA	-	AA	BB	AA	BB
5_337176634	AA	AA	AA	AA	BB	AA	BB	BB	BB	BB	AA	BB	AA	AA	BB	BB	AA	AA	AA	AA	AA	AB	AA	BB	BB	AA	BB	BB	AA	AA	BB	AA	AA	AA	BB	AA	BB	BB	AA	BB	BB	AB	BB	AA	AA	AA	BB	AA	BB
5_337178093	AA	AA	AA	AA	BB	AA	BB	BB	BB	BB	AA	BB	AA	AA	BB	BB	AA	AA	AA	AA	AA	AB	AA	BB	BB	AA	BB	BB	AA	AA	BB	AA	AA	AA	BB	AA	BB	BB	AA	BB	BB	AB	BB	AA	AA	AA	BB	AA	BB
5_337273686	AA	AA	AA	AA	BB	AA	BB	BB	BB	BB	AA	BB	AA	AA	BB	BB	AA	AA	AA	AA	AA	AB	AA	BB	BB	AA	BB	BB	AA	AA	BB	AA	AA	AA	BB	AA	BB	BB	AA	BB	BB	AB	BB	AA	AA	AA	BB	AA	AA
6_13966436	AA	AA	AA	BB	BB	AB	AA	BB	AA	BB	BB	AA	AA	AA	AA	AA	BB	AA	AA	BB	AA	BB	AA	BB	AA	BB	BB	AA	AA	AA	BB	AB	AB	BB	AA	BB	BB	AA	AA	BB	BB	AA	AA	AA	AA	BB	AA	AA	BB
6_32255712	AA	AB	AA	BB	BB	BB	BB	BB	AA	BB	AA	AA	AA	BB	AA	AA	BB	AA	AA	BB	AA	AA	BB	AA	BB	BB	BB	AA	AA	AB	BB	AA	AA	BB	AA	BB	AA	AA	BB	BB	BB	BB	AA	-	AA	BB	AA	AA	BB
6_36503185	BB	AB	BB	BB	BB	BB	BB	BB	AA	BB	AA	AA	AA	BB	AA	AA	BB	AA	AA	BB	AA	AA	BB	AA	BB	BB	BB	AA	AA	AB	BB	AA	AA	BB	AA	BB	AA	AA	BB	BB	BB	BB	AA	BB	AA	BB	AA	AA	BB
6_36573361	BB	AB	BB	BB	BB	BB	BB	BB	AA	BB	AA	AA	AA	BB	AA	AA	BB	AA	AA	BB	AA	AA	BB	AA	BB	BB	BB	AA	AA	AB	AA	AA	AA	BB	AA	BB	AA	AA	BB	BB	BB	BB	AA	BB	AA	BB	AA	AA	BB
6_38711472	BB	AB	BB	BB	BB	BB	BB	BB	AA	BB	AA	AA	AA	BB	AA	AA	BB	AA	AA	BB	AA	AA	BB	AA	BB	BB	BB	AA	AA	AB	AA	AA	AA	BB	AA	BB	AA	AB	BB	BB	BB	BB	AA	BB	AA	BB	AA	AA	BB
6_38784691	BB	AB	BB	BB	BB	BB	BB	BB	AA	BB	AA	AA	AA	BB	AA	AA	BB	AA	AA	BB	AA	AA	BB	AA	BB	BB	BB	AA	AA	AB	AA	AA	AA	BB	AA	BB	AA	AB	BB	BB	BB	BB	AA	BB	AA	BB	AA	AA	BB
6_38849973	BB	AB	BB	BB	BB	BB	BB	BB	AA	BB	AA	AA	AA	BB	AA	AA	BB	AA	AA	BB	AA	AA	BB	AA	BB	BB	BB	AA	AA	AB	AA	AA	AA	BB	AA	BB	AA	AB	BB	BB	BB	BB	AA	BB	AA	BB	AA	AA	BB
6_38851675	BB	AB	BB	BB	BB	BB	BB	BB	AA	BB	AA	AA	AA	BB	AA	AA	BB	AA	AA	BB	AA	AA	BB	AA	BB	BB	BB	AA	AA	AB	AA	AA	AA	BB	AA	BB	AA	AB	BB	BB	BB	BB	AA	BB	AA	BB	AA	AA	BB
6_38851688	BB	AB	BB	BB	BB	BB	BB	BB	AA	BB	AA	AA	AA	BB	AA	AA	BB	AA	AA	BB	AA	AA	BB	AA	BB	BB	BB	AA	AA	AB	AA	AA	AA	BB	AA	BB	AA	AB	BB	BB	BB	BB	AA	BB	AA	BB	AA	AA	BB
6_38851730	BB	AB	BB	BB	BB	BB	BB	BB	AA	BB	AA	AA	AA	BB	AA	AA	BB	AA	AA	BB	AA	AA	BB	AA	BB	BB	BB	AA	AA	AB	AA	AA	AA	BB	AA	BB	AA	AB	BB	BB	BB	BB	AA	BB	AA	BB	AA	AA	BB
6_40690545	BB	AB	BB	BB	BB	BB	BB	BB	AA	BB	AA	AA	AA	BB	AA	AA	BB	AA	AA	BB	AA	AA	BB	AA	BB	BB	BB	AA	AA	AB	AA	AA	AA	BB	AA	BB	AA	AB	BB	BB	BB	BB	AA	BB	AA	BB	AA	AA	BB
6_40690554	BB	AB	BB	BB	BB	BB	BB	BB	AA	BB	AA	AA	AA	BB	AA	AA	BB	AA	AA	BB	AA	AA	BB	AA	BB	BB	BB	AA	AA	AB	AA	AA	AA	BB	AA	BB	AA	AB	BB	BB	BB	BB	AA	BB	AA	BB	AA	AA	BB
6_41503024	BB	AB	-	BB	BB	BB	BB	BB	AA	BB	AA	AA	AA	BB	AA	AA	BB	AA	AA	BB	AA	AA	BB	-	BB	BB	BB	AA	AA	AB	AA	AA	AA	BB	AA	BB	AA	BB	BB	BB	BB	BB	AA	BB	AA	BB	AA	AA	-
6_42790497	BB	AB	BB	BB	BB	BB	BB	BB	AA	BB	AA	AA	AA	BB	AA	AA	BB	AA	AA	BB	AA	AB	BB	AA	BB	BB	BB	AA	AA	AB	AA	AA	AA	BB	AA	BB	AA	BB	BB	BB	BB	BB	AA	BB	AA	BB	AA	AA	BB
6_43711004	BB	AB	BB	BB	BB	BB	BB	BB	AA	BB	AA	AA	AA	BB	AA	AA	BB	AA	AA	BB	AA	AB	BB	AA	BB	BB	BB	AA	AA	AB	AA	AA	AA	BB	AA	BB	AA	BB	BB	AB	BB	BB	AA	BB	AA	BB	AA	AA	-
6_51187173	AB	BB	BB	BB	BB	BB	BB	BB	AA	BB	AA	AA	AA	BB	AA	AA	BB	AA	AA	BB	AA	AB	BB	AB	BB	BB	BB	AA	AA	AB	BB	AA	AA	BB	AA	BB	AA	BB	AA	AA	BB	BB	AA	BB	AA	BB	AA	AA	BB
6_60632423	AB	AA	AB	BB	BB	BB	BB	BB	AA	BB	AA	AA	AB	BB	AA	AA	BB	AA	AA	BB	AA	AB	BB	BB	BB	BB	BB	AA	AA	AA	BB	AA	AA	BB	AA	BB	AA	BB	AA	AA	BB	AA	AA	BB	AA	BB	AA	AA	AB
6_60926094	AB	AA	AB	BB	BB	BB	BB	BB	AA	BB	AA	AA	AB	BB	AA	AA	BB	AA	AA	BB	AA	AB	BB	BB	BB	BB	BB	AA	AA	AA	BB	AA	AA	BB	AA	BB	AA	BB	AA	AA	BB	AA	AA	BB	AA	BB	AA	AA	AB
6_60978016	AB	AA	AB	BB	BB	BB	BB	BB	AA	BB	AA	AA	AB	BB	AA	AA	BB	AA	AA	BB	AA	AB	BB	BB	BB	BB	BB	AA	AA	AA	BB	AA	AA	BB	AA	BB	AA	BB	AA	AA	BB	AA	AA	BB	AA	BB	AA	AA	AB
6_60978115	AB	AA	AA	BB	BB	BB	BB	BB	AA	BB	AA	AA	AB	BB	AA	AA	BB	AA	AA	BB	AA	AB	BB	BB	BB	BB	BB	AA	AA	AA	BB	AA	AA	BB	AA	BB	AA	BB	AA	AA	BB	AA	AA	BB	AA	BB	AA	AA	AB
6_63967213	AB	AA	AB	BB	BB	BB	BB	BB	AA	BB	AA	AA	AB	BB	AA	AA	BB	AA	AA	BB	AA	AB	BB	BB	BB	BB	BB	AA	AA	AA	BB	AA	AA	BB	AA	BB	AA	BB	AA	AA	BB	AA	AA	BB	AA	BB	AA	AA	AB
6_66023418	AA	AA	AB	BB	BB	BB	BB	BB	AA	BB	AA	AA	AB	BB	AA	AA	BB	AA	AA	BB	AA	AA	BB	BB	BB	BB	BB	AA	AA	AA	BB	AA	AA	BB	AA	BB	AA	BB	AA	AA	BB	AA	AA	BB	AA	BB	AA	AA	AB
6_75050525	BB	AA	BB	BB	BB	BB	BB	BB	AA	BB	AA	AA	AA	BB	AA	AA	BB	AA	BB	BB	AA	AA	BB	BB	BB	BB	BB	AA	AA	AA	BB	AA	AA	BB	AA	BB	AA	BB	AA	AA	AA	AA	AA	AA	AA	BB	AA	AA	BB
6_75186358	BB	AA	BB	BB	BB	BB	BB	BB	AA	BB	AA	AA	AA	BB	AA	AA	BB	AA	BB	BB	AA	AA	BB	BB	BB	BB	BB	AA	AA	AA	BB	AA	AA	BB	AA	BB	AA	BB	AA	AA	AA	AA	AA	AA	AA	BB	AA	AA	AB
6_75791503	BB	AA	BB	BB	BB	BB	BB	BB	AA	BB	AA	AA	AA	BB	AA	AA	BB	AA	BB	BB	AA	AA	BB	BB	BB	BB	BB	AA	AA	AA	BB	BB	AA	BB	AA	BB	AA	BB	AA	AA	AA	AA	AA	AA	AA	BB	AA	AA	AA
6_76328955	BB	AA	BB	BB	BB	BB	BB	BB	AA	BB	AA	AA	AA	BB	AA	AA	BB	AA	BB	BB	AA	AA	BB	BB	BB	BB	BB	AA	AA	AA	BB	BB	AA	BB	AA	BB	AA	BB	AA	AA	AA	AA	AA	-	AA	BB	AA	AA	BB
6_81284119	BB	AA	BB	BB	AA	BB	BB	AA	AA	BB	BB	AA	AA	BB	AA	AA	BB	AA	BB	BB	AA	AA	BB	BB	BB	BB	BB	AA	AA	AA	BB	BB	AA	BB	AA	BB	AA	BB	AA	AA	AA	AA	AA	AA	AA	BB	AA	AA	BB
6_83075681	BB	AA	BB	BB	AA	BB	BB	AA	AA	BB	BB	AA	AA	BB	AA	AA	BB	AA	BB	BB	AA	AA	BB	BB	BB	BB	BB	AA	AA	AA	AA	BB	AA	BB	AA	BB	AA	BB	AA	AA	AA	AA	AA	AA	AA	BB	AA	AA	BB
6_83075717	BB	AA	BB	BB	AA	BB	BB	AA	AA	BB	BB	AA	AA	BB	AA	AA	BB	AA	BB	BB	AA	AA	BB	BB	BB	BB	BB	AA	AA	AA	AA	BB	AA	BB	AA	BB	AA	BB	AA	AA	AA	AA	AA	AA	AA	BB	AA	AA	BB
6_83075730	BB	AA	BB	BB	AA	BB	BB	AA	AA	BB	BB	AA	AA	BB	AA	AA	BB	AA	BB	BB	AA	AA	BB	BB	BB	BB	BB	AA	AA	AA	AA	BB	AA	BB	AA	BB	AA	BB	AA	AA	AA	AA	AA	AA	AA	BB	AA	AA	BB
6_83075745	BB	AA	BB	BB	AA	BB	BB	AA	AA	BB	BB	AA	AA	BB	AA	AA	BB	AA	BB	BB	AA	AA	BB	BB	BB	BB	BB	AA	AA	AA	AA	BB	AA	BB	AA	BB	AA	BB	AA	AA	AA	AA	AA	AA	AA	BB	AA	AA	BB
6_86090669	BB	AA	BB	BB	AA	BB	BB	AA	AA	BB	BB	AA	AA	BB	AA	AA	BB	AA	BB	BB	AA	AA	BB	BB	BB	BB	BB	AA	AA	AA	AA	BB	AA	BB	AA	BB	AA	BB	AA	AA	AA	AA	AA	AA	AA	BB	AA	AA	BB
6_98861341	BB	AA	BB	BB	AA	BB	BB	BB	AA	AA	BB	AA	AA	BB	AA	AA	BB	AA	BB	BB	AA	AA	BB	BB	BB	AA	BB	AA	AA	AA	AA	BB	AA	BB	AA	BB	AA	BB	AA	AA	AA	AA	AA	AA	AA	BB	AA	BB	BB
6_121860153	BB	AA	BB	BB	AA	BB	BB	BB	AA	AA	BB	AA	AA	BB	AA	AA	BB	AA	BB	BB	AA	AA	BB	BB	BB	AA	BB	AA	AA	AA	AA	BB	AB	BB	AA	BB	AA	AA	AA	AA	AA	AA	AA	AA	AA	BB	AA	BB	AA
6_122005663	BB	AA	BB	BB	AA	BB	BB	BB	AA	AA	BB	AA	AA	BB	AA	AA	BB	AA	BB	BB	AA	AA	BB	BB	BB	AA	BB	AA	AA	AA	AA	BB	AB	BB	AA	BB	AA	AA	AA	AA	AA	AA	AA	AA	AA	BB	AA	BB	AA
6_129034112	BB	AA	BB	AA	AA	BB	BB	BB	AA	AA	BB	AA	AA	BB	AA	AA	BB	AA	BB	BB	AA	AA	BB	BB	BB	AA	BB	AA	AA	AA	AA	BB	BB	BB	AA	BB	AA	AA	AA	AA	AA	AA	AA	AA	AA	BB	AA	BB	AA
6_129344393	BB	AA	BB	-	AA	BB	BB	BB	AA	AA	BB	AA	AA	BB	AA	AA	BB	AA	BB	BB	AA	AA	BB	BB	BB	AA	BB	AA	AA	AA	AB	BB	BB	BB	AA	BB	AA	AA	AA	AA	AA	AA	AA	AA	AA	BB	AA	BB	AA
6_134182398	BB	AA	BB	AA	AA	BB	BB	AA	AA	BB	AB	AA	AA	BB	AA	AA	BB	AA	BB	BB	AA	AA	BB	BB	BB	AA	BB	AA	AA	AA	AB	BB	BB	BB	AA	BB	AA	AA	AA	AA	AA	AA	AA	AA	AA	AA	AA	-	AA
6_134182441	BB	AA	BB	AA	AA	BB	BB	AA	AA	BB	AB	AA	AA	BB	AA	AA	BB	AA	BB	BB	AA	AA	BB	BB	BB	AA	BB	AA	AA	AA	AB	BB	BB	BB	AA	BB	AA	AA	AA	AA	AA	AA	AA	AA	AA	AA	AA	-	AA
6_135685480	BB	AA	BB	AA	AA	BB	BB	AA	AA	BB	AB	AA	AA	BB	AA	AA	BB	AA	BB	BB	AA	AA	BB	BB	BB	AA	BB	AA	AA	AA	AB	BB	BB	BB	AA	BB	AA	AA	AA	AA	AA	AA	AA	AA	AA	AA	AA	BB	AA
6_136676211	BB	AA	BB	AA	AA	BB	BB	-	AA	BB	AB	AA	AA	BB	AA	AA	BB	AA	BB	BB	AA	AA	BB	BB	BB	AA	BB	AA	AA	AA	AB	BB	BB	BB	AA	BB	AA	AA	AA	AA	AA	AA	AA	AA	AA	AA	AA	BB	-
6_136676232	BB	AA	BB	AA	AA	BB	BB	-	AA	BB	AB	AA	AA	BB	AA	AA	BB	AA	BB	BB	AA	AA	BB	BB	BB	AA	BB	AA	AA	AA	AB	BB	BB	BB	AA	BB	AA	AA	AA	AA	AA	AA	AA	AA	AA	AA	AA	BB	-
6_136726244	BB	AA	BB	AA	AA	BB	BB	AA	AA	BB	AB	AA	AA	BB	AA	AA	BB	AA	BB	BB	AA	AA	BB	BB	BB	AA	BB	AA	AA	AA	AB	BB	BB	BB	AA	BB	AA	AA	AA	AA	AA	AA	AA	AA	-	AA	AA	BB	AA
6_137272668	BB	AA	BB	AA	AA	BB	BB	AA	AA	BB	AB	AA	AA	BB	AA	AA	BB	AA	BB	BB	AA	AA	BB	BB	BB	AA	BB	AA	AA	AA	AB	BB	BB	BB	AA	AA	AA	AA	AA	AA	AA	AA	AA	AA	AA	AA	AA	BB	AA
6_145907274	BB	AA	BB	AA	AA	AA	BB	AA	BB	BB	AA	AA	AA	BB	AA	AA	BB	AA	BB	BB	AA	AA	AA	BB	BB	AA	BB	AA	AA	AA	BB	BB	BB	BB	AA	BB	AA	AA	AA	AA	AA	AA	AA	AA	AA	AA	BB	AA	AA
6_145974259	BB	AA	BB	AA	AA	AA	BB	AA	BB	BB	AA	AA	AA	BB	AA	AA	BB	AA	BB	BB	AA	AA	AA	-	BB	AA	BB	AA	AA	AA	BB	BB	BB	BB	AA	BB	AA	AA	AA	AA	AA	AA	AA	-	AA	AA	BB	AA	AA
6_145974265	BB	AA	BB	AA	AA	AA	BB	AA	BB	BB	AA	AA	AA	BB	AA	AA	BB	AA	BB	BB	AA	AA	AA	-	BB	AA	BB	AA	AA	AA	BB	BB	BB	BB	AA	BB	AA	AA	AA	AA	AA	AA	AA	-	AA	AA	BB	AA	AA
6_146003713	BB	AA	BB	AA	AA	AA	BB	AA	BB	BB	AA	AA	AA	BB	AA	AA	BB	AA	BB	BB	AA	AA	AA	BB	BB	AA	BB	AA	AA	AA	BB	BB	BB	BB	AA	BB	AA	AA	AA	AA	AA	AA	AA	AA	AA	AA	BB	AA	AA
6_152491250	BB	AA	BB	-	AA	AA	BB	AA	AA	BB	AA	AA	AA	BB	AA	AA	BB	AB	BB	BB	AA	AA	AA	BB	BB	AB	BB	AA	BB	AA	BB	BB	BB	BB	AA	BB	AA	AA	AA	AA	AA	AA	AA	AA	AA	AA	BB	AA	AA
6_152556994	BB	AA	BB	AA	AA	AA	BB	AA	AB	BB	AA	AA	AA	BB	AA	AA	BB	AB	BB	BB	AA	AA	AA	BB	BB	AB	BB	AA	BB	AA	BB	BB	BB	BB	AA	BB	AA	AA	AA	AA	AA	AA	AA	AA	AA	AA	BB	AA	AA
6_152861359	BB	AA	BB	AA	AA	AA	BB	AA	AB	BB	AA	AA	AA	BB	AA	AA	BB	AB	BB	BB	AA	AA	AA	BB	BB	AB	BB	AA	BB	AA	BB	BB	BB	BB	AA	BB	AA	AA	AA	AA	AA	AA	AA	AA	AA	AA	BB	AA	AA
6_152861386	BB	AA	BB	AA	AA	AA	BB	AA	AB	BB	AA	AA	AA	BB	AA	AA	BB	AB	BB	BB	AA	AA	AA	BB	BB	AB	BB	AA	BB	AA	BB	BB	BB	BB	AA	BB	AA	AA	AA	AA	AA	AA	AA	AA	AA	AA	BB	AA	AA
6_152861425	BB	AA	BB	AA	AA	AA	BB	AA	AB	BB	AA	AA	AA	BB	AA	AA	BB	AB	BB	BB	AA	AA	AA	BB	BB	AB	BB	AA	BB	AA	BB	BB	BB	BB	AA	BB	AA	AA	AA	AA	AA	AA	AA	AA	AA	AA	BB	AA	AA
6_152861446	BB	AA	BB	AA	AA	AA	BB	AA	AB	BB	AA	AA	AA	BB	AA	AA	BB	AB	BB	BB	AA	AA	AA	BB	BB	AB	BB	AA	BB	AA	BB	BB	BB	BB	AA	BB	AA	AA	AA	AA	AA	AA	AA	AA	AA	AA	BB	AA	AA
6_153537045	BB	AA	BB	AA	AA	AA	BB	AA	AB	BB	AA	AA	AA	BB	AA	AA	BB	AA	BB	BB	AA	AA	AA	-	BB	AA	BB	AA	BB	AA	BB	BB	BB	BB	AA	BB	AA	AA	AA	AA	AA	AA	AA	AA	AA	AA	BB	AA	AA
6_153967615	BB	AA	BB	AA	AB	AA	BB	AA	BB	BB	AA	AA	AA	BB	AA	AA	BB	AA	BB	BB	AA	AA	AA	BB	BB	AB	BB	AA	BB	AA	BB	BB	BB	BB	AA	BB	AA	-	AA	AA	AA	AA	AA	AA	AA	AA	BB	AA	AA
6_153967655	BB	AA	BB	AA	AA	AA	BB	AA	AB	BB	AA	AA	AA	BB	AA	AA	BB	AA	BB	BB	AA	AA	AA	BB	BB	AB	BB	AA	BB	AA	BB	BB	BB	BB	AA	BB	AA	-	AA	AA	AA	AA	AA	AA	AA	AA	BB	AA	AA
6_153967682	BB	AA	BB	AA	AA	AA	BB	AA	AB	BB	AA	AA	AA	BB	AA	AA	BB	AA	BB	BB	AA	AA	AA	BB	BB	AB	BB	AA	BB	AA	BB	BB	BB	BB	AA	BB	AA	-	AA	AA	AA	AA	AA	AA	AA	AA	BB	AA	AA
6_153967692	BB	AA	BB	AA	AA	AA	BB	AA	AB	BB	AA	AA	AA	BB	AA	AA	BB	AA	BB	BB	AA	AA	AA	BB	BB	AB	BB	AA	BB	AA	BB	BB	BB	BB	AA	BB	AA	-	AA	AA	AA	AA	AA	AA	AA	AA	BB	AA	AA
6_157194364	BB	AA	BB	AA	AA	AA	BB	BB	AB	AA	AA	AA	AA	BB	AA	AA	BB	AB	BB	BB	AA	AA	AA	BB	BB	AB	BB	AA	AA	AA	BB	AB	BB	BB	AA	BB	AA	AA	AA	AA	AA	AA	AA	AA	AA	AA	BB	AA	AA
6_158680865	BB	AA	BB	AA	AA	AA	BB	BB	AB	AA	AA	AA	AA	AB	AA	AA	BB	AB	BB	BB	AA	AA	AA	BB	BB	AB	BB	AA	AA	AA	BB	AB	BB	BB	AA	BB	AA	AA	AA	AA	AA	AA	AA	-	AA	AA	BB	AA	AA
6_158733516	BB	AA	BB	AA	AA	AA	BB	BB	AB	AA	AA	AA	AA	AB	AA	AA	BB	AB	BB	BB	AA	AA	AA	BB	BB	AB	BB	AA	AA	AA	BB	AB	BB	BB	AA	BB	AA	AA	AA	AA	AA	AA	AA	AA	AA	AA	BB	AA	AA
6_170604488	BB	AA	BB	AA	AA	AA	AB	BB	AA	AA	AA	AA	AA	BB	AA	AA	AA	BB	BB	BB	BB	AA	AA	BB	BB	AB	BB	AA	AA	AA	AA	AB	BB	BB	AA	BB	AA	AA	AA	AA	AA	AA	AA	AA	AA	AA	AB	AA	AA
6_170604534	BB	AA	BB	AA	AA	AA	AB	BB	AA	AA	AA	AA	AA	BB	AA	AA	AA	BB	BB	BB	BB	AA	AA	BB	BB	AB	BB	AA	AA	AA	AA	AB	BB	BB	AA	BB	AA	AA	AA	AA	AA	AA	AA	AA	AA	AA	AB	AA	AA
6_180291379	BB	AA	BB	AA	AA	BB	AB	BB	AA	AA	AA	AA	AA	BB	AA	AA	AB	BB	AB	BB	BB	AA	AA	BB	BB	AB	BB	AA	AA	AA	AA	BB	BB	BB	AA	BB	BB	AA	AA	AA	AA	AA	AA	AA	AA	AA	AB	AA	AA
6_184092278	BB	AA	BB	AA	AA	BB	AB	BB	AA	AA	AA	AA	AA	BB	AA	AA	AB	BB	AB	BB	BB	AA	AA	BB	BB	AB	BB	AB	AA	AA	AA	BB	BB	BB	AA	BB	BB	AA	AA	AA	AA	AA	AA	AA	AA	AA	AB	AA	AA
6_184570550	BB	AA	BB	AA	AA	BB	AB	BB	AA	AA	AA	AA	AA	BB	AA	AA	AB	BB	AB	BB	BB	AA	AA	BB	BB	AB	BB	AB	AA	AA	AA	BB	BB	BB	AA	BB	BB	AA	AA	AA	AA	AA	AA	AA	AA	AA	AB	AA	AA
6_186159832	BB	AA	AB	AA	AA	BB	AB	BB	AA	AA	AA	AA	AA	BB	AA	AA	AA	BB	AB	BB	BB	AA	AA	BB	BB	AB	BB	AB	AA	AA	AA	BB	BB	BB	AA	BB	BB	AA	AA	AA	AA	AA	AA	AA	AA	AA	AB	AA	AA
6_186159872	BB	AA	AB	AA	AA	BB	AB	BB	AA	AA	AA	AA	AA	BB	AA	AA	AA	BB	AB	BB	BB	AA	AA	BB	BB	AB	BB	AB	AA	AA	AA	BB	BB	BB	AA	BB	BB	AA	AA	AA	AA	AA	AA	AA	AA	AA	AB	AA	AA
6_186257318	BB	AA	AB	AA	AA	BB	AB	BB	AA	AA	AA	AA	AA	BB	AA	AA	AA	BB	AA	BB	BB	AA	AA	BB	BB	AB	BB	AB	AA	AA	AA	BB	BB	BB	AA	BB	BB	AA	AA	AA	AA	AA	AA	AA	AA	AA	AB	AA	AA
6_186258183	BB	AA	AA	AA	AA	BB	AB	BB	AA	AA	AA	AA	AA	BB	AA	AA	AA	BB	AB	BB	BB	AA	AA	BB	BB	AB	BB	AB	AA	AA	AA	BB	BB	BB	AA	BB	BB	AA	AA	AA	AA	AA	AA	AA	AA	AA	AB	AA	AA
6_186348298	BB	AA	AB	AA	AA	BB	AB	BB	AA	AA	AA	AA	AA	BB	AA	AA	AA	BB	AB	BB	BB	AA	AA	BB	BB	AB	BB	AB	AA	AA	AA	BB	BB	BB	AA	BB	BB	AA	AA	AA	AA	AA	AA	AA	AA	AA	AB	AA	AA
6_186743513	BB	AA	AB	AA	AA	BB	AB	BB	AA	AA	AA	AA	AA	BB	AA	AA	AA	BB	AB	BB	BB	AA	AA	BB	BB	AB	BB	AB	AA	AA	AA	BB	BB	BB	AA	BB	BB	AA	AA	AA	AA	AA	AA	AA	AA	AA	AB	AA	AA
6_188059420	BB	AA	AB	AA	AA	BB	AB	BB	AA	AA	AA	AA	AA	BB	AA	AA	AA	BB	AB	BB	BB	AA	AA	BB	BB	AB	BB	AB	AA	AA	AA	BB	BB	BB	AA	BB	BB	AA	AA	AA	AA	AA	AA	AA	AA	AA	AB	AA	AA
6_188234021	BB	AA	BB	AA	AA	BB	AB	BB	AA	AA	AA	AA	AA	BB	AA	AA	AA	BB	AB	BB	BB	AA	AA	BB	BB	AB	BB	AB	AA	AA	AA	BB	BB	BB	AA	BB	BB	AA	AA	AA	AA	AA	AA	AA	AA	AA	AB	AA	AA
6_188234024	BB	AA	BB	AA	AA	BB	AB	BB	AA	AA	AA	AA	AA	BB	AA	AA	AA	BB	AB	BB	BB	AA	AA	BB	BB	AB	BB	AB	AA	AA	AA	BB	BB	BB	AA	BB	BB	AA	AA	AA	AA	AA	AA	AA	AA	AA	AB	AA	AA
6_188234046	BB	AA	BB	AA	AA	BB	AB	BB	AA	AA	AA	AA	AA	BB	AA	AA	AA	BB	AB	BB	BB	AA	AA	BB	BB	AB	BB	AB	AA	AA	AA	BB	BB	BB	AA	BB	BB	AA	AA	AA	AA	AA	AA	AA	AA	AA	AB	AA	AA
7_5266356	AA	BB	AA	BB	AA	AA	BB	AA	AA	AA	BB	BB	AA	AA	AA	AA	BB	AA	BB	AA	AA	AA	AA	AA	BB	AA	BB	AA	AA	AA	AA	BB	BB	AA	AA	AA	BB	BB	AA	BB	BB	AA	AA	BB	BB	AB	BB	AA	AA
7_8434350	AA	BB	AA	BB	AA	AA	BB	AA	AA	AA	BB	BB	AA	AA	AA	AA	BB	AA	BB	AA	BB	AA	AA	AA	BB	AA	BB	AA	AA	AA	AA	BB	BB	AA	AA	AA	BB	BB	AA	BB	BB	AA	AA	BB	-	AB	BB	AA	AA
7_8434405	AA	BB	AA	BB	AA	AA	BB	AA	AA	AA	BB	BB	AA	AA	AA	AA	BB	AA	BB	AA	BB	AA	AA	AA	BB	AA	BB	AA	AA	AA	AA	BB	BB	AA	AA	AA	BB	BB	AA	BB	BB	AA	AA	BB	-	AB	BB	AA	AA
7_18346020	AA	BB	AA	AA	AA	AA	BB	AA	AA	AA	BB	BB	AA	AA	AA	AA	BB	AA	BB	AA	BB	AA	BB	AA	BB	AA	BB	AA	BB	AA	AA	BB	BB	AA	AA	AA	BB	BB	AA	BB	BB	AA	AA	BB	BB	BB	BB	AA	AA
7_20906092	AA	BB	AA	AA	AA	AA	BB	AA	AA	AA	BB	BB	AA	AA	AA	AA	BB	AA	BB	AA	BB	AA	BB	AA	BB	AA	BB	AA	BB	AA	AA	BB	BB	AA	AA	AA	BB	BB	AA	BB	BB	AA	AA	BB	BB	BB	BB	AA	AA
7_23253981	AA	BB	AA	AA	AA	AA	BB	AA	AA	AA	BB	BB	AA	AA	AA	AA	BB	AA	BB	AA	BB	AA	BB	AA	BB	AA	BB	AA	BB	AA	AA	BB	BB	AA	AA	AA	BB	BB	AA	BB	BB	AA	AA	BB	BB	BB	BB	AA	AA
7_23744972	AA	BB	AA	AA	AA	AA	BB	AA	AB	AA	BB	BB	AA	AA	AA	AA	BB	AA	BB	AA	BB	AA	BB	AA	BB	AA	BB	AA	BB	AA	AA	BB	BB	AA	AA	AA	BB	BB	AA	BB	BB	AA	AA	BB	BB	BB	BB	AA	AA
7_23758136	AA	BB	AA	AA	AA	AA	BB	AA	AB	AA	BB	BB	AA	AA	AA	AA	BB	AA	BB	AA	BB	AA	BB	AA	BB	AA	BB	AA	BB	AA	AA	BB	BB	AA	AA	AA	BB	BB	AA	BB	BB	AA	AA	BB	BB	BB	BB	AA	AA
7_23758146	AA	BB	AA	AA	AA	AA	BB	AA	AB	AA	BB	BB	AA	AA	AA	AA	BB	AA	BB	AA	BB	AA	BB	AA	BB	AA	BB	AA	BB	AA	AA	BB	BB	AA	AA	AA	BB	BB	AA	BB	BB	AA	AA	BB	BB	BB	BB	AA	AA
7_23758212	AA	BB	AA	AA	AA	AA	BB	AA	AB	AA	BB	BB	AA	AA	AA	AA	BB	AA	BB	AA	BB	AA	BB	AA	BB	AA	BB	AA	BB	AA	AA	BB	BB	AA	AA	AA	BB	BB	AA	BB	BB	AA	AA	BB	BB	BB	BB	AA	AA
7_23758217	AA	BB	AA	AA	AA	AA	BB	AA	AB	AA	BB	BB	AA	AA	AA	AA	BB	AA	BB	AA	BB	AA	BB	AA	BB	AA	BB	AA	BB	AA	AA	BB	BB	AA	AA	AA	BB	BB	AA	BB	BB	AA	AA	BB	BB	BB	BB	AA	AA
7_23841744	AA	BB	AA	AA	AA	AA	BB	AA	AB	AA	BB	BB	AA	AA	AA	AA	BB	AA	BB	AA	BB	AA	BB	AA	BB	AA	BB	AA	BB	AA	AA	BB	BB	AA	AA	AA	BB	BB	AA	BB	BB	AA	AA	BB	BB	BB	BB	AA	AA
7_26656865	AA	BB	AA	AA	AA	AA	BB	AA	AA	AA	BB	BB	AA	AA	AA	AA	BB	AA	BB	AA	BB	AA	BB	AA	BB	AA	BB	AA	BB	AA	AA	BB	BB	AA	AA	AA	BB	BB	AA	BB	BB	AA	AA	BB	BB	BB	BB	AA	AA
7_27007538	AA	BB	AA	AA	AA	AA	BB	AA	AA	AA	BB	BB	AA	AA	AA	AA	BB	AA	BB	AA	BB	AA	BB	AA	BB	AA	BB	AA	BB	AA	AA	BB	BB	AA	AA	AA	BB	BB	AA	BB	AA	AA	AA	BB	BB	BB	BB	AA	AA
7_27007553	AA	BB	AA	AA	AA	AA	BB	AA	AA	AA	BB	BB	AA	AA	AA	AA	BB	AA	BB	AA	BB	AA	BB	AA	BB	AA	BB	AA	BB	AA	AA	BB	BB	AA	AA	AA	BB	BB	AA	BB	AA	AA	AA	BB	BB	BB	BB	AA	AA
7_27097700	AA	BB	AA	AA	AA	AA	BB	AA	AA	AA	BB	BB	AA	AA	AA	AA	BB	AA	BB	AA	BB	AA	BB	AA	BB	AA	BB	AA	BB	AA	AA	BB	BB	AA	AA	AA	BB	BB	AA	BB	AA	AA	AA	BB	BB	BB	BB	AA	AA
7_27271895	AA	BB	AA	AA	AA	AA	BB	AA	AA	AA	BB	BB	AA	AA	AA	AA	BB	AA	BB	AA	BB	AA	BB	AA	BB	AA	BB	AA	BB	AA	AA	BB	BB	AA	AA	AA	BB	BB	AA	BB	AA	AA	AA	BB	BB	BB	BB	AA	AA
7_27648895	AA	BB	AA	AA	AA	AA	BB	AA	AA	AA	BB	BB	AA	AA	AA	AA	BB	AA	BB	AA	BB	AA	BB	AA	BB	AA	BB	AA	BB	AA	AA	BB	BB	AA	AA	AA	BB	BB	AA	BB	AA	AA	AA	BB	BB	BB	BB	AA	AA
7_28066623	AA	BB	AA	AA	AA	AA	BB	AA	AA	AA	BB	BB	AA	AA	AA	AA	BB	AA	BB	AA	BB	AA	BB	AA	BB	AA	BB	AA	BB	AA	AA	BB	BB	AA	AA	AA	BB	BB	AA	BB	AA	AA	AA	BB	BB	BB	BB	AA	AA
7_28066867	AA	BB	AA	AA	AA	AA	BB	AA	AA	AA	BB	BB	AA	AA	AA	AA	BB	AA	BB	AA	BB	AA	BB	AA	BB	AA	BB	AA	BB	AA	AA	BB	BB	AA	AA	AA	BB	BB	AA	BB	AA	AA	AA	BB	BB	BB	BB	AA	AA
7_28783246	AA	BB	AA	AA	AA	AA	BB	AA	AA	AA	BB	BB	AA	AA	AA	AA	BB	AA	BB	AA	BB	AA	BB	AA	BB	AA	BB	AA	-	AA	AA	BB	BB	AA	AA	AA	BB	BB	AA	BB	AA	AA	AA	BB	BB	BB	BB	AA	AA
7_29788326	AA	BB	AA	AA	AA	AA	BB	AA	AA	AA	BB	BB	AA	AA	AA	AA	BB	AA	BB	AA	BB	AA	BB	AA	BB	AA	BB	AA	BB	AA	AA	BB	BB	AA	AA	AA	BB	BB	AA	BB	AA	AA	BB	BB	BB	BB	BB	AA	AA
7_29788551	AA	BB	AA	AA	AA	AA	BB	AA	AA	AA	BB	BB	AA	AA	AA	AA	BB	AA	BB	AA	BB	AA	BB	AA	BB	AA	BB	AA	BB	AA	AA	BB	BB	AA	AA	AA	BB	BB	AA	BB	AA	AA	BB	BB	BB	BB	BB	AA	AA
7_29788554	AA	BB	AA	AA	AA	AA	BB	AA	AA	AA	BB	BB	AA	AA	AA	AA	BB	AA	BB	AA	BB	AA	BB	AA	BB	AA	BB	AA	BB	AA	AA	BB	BB	AA	AA	AA	BB	BB	AA	BB	AA	AA	BB	BB	BB	BB	BB	AA	AA
7_29788800	AA	BB	AA	AA	AA	AA	BB	AA	AA	AA	BB	BB	AA	AA	AA	AA	BB	AA	BB	AA	BB	AA	BB	AA	BB	AA	BB	AA	BB	AA	AA	BB	BB	AA	AA	AA	BB	BB	AA	BB	AA	AA	BB	BB	BB	BB	BB	AA	AA
7_29802220	AA	BB	AA	AA	AA	AA	BB	AA	AA	AA	BB	BB	AA	AA	AA	AA	BB	AA	BB	AA	BB	AA	BB	AA	BB	AA	BB	AA	BB	AA	AA	BB	BB	AA	AA	AA	BB	BB	AA	BB	AA	AA	BB	BB	BB	BB	BB	AA	-
7_29861358	AA	BB	AA	AA	AA	AA	BB	AA	AA	AA	BB	BB	AA	AA	AA	AA	BB	AA	BB	AA	BB	AA	BB	AA	BB	AA	BB	AA	BB	AA	AA	BB	BB	AA	AA	AA	BB	BB	AA	BB	AA	AA	BB	BB	BB	BB	BB	AA	AA
7_29861375	AA	BB	AA	AA	AA	AA	BB	AA	AA	AA	BB	BB	AA	AA	AA	AA	BB	AA	BB	AA	BB	AA	BB	AA	BB	AA	BB	AA	BB	AA	AA	BB	BB	AA	AA	AA	BB	BB	AA	BB	AA	AA	BB	BB	BB	BB	BB	AA	AA
7_33387428	AA	BB	AA	AA	AA	AA	BB	AA	AA	AA	BB	BB	AA	AA	AA	AA	BB	AA	BB	AA	BB	AA	BB	AA	BB	AA	BB	AA	AA	AA	AA	BB	BB	AA	AA	AA	BB	BB	AA	BB	AA	AA	BB	AA	BB	BB	BB	AA	AA
7_33387488	AA	BB	AA	AA	AA	AA	BB	AA	AA	AA	BB	BB	AA	AA	AA	AA	BB	AA	BB	AA	BB	AA	BB	AA	BB	AA	BB	AA	AA	AA	AA	BB	BB	AA	AA	AA	BB	BB	AA	BB	AA	AA	BB	AA	BB	BB	BB	AA	AA
7_34127399	AA	BB	AA	AA	AA	AA	BB	AA	AA	AA	BB	BB	AA	AA	AA	AA	BB	AA	BB	AA	BB	AA	BB	AA	BB	AA	BB	AA	AA	AA	AA	BB	BB	AA	AA	AA	BB	BB	AA	BB	AA	AA	BB	AA	BB	BB	AA	AA	AA
7_34127444	AA	BB	AA	AA	AA	AA	BB	AA	AA	AA	BB	BB	AA	AA	AA	AA	BB	AA	BB	AA	BB	AA	BB	AA	BB	AA	BB	AA	AA	AA	AA	BB	BB	AA	AA	AA	BB	BB	AA	BB	AA	AA	BB	AA	BB	BB	AA	AA	AA
7_34796411	AA	BB	-	AA	AA	AA	BB	AA	AA	AA	BB	BB	AA	AA	AA	AA	BB	AA	BB	AA	BB	AA	-	AA	BB	AA	BB	AA	AA	AA	AA	BB	BB	AA	AA	AA	BB	BB	AA	BB	AA	AA	BB	AA	BB	BB	AA	AA	AA
7_35235964	AA	BB	AA	AA	AA	AA	BB	AA	AA	AA	BB	BB	AA	AA	AA	AA	BB	AA	BB	AA	BB	AA	BB	AA	BB	AA	BB	AA	AA	AA	AA	BB	BB	AA	AA	AA	BB	BB	AA	BB	AA	AA	BB	AA	BB	BB	AA	AA	AA
7_35235991	AA	BB	AA	AA	AA	AA	BB	AA	AA	AA	BB	BB	AA	AA	AA	AA	BB	AA	BB	AA	BB	AA	BB	AA	BB	AA	BB	AA	AA	AA	AA	BB	BB	AA	AA	AA	BB	BB	AA	BB	AA	AA	BB	AA	BB	BB	AA	AA	AA
7_35236048	AA	BB	AA	BB	AA	AB	BB	AB	AB	AB	BB	BB	AB	AB	AB	AB	BB	AB	BB	AB	BB	AB	BB	-	BB	AB	BB	AB	AA	AB	AB	BB	BB	AB	-	AB	BB	BB	AB	BB	AA	AB	BB	AB	BB	BB	AB	AB	AB
7_35236055	AA	BB	AA	BB	AA	AB	BB	AB	AB	AB	BB	BB	AB	AB	AB	AB	BB	AB	BB	AB	BB	AB	BB	-	BB	AB	BB	AB	AA	AB	AB	BB	BB	AB	-	AB	BB	BB	AB	BB	AA	AB	BB	AB	BB	BB	AB	AB	AB
7_35639907	AA	BB	-	AA	AA	AA	BB	AA	AA	AA	BB	BB	AA	AA	AA	AA	BB	AA	BB	AA	BB	AA	BB	AA	BB	AA	BB	AA	-	AA	AA	BB	BB	AA	AA	AA	BB	BB	AA	BB	AA	AA	BB	AA	BB	BB	AA	AA	AA
7_35639937	AA	BB	-	AA	AA	AA	BB	AA	AA	AA	BB	BB	AA	AA	AA	AA	BB	AA	BB	AA	BB	AA	BB	AA	BB	AA	BB	AA	-	AA	AA	BB	BB	AA	AA	AA	BB	BB	AA	BB	AA	AA	BB	AA	BB	BB	AA	AA	AA
7_35639952	AA	BB	-	AA	AA	AA	BB	AA	AA	AA	BB	BB	AA	AA	AA	AA	BB	AA	BB	AA	BB	AA	BB	AA	BB	AA	BB	AA	-	AA	AA	BB	BB	AA	AA	AA	BB	BB	AA	BB	AA	AA	BB	AA	BB	BB	AA	AA	AA
7_35868236	AA	BB	AA	AA	AA	AA	BB	AA	AA	AA	BB	BB	AA	AA	AA	AA	BB	AA	BB	AA	BB	AA	BB	AA	BB	AA	BB	AA	AA	AA	AA	BB	BB	AA	AA	AA	BB	BB	AA	BB	AA	AA	BB	AA	BB	BB	AA	AA	AA
7_35868546	AA	BB	AA	AA	AA	AA	BB	AA	AA	AA	BB	BB	AA	AA	AA	AA	BB	AA	BB	AA	BB	AA	BB	AA	BB	AA	BB	AA	AA	AA	AA	BB	BB	AA	AA	AA	BB	BB	AA	BB	AA	AA	BB	AA	BB	BB	AA	AA	AA
7_40431942	AA	BB	AA	AA	AA	AA	BB	AA	AA	AA	BB	BB	AA	AA	BB	AA	BB	AA	BB	AA	BB	AA	BB	AA	BB	AA	AA	AA	AA	AA	AA	BB	BB	AA	AA	AA	BB	AA	AA	BB	AA	AA	BB	AA	BB	BB	AA	AA	AA
7_43914410	AA	BB	AA	AA	AA	AA	BB	AA	AA	AA	BB	BB	AA	AA	BB	AA	AA	AA	BB	AA	BB	AA	BB	AA	BB	AA	AA	AA	BB	AA	AA	BB	BB	AA	AA	AA	AA	AA	AA	BB	AA	AA	BB	AA	BB	BB	AA	AA	-
7_43914413	AA	BB	AA	AA	AA	AA	BB	AA	AA	AA	BB	BB	AA	AA	BB	AA	AA	AA	BB	AA	BB	AA	BB	AA	BB	AA	AA	AA	BB	AA	AA	BB	BB	AA	AA	AA	AA	AA	AA	BB	AA	AA	BB	AA	BB	BB	AA	AA	-
7_45115172	AA	BB	AA	AA	AA	AA	BB	AA	AA	AA	BB	BB	AA	AA	BB	AA	AA	AA	BB	AA	BB	AA	BB	AA	BB	AA	AA	AA	BB	AA	AA	BB	BB	AA	AA	AA	AA	-	AA	BB	AA	AA	BB	AA	BB	BB	AA	AA	AA
7_46570882	AA	BB	AA	AA	AA	AA	BB	AA	AA	AA	BB	BB	AA	AA	BB	AA	AA	AA	BB	AA	BB	AA	BB	AA	BB	AA	AA	AA	BB	AA	AA	BB	BB	AA	AA	AA	AA	AA	AA	BB	AA	AA	BB	AA	BB	BB	BB	AA	AA
7_46570898	AA	BB	AA	AA	AA	AA	BB	AA	AA	AA	BB	BB	AA	AA	BB	AA	AA	AA	BB	AA	BB	AA	BB	AA	BB	AA	AA	AA	BB	AA	AA	BB	BB	AA	AA	AA	AA	AA	AA	BB	AA	AA	BB	AA	BB	BB	BB	AA	AA
7_46674455	AA	BB	AA	AA	AA	AA	BB	AA	AA	AA	BB	BB	AA	AA	BB	AA	AA	AA	BB	AA	BB	AA	BB	AA	BB	AA	AA	AA	BB	AA	AA	BB	BB	AA	AA	AA	AA	AA	AA	BB	AA	AA	BB	AA	BB	BB	BB	AA	AA
7_47976784	AA	BB	AA	AA	AA	AA	BB	AA	AA	AA	BB	BB	AA	AA	BB	AA	AA	AA	BB	AA	BB	AA	BB	AA	BB	AA	AA	AA	BB	AA	AA	BB	BB	AA	AA	AA	AA	AA	AA	BB	AA	AA	BB	AA	BB	BB	BB	AA	AA
7_57958811	AA	BB	AA	AA	AA	AA	BB	AA	AA	AA	BB	BB	BB	AA	BB	AA	AA	AA	AA	AA	AA	AA	BB	AA	BB	AA	BB	AA	BB	AA	AA	BB	BB	BB	AA	AA	AA	AA	AA	BB	AA	AA	BB	AA	BB	BB	BB	AA	AA
7_58308687	AA	BB	-	AA	AA	AA	BB	AA	AA	AA	BB	BB	BB	AA	BB	AA	AA	AA	AA	BB	AA	AA	BB	AA	BB	AA	BB	AA	BB	AA	AA	BB	BB	BB	AA	AA	AA	AA	AA	BB	AA	AA	BB	AA	BB	BB	BB	AA	AA
7_58308704	AA	BB	-	AA	AA	AA	BB	AA	AA	AA	BB	BB	BB	AA	BB	AA	AA	AA	AA	BB	AA	AA	BB	AA	BB	AA	BB	AA	BB	AA	AA	BB	BB	BB	AA	AA	AA	AA	AA	BB	AA	AA	BB	AA	BB	BB	BB	AA	AA
7_58308716	AA	BB	-	AA	AA	AA	BB	AA	AA	AA	BB	BB	BB	AA	BB	AA	AA	AA	AA	BB	AA	AA	BB	AA	BB	AA	BB	AA	BB	AA	AA	BB	BB	BB	AA	AA	AA	AA	AA	BB	AA	AA	BB	AA	BB	BB	BB	AA	AA
7_59504599	AA	BB	AA	AA	AA	AA	BB	AA	AA	AA	BB	BB	BB	AA	BB	AA	AA	AA	AA	BB	AA	AA	BB	AA	BB	AA	BB	AA	BB	AA	AA	BB	BB	BB	AA	AA	AA	AA	AA	BB	AA	AA	BB	AA	BB	BB	BB	AA	AA
7_59504690	AA	BB	AA	AA	AA	AA	BB	AA	AA	AA	BB	BB	BB	AA	BB	AA	AA	AA	AA	BB	AA	AA	BB	AB	BB	AA	BB	AA	BB	AA	AA	BB	BB	BB	AA	AA	AA	AA	AA	BB	AA	AA	BB	AA	BB	BB	BB	AA	AA
7_68215638	AA	BB	AA	AA	AA	AA	BB	AA	AA	AA	BB	BB	BB	AA	BB	AA	AA	AA	AA	BB	AA	BB	AA	AA	BB	AA	BB	AA	BB	AA	AA	BB	BB	BB	AA	AB	AA	AA	AA	BB	AA	BB	BB	AA	BB	BB	BB	AA	AA
7_69074318	AA	BB	AA	AA	AA	AA	BB	AA	AA	AA	BB	BB	BB	AA	BB	AA	AA	AA	AA	BB	AA	BB	AA	AA	BB	AA	BB	AA	BB	AA	AA	BB	BB	BB	AA	AB	AA	AA	AA	BB	AA	BB	BB	AA	BB	BB	BB	AA	AA
7_69074324	AA	BB	AA	AA	AA	AA	BB	AA	AA	AA	BB	BB	BB	AA	BB	AA	AA	AA	AA	BB	AA	BB	AA	AA	BB	AA	BB	AA	BB	AA	AA	BB	BB	BB	AA	AB	AA	AA	AA	BB	AA	BB	BB	AA	BB	BB	BB	AA	AA
7_69167655	AA	BB	AA	AA	AA	AA	BB	AA	AA	AA	BB	BB	BB	AA	BB	AA	AA	AB	AA	BB	AA	BB	AA	AA	BB	AA	BB	AA	BB	AA	AA	BB	BB	BB	AA	AB	AA	AA	AA	BB	AA	BB	BB	AA	BB	BB	BB	AA	AA
7_69442908	AA	BB	AA	AA	AA	AA	BB	AA	AA	AA	BB	BB	BB	AA	BB	AA	AA	BB	AA	BB	AA	BB	AA	AA	BB	AA	BB	AA	BB	AA	AA	BB	BB	BB	AA	AB	AA	AA	AA	BB	AA	BB	BB	AA	BB	BB	BB	AA	AA
7_69697924	AA	BB	AA	AA	AA	AA	BB	AA	AA	AA	BB	BB	BB	AA	BB	AA	AA	BB	AA	BB	AA	BB	AA	AA	BB	AA	BB	AA	BB	AA	AA	BB	BB	BB	AA	AA	AA	AA	AA	BB	AA	BB	BB	AA	BB	BB	BB	AA	AA
7_69697926	AA	BB	AA	AA	AA	AA	BB	AA	AA	AA	BB	BB	BB	AA	BB	AA	AA	BB	AA	BB	AA	BB	AA	AA	BB	AA	BB	AA	BB	AA	AA	BB	BB	BB	AA	AA	AA	AA	AA	BB	AA	BB	BB	AA	BB	BB	BB	AA	AA
7_70754983	AA	BB	AA	AA	AA	AA	BB	AA	AA	AA	BB	BB	BB	AA	BB	AA	AA	BB	AA	BB	AA	BB	AA	AA	BB	AA	BB	AA	BB	AA	AA	BB	BB	BB	AA	AA	AA	AA	AA	BB	AA	BB	BB	AA	BB	BB	BB	AA	AA
7_70754989	AA	BB	AA	AA	AA	AA	BB	AA	AA	AA	BB	BB	BB	AA	BB	AA	AA	BB	AA	BB	AA	BB	AA	AA	BB	AA	BB	AA	BB	AA	AA	BB	BB	BB	AA	AA	AA	AA	AA	BB	AA	BB	BB	AA	BB	BB	BB	AA	AA
7_70755009	AA	BB	AA	AA	AA	AA	BB	AA	AA	AA	BB	BB	BB	AA	BB	AA	AA	BB	AA	BB	AA	BB	AA	AA	BB	AA	BB	AA	BB	AA	AA	BB	BB	BB	AA	AA	AA	AA	AA	BB	AA	BB	BB	AA	BB	BB	BB	AA	AA
7_71817560	AA	BB	AA	AA	AA	AA	BB	BB	AA	AA	BB	BB	BB	AA	BB	AA	AA	BB	AA	BB	AA	BB	AA	AA	BB	AA	BB	AA	BB	AA	AA	BB	BB	BB	AA	AA	AA	AA	AA	BB	-	BB	BB	AA	BB	BB	BB	AA	AA
7_72277056	AA	BB	AA	AA	AA	AA	BB	BB	AA	AA	BB	BB	BB	AA	BB	AA	AA	BB	AA	BB	AA	BB	AA	AA	BB	AA	BB	AA	BB	AA	AA	BB	BB	BB	AA	AA	AA	AA	AA	BB	AA	BB	BB	AA	BB	BB	BB	AA	AA
7_72437678	AA	BB	AA	AA	AA	AA	BB	BB	AA	AA	BB	BB	BB	AA	BB	AA	AA	BB	AA	BB	AA	BB	AA	AA	BB	AA	BB	AA	BB	AA	AA	BB	BB	BB	AA	AA	AA	AA	AA	BB	AA	BB	BB	AA	BB	BB	BB	AA	AA
7_73101462	AA	BB	AA	AA	AA	AA	BB	BB	AA	AA	BB	BB	BB	AA	BB	AA	AA	BB	AA	BB	AA	BB	AA	AA	BB	AA	BB	AA	BB	AA	AA	AA	BB	BB	AA	AA	AA	AA	AA	BB	AA	BB	BB	AA	BB	BB	BB	AA	AA
7_78135430	AA	AA	AA	AA	AA	AA	BB	BB	AA	AA	AB	BB	BB	AA	AB	AA	AA	BB	AA	BB	AA	BB	AA	AA	BB	AA	BB	AA	BB	AA	AA	AA	AA	BB	AA	AA	AA	AA	AA	BB	BB	BB	BB	AB	BB	BB	BB	AA	AA
7_81234244	AA	AA	AA	AA	AA	AA	BB	BB	BB	AA	BB	BB	BB	AA	BB	AA	AA	BB	AA	BB	AA	BB	AA	AA	BB	AA	BB	AA	BB	AA	AA	AA	AA	BB	AA	AA	AA	AB	BB	BB	BB	BB	BB	AB	BB	BB	BB	AA	AA
7_81234268	AA	AA	AA	AA	AA	AA	BB	BB	BB	AA	BB	BB	BB	AA	BB	AA	AA	BB	AA	BB	AA	BB	AA	AA	BB	AA	BB	AA	BB	AA	AA	AA	AA	BB	AA	AA	AA	AB	BB	BB	BB	BB	BB	AB	BB	BB	BB	AA	AA
7_81236138	AA	AA	AA	AA	AA	AA	BB	BB	BB	AA	BB	BB	BB	AA	AB	AA	AA	BB	AA	BB	AA	BB	AA	AA	BB	AA	BB	AA	BB	AA	AA	AA	AA	BB	AA	AA	AA	AB	BB	BB	BB	BB	BB	AB	BB	BB	BB	AA	AA
7_84212041	AA	AA	AA	AA	AA	AA	BB	BB	BB	AA	BB	BB	BB	AA	AA	AA	AA	BB	AA	BB	AA	BB	AA	AA	BB	AA	BB	AA	BB	AA	AA	AA	AA	BB	AA	AA	AA	AB	BB	BB	BB	BB	BB	AB	BB	BB	BB	AA	AA
7_84458388	AA	AA	AA	AA	AA	AA	BB	BB	BB	AA	BB	BB	BB	AA	AA	AA	AA	BB	AA	BB	AA	BB	AA	AA	BB	AA	BB	AA	BB	AA	AA	AA	AA	BB	AA	AA	AA	AB	BB	BB	BB	BB	BB	AB	BB	BB	BB	AA	AA
7_85135585	AA	AA	AA	AA	AA	AA	BB	BB	BB	AA	BB	BB	BB	AA	AA	AA	AA	BB	AA	BB	AA	BB	AA	AA	BB	AA	BB	AA	BB	AA	AA	AA	AA	BB	AA	AA	AA	AB	BB	BB	BB	BB	BB	AB	BB	BB	BB	AA	AA
7_85135594	AA	AA	AA	AA	AA	AA	BB	BB	BB	AA	BB	BB	BB	AA	AA	AA	AA	BB	AA	BB	AA	BB	AA	AA	BB	AA	BB	AA	BB	AA	AA	AA	AA	BB	AA	AA	AA	AB	BB	BB	BB	BB	BB	AB	BB	BB	BB	AA	AA
7_90266514	AA	AA	AA	AA	AA	AA	BB	BB	BB	AA	BB	BB	BB	AA	AA	AA	AA	BB	AA	BB	AA	AA	AA	AA	BB	AA	BB	AA	BB	AA	AA	AA	AA	BB	AA	AA	AA	BB	BB	AA	BB	BB	BB	AB	BB	AB	BB	AA	AA
7_91364820	AA	AA	AA	AA	AA	AA	BB	BB	BB	AA	BB	BB	BB	AA	AA	AA	AA	BB	AA	BB	AA	BB	AA	AA	BB	AA	BB	AA	BB	AA	AA	AA	AA	BB	AA	AA	AA	BB	BB	AA	BB	BB	BB	AB	BB	BB	BB	AA	AA
7_91364832	AA	AA	AA	AA	AA	AA	BB	BB	BB	AA	BB	BB	BB	AA	AA	AA	AA	BB	AA	BB	AA	BB	AA	AA	BB	AA	BB	AA	BB	AA	AA	AA	AA	BB	AA	AA	AA	BB	BB	AA	BB	BB	BB	AB	BB	BB	BB	AA	AA
7_97934067	AA	AA	AA	AA	AA	BB	BB	BB	BB	AA	BB	BB	BB	AA	AA	AA	AA	BB	AA	BB	AA	AA	AA	AA	BB	AA	BB	AA	BB	AA	AA	AA	AA	BB	AA	AA	AA	BB	BB	AA	BB	BB	BB	AB	BB	BB	BB	AA	AA
7_116208722	AA	AA	AA	AA	AA	BB	BB	BB	BB	AA	BB	AA	BB	AA	AA	AA	BB	BB	AA	AA	AA	AB	BB	AA	BB	AA	BB	AA	BB	AA	AA	AA	AA	BB	AA	BB	AA	BB	BB	AA	BB	BB	BB	BB	BB	BB	BB	AA	AA
7_116208723	AA	AA	AA	AA	AA	BB	BB	BB	BB	AA	BB	AA	BB	AA	AA	AA	BB	BB	AA	AA	AA	AB	BB	AA	BB	AA	BB	AA	BB	AA	AA	AA	AA	BB	AA	BB	AA	BB	BB	AA	BB	BB	BB	BB	BB	BB	BB	AA	AA
7_117458539	AA	AA	AA	AA	AA	BB	BB	BB	BB	AA	BB	AA	BB	AA	AA	AA	BB	BB	AA	AA	AA	AB	BB	AA	BB	AA	BB	AA	BB	AA	AA	AA	AA	BB	AA	BB	AA	BB	BB	AA	BB	BB	BB	BB	BB	BB	BB	AA	AA
7_120831883	AA	AA	-	AA	AA	BB	BB	BB	BB	AA	BB	AA	BB	AA	AA	AA	BB	BB	AA	AA	AA	AB	BB	AA	BB	AA	BB	AA	BB	AA	AA	AA	AA	BB	AA	BB	AA	BB	BB	AA	BB	BB	BB	BB	BB	BB	BB	AA	AA
7_128537822	AA	AA	AA	AA	AA	BB	BB	BB	BB	AA	BB	AA	BB	AA	AA	AA	BB	BB	AA	AA	AA	AB	BB	AA	BB	AA	AA	AA	BB	AA	AA	AA	AA	BB	AA	BB	AA	BB	BB	AA	BB	BB	BB	BB	BB	AB	BB	AA	AA
7_129281046	AA	AA	AA	AA	AA	BB	BB	BB	BB	AA	BB	AA	BB	AA	AA	AA	BB	AA	AA	AA	AA	AB	BB	AA	BB	AA	AA	AA	BB	AA	AA	AA	AA	BB	AA	BB	AA	BB	BB	AA	BB	BB	BB	BB	BB	BB	BB	AA	AA
7_133109533	AA	AA	AA	AA	AA	AB	BB	BB	BB	AA	BB	AA	BB	AA	AA	AA	BB	AA	AA	AA	AA	AB	BB	AA	BB	AA	AA	AA	BB	AA	AA	AA	AA	AA	AA	BB	AA	BB	BB	AA	BB	BB	BB	BB	BB	BB	BB	AA	AA
7_133109575	AA	AA	AA	AA	AA	AB	BB	BB	BB	AA	BB	AA	BB	AA	AA	AA	BB	AA	AA	AA	AA	AB	BB	AA	BB	AA	AA	AA	BB	AA	AA	AA	AA	AA	AA	BB	AA	BB	BB	AA	BB	BB	BB	BB	BB	BB	BB	AA	AA
7_139349551	AA	AA	AA	AA	AA	AB	AA	AA	BB	AA	BB	AA	BB	AA	AA	AA	BB	AA	AA	AA	AA	AB	BB	AA	BB	AA	AA	AA	AA	AA	AA	AA	AA	AA	AA	BB	AA	BB	BB	AA	BB	BB	BB	AB	BB	AB	AA	AA	AA
7_142233013	AA	AA	AA	BB	AA	AB	AA	AA	BB	AA	AA	AA	BB	AA	AA	AA	BB	AA	AA	AA	AA	AB	BB	AA	AA	AA	AA	AA	AA	AA	AA	AA	AA	AB	AA	BB	AA	BB	BB	AA	BB	BB	BB	AB	BB	BB	AA	AA	BB
7_142489274	AA	AA	AA	BB	AA	AB	AA	AA	BB	AA	AA	AA	BB	AA	AA	AA	BB	AA	AA	AA	AA	AB	BB	AA	AA	AA	AA	AA	AA	AA	AA	AA	AA	AB	AA	BB	AA	BB	BB	AA	BB	BB	BB	BB	BB	BB	AA	AA	BB
7_145046011	AA	AA	AA	BB	AA	AA	AA	AA	BB	AA	AA	AA	BB	AA	AA	AA	BB	AA	AB	AA	AA	AB	BB	AA	AA	AA	AA	AA	AA	AA	AA	AA	AA	AB	AA	AB	AA	BB	BB	AA	BB	AB	BB	AB	BB	-	AA	-	BB
7_152900675	AA	AA	AA	BB	AA	AB	AA	AA	BB	AA	AA	AA	BB	AA	AA	BB	BB	AA	AA	AA	BB	BB	BB	AA	AA	AA	AA	AA	BB	AA	AA	AA	AA	AB	AA	AB	AA	BB	BB	BB	BB	AB	AA	AB	BB	BB	AA	AA	BB
7_159857607	AA	AA	AA	BB	AA	AA	AA	AA	AB	AA	AA	AA	BB	AB	AA	AA	BB	AA	AA	AA	BB	AA	AA	AA	AA	AA	BB	AA	BB	AA	AA	AA	AB	BB	AA	AB	AA	BB	BB	BB	AA	AB	AA	BB	BB	BB	AA	AA	AA
7_159857643	AA	AA	AA	BB	AA	AA	AA	AA	AB	AA	AA	AA	BB	AB	AA	AA	BB	AA	AA	AA	BB	AA	AA	AA	AA	AA	BB	AA	BB	AA	AA	AA	AB	BB	AA	AB	AA	BB	BB	BB	AA	AB	AA	BB	BB	BB	AA	AA	AA
7_159857673	AA	AA	AA	BB	AA	AA	AA	AA	AB	AA	AA	AA	BB	AB	AA	AA	BB	AA	AA	AA	BB	AA	AA	AA	AA	AA	BB	AA	BB	AA	AA	AA	AB	BB	AA	AB	AA	BB	BB	BB	AA	AB	AA	BB	BB	BB	AA	AA	AA
7_159857676	AA	AA	AA	BB	AA	AA	AA	AA	AB	AA	AA	AA	BB	AB	AA	AA	BB	AA	AA	AA	BB	AA	AA	AA	AA	AA	BB	AA	BB	AA	AA	AA	AB	BB	AA	AB	AA	BB	BB	BB	AA	AB	AA	BB	BB	BB	AA	AA	AA
7_164472862	BB	AA	BB	BB	AA	AA	AA	AA	AA	AA	AA	AA	BB	AB	AA	AA	BB	AA	AA	AA	AA	AA	AA	AA	AA	AA	AA	AA	BB	AA	AA	AA	AB	BB	AA	AB	AA	BB	BB	BB	AA	AB	AA	BB	BB	BB	AA	AA	AA
7_164472930	BB	AA	BB	BB	AA	AA	AA	AA	AA	AA	AA	AA	BB	AB	AA	AA	BB	AA	AA	AA	AA	AA	AA	AA	AA	AA	AA	AA	BB	AA	AA	AA	AB	BB	AA	AB	AA	BB	BB	BB	AA	AB	AA	BB	BB	BB	AA	AA	AA
7_166243410	BB	AA	BB	BB	AA	AA	AA	AA	AA	AA	AA	AA	BB	AB	AA	AA	BB	AA	AA	AA	AA	AA	AA	AA	AA	AA	AA	AA	BB	AA	AA	AA	AB	BB	AA	AB	AA	BB	BB	BB	AA	AB	AA	BB	BB	BB	AA	AA	AA
7_166971907	BB	AA	BB	BB	AA	AA	AA	AA	AA	AA	AA	AA	BB	AB	AA	AA	BB	AA	AA	AA	AA	AA	AA	BB	AA	AA	AA	AA	BB	AA	AA	AA	AB	BB	AA	AB	AA	BB	BB	BB	AA	BB	AA	BB	BB	BB	AA	AA	AA
7_167324134	BB	AA	BB	BB	AA	AA	AA	AA	-	AA	AA	AA	AA	AB	AA	AA	BB	AA	AA	AA	AA	AA	AA	BB	AA	AA	AA	AA	BB	AA	AA	AA	AB	BB	AA	AB	AA	BB	BB	BB	AA	AB	AA	BB	BB	BB	AA	AA	AA
7_172012316	BB	AA	BB	BB	AA	AA	AA	AA	AA	BB	AA	AA	AA	AB	AA	AA	BB	AA	AA	AA	AA	AA	AA	BB	AA	AA	AA	AA	BB	AA	AA	AA	AB	BB	AA	AA	AA	BB	BB	AB	AA	AB	AA	AB	BB	BB	AA	AA	AA
7_172556555	BB	AA	BB	BB	AA	AA	AA	AA	AA	BB	AA	AA	AA	AB	AA	AA	BB	AA	AA	AA	AA	AA	AA	BB	AA	AA	AA	AA	BB	AA	AA	AA	AB	BB	AA	AB	AA	BB	BB	AB	AA	AB	AA	AB	BB	-	AA	AA	AA
7_175172138	BB	AA	BB	BB	AA	AA	AA	AA	AA	BB	AA	AA	AA	AB	AA	AA	BB	AA	AA	AA	AA	AA	AA	BB	AA	AA	AA	AA	BB	AA	AA	AA	AA	BB	AB	AA	AA	BB	BB	AB	AA	AB	AA	AB	BB	BB	AA	AA	AA
7_183989083	BB	AA	BB	BB	AA	AA	AA	AA	AA	BB	AA	AA	AA	BB	AA	AA	BB	AA	AA	AA	AA	AA	AA	BB	AA	AA	AA	AA	BB	AA	AA	AA	BB	BB	AB	AA	AA	BB	BB	AB	AA	AB	AA	AB	BB	AB	AA	AA	AA
7_185135631	BB	AA	BB	BB	AA	AA	AA	AA	AA	BB	AA	AA	AA	BB	AA	AA	BB	AA	AA	AA	AA	AA	AA	BB	AA	AA	AA	AA	BB	AA	AA	AA	BB	BB	AB	AA	AA	BB	BB	AB	AA	BB	AA	AB	BB	AA	AA	AA	AA
7_191182556	BB	AA	BB	AB	AA	AA	AA	AA	AA	BB	AA	AA	AA	BB	AA	AA	BB	AA	AA	AA	AA	BB	AA	BB	AA	AA	AA	AA	BB	AA	AA	AA	BB	BB	AB	AA	AA	BB	BB	AB	AA	BB	AA	BB	BB	AA	AA	AA	AA
8_1201670	BB	AA	BB	BB	BB	AA	BB	AA	AA	BB	AA	AA	BB	BB	AB	BB	AA	AA	BB	AA	AA	AA	BB	AA	AA	AA	AA	AA	BB	AB	AA	BB	AA	AA	AA	BB	AA	BB	BB	BB	BB	AA	BB	AA	BB	BB	AA	BB	BB
8_1505674	BB	AA	BB	BB	BB	AA	BB	AA	AA	BB	AA	AA	BB	BB	AB	BB	AA	AA	BB	AA	AA	AA	BB	AA	AA	AA	AA	AA	BB	AB	AA	BB	AA	AA	AA	BB	AA	BB	BB	BB	BB	AA	BB	AA	BB	BB	AA	BB	BB
8_1965143	BB	AA	BB	BB	BB	AA	BB	AA	AA	BB	AA	AA	BB	BB	AA	BB	AA	AA	BB	AA	AA	AA	BB	AA	AA	AA	AA	AA	BB	AB	AA	BB	AA	AA	AA	BB	AA	BB	BB	BB	BB	AA	BB	AA	BB	BB	AA	BB	-
8_3316581	BB	AA	BB	BB	BB	AA	BB	AA	AA	BB	AA	AA	BB	BB	AB	BB	AA	AA	BB	AA	AA	AA	BB	AA	AA	AA	AA	AA	BB	AB	AA	BB	AA	AA	-	BB	AA	BB	BB	BB	BB	AA	BB	AA	BB	BB	AA	BB	BB
8_3329731	BB	AA	BB	BB	BB	AA	BB	AA	AA	BB	AA	AA	BB	BB	AB	BB	AA	AA	BB	AA	AA	AA	BB	AA	AA	AA	AA	AA	BB	AB	AA	BB	AA	AA	AA	BB	AA	BB	BB	BB	BB	AA	BB	AA	BB	BB	AA	BB	BB
8_5234588	BB	AA	BB	BB	BB	AA	BB	AA	AA	BB	AA	AA	BB	BB	AB	BB	AA	AA	BB	AA	AA	AA	BB	AA	AA	AA	AA	AA	BB	AB	AA	BB	AA	AA	AA	BB	AA	BB	BB	BB	BB	AA	BB	AA	BB	BB	AA	BB	BB
8_5234591	BB	AA	BB	BB	BB	AA	BB	AA	AA	BB	AA	AA	BB	BB	AB	BB	AA	AA	BB	AA	AA	AA	BB	AA	AA	AA	AA	AA	BB	AB	AA	BB	AA	AA	AA	BB	AA	BB	BB	BB	BB	AA	BB	AA	BB	BB	AA	BB	BB
8_5248298	BB	AA	BB	BB	BB	AA	BB	AA	AA	BB	-	AA	BB	BB	AB	BB	AA	AA	BB	AA	AA	AA	BB	AA	AA	AA	AA	AA	BB	AB	AA	BB	-	AA	AA	BB	AA	BB	BB	BB	BB	AA	BB	AA	BB	BB	AA	BB	BB
8_8268562	BB	AA	BB	BB	BB	AA	BB	AA	AA	BB	AA	AA	BB	BB	AB	BB	AA	AA	BB	AA	AA	AA	BB	AA	AA	AA	AA	AA	BB	AB	AA	BB	AA	AA	AA	BB	AA	BB	BB	BB	BB	AA	BB	AA	BB	BB	AA	BB	BB
8_9836024	BB	AA	BB	BB	BB	AA	BB	AA	AA	BB	AA	AA	BB	BB	BB	BB	AA	AA	BB	BB	AA	AA	BB	AA	AA	BB	AA	AA	BB	AB	AA	BB	-	AA	AA	BB	AA	BB	BB	BB	BB	AA	BB	AA	BB	BB	AA	BB	BB
8_9971071	BB	AA	BB	BB	BB	AA	BB	AA	AA	BB	AA	AA	BB	BB	AB	BB	AA	AA	BB	AA	AA	AA	BB	AA	AA	BB	AA	AA	BB	AB	AA	BB	AA	AA	AA	BB	AA	BB	BB	BB	BB	AA	BB	AA	BB	BB	AA	BB	BB
8_10151833	BB	AA	BB	BB	BB	AA	BB	AA	AA	BB	AA	AA	BB	BB	AB	BB	AA	AA	BB	BB	AA	AA	BB	AA	AA	BB	AA	AA	BB	AB	AA	BB	AA	AA	AA	BB	AA	BB	BB	BB	BB	AA	BB	AA	BB	BB	AA	BB	BB
8_10151835	BB	AA	BB	BB	BB	AA	BB	AA	AA	BB	AA	AA	BB	BB	AB	BB	AA	AA	BB	BB	AA	AA	BB	AA	AA	BB	AA	AA	BB	AB	AA	BB	AA	AA	AA	BB	AA	BB	BB	BB	BB	AA	BB	AA	BB	BB	AA	BB	BB
8_10151954	BB	AA	BB	BB	BB	AA	BB	AA	AA	BB	AA	AA	BB	BB	AB	BB	AA	AA	BB	BB	AA	AA	BB	AA	AA	BB	AA	AA	BB	AB	AA	BB	AA	AA	AA	BB	AA	BB	BB	BB	BB	AA	BB	AA	BB	BB	AA	BB	BB
8_10152326	BB	AA	BB	BB	BB	AA	BB	AA	AA	BB	AA	AA	BB	BB	AB	BB	AA	AA	BB	BB	AA	AA	BB	AA	AA	BB	AA	AA	BB	AB	AA	BB	AA	AA	AA	BB	AA	BB	BB	BB	BB	AA	BB	AA	BB	BB	AA	BB	BB
8_12155864	BB	AA	BB	BB	BB	AA	BB	AA	AA	BB	AA	AA	BB	BB	AB	BB	AA	AA	BB	BB	AA	AA	BB	AA	AA	BB	AA	AA	BB	AB	AA	BB	AA	AA	AA	BB	AA	BB	BB	BB	BB	AA	BB	AA	BB	BB	AA	BB	BB
8_12195376	BB	AA	BB	BB	BB	AA	BB	AA	AA	BB	AA	AA	BB	BB	AB	BB	AA	AA	BB	BB	AA	AA	BB	AA	AA	BB	AA	AA	BB	AB	AB	BB	AA	AA	AA	BB	AA	BB	BB	BB	BB	AA	BB	AA	BB	BB	AA	BB	BB
8_13454922	BB	AA	BB	BB	BB	AA	BB	AA	AA	BB	AA	AA	BB	BB	AB	BB	AA	AA	BB	BB	AA	AA	BB	AA	AA	BB	AA	AA	BB	AB	AB	BB	AA	AA	AA	BB	AA	BB	BB	BB	BB	AA	BB	AA	BB	BB	AA	BB	BB
8_13502113	BB	AA	BB	BB	BB	AA	BB	AA	AA	BB	AA	AA	BB	BB	AB	BB	AA	AA	BB	BB	AA	AA	BB	AA	AA	BB	AA	AA	BB	AB	AB	BB	AA	AA	AA	BB	AA	BB	BB	BB	BB	AA	BB	AA	BB	BB	AA	BB	BB
8_13502191	BB	AA	BB	BB	BB	AA	BB	AA	AA	BB	AA	AA	BB	BB	AB	BB	AA	AA	BB	BB	AA	AA	BB	AA	AA	BB	AA	AA	BB	AB	AB	BB	AA	AA	AA	BB	AA	BB	BB	BB	BB	AA	BB	AA	BB	BB	AA	BB	BB
8_13502830	BB	AA	AB	BB	BB	AA	BB	AA	AA	BB	AA	AA	BB	BB	AB	BB	AA	AA	BB	BB	AA	AA	BB	AA	AA	BB	AA	AA	BB	AB	AB	BB	AA	AA	AA	BB	AA	BB	BB	BB	BB	AA	BB	AA	BB	BB	AA	BB	BB
8_15873347	BB	AA	BB	BB	BB	AA	BB	AA	AA	BB	AA	AA	BB	BB	AB	BB	AA	AA	BB	BB	AA	AA	BB	AA	BB	BB	AA	BB	BB	AB	AB	BB	AA	AA	AA	BB	AA	BB	BB	BB	BB	AA	BB	AA	BB	BB	AA	BB	BB
8_16319417	BB	AA	BB	BB	BB	AA	BB	AA	AA	BB	AA	AA	BB	BB	AA	BB	AA	AA	BB	BB	AA	AA	BB	AA	BB	BB	AA	BB	BB	AB	AB	BB	AA	AA	AA	BB	AA	BB	BB	BB	BB	AA	BB	AA	BB	BB	AA	BB	BB
8_16830951	BB	AA	BB	BB	BB	AA	BB	AA	AA	BB	AA	AA	BB	BB	AB	BB	AA	AA	BB	BB	AA	AA	BB	AA	BB	BB	AA	BB	BB	AB	AB	BB	AA	AA	AA	BB	AA	BB	BB	BB	BB	AA	BB	AA	BB	BB	AA	BB	BB
8_18175999	BB	AA	BB	BB	BB	AA	BB	AA	AA	BB	AA	AA	BB	BB	AB	BB	AA	AA	BB	BB	AA	AA	BB	AA	BB	BB	AA	BB	BB	AB	AB	BB	AA	AA	AA	BB	AA	BB	BB	BB	BB	AA	BB	AA	BB	BB	AA	BB	BB
8_18176010	BB	AA	BB	BB	BB	AA	BB	AA	AA	BB	AA	AA	BB	BB	AB	BB	AA	AA	BB	BB	AA	AA	BB	AA	BB	BB	AA	BB	BB	AB	AB	BB	AA	AA	AA	BB	AA	BB	BB	BB	BB	AA	BB	AA	BB	BB	AA	BB	BB
8_18315192	BB	AA	-	BB	BB	AA	BB	AA	AA	BB	AA	AA	BB	BB	AB	BB	AA	AA	BB	BB	AA	AA	BB	AA	BB	BB	AA	BB	BB	AB	AB	BB	AA	AA	AA	BB	AA	BB	BB	BB	BB	AA	BB	AA	BB	BB	AA	BB	-
8_18315252	BB	AA	-	BB	BB	AA	BB	AA	AA	BB	AA	AA	BB	BB	AB	BB	AA	AA	BB	BB	AA	AA	BB	AA	BB	BB	AA	BB	BB	AB	AB	BB	AA	AA	AA	BB	AA	BB	BB	BB	BB	AA	BB	AA	BB	BB	AA	BB	BB
8_18315264	BB	AA	-	BB	BB	AA	BB	AA	AA	BB	AA	AA	BB	BB	AB	BB	AA	AA	BB	BB	AA	AA	BB	AA	BB	BB	AA	BB	BB	AB	AB	BB	AA	AA	AA	BB	AA	BB	BB	BB	BB	AA	BB	AA	BB	BB	AA	BB	BB
8_18315273	BB	AA	-	BB	BB	AA	BB	AA	AA	BB	AA	AA	BB	BB	AB	BB	AA	AA	BB	BB	AA	AA	BB	AA	BB	BB	AA	BB	BB	AB	AB	BB	AA	AA	AA	BB	AA	BB	BB	BB	BB	AA	BB	AA	BB	BB	AA	BB	BB
8_18315759	BB	AA	BB	BB	BB	AA	BB	AA	AA	BB	AA	AA	BB	BB	AB	BB	AA	AA	BB	BB	AA	AA	BB	AA	BB	BB	AA	BB	BB	AB	AB	BB	AA	AA	AA	BB	AA	BB	BB	BB	BB	AA	BB	AA	BB	BB	AA	BB	BB
8_18315789	BB	AA	BB	BB	BB	AA	BB	AA	AA	BB	AA	AA	BB	BB	AB	BB	AA	AA	BB	BB	AA	AA	BB	AA	BB	BB	AA	BB	BB	AB	AB	BB	AA	AA	AA	BB	AA	BB	BB	BB	BB	AA	BB	AA	BB	BB	AA	BB	BB
8_18379453	BB	AA	BB	BB	BB	AA	BB	-	AA	BB	AA	AA	BB	BB	AB	BB	AA	AA	BB	BB	AA	AA	BB	AA	BB	BB	AA	BB	BB	AB	AB	BB	AA	AA	AA	BB	AA	BB	BB	BB	BB	AA	BB	AA	BB	BB	AA	BB	BB
8_18379563	BB	AA	BB	BB	BB	AA	BB	AA	AA	BB	AA	AA	BB	BB	AB	BB	AA	AA	BB	BB	AA	AA	BB	AA	BB	BB	AA	BB	BB	AB	AB	BB	AA	AA	AA	BB	AA	BB	BB	BB	BB	AA	BB	AA	BB	BB	AA	BB	BB
8_18430639	BB	AA	BB	BB	BB	AA	BB	AA	AA	BB	AA	AA	BB	BB	AB	BB	AA	AA	BB	BB	AA	AA	BB	AA	BB	BB	AA	BB	BB	AB	AB	BB	AA	AA	AA	BB	AA	BB	BB	BB	BB	AA	BB	AA	BB	BB	AA	BB	BB
8_18430644	BB	AA	BB	BB	BB	AA	BB	AA	AA	BB	AA	AA	BB	BB	AB	BB	AA	AA	BB	BB	AA	AA	BB	AA	BB	BB	AA	BB	BB	AB	AB	BB	AA	AA	AA	BB	AA	BB	BB	BB	BB	AA	BB	AA	BB	BB	AA	BB	BB
8_18431500	BB	AA	BB	BB	BB	AA	BB	AA	AA	BB	AA	AA	BB	BB	AB	BB	AA	AA	BB	BB	AA	AA	BB	AA	BB	BB	AA	BB	BB	AB	AB	BB	AA	AA	AA	BB	AA	BB	BB	BB	BB	AA	BB	AA	BB	BB	AA	BB	BB
8_18431514	BB	AA	BB	BB	BB	AA	BB	AA	AA	BB	AA	AA	BB	BB	AB	BB	AA	AA	BB	BB	AA	AA	BB	AA	BB	BB	AA	BB	BB	AB	AB	BB	AA	AA	AA	BB	AA	BB	BB	BB	BB	AA	BB	AA	BB	BB	AA	BB	BB
8_21191312	BB	AA	BB	BB	BB	AA	BB	AA	AA	BB	AA	AA	BB	BB	AB	BB	AA	-	BB	BB	AA	AA	BB	AA	BB	BB	AA	BB	BB	AB	BB	BB	AA	AA	AA	BB	AA	BB	BB	BB	BB	AA	BB	AA	BB	BB	AA	BB	BB
8_22794006	AA	AA	AA	BB	BB	AA	BB	AA	AA	BB	AA	AA	BB	BB	AB	BB	AA	AA	BB	BB	AA	AA	BB	AA	BB	BB	AA	BB	BB	AB	AB	BB	AA	AA	AA	BB	AA	BB	BB	BB	BB	AA	BB	AA	BB	BB	AA	BB	BB
8_30804754	AA	AA	AB	BB	BB	AA	BB	AA	AA	BB	AA	AA	AA	BB	BB	BB	BB	AA	BB	AB	AA	AA	BB	AA	BB	BB	AB	BB	BB	AA	AA	BB	AA	AA	AA	AA	AA	BB	BB	BB	BB	AA	AA	AA	BB	BB	AA	BB	BB
8_32589431	AA	AA	AB	BB	BB	AA	BB	AA	AA	BB	AA	AA	AA	BB	AA	BB	BB	AA	BB	AB	AA	AA	BB	AA	BB	BB	AB	BB	BB	AA	AA	BB	AA	AA	AA	AA	AA	BB	BB	BB	BB	AA	AA	AA	BB	BB	AA	BB	BB
8_39924602	AA	AA	AB	BB	BB	AA	BB	AA	AA	BB	AA	AA	AA	AA	AA	BB	BB	AA	BB	AB	AB	AA	BB	AA	BB	BB	AB	BB	BB	AA	AA	BB	AA	AA	AA	AA	AA	BB	BB	BB	BB	AA	AA	AA	AB	BB	AA	BB	BB
8_42336481	AA	AA	AB	BB	BB	AA	BB	AA	AA	BB	AA	AA	AA	AA	AA	BB	BB	AA	BB	AB	AB	AA	BB	AA	BB	BB	AB	BB	BB	AA	AA	BB	AA	AA	AA	AA	AA	BB	BB	BB	BB	AA	AA	AA	AB	BB	AA	BB	BB
8_42822883	AA	AA	AB	BB	BB	AA	BB	AA	AA	BB	AA	AA	AA	AA	AA	BB	BB	AA	BB	AB	AB	AA	BB	AA	BB	BB	AB	BB	BB	AA	AA	BB	AA	AA	AA	AA	AA	BB	BB	BB	BB	AA	AA	AA	AB	BB	AA	BB	BB
8_42822931	AA	AA	AB	BB	BB	AA	BB	AA	AA	BB	AA	AA	AA	AA	AA	BB	BB	AA	BB	AB	AB	AA	BB	AA	BB	BB	AB	BB	BB	AA	AA	BB	AA	AA	AA	AA	AA	BB	BB	BB	BB	AA	AA	AA	AB	BB	AA	BB	BB
8_42822940	AA	AA	AB	BB	BB	AA	BB	AA	AA	BB	AA	AA	AA	AA	AA	BB	BB	AA	BB	AB	AB	AA	BB	AA	BB	BB	AB	BB	BB	AA	AA	BB	AA	AA	AA	AA	AA	BB	BB	BB	BB	AA	AA	AA	AB	BB	AA	BB	BB
8_42822958	AA	AA	AB	BB	BB	AA	BB	AA	AA	BB	AA	AA	AA	AA	AA	BB	BB	AA	BB	AB	AB	AA	BB	AA	BB	BB	AB	BB	BB	AA	AA	BB	AA	AA	AA	AA	AA	BB	BB	BB	BB	AA	AA	AA	AB	BB	AA	BB	BB
8_42822992	AA	AA	AB	BB	BB	AA	BB	AA	AA	BB	AA	AA	AA	AA	AA	BB	BB	AA	BB	AB	AB	AA	BB	AA	BB	BB	AB	BB	BB	AA	AA	BB	AA	AA	AA	AA	AA	BB	BB	BB	BB	AA	AA	AA	AB	BB	AA	BB	BB
8_42823006	AA	AA	AB	BB	BB	AA	BB	AA	AA	BB	AA	AA	AA	AA	AA	BB	BB	AA	BB	AB	AB	AA	BB	AA	BB	BB	AB	BB	BB	AA	AA	BB	AA	AA	AA	AA	AA	BB	BB	BB	BB	AA	AA	AA	AB	BB	AA	BB	BB
8_42823072	AA	AA	AB	BB	BB	AA	BB	AA	AA	BB	AA	AA	AA	AA	AA	BB	BB	AA	BB	AB	AB	AA	BB	AA	BB	BB	AB	BB	BB	AA	AA	BB	AA	AA	AA	AA	AA	BB	BB	BB	BB	AA	AA	AA	AB	BB	AA	BB	BB
8_42823077	AA	AA	AB	BB	BB	AA	BB	AA	AA	BB	AA	AA	AA	AA	AA	BB	BB	AA	BB	AB	AB	AA	BB	AA	BB	BB	AB	BB	BB	AA	AA	BB	AA	AA	AA	AA	AA	BB	BB	BB	BB	AA	AA	AA	AB	BB	AA	BB	BB
8_50474144	BB	AA	BB	BB	BB	AB	AA	AA	AA	BB	-	AA	AA	AA	AA	BB	AA	AA	BB	AA	AB	AA	BB	AA	BB	BB	BB	BB	BB	AA	AA	BB	AA	AA	BB	AA	AA	BB	BB	AA	BB	AA	AA	AA	AA	AA	BB	BB	BB
8_50474145	BB	AA	BB	BB	BB	AB	AA	AA	AA	BB	-	AA	AA	AA	AA	BB	AA	AA	BB	AA	AB	AA	BB	AA	BB	BB	BB	BB	BB	AA	AA	BB	AA	AA	BB	AA	AA	BB	BB	AA	BB	AA	AA	AA	AA	AA	BB	BB	BB
8_66004054	BB	AA	BB	BB	AA	AA	AA	AA	AA	BB	BB	AA	AA	AA	AA	BB	AA	AA	BB	BB	BB	AA	BB	AA	AB	BB	BB	BB	BB	AA	AA	BB	BB	AA	BB	AA	BB	BB	BB	AA	BB	BB	AA	AA	AA	AA	BB	BB	BB
8_66004106	BB	AA	BB	BB	AA	AA	AA	AA	AA	BB	BB	AA	AA	AA	AA	BB	AA	AA	BB	BB	BB	AA	BB	AA	AB	BB	BB	BB	BB	AA	AA	BB	BB	AA	BB	AA	BB	BB	BB	AA	BB	BB	AA	AA	AA	AA	BB	BB	BB
8_66004341	BB	AA	BB	BB	AB	AA	AA	AA	AA	BB	BB	AA	AA	AA	AA	BB	AA	AA	BB	BB	BB	AA	BB	AA	AB	BB	BB	BB	BB	AA	AA	BB	BB	AA	BB	AA	BB	BB	BB	AA	BB	BB	AA	AA	AA	AA	BB	BB	BB
8_67646272	BB	AA	BB	BB	AB	AA	AA	AA	AA	AA	BB	AA	AA	AA	AA	BB	AA	AA	BB	BB	BB	AA	BB	AA	AB	BB	BB	BB	BB	AA	AA	BB	BB	AA	BB	AA	BB	BB	BB	AA	BB	BB	AA	AA	AA	AA	BB	BB	BB
8_67646358	BB	AA	BB	BB	AB	AA	AA	AA	AA	AA	BB	AA	AA	AA	AA	BB	AA	AA	BB	BB	BB	AA	BB	AA	AB	BB	BB	BB	BB	AA	AA	BB	BB	AA	BB	AA	BB	BB	BB	AA	BB	BB	AA	AA	AA	AA	BB	BB	BB
8_67928807	BB	AA	BB	BB	BB	AA	AA	AA	AA	AA	BB	AA	AA	AA	AA	BB	BB	AA	BB	BB	BB	AA	BB	AA	AB	BB	BB	BB	BB	AA	AA	BB	BB	AA	BB	AA	BB	BB	BB	AA	BB	BB	AA	AA	AA	AA	BB	BB	BB
8_67928819	BB	AA	BB	BB	BB	AA	AA	AA	AA	AA	BB	AA	AA	AA	AA	BB	BB	AA	BB	BB	BB	AA	BB	AA	AB	BB	BB	BB	BB	AA	AA	BB	BB	AA	BB	AA	BB	BB	BB	AA	BB	BB	AA	AA	AA	AA	BB	BB	BB
8_67928827	BB	AA	BB	BB	BB	AA	AA	AA	AA	AA	BB	AA	AA	AA	AA	BB	BB	AA	BB	BB	BB	AA	BB	AA	AB	BB	BB	BB	BB	AA	AA	BB	BB	AA	BB	AA	BB	BB	BB	AA	BB	BB	AA	AA	AA	AA	BB	BB	BB
8_67928862	BB	AA	BB	BB	BB	AA	AA	AA	AA	AA	BB	AA	AA	AA	AA	BB	BB	AA	BB	BB	BB	AA	BB	AA	AB	BB	BB	BB	BB	AA	AA	BB	BB	AA	BB	AA	BB	BB	BB	AA	BB	BB	AA	AA	AA	AA	BB	BB	BB
8_67928886	BB	AA	BB	BB	BB	AA	AA	AA	AA	AA	BB	AA	AA	AA	AA	BB	BB	AA	BB	BB	BB	AA	BB	AA	AB	BB	BB	BB	BB	AA	AA	BB	BB	AA	BB	AA	BB	BB	BB	AA	BB	BB	AA	AA	AA	AA	BB	BB	BB
8_68797508	BB	AA	BB	BB	AB	AA	AA	AA	AA	AA	BB	AA	AA	AA	AA	BB	AA	AA	BB	BB	BB	AA	BB	AA	AB	BB	BB	BB	BB	AA	AA	BB	BB	AA	BB	AA	BB	BB	BB	AA	BB	BB	AA	AA	AA	AA	BB	BB	BB
8_69637047	BB	AA	BB	BB	AA	AA	AA	AA	AA	AA	BB	AA	AA	AA	AA	BB	BB	AA	BB	BB	BB	AA	BB	AA	AB	BB	BB	BB	BB	AA	AA	BB	BB	AA	BB	AA	BB	BB	BB	AA	BB	BB	AA	AA	AA	AA	BB	BB	BB
8_69860880	BB	AA	BB	BB	AB	AA	AA	AA	AA	AA	BB	AA	AA	AA	AA	BB	BB	AA	BB	BB	BB	AA	BB	AA	AB	BB	BB	BB	BB	AA	AA	BB	BB	AA	BB	AA	BB	BB	BB	AA	BB	BB	AA	AA	AA	AA	BB	BB	BB
8_72268106	BB	AA	BB	BB	AB	AA	AA	AA	AA	AA	BB	AA	AA	AA	AB	BB	BB	AA	BB	BB	BB	AA	BB	AA	AB	BB	BB	BB	BB	AB	AA	BB	BB	AA	BB	AA	BB	BB	BB	AA	BB	BB	AA	AA	AA	AA	BB	BB	BB
8_72579184	BB	AA	BB	BB	AB	AA	AA	AA	AA	AA	BB	AA	AA	AA	AA	BB	BB	AA	BB	BB	BB	AA	BB	AA	AB	BB	BB	BB	BB	AB	AA	BB	BB	AA	BB	AA	BB	BB	BB	AA	BB	BB	AA	AA	AA	AA	BB	BB	BB
8_72926696	BB	AA	BB	BB	AB	AA	AA	AA	AA	AA	BB	AA	AA	AA	AA	BB	BB	AA	BB	BB	BB	AA	BB	AA	AB	BB	BB	BB	BB	AB	AA	BB	BB	AA	BB	AA	BB	BB	BB	AA	BB	BB	AA	AA	AA	AA	BB	BB	BB
8_74835004	BB	AA	BB	BB	AB	AA	AA	AA	AA	AA	BB	AA	AA	AA	AA	BB	BB	AA	BB	BB	BB	AA	BB	AA	AB	BB	BB	BB	BB	AB	AA	BB	BB	AA	BB	AA	BB	BB	BB	AA	BB	BB	AA	AA	AA	AA	BB	BB	BB
8_74835056	BB	AA	BB	BB	AB	AA	AA	AA	AA	AA	BB	AA	AA	AA	AA	BB	BB	AA	BB	BB	BB	AA	BB	AA	AB	BB	BB	BB	BB	AB	AA	BB	BB	AA	BB	AA	BB	BB	BB	AA	BB	BB	AA	AA	AA	AA	BB	BB	BB
8_75141081	BB	AA	BB	BB	AB	AA	AA	AA	AA	AA	BB	AA	AA	AA	AA	BB	BB	AA	BB	BB	BB	AA	BB	AA	AB	BB	BB	BB	BB	AB	AA	BB	BB	AA	BB	AA	BB	BB	BB	AA	BB	BB	AA	AA	AA	AA	AA	BB	BB
8_75659917	BB	AA	BB	BB	AB	AA	AA	AA	AA	AA	BB	AA	AA	AA	AA	BB	BB	AA	BB	BB	BB	AA	BB	AA	AB	BB	BB	BB	AB	AB	AA	BB	BB	AA	BB	AA	BB	BB	BB	AA	BB	BB	AA	AA	AA	BB	AA	BB	BB
8_75659923	BB	AA	BB	BB	AB	AA	AA	AA	AA	AA	BB	AA	AA	AA	AA	BB	BB	AA	BB	BB	BB	AA	BB	AA	AB	BB	BB	BB	AB	AB	AA	BB	BB	AA	BB	AA	BB	BB	BB	AA	BB	BB	AA	AA	AA	BB	AA	BB	BB
8_76000585	BB	AA	BB	BB	AB	AA	AA	AA	AA	AA	BB	AA	AA	AA	AA	BB	BB	AA	BB	BB	BB	AA	BB	AA	AB	BB	BB	BB	BB	AB	AA	BB	BB	AA	BB	AA	BB	BB	BB	AA	BB	BB	AA	AA	AA	BB	AA	BB	BB
8_76138008	BB	AA	BB	BB	AB	AA	AA	AA	AA	AA	BB	AA	AA	AA	AA	BB	BB	AA	BB	BB	BB	AA	BB	AA	AB	BB	BB	BB	BB	AB	AA	BB	BB	AA	BB	AA	BB	BB	BB	AA	BB	BB	AA	AA	AA	BB	AA	BB	BB
8_76142254	BB	AA	BB	BB	AB	AA	AA	AA	AA	AA	-	AA	AA	AA	AA	BB	BB	AA	BB	BB	BB	AA	BB	AA	AB	BB	BB	BB	BB	AB	AA	BB	BB	AA	BB	AA	BB	-	BB	AA	BB	BB	AA	AA	AA	BB	AA	BB	BB
8_87609136	BB	AA	BB	AA	AB	AA	BB	AA	AA	AA	-	AA	BB	AA	AA	BB	BB	AA	BB	BB	BB	AA	AA	AA	AB	BB	BB	BB	BB	BB	AA	BB	BB	AA	BB	AA	BB	BB	BB	AA	BB	AA	AA	AA	AA	BB	AA	AB	AA
8_88183621	BB	AA	BB	AA	AB	AA	BB	AA	AA	AA	BB	AA	BB	AA	AA	BB	BB	AA	BB	BB	BB	AA	AA	AA	AB	BB	BB	BB	BB	AB	AA	BB	BB	AA	BB	AA	BB	BB	BB	AA	BB	AA	AA	AA	AA	BB	AA	AB	AA
8_88183635	BB	AA	BB	AA	AB	AA	BB	AA	AA	AA	BB	AA	BB	AA	AA	BB	BB	AA	BB	BB	BB	AA	AA	AA	AB	BB	BB	BB	BB	AB	AA	BB	BB	AA	BB	AA	BB	BB	BB	AA	BB	AA	AA	AA	AA	BB	AA	AB	AA
8_94407756	BB	AA	BB	AA	AB	AA	BB	AA	AA	BB	BB	AA	BB	AA	AA	BB	BB	AA	AA	BB	BB	AA	AA	AA	AB	BB	BB	BB	BB	AB	AA	BB	BB	AA	BB	AA	BB	BB	BB	AA	BB	AA	AA	AA	AA	BB	AA	BB	-
8_94408424	BB	AA	BB	AA	AB	AA	BB	AA	AA	BB	BB	AA	BB	AA	AA	BB	BB	AA	AA	BB	BB	AA	AA	AA	AB	BB	BB	BB	AB	AB	AA	BB	BB	AA	BB	AA	BB	BB	BB	AA	BB	AA	AA	AA	AA	BB	AA	BB	AB
8_94408425	BB	AA	BB	AA	AB	AA	BB	AA	AA	BB	BB	AA	BB	AA	AA	BB	BB	AA	AA	BB	BB	AA	AA	AA	AB	BB	BB	BB	AB	AB	AA	BB	BB	AA	BB	AA	BB	BB	BB	AA	BB	AA	AA	AA	AA	BB	AA	BB	AB
8_94511478	BB	AA	BB	AA	AB	AA	BB	AA	AA	BB	BB	BB	BB	AA	AA	BB	BB	AA	AA	BB	BB	AA	AA	AA	AB	BB	BB	BB	BB	AB	AA	BB	BB	AA	BB	AA	AA	BB	BB	AA	BB	AA	AA	AA	AA	BB	AA	BB	AA
8_102304438	BB	AA	BB	AA	AB	AA	BB	BB	AA	AA	BB	BB	BB	BB	AA	BB	BB	AA	AA	BB	BB	AA	-	AA	AB	BB	BB	BB	BB	AB	AA	BB	BB	AA	BB	AA	AA	BB	BB	AA	BB	AA	AA	BB	AA	BB	AA	BB	BB
8_103039187	BB	AA	BB	AA	AB	AA	BB	BB	AA	AA	BB	BB	BB	BB	AA	BB	BB	AA	AA	BB	BB	AA	AA	AA	AB	BB	BB	BB	BB	AB	AA	BB	BB	AA	BB	AA	AA	BB	BB	AA	BB	AA	AA	BB	AA	BB	AA	BB	AB
8_104513956	BB	AA	BB	AA	AB	AA	BB	BB	AA	AA	BB	BB	BB	BB	AA	BB	BB	AA	AA	BB	BB	AA	AA	AA	AB	BB	BB	BB	BB	AB	AA	BB	BB	AA	BB	AA	AA	BB	BB	AA	BB	AA	AA	BB	AA	BB	AA	BB	AB
8_104563051	BB	AA	BB	AA	BB	AA	BB	BB	AA	AA	BB	BB	BB	BB	AA	BB	BB	AA	AA	BB	BB	AA	AA	AA	AB	BB	BB	BB	BB	AB	AA	BB	BB	AA	BB	AA	AA	BB	BB	AA	BB	AA	AA	BB	AA	BB	AA	BB	AB
8_104563663	BB	AA	-	AA	AA	AA	BB	BB	AA	AA	BB	BB	BB	BB	AA	BB	BB	AA	AA	BB	BB	AA	AA	AA	AB	BB	BB	BB	BB	AB	AA	BB	-	AA	BB	AA	AA	BB	BB	AA	BB	AA	AA	BB	AA	BB	AA	BB	AA
8_122845282	AA	AA	AA	AA	-	AA	BB	BB	AA	AA	AB	BB	BB	BB	BB	BB	BB	AA	AA	BB	BB	AA	AA	BB	BB	BB	BB	BB	BB	AB	AA	AA	BB	AA	BB	AA	AA	BB	BB	AA	BB	AA	AA	BB	AA	BB	AA	BB	AA
8_123011772	AA	AA	AA	AA	AB	AA	BB	BB	AA	AA	AB	BB	BB	BB	BB	BB	BB	AA	AA	BB	BB	AA	AA	BB	BB	BB	BB	BB	BB	AB	AA	AA	BB	BB	BB	AA	AA	BB	BB	AA	BB	AA	AA	BB	AA	BB	AA	BB	AA
8_124396371	AA	AA	AA	AA	AB	AA	BB	BB	AA	AA	AB	BB	BB	BB	BB	BB	BB	AA	AA	BB	BB	AA	AA	BB	BB	BB	BB	BB	BB	AB	AA	AA	BB	BB	BB	AA	AA	BB	BB	AA	BB	AA	AA	BB	AA	BB	AA	BB	AA
8_124481077	AA	AA	AA	AA	AB	AA	BB	BB	AA	AA	AB	BB	BB	BB	BB	BB	BB	AA	AA	BB	BB	AA	AA	BB	BB	BB	BB	BB	AB	AB	AA	AA	BB	BB	BB	AA	AA	BB	BB	AA	BB	AA	AA	BB	AA	BB	AA	BB	AA
8_125082871	AA	AA	AA	AA	AB	AA	BB	BB	AA	AA	AA	BB	BB	BB	BB	BB	BB	AA	AA	BB	BB	AA	AA	BB	BB	BB	BB	BB	BB	AB	AA	AA	BB	BB	BB	AA	AA	BB	BB	AA	BB	AA	AA	BB	AA	BB	AA	BB	AA
8_125415882	AA	AA	AA	AA	AB	AA	BB	BB	AA	AA	AB	BB	BB	BB	BB	BB	BB	AA	AA	BB	BB	AA	AA	BB	BB	BB	BB	AB	BB	AB	AA	AA	BB	BB	BB	AA	AA	BB	BB	AA	BB	AA	AA	BB	AA	BB	AA	BB	AA
8_125415930	AA	AA	AA	AA	AB	AA	BB	BB	AA	AA	AB	BB	BB	BB	BB	BB	BB	AA	AA	BB	BB	AA	AA	BB	BB	BB	BB	BB	BB	AB	AA	AA	BB	BB	BB	AA	AA	BB	BB	AA	BB	AA	AA	BB	AA	BB	AA	BB	AA
8_126201831	AA	AA	AA	AA	AB	AA	BB	BB	AA	AA	BB	BB	AA	BB	BB	BB	BB	AA	AA	BB	BB	AA	AA	BB	BB	BB	BB	BB	BB	AA	AA	AA	BB	BB	BB	AA	AA	BB	BB	AA	BB	AA	AA	BB	BB	BB	AA	BB	-
8_127059587	AA	AA	AA	AA	AB	AA	BB	BB	AA	AA	AB	BB	AA	BB	BB	BB	BB	AA	AA	BB	BB	AA	AA	BB	BB	BB	BB	BB	BB	AA	AA	AA	BB	BB	BB	AA	AA	BB	BB	AA	BB	AA	AA	BB	BB	BB	AA	BB	AA
8_127831553	AA	AA	AA	AA	AB	AA	BB	BB	AA	AA	AB	BB	AA	BB	BB	BB	BB	AA	AA	BB	BB	AA	AA	BB	BB	BB	BB	BB	BB	AA	AA	AA	BB	BB	BB	AA	AA	BB	BB	AA	BB	AA	AA	BB	BB	AB	AA	BB	AA
8_128882856	AA	AA	AA	AA	AB	AA	BB	BB	AA	AA	AB	BB	AA	BB	BB	BB	BB	AA	AA	BB	BB	AA	AA	BB	BB	BB	BB	BB	BB	AA	AA	AA	BB	BB	BB	AA	AA	BB	BB	AA	BB	AA	AA	BB	BB	BB	AA	AB	AA
8_133047824	AA	AA	AA	AA	AB	AA	BB	BB	AA	AA	AB	BB	AA	BB	BB	BB	BB	AA	AA	BB	BB	AA	AA	BB	BB	BB	BB	AB	BB	AA	AA	AA	BB	BB	BB	AA	AA	BB	BB	AA	BB	AA	AA	BB	BB	BB	AA	AB	AA
8_133077821	AA	AA	AA	AA	AB	AA	BB	BB	AA	AA	AB	BB	AA	BB	BB	BB	BB	AA	AA	BB	BB	AA	AA	BB	BB	BB	BB	AB	BB	AA	AA	AA	BB	BB	BB	AA	AA	BB	BB	AA	BB	AA	AA	BB	BB	BB	AA	AB	AA
8_133077830	AA	AA	AA	AA	AB	AA	BB	BB	AA	AA	AB	BB	AA	BB	BB	BB	BB	AA	AA	BB	BB	AA	AA	BB	BB	BB	BB	AB	BB	AA	AA	AA	BB	BB	BB	AA	AA	BB	BB	AA	BB	AA	AA	BB	BB	BB	AA	AB	AA
8_133792800	AA	AA	AA	AA	AB	AA	BB	BB	AA	AA	AB	BB	AA	BB	BB	BB	BB	AA	AA	BB	BB	AA	AA	BB	BB	BB	BB	AB	BB	AA	AA	AA	BB	BB	BB	AA	AA	BB	BB	AA	BB	AA	AA	BB	BB	BB	AA	AB	AA
8_133962300	AA	AA	AA	AA	AB	AA	BB	BB	AA	AA	AB	BB	AA	BB	BB	BB	BB	AA	AA	BB	BB	AA	AA	BB	BB	BB	BB	AB	BB	AA	AA	AA	BB	BB	BB	AA	AA	BB	BB	AA	BB	AA	AA	BB	BB	BB	AA	AB	AA
8_133962304	AA	AA	AA	AA	AB	AA	BB	BB	AA	AA	AB	BB	AA	BB	BB	BB	BB	AA	AA	BB	BB	AA	AA	BB	BB	BB	BB	AB	BB	AA	AA	AA	BB	BB	BB	AA	AA	BB	BB	AA	BB	AA	AA	BB	BB	BB	AA	AB	AA
8_134502697	AA	AA	AA	AA	AB	AA	BB	BB	AA	AA	AB	BB	AA	BB	BB	BB	BB	AA	AA	BB	BB	AA	AA	BB	BB	BB	BB	AB	BB	AA	AA	AA	BB	BB	BB	AB	AA	BB	BB	AA	BB	AA	AA	BB	BB	BB	AA	AB	AA
8_134502744	AA	AA	AA	AA	AB	AA	BB	BB	AA	AA	AB	BB	AA	BB	BB	BB	BB	AA	AA	BB	BB	AA	AA	BB	BB	BB	BB	AB	BB	AA	AA	AA	BB	BB	BB	AB	AA	BB	BB	AA	BB	AA	AA	BB	BB	BB	AA	AB	AA
8_138068069	AA	AA	AA	AA	AB	AA	BB	-	AA	AA	AB	BB	AA	BB	BB	BB	BB	AA	AA	BB	BB	AA	AA	BB	BB	BB	AA	AB	BB	AA	AA	BB	BB	BB	BB	AB	AA	BB	BB	AA	AA	AA	AA	-	BB	BB	AA	AB	AA
8_138406232	AA	AA	AA	AA	BB	AA	BB	BB	AA	AA	AB	BB	AA	BB	BB	BB	BB	AA	AA	BB	BB	AA	AA	BB	BB	BB	AA	AB	BB	AA	AA	BB	BB	BB	BB	AB	AA	BB	BB	AA	AA	AA	AA	BB	BB	BB	AA	AB	AA
8_138833891	AA	AA	AA	AA	AB	AA	BB	BB	AA	AA	AB	BB	AA	BB	BB	BB	BB	AA	AA	BB	BB	AA	AA	BB	BB	BB	AA	AB	BB	AA	AA	BB	BB	BB	BB	AB	AA	BB	BB	AA	AA	AA	AA	BB	BB	BB	AA	AB	AA
8_141438301	AA	AA	AA	AA	AB	AA	BB	BB	AA	AA	AB	BB	AA	BB	BB	BB	BB	AA	AA	BB	BB	AA	AA	BB	BB	BB	AA	AB	BB	AA	AA	BB	BB	BB	BB	AB	AA	BB	BB	AA	AA	AA	AA	BB	BB	BB	AA	AB	AA
8_143246921	AA	AA	AA	AA	AB	AA	BB	BB	AA	AA	AB	BB	AA	BB	BB	BB	BB	AA	AA	BB	BB	AA	AA	BB	BB	BB	AA	AB	BB	AA	AA	BB	BB	BB	BB	AB	AA	BB	AA	AA	AA	AA	AA	BB	BB	BB	AA	AB	AA
8_144248872	AA	AA	AA	AA	AB	AA	BB	BB	AA	AA	AA	BB	AA	BB	BB	BB	BB	AA	AA	BB	BB	AA	AA	BB	BB	BB	AA	AB	BB	AA	AA	BB	BB	BB	BB	AB	AA	BB	AA	AA	AA	AA	AA	BB	BB	BB	AA	AB	AA
8_144248911	AA	AA	AA	AA	AB	AA	BB	BB	AA	AA	AB	BB	AA	BB	BB	BB	BB	AA	AA	BB	BB	AA	AA	BB	BB	BB	AA	AB	BB	AA	AA	BB	BB	BB	BB	AB	AA	BB	AA	AA	AA	AA	AA	BB	BB	BB	AA	AB	AA
8_146224043	AA	AA	AA	AA	AB	AA	BB	BB	AA	AA	BB	BB	AA	BB	BB	BB	BB	AA	AA	BB	BB	AA	AA	BB	BB	BB	AA	AB	BB	AA	AA	BB	BB	BB	BB	AB	AA	BB	AA	AA	AA	AA	AA	BB	BB	BB	-	AA	AA
8_146224050	AA	AA	AA	AA	AB	AA	BB	BB	AA	AA	BB	BB	AA	BB	BB	BB	BB	AA	AA	BB	BB	AA	AA	BB	BB	BB	AA	AB	BB	AA	AA	BB	BB	BB	BB	AB	AA	BB	AA	AA	AA	AA	AA	BB	BB	BB	-	AA	AA
8_146224076	AA	AA	AA	AA	AB	AA	BB	BB	AA	AA	BB	BB	AA	BB	BB	BB	BB	AA	AA	BB	BB	AA	AA	BB	BB	BB	AA	AB	BB	AA	AA	BB	BB	BB	BB	AB	AA	BB	AA	AA	AA	AA	AA	BB	BB	BB	-	AA	AA
8_146224118	AA	AA	AA	AA	AB	AA	BB	BB	AA	AA	BB	BB	AA	BB	BB	BB	BB	AA	AA	BB	BB	AA	AA	BB	BB	BB	AA	AB	BB	AA	AA	BB	BB	BB	BB	AB	AA	BB	AA	AA	AA	AA	AA	BB	BB	BB	-	AA	AA
8_150388109	AA	AA	AA	AA	AA	AA	BB	BB	AA	AB	AA	BB	BB	BB	BB	BB	BB	AA	AA	BB	BB	AA	AA	BB	BB	BB	AA	AB	BB	AA	AA	BB	AA	BB	BB	AB	AB	BB	AA	AA	AA	AA	AA	BB	BB	BB	AA	AA	AA
8_154119877	AA	AA	AA	AA	AA	AA	BB	AB	AA	AB	AA	BB	BB	BB	BB	BB	BB	AA	AA	BB	BB	AA	AA	BB	BB	BB	AA	AB	BB	AA	AA	BB	AA	BB	BB	AB	BB	BB	AA	AA	AA	AA	AA	BB	BB	BB	AA	AA	AA
8_156146654	AA	AA	AA	AA	AA	AA	BB	BB	AA	AA	AA	BB	BB	BB	BB	BB	BB	AA	AA	BB	BB	AA	AA	BB	BB	BB	AA	AB	BB	AA	AA	BB	AA	BB	BB	AB	BB	BB	AA	AA	AA	AA	AA	BB	BB	BB	AA	AA	AA
8_156146657	AA	AA	AA	AA	AA	AA	BB	BB	AA	AA	AA	BB	BB	BB	BB	BB	BB	AA	AA	BB	BB	AA	AA	BB	BB	BB	AA	AB	BB	AA	AA	BB	AA	BB	BB	AB	BB	BB	AA	AA	AA	AA	AA	BB	BB	BB	AA	AA	AA
8_159740300	AA	AA	AA	AA	AA	AA	BB	BB	BB	AA	AA	BB	BB	BB	AA	AA	BB	AA	AA	BB	BB	AA	AA	-	BB	BB	AA	AB	BB	AA	AA	BB	AA	BB	-	AB	BB	BB	AA	AA	BB	AA	AA	BB	BB	-	AA	AA	AA
8_162833816	AA	AA	AA	AA	AA	AA	BB	AA	BB	AA	AA	BB	BB	BB	AA	AA	BB	AA	AA	BB	BB	AA	AA	BB	BB	BB	AA	AA	AA	AB	AA	BB	AA	BB	BB	AB	BB	BB	BB	AA	BB	AA	AA	AA	BB	BB	AA	AA	AA
8_163773406	AA	AA	AA	AA	AA	AA	BB	AA	BB	AA	AA	BB	BB	BB	AA	AA	BB	AA	AA	BB	AA	AA	AA	BB	BB	BB	AA	AA	AA	AB	AA	BB	AA	BB	BB	AB	BB	BB	BB	AA	BB	AA	AA	AA	BB	BB	AA	AA	AA
8_163773418	AA	AA	AA	AA	AA	AA	BB	AA	BB	AA	AA	BB	BB	BB	AA	AA	BB	AA	AA	BB	AA	AA	AA	BB	BB	BB	AA	AA	AA	AB	AA	BB	AA	BB	BB	AB	BB	BB	BB	AA	BB	AA	AA	AA	BB	BB	AA	AA	AA
8_163773445	AA	AA	AA	AA	AA	AA	BB	AA	BB	AA	AA	BB	BB	BB	AA	AA	BB	AA	AA	BB	AA	AA	AA	BB	BB	BB	AA	AA	AA	AB	AA	BB	AA	BB	BB	AB	BB	BB	BB	AA	BB	AA	AA	AA	BB	BB	AA	AA	AA
8_164641573	AA	AA	AA	AA	AA	AB	AB	AA	BB	AA	AA	BB	BB	BB	AA	AA	BB	AA	AA	BB	AA	AA	AA	BB	BB	BB	AA	AA	AA	AB	AA	BB	AA	BB	BB	AB	BB	BB	BB	AA	BB	AA	AA	-	BB	BB	BB	AA	AA
8_170482658	AA	AA	AA	AA	BB	AA	BB	AA	BB	AA	AA	AA	BB	BB	AA	AA	BB	AA	AA	BB	AA	AA	AA	BB	BB	BB	AA	AA	AA	BB	AA	AA	AA	BB	BB	AB	BB	BB	BB	AA	BB	AA	AA	AA	BB	BB	BB	AA	AA
8_171966414	AA	AA	AA	AA	BB	AA	BB	AA	BB	AA	AA	AA	BB	BB	AA	AA	BB	AA	AA	BB	AA	AA	AA	BB	BB	BB	AA	AA	AA	BB	AA	AA	AA	BB	BB	AB	BB	BB	BB	AA	BB	AA	AA	-	BB	BB	BB	AA	AA
8_171966415	AA	AA	AA	AA	BB	AA	BB	AA	BB	AA	AA	AA	BB	BB	AA	AA	BB	AA	AA	BB	AA	AA	AA	BB	BB	BB	AA	AA	AA	BB	AA	AA	AA	BB	BB	AB	BB	BB	BB	AA	BB	AA	AA	-	BB	BB	BB	AA	AA
8_174335908	AA	AA	AA	AA	BB	AA	BB	AA	BB	AA	AA	AA	BB	BB	AA	AA	BB	AA	AA	BB	AA	AA	AA	BB	BB	BB	AA	AA	AA	BB	AA	AA	AA	BB	BB	AB	BB	BB	BB	AA	BB	AA	AA	AA	BB	BB	BB	AA	AA
8_174335920	AA	AA	AA	AA	BB	AA	BB	AA	BB	AA	AA	AA	BB	BB	AA	AA	BB	AA	AA	BB	AA	AA	AA	BB	BB	BB	AA	AA	AA	BB	AA	AA	AA	BB	BB	AB	BB	BB	BB	AA	BB	AA	AA	AA	BB	BB	BB	AA	AA
8_178811913	AA	AA	AA	AA	BB	AA	BB	AA	AB	AA	AA	AA	BB	BB	AA	AA	BB	AA	AA	BB	AA	AA	AA	BB	BB	BB	AA	AA	AA	BB	AA	AA	AA	BB	BB	AB	BB	BB	BB	AA	BB	AA	AA	AA	BB	BB	BB	AA	AA
8_178872148	AA	AA	AA	AA	BB	AA	BB	AA	AB	AA	AA	AA	BB	BB	AA	AA	BB	AA	AA	BB	AA	AA	AA	BB	BB	BB	AA	AA	AA	BB	AA	AA	AA	BB	BB	AB	BB	BB	BB	AA	BB	AA	AA	AA	BB	BB	BB	AA	AA
8_183777470	AA	AA	AA	AA	BB	BB	BB	AA	AB	BB	AB	AA	BB	BB	AA	AA	BB	AA	AA	BB	AA	AA	AA	BB	BB	BB	AA	AA	AA	BB	AA	AA	AA	BB	BB	AB	BB	BB	BB	AA	BB	AA	AA	AA	AB	BB	BB	AA	AA
8_183831371	AA	AA	AA	AA	BB	BB	BB	AA	AB	BB	-	AA	BB	BB	AA	AA	BB	AA	AA	BB	AA	AA	AA	BB	BB	BB	AA	AA	AA	BB	AA	AA	AA	BB	BB	AB	BB	BB	BB	AA	BB	AA	AA	AA	AB	BB	BB	AA	AA
8_183831464	AA	AA	AA	AA	BB	BB	BB	AA	AB	BB	-	AA	BB	BB	AA	AA	BB	AA	AA	BB	AA	AA	AA	BB	BB	BB	AA	AA	AA	BB	AA	AA	AA	BB	BB	AB	BB	BB	BB	AA	BB	AA	AA	AA	AB	BB	BB	AA	AA
8_184000074	AA	AA	AA	AA	BB	BB	BB	AA	AB	BB	AA	AA	BB	BB	AA	AA	BB	AA	AA	BB	AA	AA	AA	BB	BB	BB	AA	AA	AA	BB	AA	AA	AA	BB	BB	AB	BB	BB	BB	AA	BB	AA	AA	AA	AB	BB	BB	AA	AA
8_184497220	AA	AA	AA	AA	BB	BB	BB	AA	AB	BB	AA	AA	BB	BB	AA	AA	BB	AA	AA	BB	AA	AA	AA	BB	BB	BB	AA	AA	AA	BB	AA	AA	AA	BB	BB	AB	BB	BB	BB	AA	BB	AA	AA	AA	AB	BB	BB	AA	AA
8_185276939	AA	AA	AA	AA	BB	BB	BB	AA	AB	BB	AA	AA	BB	BB	AA	AA	BB	AA	AA	BB	AA	AA	AA	BB	BB	BB	AA	AA	AA	BB	AA	AA	AA	BB	BB	AB	BB	BB	BB	AA	BB	AA	AA	-	AB	BB	BB	AA	AA
8_185276988	AA	AA	AA	AA	BB	BB	BB	AA	AB	BB	AA	AA	BB	BB	AA	AA	BB	AA	AA	BB	AA	AA	AA	BB	BB	BB	AA	AA	AA	BB	AA	AA	AA	BB	BB	AB	BB	BB	BB	AA	BB	AA	AA	-	AB	BB	BB	AA	AA
8_185567159	AA	AA	AA	AA	BB	BB	BB	AA	AB	BB	AA	AA	BB	BB	AA	AA	BB	AA	AA	BB	AA	AA	AA	BB	BB	BB	AA	AA	AA	BB	AA	AA	AA	BB	BB	AB	BB	BB	BB	AA	BB	AA	AA	AA	AB	BB	BB	AA	AA
8_185567222	AA	AA	AA	AA	BB	BB	BB	AA	AB	BB	AA	AA	BB	BB	AA	AA	BB	AA	AA	BB	AA	AA	AA	BB	BB	BB	AA	AA	AA	BB	AA	AA	AA	BB	BB	AB	BB	BB	BB	AA	BB	AA	AA	AA	AB	BB	BB	AA	AA
8_185567270	AA	AA	AA	AA	BB	BB	BB	AA	AB	BB	AA	AA	BB	BB	AA	AA	BB	AA	AA	BB	AA	AA	AA	BB	BB	BB	AA	AA	AA	BB	AA	AA	AA	BB	BB	AB	BB	BB	BB	AA	BB	AA	AA	AA	AB	BB	BB	AA	AA
8_185567425	AA	AA	AA	AA	BB	BB	BB	AA	BB	BB	AA	AA	BB	BB	AA	AA	BB	AA	AA	BB	AA	AA	AA	BB	BB	BB	AA	AA	AA	BB	AA	AA	AA	BB	BB	AB	BB	BB	BB	AA	BB	AA	AA	AA	AB	BB	BB	AA	AA
8_186530197	AA	AA	AA	AA	BB	BB	BB	AA	AB	BB	AA	AA	BB	BB	AA	AA	BB	AA	AA	BB	AA	AA	AA	BB	BB	BB	AA	AA	AA	BB	AA	AA	AA	BB	BB	AB	BB	BB	BB	AA	BB	AA	AA	AA	AB	BB	BB	AA	AA
8_187746647	AA	AA	AA	AA	BB	BB	BB	AA	AB	BB	AA	BB	AA	BB	AA	AA	BB	BB	AA	BB	AA	AA	AA	BB	BB	BB	AA	AA	AA	BB	AA	AA	AA	BB	BB	AB	BB	BB	BB	AA	BB	AA	AA	-	AB	BB	BB	AA	AA
8_187748049	AA	AA	AA	AA	BB	BB	BB	AA	AA	BB	AA	BB	AA	BB	AA	AA	BB	BB	AA	-	AA	AA	AA	BB	BB	BB	AA	AA	AA	BB	AA	AA	AA	BB	BB	AB	BB	BB	BB	AA	BB	AA	AA	AA	AA	BB	-	AA	AA
8_190325862	AA	AA	AA	AA	BB	BB	BB	AA	AB	BB	AA	BB	AA	BB	AA	AA	BB	BB	AA	BB	AA	AA	AA	BB	BB	BB	AA	AA	AA	BB	AA	AA	AA	BB	BB	AB	BB	BB	BB	AA	BB	AA	AA	AA	AB	AA	BB	AA	AA
8_191081535	AA	AA	AA	AA	BB	BB	BB	AA	AB	BB	AA	BB	AA	BB	AA	AA	BB	BB	AA	BB	AA	AA	AA	BB	BB	BB	AA	AA	AA	BB	AA	AA	AA	BB	BB	AB	BB	BB	BB	AA	BB	AA	AA	AA	AA	-	BB	AA	AA
8_191213536	AA	AA	AA	AA	BB	BB	BB	-	AB	BB	AA	BB	AA	BB	AA	AA	BB	BB	AA	BB	AA	AA	AA	BB	BB	BB	AA	AA	AA	BB	AA	AA	AA	BB	BB	AB	BB	BB	BB	AA	BB	AA	AA	AA	AB	AA	BB	AA	AA
8_191213773	AA	AA	AA	AA	BB	BB	BB	AA	AB	BB	AA	BB	AA	BB	AA	AA	BB	BB	AA	BB	AA	AA	AA	BB	BB	BB	AA	AA	AA	BB	AA	AA	AA	BB	BB	AB	BB	BB	BB	AA	BB	AA	AA	AA	AB	AA	BB	AA	AA
8_191473410	AA	AA	AA	AA	BB	BB	BB	AA	AB	BB	AA	BB	AA	BB	AA	AA	BB	BB	AA	BB	AA	AA	AA	BB	BB	BB	AA	AA	AA	BB	AA	AA	AA	BB	BB	AB	BB	BB	BB	AA	BB	AA	AA	-	AA	AA	BB	AA	AA
8_194701823	AA	AA	AA	AA	BB	BB	BB	AA	BB	BB	AA	BB	AA	BB	AA	AA	AA	BB	BB	BB	AA	AA	AA	BB	BB	BB	AA	AA	AA	BB	AA	AA	AA	BB	BB	AA	BB	BB	AB	AA	BB	BB	AA	AA	AB	AA	BB	AA	BB
8_195832273	AA	AA	AA	AA	BB	BB	BB	AA	BB	BB	AA	BB	AA	BB	AA	AA	AA	BB	BB	BB	AA	AA	AA	BB	BB	BB	AB	AA	AA	BB	AA	AA	AA	BB	BB	AA	BB	BB	AB	AA	BB	BB	AA	-	AB	AA	BB	AA	BB
8_202971077	AA	AA	AA	AA	BB	BB	BB	AA	BB	BB	AA	BB	AA	BB	AA	AA	AA	BB	BB	BB	AA	AA	AA	BB	BB	BB	AA	AA	AA	BB	AA	AA	AA	BB	BB	AA	BB	BB	AB	AA	BB	AA	AA	AA	AB	AB	BB	AA	BB
8_202971128	AA	AA	AA	AA	BB	BB	BB	AA	BB	BB	AA	BB	AA	BB	AA	AA	AA	BB	BB	BB	AA	AA	AA	BB	BB	BB	AA	AA	AA	BB	AA	AA	AA	BB	BB	AA	BB	BB	AB	AA	BB	AA	AA	AA	AB	AB	BB	AA	BB
8_203034534	AA	AA	AA	AA	BB	BB	BB	AA	BB	BB	AA	BB	AA	BB	AA	AA	AA	BB	BB	BB	AA	AA	AA	BB	BB	BB	AA	AA	AA	BB	AA	AA	AA	BB	BB	AA	BB	BB	AB	AA	BB	AA	AA	AA	AB	AA	BB	AA	BB
8_203034539	AA	AA	AA	AA	BB	BB	BB	AA	BB	BB	AA	BB	AA	BB	AA	AA	AA	BB	BB	BB	AA	AA	AA	BB	BB	BB	AA	AA	AA	BB	AA	AA	AA	BB	BB	AA	BB	BB	AB	AA	BB	AA	AA	AA	AB	AA	BB	AA	BB
8_208906303	AA	AA	AA	AA	BB	BB	BB	AA	BB	BB	AA	BB	AA	BB	AA	AA	BB	BB	BB	BB	BB	AA	AA	BB	BB	BB	AA	AA	AA	BB	AA	AA	AA	BB	BB	AA	BB	BB	AA	AA	BB	AA	AA	AA	AA	AA	BB	AA	BB
8_211261379	AA	AA	AA	AA	BB	BB	AA	AA	BB	BB	AA	BB	AA	BB	BB	AA	BB	BB	BB	BB	BB	AA	AA	BB	BB	BB	AA	AA	AA	BB	AA	AA	AA	BB	BB	AA	BB	AA	AA	AA	BB	AA	AA	AA	AA	AA	BB	AA	BB
8_211261405	AA	AA	AA	AA	BB	BB	AA	AA	BB	BB	AA	BB	AA	BB	BB	AA	BB	BB	BB	BB	BB	AA	AA	BB	BB	BB	AA	AA	AA	BB	AA	AA	AA	BB	BB	AA	BB	AA	AA	AA	BB	AA	AA	AA	AA	AA	BB	AA	BB
8_215402131	-	AA	AA	AA	BB	BB	AA	AA	AA	BB	BB	BB	AA	BB	BB	AA	BB	BB	BB	BB	BB	AA	AA	BB	BB	BB	AA	AA	AA	BB	AA	AA	AA	BB	BB	AA	BB	AA	AA	AA	BB	AA	AA	AA	AA	AA	BB	AA	BB
8_215402163	-	AA	AA	AA	BB	BB	AA	AA	AA	BB	BB	BB	AA	BB	BB	AA	BB	BB	BB	BB	BB	AA	AA	BB	BB	BB	AA	AA	AA	BB	AA	AA	AA	BB	BB	AA	BB	AA	AA	AA	BB	AA	AA	AA	AA	AA	BB	AA	BB
8_216976478	AA	AA	AA	AA	BB	BB	AA	AA	AA	BB	BB	BB	AA	BB	BB	AA	BB	BB	BB	BB	BB	AA	AA	BB	BB	BB	AA	AA	AA	BB	AA	AA	AA	BB	BB	AA	BB	AA	AA	AA	BB	AA	AA	AA	AA	AA	BB	AA	BB
8_222875915	AA	AA	AA	AA	BB	AB	AA	-	AB	BB	BB	BB	AA	BB	BB	AA	BB	BB	BB	BB	BB	AA	AA	BB	BB	BB	AA	AB	AA	BB	AA	AA	-	AA	BB	AA	BB	AA	AA	AA	BB	AB	AA	AA	AA	AA	BB	AA	BB
8_222906131	AA	AA	AA	AA	BB	AB	AA	AA	AB	BB	BB	BB	AA	BB	BB	AA	BB	BB	BB	BB	BB	AA	AA	BB	BB	BB	AA	AB	AA	BB	AA	AA	AA	AA	BB	AA	BB	AA	AA	AA	BB	AB	AA	AA	AA	AA	BB	AA	BB
8_222909575	AA	AA	AA	AA	BB	AB	AA	AA	AB	BB	BB	BB	AA	BB	BB	AA	BB	BB	BB	BB	BB	AA	AA	BB	BB	BB	AA	AB	AA	BB	AA	AA	AA	AA	BB	AA	BB	AA	AA	AA	BB	AB	AA	AA	AA	AA	BB	AA	BB
8_222909578	AA	AA	AA	AA	BB	AB	AA	AA	AB	BB	BB	BB	AA	BB	BB	AA	BB	BB	BB	BB	BB	AA	AA	BB	BB	BB	AA	AB	AA	BB	AA	AA	AA	AA	BB	AA	BB	AA	AA	AA	BB	AB	AA	AA	AA	AA	BB	AA	BB
8_222909628	AA	AA	AA	AA	BB	AB	AA	AA	AB	BB	BB	BB	AA	BB	BB	AA	BB	BB	BB	BB	BB	AA	AA	BB	BB	BB	AA	AB	AA	BB	AA	AA	AA	AA	BB	AA	BB	AA	AA	AA	BB	AB	AA	AA	AA	AA	BB	AA	BB
8_223013359	AA	AA	AA	AA	BB	AB	AA	AA	AB	BB	BB	BB	AA	BB	BB	AA	BB	BB	BB	BB	BB	AA	AA	BB	BB	BB	AA	AB	AA	BB	AA	AA	AA	AA	BB	AA	BB	AA	AA	AA	BB	AB	AA	AA	AA	AA	BB	AA	BB
8_223159642	AA	AA	AA	AA	BB	AB	AA	AA	AB	BB	BB	BB	AA	BB	BB	AA	BB	BB	BB	BB	BB	AA	AA	BB	BB	BB	AA	AB	AA	BB	AA	AA	AA	AA	BB	AA	BB	AA	AA	AA	BB	AB	AA	AA	AA	AA	BB	AA	BB
8_225115848	AA	AA	AA	AA	BB	AB	AA	AA	AB	BB	BB	BB	AA	BB	BB	AA	BB	BB	BB	BB	BB	AA	AA	BB	BB	BB	AA	AB	AA	BB	AA	AA	AA	AA	BB	AA	BB	AA	AA	AA	BB	AB	AA	AA	AA	AA	BB	AA	BB
8_225115883	AA	AA	AA	AA	BB	AB	AA	AA	AB	BB	BB	BB	AA	BB	BB	AA	BB	BB	BB	BB	BB	AA	AA	BB	BB	BB	AA	AB	AA	BB	AA	AA	AA	AA	BB	AA	BB	AA	AA	AA	BB	AB	AA	AA	AA	AA	BB	AA	BB
8_225115885	AA	AA	AA	AA	BB	AB	AA	AA	AB	BB	BB	BB	AA	BB	BB	AA	BB	BB	BB	BB	BB	AA	AA	BB	BB	BB	AA	AB	AA	BB	AA	AA	AA	AA	BB	AA	BB	AA	AA	AA	BB	AB	AA	AA	AA	AA	BB	AA	BB
8_225147788	AA	AA	AA	AA	BB	AB	AA	AA	AA	BB	BB	BB	AA	BB	BB	AA	BB	BB	BB	BB	BB	AA	AA	BB	BB	BB	AA	AB	AA	BB	AA	AA	AA	AA	-	AA	BB	AA	AA	AA	BB	AB	AA	AA	AA	AA	BB	AA	-
8_225147837	AA	AA	AA	AA	BB	AB	AA	AA	AA	BB	BB	BB	AA	BB	BB	AA	BB	BB	BB	BB	BB	AA	AA	BB	BB	BB	AA	AB	AA	BB	AA	AA	AA	AA	-	AA	BB	AA	AA	AA	BB	AB	AA	AA	AA	AA	BB	AA	-
8_225215050	AA	AA	AA	AA	BB	AB	AA	AA	AB	BB	BB	BB	AA	BB	BB	AA	BB	BB	BB	BB	BB	AA	BB	BB	BB	BB	AA	AB	AA	BB	AA	AA	AA	AA	BB	AA	BB	AA	AA	AA	BB	AB	AA	AA	AA	AA	BB	AA	BB
8_225215051	AA	AA	AA	AA	BB	AB	AA	AA	AB	BB	BB	BB	AA	BB	BB	AA	BB	BB	BB	BB	BB	AA	BB	BB	BB	BB	AA	AB	AA	BB	AA	AA	AA	AA	BB	AA	BB	AA	AA	AA	BB	AB	AA	AA	AA	AA	BB	AA	BB
8_227821937	AA	AA	AA	AA	BB	AB	AA	AA	AB	BB	BB	BB	AA	BB	BB	AA	BB	BB	BB	BB	BB	AA	BB	BB	BB	BB	AA	AB	AA	BB	AA	AA	AA	AA	BB	AA	BB	AA	AA	AA	BB	AB	AA	AA	AA	AA	BB	AA	BB
8_229518651	AA	AA	AA	AA	BB	AB	AA	AA	AB	BB	BB	BB	AA	BB	BB	AA	BB	BB	BB	BB	BB	AA	BB	BB	BB	BB	AA	AB	AA	BB	AA	AA	AA	AA	BB	AA	BB	AA	AA	AA	BB	AB	AA	AA	AA	AA	BB	AA	BB
8_229821768	AA	AA	AA	AA	BB	AB	AA	AA	AB	BB	BB	BB	AA	BB	BB	AA	BB	BB	BB	BB	BB	AA	BB	BB	BB	BB	AA	AB	AA	BB	AA	AA	AA	AA	BB	AA	BB	AA	AA	AA	BB	AB	AA	AA	AA	AA	BB	AA	BB
8_229821817	AA	AA	AA	AA	BB	AB	AA	AA	AB	BB	BB	BB	AA	BB	BB	AA	BB	BB	BB	BB	BB	AA	BB	BB	BB	BB	AA	AB	AA	BB	AA	AA	AA	AA	BB	AA	BB	AA	AA	AA	BB	AB	AA	AA	AA	AA	BB	AA	BB
8_229821846	AA	AA	AA	AA	BB	AB	AA	AA	AB	BB	BB	BB	AA	BB	BB	AA	BB	BB	BB	BB	BB	AA	BB	BB	BB	BB	AA	AB	AA	BB	AA	AA	AA	AA	BB	AA	BB	AA	AA	AA	BB	AB	AA	AA	AA	AA	BB	AA	BB
8_229821847	AA	AA	AA	AA	BB	AB	AA	AA	AB	BB	BB	BB	AA	BB	BB	AA	BB	BB	BB	BB	BB	AA	BB	BB	BB	BB	AA	AB	AA	BB	AA	AA	AA	AA	BB	AA	BB	AA	AA	AA	BB	AB	AA	AA	AA	AA	BB	AA	BB
8_230467486	AA	AA	AA	AA	BB	AB	AA	AA	AB	BB	BB	BB	AA	BB	BB	AA	BB	BB	BB	BB	BB	AA	BB	BB	BB	BB	AA	AB	AA	BB	AA	AA	AA	AA	BB	AA	BB	AA	AA	AA	BB	AB	AA	AA	AA	AA	BB	AA	BB
8_231448115	AA	AA	AA	AA	BB	AB	AA	AA	AB	BB	BB	BB	AA	BB	BB	AA	BB	BB	BB	BB	BB	AA	BB	BB	BB	BB	AA	AB	AA	BB	AA	AA	AA	AA	BB	AA	BB	AA	AA	AA	BB	AB	AA	AA	AA	AA	BB	AA	-
8_231836081	AA	AA	AA	AA	BB	AB	AA	AA	AB	BB	BB	BB	AA	BB	BB	AA	BB	BB	BB	BB	BB	AA	BB	BB	BB	BB	AA	AB	AA	BB	AA	AA	AA	AA	BB	AA	BB	AA	AA	AA	BB	AB	AA	AA	AA	AA	BB	AA	BB
8_231836093	AA	AA	AA	AA	BB	AB	AA	AA	AB	BB	BB	BB	AA	BB	BB	AA	BB	BB	BB	BB	BB	AA	BB	BB	BB	BB	AA	AB	AA	BB	AA	AA	AA	AA	BB	AA	BB	AA	AA	AA	BB	AB	AA	AA	AA	AA	BB	AA	BB
8_233990713	AA	AA	AA	AA	BB	AB	AA	AA	AB	BB	BB	BB	AA	BB	BB	AA	BB	BB	BB	BB	BB	AA	BB	BB	BB	BB	AA	BB	AA	BB	AA	AA	AA	AA	BB	AA	BB	AA	AA	AA	BB	AB	AA	AA	AA	AA	BB	AA	BB
8_233990779	AA	AA	AA	AA	BB	AB	AA	AA	AB	BB	BB	BB	AA	BB	BB	AA	BB	BB	BB	BB	BB	AA	BB	BB	BB	BB	AA	BB	AA	BB	AA	AA	AA	AA	BB	AA	BB	AA	AA	AA	BB	AB	AA	AA	AA	AA	BB	AA	BB
8_233990782	AA	AA	AA	AA	BB	AB	AA	AA	AB	BB	BB	BB	AA	BB	BB	AA	BB	BB	BB	BB	BB	AA	BB	BB	BB	BB	AA	BB	AA	BB	AA	AA	AA	AA	BB	AA	BB	AA	AA	AA	BB	AB	AA	AA	AA	AA	BB	AA	BB
8_234274765	AA	AA	AA	AA	BB	AB	AA	AA	AB	BB	BB	BB	AA	BB	BB	AA	BB	BB	BB	BB	BB	AA	BB	BB	BB	BB	AA	BB	AA	BB	AA	AA	AA	AA	BB	AA	BB	AA	AA	AA	BB	AB	AA	AA	AA	AA	BB	AA	BB
8_234330795	AA	AA	AA	AA	BB	AB	AA	AA	AB	BB	BB	BB	AA	BB	BB	AA	BB	BB	BB	BB	BB	AA	BB	BB	BB	BB	AA	BB	AA	BB	AA	AA	AA	AA	BB	AA	BB	AA	AA	AA	BB	AB	AA	AA	AA	AA	BB	AA	BB
8_239590580	AA	AA	AA	AA	BB	BB	AA	AA	AB	BB	AA	BB	AA	BB	BB	AA	BB	BB	BB	BB	AA	AA	BB	BB	BB	BB	AA	BB	AA	BB	AA	AA	AA	AA	BB	AA	BB	AA	AB	AA	AA	AA	AA	-	AA	AA	BB	BB	BB
8_241185074	AA	AA	AA	AA	BB	AB	AA	AA	AB	BB	AA	BB	AA	BB	BB	AA	BB	BB	BB	BB	AA	AA	BB	BB	BB	BB	AA	BB	AA	BB	AA	AA	AA	AA	BB	AA	BB	AA	AA	AA	AA	AB	AA	AA	AA	AA	BB	BB	BB
8_266498968	AA	AA	AA	AA	BB	AB	AA	BB	AB	BB	AA	BB	AA	BB	BB	AA	BB	BB	BB	BB	AA	AA	BB	BB	BB	BB	BB	BB	AA	BB	AA	AA	AA	AA	BB	AA	BB	BB	AA	AA	AA	AB	AA	AA	AA	AA	BB	BB	BB
8_266936825	AA	AA	AA	AA	AB	BB	AA	BB	-	BB	AA	BB	AA	BB	BB	AA	BB	BB	BB	BB	AA	AA	BB	BB	BB	BB	BB	BB	AA	BB	AA	AA	AA	AA	BB	AA	BB	BB	AA	AA	AA	AB	AA	AA	AA	AA	BB	BB	BB
8_275427079	AB	AA	AB	AA	AB	AA	AA	BB	AB	BB	AA	BB	AA	AA	BB	AA	BB	BB	BB	BB	AA	AA	BB	BB	BB	BB	BB	BB	AA	BB	AA	AA	AA	AA	BB	AA	BB	BB	AB	AA	AA	AB	AA	AA	AA	AA	BB	BB	BB
8_275427114	AB	AA	AB	AA	AB	AA	AA	BB	AB	BB	AA	BB	AA	AA	BB	AA	BB	BB	BB	BB	AA	AA	BB	BB	BB	BB	BB	BB	AA	BB	AA	AA	AA	AA	BB	AA	BB	BB	AB	AA	AA	AB	AA	AA	AA	AA	BB	BB	BB
8_275864251	AB	AA	BB	AA	AB	AA	AA	BB	AB	BB	AA	BB	AA	AA	BB	AA	BB	BB	BB	BB	AA	AA	BB	BB	BB	BB	BB	BB	AA	BB	AA	AA	BB	AA	BB	AA	BB	-	AB	AA	AA	AA	AA	AA	AA	AA	BB	BB	BB
8_276933020	AB	AA	BB	AA	AB	AA	AA	BB	AB	BB	AA	BB	AA	AA	AA	AA	BB	BB	BB	BB	AA	AA	BB	BB	BB	BB	BB	BB	AA	BB	AA	AA	BB	AA	BB	AA	BB	BB	AB	AA	AA	AA	AA	AA	AA	AA	BB	BB	BB
8_280521268	AB	AA	AB	AA	AB	AA	AA	BB	AB	BB	AA	BB	AA	AA	AA	AA	BB	BB	BB	BB	AA	AA	BB	BB	BB	BB	BB	BB	AA	BB	AA	AA	BB	AA	BB	AA	BB	BB	AB	AA	AA	AA	AA	AA	AA	AA	BB	BB	BB
8_280522765	AB	AA	AB	AA	AB	AA	AA	BB	AB	BB	AA	BB	AA	AA	AA	AA	BB	BB	BB	BB	AA	AA	BB	BB	BB	BB	BB	BB	AA	BB	AA	AA	BB	AA	BB	AA	BB	BB	AB	AA	AA	AA	AA	AA	AA	AA	BB	BB	BB
8_287309392	AB	AA	BB	AA	AB	AA	AA	BB	AB	BB	AA	BB	AA	AA	AA	AA	BB	BB	BB	BB	AA	BB	BB	BB	BB	BB	BB	BB	BB	BB	AA	AA	BB	AA	BB	BB	BB	BB	AB	AA	AA	AA	AA	AA	AA	AA	BB	AA	BB
8_296731861	AB	AA	BB	AA	AB	AA	AA	BB	AB	BB	AA	BB	BB	AA	AA	AA	AA	BB	BB	BB	AA	BB	BB	BB	AA	BB	BB	BB	BB	BB	AA	AA	BB	AA	BB	BB	BB	AB	AB	AA	AA	AA	AA	AA	AA	AA	BB	AA	BB
8_307443832	AB	AA	BB	AA	AB	AA	AA	-	AB	BB	AA	BB	AA	AA	AA	AA	AA	BB	BB	BB	AA	BB	BB	BB	AA	BB	AA	BB	BB	BB	AA	AA	BB	AA	BB	BB	AA	AB	AB	AA	AA	AA	AB	AA	AA	AA	BB	AA	BB
9_5178775	BB	AA	BB	BB	BB	AA	AA	BB	BB	AA	AA	AA	BB	AA	BB	BB	AA	BB	BB	AA	BB	AA	BB	AA	BB	BB	BB	BB	BB	BB	BB	BB	AA	BB	AA	AB	AA	BB	BB	AA	BB	AA	AA	AA	BB	BB	BB	AA	BB
9_9430716	BB	AA	BB	AB	BB	AA	AA	BB	BB	AA	AA	AA	BB	AA	BB	AA	AA	BB	BB	AA	BB	AA	BB	AA	BB	AA	BB	BB	BB	BB	BB	BB	AA	BB	AA	AB	AA	BB	BB	AA	BB	AA	AA	AA	BB	BB	BB	AA	BB
9_10161237	BB	AA	BB	AB	BB	AA	AA	BB	BB	AA	AA	AA	BB	AA	BB	AA	AA	BB	BB	AA	BB	AA	BB	AA	BB	AA	BB	BB	BB	BB	BB	BB	AA	BB	AA	AB	AA	BB	BB	AA	BB	AA	AA	AA	BB	BB	BB	AA	BB
9_10321730	BB	AA	BB	AB	BB	AA	AA	BB	BB	AA	AA	AA	BB	AA	BB	AA	AA	BB	BB	AA	BB	AA	BB	AA	BB	AA	BB	BB	BB	BB	BB	BB	AA	BB	AA	AB	AA	BB	BB	AA	BB	AA	AA	AA	BB	BB	BB	AA	BB
9_10635540	BB	AA	BB	AB	BB	AA	AA	BB	BB	AA	AA	AA	BB	AA	BB	AA	AA	BB	BB	AA	BB	AA	BB	AA	BB	AA	BB	BB	BB	BB	BB	BB	AA	BB	AA	AB	AA	BB	BB	AA	BB	AA	AA	AA	BB	BB	BB	AA	BB
9_10755542	BB	AA	BB	AB	BB	AA	AA	BB	BB	AA	AA	AA	BB	AA	BB	AA	AA	BB	BB	AA	BB	AA	BB	AA	BB	AA	BB	BB	BB	BB	BB	BB	AA	BB	AA	AB	AA	BB	BB	AA	BB	AA	AA	AA	BB	BB	BB	AA	BB
9_10755552	BB	AA	BB	AB	BB	AA	AA	BB	BB	AA	AA	AA	BB	AA	BB	AA	AA	BB	BB	AA	BB	AA	BB	AA	BB	AA	BB	BB	BB	BB	BB	BB	AA	BB	AA	AB	AA	BB	BB	AA	BB	AA	AA	AA	BB	BB	BB	AA	BB
9_30276076	BB	AA	BB	AA	AB	AA	AB	BB	BB	AA	AA	AB	BB	AA	BB	AA	AA	BB	BB	BB	BB	AA	BB	AA	AA	AA	BB	BB	BB	BB	BB	AA	AA	BB	AA	BB	AA	BB	AA	AB	BB	AA	AA	BB	BB	BB	AA	AA	BB
9_30325568	BB	AA	BB	AA	AB	AA	AB	BB	BB	AA	AA	AB	BB	AA	BB	AA	AA	BB	BB	BB	BB	AA	BB	AA	AA	AA	BB	BB	BB	BB	BB	AA	AA	BB	AA	BB	AA	BB	AA	AB	BB	AA	AA	BB	BB	BB	AA	AA	BB
9_31611003	BB	AA	BB	AA	AB	AA	AB	BB	BB	AA	-	AB	BB	AA	BB	AA	AA	BB	BB	BB	BB	AA	BB	AA	AA	AA	BB	BB	BB	BB	BB	AA	AA	BB	AA	BB	AA	BB	AA	AB	-	AA	AA	BB	-	BB	AA	AA	BB
9_31611004	BB	AA	BB	AA	AB	AA	AB	BB	BB	AA	-	AB	BB	AA	BB	AA	AA	BB	BB	BB	BB	AA	BB	AA	AA	AA	BB	BB	BB	BB	BB	AA	AA	BB	AA	BB	AA	BB	AA	AB	-	AA	AA	BB	-	BB	AA	AA	BB
9_34010623	AA	AA	AB	AA	AA	AA	AB	-	BB	AA	AA	BB	AA	AA	BB	AA	AA	BB	BB	BB	BB	AA	BB	AA	AA	AA	BB	BB	BB	BB	BB	AA	AA	BB	AA	BB	BB	BB	AA	AA	AB	AA	AA	BB	AA	BB	AA	AA	BB
9_34010637	AA	AA	AB	AA	AA	AA	AB	-	BB	AA	AA	BB	AA	AA	BB	AA	AA	BB	BB	BB	BB	AA	BB	AA	AA	AA	BB	BB	BB	BB	BB	AA	AA	BB	AA	BB	BB	BB	AA	AA	AB	AA	AA	BB	AA	BB	AA	AA	BB
9_34067360	AB	AA	AB	AA	AA	AA	AB	BB	BB	AA	AA	BB	AA	AA	BB	AA	AA	BB	BB	BB	BB	AA	BB	AA	AA	AA	BB	BB	BB	BB	BB	AA	AA	BB	AA	BB	BB	BB	AA	AA	AB	AA	AA	BB	AA	BB	AA	AA	BB
9_34286229	AB	AA	AB	AA	AA	AA	AB	BB	BB	AA	AA	BB	AA	AA	BB	AA	AA	BB	BB	BB	BB	AA	BB	AA	AA	AA	BB	BB	BB	BB	BB	AA	AA	BB	AA	BB	BB	BB	AA	AA	BB	AA	AA	BB	AA	BB	AA	AA	BB
9_34286282	AB	AA	AB	AA	AA	AA	AB	BB	BB	AA	AA	BB	AA	AA	BB	AA	AA	BB	BB	BB	BB	AA	BB	AA	AA	AA	BB	BB	BB	BB	BB	AA	AA	BB	AA	BB	BB	BB	AA	AA	BB	AA	AA	BB	AA	BB	AA	AA	BB
9_34286303	AB	AA	AB	AA	AA	AA	AB	BB	BB	AA	AA	BB	AA	AA	BB	AA	AA	BB	BB	BB	BB	AA	BB	AA	AA	AA	BB	BB	BB	BB	BB	AA	AA	BB	AA	BB	BB	BB	AA	AA	BB	AA	AA	BB	AA	BB	AA	AA	BB
9_34357971	AB	AA	AB	AA	AA	AA	AB	BB	BB	AA	AA	BB	AA	AA	BB	AA	AA	BB	BB	BB	BB	AA	BB	AA	AA	AA	BB	BB	BB	BB	BB	AA	AA	BB	AA	BB	BB	BB	AA	AA	AB	AA	AA	BB	AA	BB	AA	AA	BB
9_34358007	AB	AA	AB	AA	AA	AA	AB	BB	BB	AA	AA	BB	AA	AA	BB	AA	AA	BB	BB	BB	BB	AA	BB	AA	AA	AA	BB	BB	BB	BB	BB	AA	AA	BB	AA	BB	BB	BB	AA	AA	AB	AA	AA	BB	AA	BB	AA	AA	BB
9_34387219	AB	AA	BB	AA	AA	AA	AB	BB	BB	AA	AA	BB	AA	AA	BB	AA	AA	BB	BB	BB	BB	AA	BB	AA	AA	AA	BB	BB	BB	BB	BB	AA	AA	BB	AA	BB	BB	BB	AA	AA	AA	AA	AA	BB	AA	BB	AA	AA	BB
9_34456119	AB	AA	AB	AA	AA	AA	AB	BB	BB	AA	AA	BB	AA	AA	BB	AA	AA	BB	BB	BB	BB	AA	BB	AA	AA	AA	BB	BB	BB	BB	BB	AA	AA	BB	AA	BB	BB	BB	AA	AA	AB	AA	AA	BB	AA	BB	AA	AA	BB
9_34474889	AB	AA	BB	AA	AA	AA	AB	BB	BB	AA	AA	BB	AA	AA	BB	AA	AA	BB	BB	BB	BB	AA	BB	AA	AA	AA	BB	BB	BB	BB	BB	AA	AA	BB	AA	BB	BB	BB	AA	AA	AB	AA	AA	BB	AA	BB	AA	AA	BB
9_34474896	AB	AA	BB	AA	AA	AA	AB	BB	BB	AA	AA	BB	AA	AA	BB	AA	AA	BB	BB	BB	BB	AA	BB	AA	AA	AA	BB	BB	BB	BB	BB	AA	AA	BB	AA	BB	BB	BB	AA	AA	AB	AA	AA	BB	AA	BB	AA	AA	BB
9_36853185	AA	AA	BB	AA	AA	AA	AB	BB	BB	AA	AA	BB	AA	AA	BB	AA	AA	BB	BB	BB	BB	AA	BB	AA	AA	AA	BB	BB	BB	BB	BB	AA	AA	BB	AA	BB	BB	BB	AA	AA	AB	AA	AA	BB	AA	BB	AA	AA	BB
9_37344830	AA	AA	AB	AA	AA	AA	AB	BB	BB	AA	AA	BB	AA	AA	BB	AA	AA	BB	BB	BB	BB	AA	BB	AA	AA	AA	BB	BB	BB	BB	BB	AA	BB	BB	AA	BB	BB	BB	AA	AA	AB	AA	AA	BB	AA	BB	AA	AA	BB
9_40874934	AA	AA	AB	AA	AA	AA	AB	BB	BB	AA	AA	BB	AA	AA	BB	AA	AA	BB	BB	BB	BB	AA	BB	AA	AA	AA	BB	BB	AB	BB	BB	AA	BB	BB	AA	BB	BB	BB	AA	AA	AB	AA	AA	BB	AA	BB	AA	AA	BB
9_44530658	AA	AA	AB	AA	AA	AA	AB	BB	BB	AA	AA	BB	AA	AA	BB	AA	AA	BB	BB	BB	BB	AA	BB	AA	AA	AA	BB	BB	AB	BB	BB	AA	BB	BB	AA	BB	BB	BB	AA	AA	AB	AA	AA	BB	AA	BB	AA	AA	BB
9_44530677	AA	AA	AB	AA	AA	AA	AB	BB	BB	AA	AA	BB	AA	AA	BB	AA	AA	BB	BB	BB	BB	AA	BB	AA	AA	AA	BB	BB	AB	BB	BB	AA	BB	BB	AA	BB	BB	BB	AA	AA	AB	AA	AA	BB	AA	BB	AA	AA	BB
9_44608636	AA	AA	AB	AA	AA	AA	AB	BB	BB	AA	AA	BB	AA	AA	BB	AA	AA	BB	BB	BB	BB	AA	BB	AA	AA	AA	BB	BB	AB	BB	BB	AA	BB	BB	AA	BB	BB	BB	AA	AA	AB	AA	AA	BB	AA	BB	AA	AA	BB
9_44608640	AA	AA	AB	AA	AA	AA	AB	BB	BB	AA	AA	BB	AA	AA	BB	AA	AA	BB	BB	BB	BB	AA	BB	AA	AA	AA	BB	BB	AB	BB	BB	AA	BB	BB	AA	BB	BB	BB	AA	AA	AB	AA	AA	BB	AA	BB	AA	AA	BB
9_45293846	AA	AA	AB	AA	AA	AA	AB	BB	BB	AA	AA	BB	AA	AA	BB	AA	AA	BB	BB	BB	BB	AA	BB	AA	AA	AA	BB	BB	AB	BB	BB	AA	BB	BB	AA	BB	BB	BB	AA	AA	AB	AA	AA	BB	AA	BB	AA	AA	BB
9_46172169	AA	AA	AB	AA	AA	AA	AB	BB	BB	AA	AA	BB	AA	AA	AA	AA	AA	BB	BB	BB	BB	AA	BB	AA	AA	AA	BB	BB	AB	BB	BB	AA	BB	BB	AA	BB	BB	BB	AA	AA	AB	AA	AA	BB	AA	BB	AA	AA	BB
9_46172178	AA	AA	AB	AA	AA	AA	AB	BB	BB	AA	AA	BB	AA	AA	AA	AA	AA	BB	BB	BB	BB	AA	BB	AA	AA	AA	BB	BB	AB	BB	BB	AA	BB	BB	AA	BB	BB	BB	AA	AA	AB	AA	AA	BB	AA	BB	AA	AA	BB
9_47799867	AA	AA	AB	AA	AA	AA	AB	AB	BB	AA	AA	BB	AA	AA	AA	AA	AA	BB	BB	BB	BB	AA	BB	AA	AA	AA	BB	BB	AB	BB	BB	AA	BB	BB	AA	BB	BB	BB	AA	AA	AB	AA	AA	BB	AA	BB	AA	AA	BB
9_47799870	AA	AA	AB	AA	AA	AA	AB	AB	BB	AA	AA	BB	AA	AA	AA	AA	AA	BB	BB	BB	BB	AA	BB	AA	AA	AA	BB	BB	AB	BB	BB	AA	BB	BB	AA	BB	BB	BB	AA	AA	AB	AA	AA	BB	AA	BB	AA	AA	BB
9_47898420	AA	AA	AB	AA	AA	AA	AB	AB	BB	AA	AA	BB	AA	AA	AA	AA	AA	BB	BB	BB	BB	AA	BB	AA	AA	AA	BB	BB	AB	BB	BB	AA	BB	BB	AA	BB	BB	BB	AA	AA	AB	AA	AA	BB	AA	BB	AA	AA	BB
9_47954417	AA	AA	AB	AA	AA	AA	AB	AB	BB	AA	AA	BB	AA	AA	AA	AA	AA	BB	BB	BB	BB	AA	BB	AA	AA	AA	BB	BB	AB	BB	BB	AA	BB	BB	AA	BB	BB	BB	AA	AA	AB	AA	AA	BB	AA	BB	AA	AA	BB
9_58088632	AA	AA	BB	AA	AA	AA	BB	-	BB	AA	AA	AA	AA	AA	AA	BB	AA	BB	BB	BB	BB	AA	-	AA	AA	AA	BB	BB	AA	AA	BB	AA	BB	BB	AA	AA	BB	AA	AA	BB	BB	AA	AA	BB	AA	BB	AA	AA	AA
9_58088869	AA	AA	BB	AA	AA	AA	BB	AB	BB	AA	AA	AA	AA	AA	AA	BB	AA	BB	BB	BB	BB	AA	AA	AA	AA	AA	BB	BB	AA	AA	BB	AA	BB	BB	AA	AA	BB	AA	AA	AB	AB	AA	AA	BB	AA	BB	AA	AA	AA
9_58088887	AA	AA	BB	AA	AA	AA	BB	AB	BB	AA	AA	AA	AA	AA	AA	BB	AA	BB	BB	BB	BB	AA	AA	AA	AA	AA	BB	BB	AA	AA	BB	AA	BB	BB	AA	AA	BB	AA	AA	AB	AB	AA	AA	BB	AA	BB	AA	AA	AA
9_58107747	AA	AA	BB	AA	AA	AA	BB	AB	BB	AA	AA	AA	AA	AA	AA	BB	AA	BB	BB	BB	BB	AA	AA	AA	AA	AA	BB	BB	AA	AA	BB	AA	BB	BB	AA	AA	BB	AA	AA	AB	AB	AA	AA	BB	AA	BB	AA	AA	AA
9_60755256	AA	AA	BB	AA	AA	AA	BB	AB	BB	AA	AA	AA	AA	AA	AA	BB	AA	BB	BB	BB	BB	AA	AA	AA	AA	AA	BB	BB	AA	AA	BB	AA	BB	BB	AA	AA	BB	AA	AA	AA	AB	AA	AA	BB	AA	BB	AA	AA	AA
9_60755281	AA	AA	BB	AA	AA	AA	BB	AB	BB	AA	AA	AA	AA	AA	AA	BB	AA	BB	BB	BB	BB	AA	AA	AA	AA	AA	BB	BB	AA	AA	BB	AA	BB	BB	AA	AA	BB	AA	AA	AA	AB	AA	AA	BB	AA	BB	AA	AA	AA
9_60787538	AA	AA	BB	AA	AA	AA	BB	AB	BB	AA	AA	AA	AA	AA	AA	BB	AA	BB	BB	BB	BB	AA	AA	AA	AA	AA	BB	BB	AA	AA	BB	AA	BB	BB	AA	AA	BB	AA	AA	AA	AB	AA	AA	BB	AB	BB	AA	AA	AA
9_60787557	AA	AA	BB	AA	AA	AA	BB	AB	BB	AA	AA	AA	AA	AA	AA	BB	AA	BB	BB	BB	BB	AA	AA	AA	AA	AA	BB	BB	AA	AA	BB	AA	BB	BB	AA	AA	BB	AA	AA	AA	AB	AA	AA	BB	AB	BB	AA	AA	AA
9_60787558	AA	AA	BB	AA	AA	AA	BB	AB	BB	AA	AA	AA	AA	AA	AA	BB	AA	BB	BB	BB	BB	AA	AA	AA	AA	AA	BB	BB	AA	AA	BB	AA	BB	BB	AA	AA	BB	AA	AA	AA	AB	AA	AA	BB	AB	BB	AA	AA	AA
9_62282712	AA	AA	AB	BB	AA	AA	BB	AB	BB	AA	AA	AA	AA	AA	AA	BB	AA	BB	BB	BB	BB	AA	AA	AA	AA	AA	BB	BB	AA	AA	BB	AA	BB	-	AA	AB	BB	BB	AA	AA	AB	AA	AA	BB	AA	BB	AA	AA	AA
9_62282715	AA	AA	AB	BB	AA	AA	BB	AB	BB	AA	AA	AA	AA	AA	AA	BB	AA	BB	BB	BB	BB	AA	AA	AA	AA	AA	BB	BB	AA	AA	BB	AA	BB	-	AA	AB	BB	BB	AA	AA	AB	AA	AA	BB	AA	BB	AA	AA	AA
9_62282835	AA	AA	AB	BB	AA	AA	BB	AB	BB	AA	AA	AA	AA	AA	AA	BB	AA	BB	BB	BB	BB	AA	AA	AA	AA	AA	BB	BB	AA	AA	BB	AA	BB	BB	AA	AB	BB	BB	AA	AA	AB	AA	AA	BB	AA	BB	AA	AA	AA
9_62282874	AA	AA	AB	BB	AA	AA	BB	AB	BB	AA	AA	AA	AA	AA	AA	BB	AA	BB	BB	BB	BB	AA	AA	AA	AA	AA	BB	BB	AA	AA	BB	AA	BB	BB	AA	AB	BB	BB	AA	AA	AB	AA	AA	BB	AA	BB	AA	AA	AA
9_62770272	AA	AA	AB	BB	AA	AA	BB	AB	BB	AA	AA	AA	AA	AA	AA	BB	AA	BB	BB	BB	BB	AA	AA	AA	AA	AA	BB	BB	AA	AA	BB	AA	BB	BB	AA	AB	BB	BB	AA	AA	AB	AA	AA	BB	AA	BB	AA	AA	AA
9_63227701	AA	AA	BB	BB	AA	AA	BB	AB	BB	AA	AA	AA	AA	AA	AA	BB	AA	BB	BB	BB	BB	AA	AA	AA	AA	AA	BB	BB	AA	AA	BB	AA	BB	BB	AA	AB	BB	BB	AA	AA	AB	AA	AA	BB	AA	BB	AA	AA	AA
9_63616058	AA	AA	AB	BB	AA	AA	BB	AB	BB	AA	AA	AA	BB	AA	AA	BB	AA	BB	BB	BB	BB	AA	AA	AA	AA	AA	BB	BB	AA	AA	BB	AA	BB	BB	AA	AB	BB	BB	AA	AA	AB	AA	AA	BB	AA	BB	AA	AA	AA
9_63805520	AA	AA	BB	BB	AA	AA	BB	AB	BB	AA	AA	AA	BB	AA	AA	BB	AA	BB	BB	BB	BB	AA	AA	AA	AA	AA	AA	BB	AA	AA	BB	AA	BB	BB	AA	AB	BB	BB	AA	AA	AB	AA	AA	BB	AA	BB	AA	AA	AA
9_65189157	AA	AA	AB	BB	AA	AA	BB	AB	BB	AA	AA	AA	BB	AA	AA	BB	AA	BB	BB	BB	BB	AA	AA	AA	AA	AA	AA	BB	AA	AA	BB	AA	BB	BB	AA	AB	BB	BB	AA	AA	AB	AA	AA	BB	AA	BB	AA	AA	AA
9_66850638	AA	AA	AB	BB	AA	AA	BB	AA	BB	AA	AA	AA	BB	AA	AA	BB	AA	BB	BB	BB	BB	AA	AA	AA	AA	AA	AA	BB	AA	AA	BB	AA	BB	BB	BB	AB	BB	BB	AA	AA	AB	AA	AA	BB	AA	BB	AA	AA	AA
9_67476439	AA	AA	BB	BB	AA	AA	BB	AA	BB	AA	AA	AA	BB	AA	AA	BB	AA	BB	BB	BB	BB	AA	AA	AA	AA	AA	AA	BB	AA	AA	BB	AA	BB	BB	BB	AB	BB	BB	AA	AA	AB	AA	AA	BB	AA	BB	AA	AA	AA
9_67476463	AA	AA	BB	BB	AA	AA	BB	AA	BB	AA	AA	AA	BB	AA	AA	BB	AA	BB	BB	BB	BB	AA	AA	AA	AA	AA	AA	BB	AA	AA	BB	AA	BB	BB	BB	AB	BB	BB	AA	AA	AB	AA	AA	BB	AA	BB	AA	AA	AA
9_68100599	AA	AA	BB	BB	AA	AA	BB	AB	BB	AA	AA	AA	BB	AA	AA	BB	AA	BB	BB	BB	BB	AA	AA	AA	AA	AA	AA	BB	AA	AA	BB	AA	BB	BB	AA	BB	BB	BB	AA	AA	AA	AA	AA	BB	AA	BB	AA	AA	AA
9_68100674	AA	AA	BB	BB	AA	AA	BB	AB	BB	AA	AA	AA	BB	AA	AA	BB	AA	BB	BB	BB	BB	AA	AA	AA	AA	AA	AA	BB	AA	AA	BB	AA	BB	BB	AA	BB	BB	BB	AA	AA	AA	AA	AA	BB	AA	BB	AA	AA	AA
9_68238661	AA	AA	BB	BB	AA	AA	BB	AB	BB	AA	AA	AA	BB	AA	AA	BB	AA	BB	BB	BB	BB	AA	AA	AA	AA	AA	AA	BB	AA	AA	BB	AA	BB	BB	AA	AB	BB	BB	AA	AA	AB	AA	AA	BB	AA	BB	AA	AA	AA
9_73365842	AA	AA	AA	BB	AA	AB	BB	AA	AB	AA	AA	AA	AA	AA	AA	BB	AA	BB	BB	BB	BB	AA	AA	AA	AA	AA	BB	AA	AA	AA	BB	BB	BB	BB	AB	AB	BB	AA	AA	AA	BB	AA	AA	AA	AA	BB	AA	AA	AA
9_73663141	AA	AA	AB	BB	AA	AB	BB	AA	AB	AA	AA	AA	AA	AA	AA	BB	AA	BB	BB	BB	BB	AA	AA	AA	AA	AA	BB	AA	AA	AA	BB	AA	BB	BB	AB	AB	BB	AA	AA	AA	AB	AA	AA	AA	AA	BB	AA	AA	-
9_73754831	AA	AA	AB	BB	AA	AB	BB	AA	AB	AA	AA	AA	AA	AA	AA	BB	AA	BB	BB	BB	BB	AA	AA	AA	AA	AA	BB	AA	AA	AA	BB	AA	BB	BB	BB	AB	BB	AA	AA	AA	AB	AA	AA	AA	AA	BB	AA	AA	AA
9_73754855	AA	AA	AB	BB	AA	AB	BB	AA	AB	AA	AA	AA	AA	AA	AA	BB	AA	BB	BB	BB	BB	AA	AA	AA	AA	AA	BB	AA	AA	AA	BB	AA	BB	BB	BB	AB	BB	AA	AA	AA	AB	AA	AA	AA	AA	BB	AA	AA	AA
9_74045615	AA	AA	AB	BB	AA	AB	BB	AA	AB	AA	AA	AA	AA	AA	AA	BB	AA	BB	BB	BB	BB	AA	AA	AA	AA	AA	BB	AA	AA	AA	BB	AA	BB	BB	AB	AB	BB	AA	AA	AA	AB	AA	AA	AA	AA	BB	AA	AA	AA
9_74045625	AA	AA	AB	BB	AA	AB	BB	AA	AB	AA	AA	AA	AA	AA	AA	BB	AA	BB	BB	BB	BB	AA	AA	AA	AA	AA	BB	AA	AA	AA	BB	AA	BB	BB	AB	AB	BB	AA	AA	AA	AB	AA	AA	AA	AA	BB	AA	AA	AA
9_74224417	AA	AA	AB	BB	AA	AB	BB	AA	AB	AA	AA	AA	AA	AA	AA	BB	AA	BB	BB	BB	BB	AA	AA	AA	AA	AA	BB	AA	AA	AA	BB	AA	BB	BB	AB	AB	BB	AA	AA	AA	AB	AA	AA	AA	AA	BB	AA	AA	AA
9_76563441	AA	AA	AB	BB	AA	BB	BB	AA	BB	AA	AA	AA	AB	AA	-	BB	AA	BB	BB	BB	BB	AA	AA	AA	AA	AA	BB	AA	AA	AA	BB	AA	BB	BB	AB	AB	BB	AA	AA	AA	AB	AA	AA	-	AA	BB	AA	AA	AA
9_77205783	AA	AA	AA	BB	AA	AB	BB	AA	AA	AA	AA	AA	AA	AA	AA	BB	AA	BB	BB	BB	BB	AA	AA	AA	AA	AA	BB	AA	AA	AA	AA	BB	BB	BB	AB	AB	BB	AA	AA	AA	AB	AA	AA	AA	AA	BB	AA	AA	-
9_77205795	AA	AA	AA	BB	AA	AB	BB	AA	AA	AA	AA	AA	AA	AA	AA	BB	AA	BB	BB	BB	BB	AA	AA	AA	AA	AA	BB	AA	AA	AA	AA	BB	BB	BB	AB	AB	BB	AA	AA	AA	AB	AA	AA	AA	AA	BB	AA	AA	-
9_85449306	AA	AA	AB	BB	AA	BB	AA	AA	BB	AA	AA	AA	AA	AA	AA	BB	AA	AA	BB	BB	BB	AA	AA	BB	AA	AA	BB	AA	AA	AA	AA	BB	BB	BB	BB	AB	BB	AA	AB	AA	AA	AA	BB	AA	AA	BB	BB	AA	AA
9_85730412	AA	AA	BB	BB	AA	BB	AA	AA	BB	AA	AA	AA	AA	AA	AA	BB	AA	AA	BB	BB	BB	AA	AA	BB	AA	AA	BB	AA	AA	AA	AA	BB	BB	BB	BB	AB	BB	AA	AB	AA	AA	AA	BB	AA	AA	BB	BB	AA	AA
9_86597371	AA	AA	AB	BB	AA	BB	AA	AA	AB	AA	AA	AA	AA	AA	AA	BB	AA	AA	BB	BB	BB	AA	AA	BB	AA	AA	BB	AA	AA	AA	AA	BB	BB	BB	BB	AB	BB	AA	AB	AA	AA	AA	BB	-	AA	BB	BB	AA	AA
9_86713526	AA	AA	AB	BB	AA	BB	AA	AA	AB	AA	AA	AA	AA	AA	AA	BB	AA	AA	BB	BB	BB	AA	AA	BB	AA	AA	BB	AA	AA	AA	AA	BB	BB	BB	BB	AB	BB	AA	AB	AA	AA	AA	BB	AA	AA	BB	BB	AA	AA
9_87704572	AA	AA	AB	BB	AA	BB	AA	AA	AB	AA	AA	AA	AA	AA	AA	BB	AA	AA	BB	BB	BB	AA	AA	BB	AA	AA	BB	AA	AA	AA	AA	BB	BB	BB	BB	AB	BB	AA	AB	AA	AA	AA	BB	BB	AA	BB	BB	AA	AA
9_96922026	BB	AA	BB	BB	AA	BB	BB	AA	AB	AA	BB	AA	AA	AA	AA	BB	AA	AA	BB	AA	BB	AA	AA	BB	AA	AA	BB	AA	AA	AA	AA	BB	BB	BB	BB	BB	BB	AA	BB	AA	AA	AA	BB	BB	AA	BB	BB	BB	AA
9_130737867	BB	AA	BB	BB	AA	BB	BB	AA	BB	AA	BB	AA	AA	BB	AA	BB	AA	AA	BB	AA	BB	AA	AA	BB	AA	AA	BB	AA	AA	AA	AA	BB	BB	AA	BB	BB	BB	AB	BB	AA	AA	AA	AB	BB	AA	AA	BB	BB	AA
9_131074528	BB	AA	BB	BB	AA	BB	BB	AA	BB	AA	BB	AA	AA	BB	AA	BB	AA	AA	BB	AA	BB	AA	AA	BB	AA	AA	BB	AA	AA	AA	AA	BB	BB	AA	BB	BB	BB	AB	BB	AA	AA	AA	BB	BB	AA	AA	BB	BB	AA
9_131510976	BB	AA	BB	BB	AA	BB	BB	AA	BB	AA	BB	AA	AA	BB	AA	BB	AA	AA	BB	AA	BB	AA	AA	BB	AA	AA	BB	AA	AA	AA	AA	BB	BB	AA	BB	BB	BB	AB	BB	AA	AA	AA	AB	BB	AA	-	BB	BB	AA
9_133970971	BB	AA	BB	BB	-	BB	BB	AA	BB	AA	BB	AA	AA	BB	AA	BB	AA	AA	BB	AA	BB	AA	AA	BB	AA	AA	BB	AA	AA	AA	AA	BB	BB	AA	BB	BB	BB	AA	BB	AA	AA	AA	AB	BB	AA	AA	BB	BB	AA
9_137903968	BB	AA	BB	BB	AA	BB	BB	AA	BB	AA	BB	AA	AA	BB	AA	BB	AA	AA	BB	AA	BB	AA	AA	BB	AA	AA	BB	AA	BB	AA	BB	BB	BB	AA	BB	AB	BB	AB	BB	AA	AA	AA	AB	BB	AA	AA	BB	BB	AA
9_137903980	BB	AA	BB	BB	AA	BB	BB	AA	BB	AA	BB	AA	AA	BB	AA	BB	AA	AA	BB	AA	BB	AA	AA	BB	AA	AA	BB	AA	BB	AA	BB	BB	BB	AA	BB	AB	BB	AB	BB	AA	AA	AA	AB	BB	AA	AA	BB	BB	AA
9_138087661	BB	AA	BB	BB	AA	BB	BB	AA	BB	AA	BB	AA	AA	BB	AA	BB	AA	AA	BB	AA	BB	AA	AA	BB	AA	AA	BB	AA	BB	AA	BB	BB	BB	AA	-	AB	BB	AB	BB	AA	AA	AA	AA	BB	AA	AA	BB	BB	AA
9_138130432	BB	AA	BB	BB	AA	BB	BB	AA	BB	AA	BB	AA	AA	BB	AA	BB	AA	AA	BB	AA	BB	AA	AA	BB	AA	AA	BB	AA	BB	AA	BB	BB	BB	AA	BB	AB	BB	AB	BB	AA	AA	AA	AB	BB	AA	AA	BB	BB	AA
9_139054108	BB	AA	BB	BB	AA	BB	BB	AA	BB	AA	BB	AA	AB	BB	AA	BB	AA	AA	BB	AA	BB	AA	AA	BB	AA	AA	BB	AA	BB	AA	BB	BB	BB	AA	BB	AB	BB	AB	BB	AA	AA	BB	AB	BB	AA	AA	BB	BB	AA
9_139054806	BB	AA	BB	BB	AA	BB	BB	AA	BB	AA	BB	AA	AB	BB	AA	BB	AA	AA	BB	AA	BB	AA	AA	BB	AA	AA	BB	AA	AB	AA	BB	BB	BB	AA	BB	AB	BB	AB	BB	AA	AA	BB	AB	BB	AA	AA	BB	BB	AA
9_139054819	BB	AA	BB	BB	AA	BB	BB	AA	BB	AA	BB	AA	AB	BB	AA	BB	AA	AA	BB	AA	BB	AA	AA	BB	AA	AA	BB	AA	AB	AA	BB	BB	BB	AA	BB	AB	BB	AB	BB	AA	AA	BB	AB	BB	AA	AA	BB	BB	AA
9_140341697	BB	AA	BB	BB	AA	BB	BB	AA	BB	AA	BB	AA	AB	BB	AA	BB	AA	AA	BB	AA	BB	AA	AA	BB	AA	AA	BB	AA	BB	AA	BB	BB	BB	AA	BB	AB	BB	AB	BB	AA	AA	BB	AB	BB	AA	AA	BB	BB	AA
9_140341703	BB	AA	BB	BB	AA	BB	BB	AA	BB	AA	BB	AA	AB	BB	AA	BB	AA	AA	BB	AA	BB	AA	AA	BB	AA	AA	BB	AA	BB	AA	BB	BB	BB	AA	BB	AB	BB	AB	BB	AA	AA	BB	AB	BB	AA	AA	BB	BB	AA
9_140770926	BB	AA	BB	BB	AA	BB	BB	AA	BB	AA	BB	AA	AB	BB	AA	BB	AA	AA	BB	AA	BB	AA	AA	BB	AA	AA	BB	AA	BB	AA	BB	BB	BB	AA	BB	AB	BB	AB	BB	AA	AA	BB	AB	BB	AA	AA	BB	BB	AA
9_141789395	BB	AA	BB	BB	AA	BB	BB	AA	BB	AA	BB	AA	AB	BB	AA	BB	AA	AA	BB	AA	BB	AA	AA	BB	AA	AA	BB	AA	BB	AA	BB	BB	BB	AA	BB	AB	BB	AB	BB	AA	AA	BB	AB	BB	AA	AA	BB	BB	AA
9_141879203	BB	AA	BB	BB	AA	BB	BB	AA	BB	AA	BB	AA	AB	BB	AA	BB	AA	AA	BB	AA	BB	AA	AA	BB	AA	AA	BB	AA	BB	AA	BB	BB	BB	AA	BB	AB	BB	AB	BB	AA	AA	BB	AB	BB	AA	AA	BB	BB	AA
9_152881404	BB	BB	BB	BB	AA	BB	BB	BB	BB	AA	BB	AA	AB	BB	AA	BB	AB	AA	BB	AA	BB	AA	AA	BB	AA	AA	BB	AA	BB	AA	BB	BB	BB	AA	AA	AA	BB	BB	BB	AA	BB	BB	BB	BB	AA	AA	BB	AA	AA
9_167580513	AA	BB	AA	BB	AA	BB	AA	BB	BB	AA	BB	AA	BB	BB	AA	BB	AA	BB	AA	AA	BB	AA	AA	BB	AA	AA	BB	AA	BB	BB	BB	BB	BB	AA	AA	AA	BB	BB	AA	AA	BB	BB	BB	AB	AA	AA	BB	AA	AA
9_167580519	AA	BB	AA	BB	AA	BB	AA	BB	BB	AA	BB	AA	BB	BB	AA	BB	AA	BB	AA	AA	BB	AA	AA	BB	AA	AA	BB	AA	BB	BB	BB	BB	BB	AA	AA	AA	BB	BB	AA	AA	BB	BB	BB	AB	AA	AA	BB	AA	AA
9_169254718	AA	BB	AA	BB	AA	BB	AA	BB	BB	BB	BB	AA	BB	BB	AA	BB	AA	BB	AA	AA	BB	AA	AA	BB	AA	AA	BB	AA	BB	BB	BB	BB	BB	AA	AA	AA	BB	BB	AA	AA	BB	BB	BB	AB	AA	AA	BB	AA	AA
9_175949473	AA	BB	AA	BB	AA	BB	AA	BB	BB	BB	BB	AA	BB	BB	AA	BB	AA	BB	AA	AA	BB	AB	AA	BB	AA	AA	AA	AA	BB	BB	BB	BB	BB	AA	AA	AA	BB	BB	AA	AB	BB	BB	BB	AB	AA	AA	BB	AA	AA
9_177431433	AA	BB	AA	BB	AA	BB	AB	BB	BB	BB	BB	AA	BB	BB	AA	BB	AA	BB	AA	AA	BB	AA	AA	BB	AA	AA	AA	AA	BB	BB	BB	BB	BB	AA	AA	AA	BB	BB	AA	AB	BB	BB	BB	AB	AA	AA	BB	AA	AA
9_181035279	AA	BB	AA	BB	AA	BB	AB	BB	BB	AA	BB	AA	BB	BB	AA	AA	AA	BB	AA	AA	BB	AA	AA	AA	AA	AA	AA	AA	BB	BB	BB	BB	BB	AA	AA	AA	BB	BB	AA	AB	BB	BB	BB	AA	AA	AA	BB	AA	AB
9_181035523	AA	BB	AA	BB	AA	BB	AB	BB	BB	AA	BB	AA	BB	BB	AA	AA	AA	BB	AA	AA	BB	AA	AA	AA	AA	AA	AA	AA	BB	BB	BB	BB	BB	AA	AA	AA	BB	BB	AA	AB	-	BB	-	AA	AA	AA	BB	AA	AB
9_181135809	AA	BB	AA	BB	AA	BB	AB	BB	BB	AA	BB	AA	BB	BB	AA	AA	AA	BB	AA	AA	BB	AA	AA	AA	AA	AA	AA	AA	BB	AB	BB	BB	BB	AA	AA	AA	BB	BB	AA	AB	BB	BB	BB	AA	AA	AA	BB	AA	AB
9_181356057	AA	BB	AA	BB	AA	BB	AB	BB	BB	AA	BB	AA	BB	BB	AA	AA	AA	BB	AA	AA	BB	AA	AA	AA	AA	AA	AA	AA	BB	AB	AA	BB	BB	AA	AA	AA	BB	BB	AA	AB	BB	BB	BB	AA	AA	AA	BB	AA	AB
9_181909471	AA	BB	AA	BB	AA	BB	AB	BB	BB	AA	BB	AA	BB	BB	AA	AA	AA	BB	AA	AA	BB	AA	AA	AA	AA	AA	AA	AA	BB	AB	AA	BB	BB	AA	AA	AA	BB	BB	AA	AB	BB	BB	BB	AA	AA	AA	BB	AA	AB
9_181991163	AA	BB	AA	BB	AA	BB	AB	BB	BB	AA	BB	AA	BB	BB	AA	AA	AA	BB	AA	AA	BB	AA	AA	AA	AA	AA	AA	AA	BB	AB	AA	BB	BB	AA	AA	AA	BB	BB	AA	AB	BB	BB	BB	AA	AA	AA	BB	AA	AB
9_181991209	AA	BB	AA	BB	AA	BB	AB	BB	BB	AA	BB	AA	BB	BB	AA	AA	AA	BB	AA	AA	BB	AA	AA	AA	AA	AA	AA	AA	BB	AB	AA	BB	BB	AA	AA	AA	BB	BB	AA	AB	BB	BB	BB	AA	AA	AA	BB	AA	AB
9_183699805	AA	BB	AA	BB	AA	BB	AB	BB	BB	AA	BB	AA	BB	BB	AA	AA	AA	AA	AA	AA	AA	AA	BB	AA	AA	AA	AA	AA	BB	BB	AA	BB	BB	AA	AA	AA	BB	AA	AA	AB	BB	BB	BB	AA	AA	AA	BB	AA	AB
9_184502235	AA	BB	AA	BB	AA	BB	AB	BB	BB	AA	BB	AA	BB	AA	AA	AA	AA	AA	AA	AA	AA	AA	BB	AA	AA	AA	AA	AA	BB	BB	AA	BB	BB	AA	AA	AA	BB	AA	AA	AB	BB	BB	BB	AA	AA	AA	BB	AA	AB
9_185038404	AA	BB	AA	BB	AA	BB	AB	BB	BB	AA	BB	AA	BB	AA	AA	AA	AA	AA	AA	AA	AA	AA	BB	AA	AA	AA	AA	AA	BB	BB	AA	BB	BB	AA	AA	AA	BB	AA	AA	AB	BB	BB	BB	AA	AA	AA	BB	AA	BB
9_185225674	AA	BB	AA	BB	AA	BB	AB	BB	BB	AA	BB	AA	-	AA	AA	AA	AA	AA	AA	AA	AA	AA	BB	AA	AA	AA	AA	AA	BB	BB	AA	BB	BB	AA	AA	AA	BB	AA	AA	AB	BB	BB	BB	AA	AA	AA	BB	AA	AB
9_185225837	AA	BB	AA	BB	AA	BB	AB	BB	BB	AA	BB	AA	BB	AA	AA	AA	AA	AA	AA	AA	AA	AA	BB	AA	AA	AA	AA	AA	BB	BB	AA	BB	BB	AA	AA	AA	BB	AA	AA	BB	BB	BB	BB	AA	AA	AA	BB	AA	AB
9_185225884	AA	BB	AA	BB	AA	BB	AB	BB	BB	AA	BB	AA	BB	AA	AA	AA	AA	AA	AA	AA	AA	AA	BB	AA	AA	AA	AA	AA	BB	BB	AA	BB	BB	AA	AA	AA	BB	AA	AA	BB	BB	BB	BB	AA	AA	AA	BB	AA	AB
9_185225885	AA	BB	AA	BB	AA	BB	AB	BB	BB	AA	BB	AA	BB	AA	AA	AA	AA	AA	AA	AA	AA	AA	BB	AA	AA	AA	AA	AA	BB	BB	AA	BB	BB	AA	AA	AA	BB	AA	AA	BB	BB	BB	BB	AA	AA	AA	BB	AA	AB
9_185484691	AA	BB	AA	BB	AA	BB	AB	BB	BB	AA	BB	AA	BB	AA	AA	AA	AA	AA	AA	AA	AA	AA	BB	AA	AA	AA	AA	AA	BB	BB	AA	BB	BB	AA	AA	AA	BB	AA	AA	AB	BB	BB	BB	AA	AA	AA	BB	AA	AB
9_185484706	AA	BB	AA	BB	AA	BB	AB	BB	BB	AA	BB	AA	BB	AA	AA	AA	AA	AA	AA	AA	AA	AA	BB	AA	AA	AA	AA	AA	BB	BB	AA	BB	BB	AA	AA	AA	BB	AA	AA	AB	BB	BB	BB	AA	AA	AA	BB	AA	AB
9_185546868	AA	BB	AA	BB	AA	BB	AB	BB	BB	AA	BB	AA	BB	AA	AA	AA	AA	AA	AA	AA	AA	AA	BB	-	AA	AA	AA	AA	BB	BB	AA	BB	BB	AA	AA	AA	BB	AA	AA	AA	BB	BB	BB	AA	AA	AA	BB	AA	AB
9_186694199	AA	BB	AA	BB	AA	BB	AB	BB	BB	AA	BB	AA	BB	AA	AA	AA	AA	AA	AA	AA	AA	AA	BB	AA	AA	AA	AA	AA	BB	BB	AA	BB	BB	AA	AA	AA	BB	AA	AA	AB	BB	BB	BB	AA	AA	AA	BB	AA	AB
9_190083794	AA	BB	AA	BB	AA	BB	AB	BB	BB	AA	BB	AA	BB	AA	AA	AA	AA	AA	AA	AA	AA	AA	BB	AA	AA	AA	AA	AA	BB	BB	AA	BB	AA	AA	AA	AA	BB	AA	AA	AB	BB	BB	BB	AA	AA	AA	BB	AA	AA
9_190501770	AA	BB	-	BB	AA	BB	AB	BB	BB	AA	BB	AA	BB	AA	AA	AA	AA	AA	AA	AA	AA	AA	BB	AA	AA	AA	AA	AA	BB	BB	AA	BB	AA	AA	AA	AA	BB	AA	AA	AB	BB	BB	BB	AA	AA	AB	BB	AA	AB
9_190501817	AA	BB	-	BB	AA	BB	AB	BB	BB	AA	BB	AA	BB	AA	AA	AA	AA	AA	AA	AA	AA	AA	BB	AA	AA	AA	AA	AA	BB	BB	AA	BB	AA	AA	AA	AA	BB	AA	AA	AB	BB	BB	BB	AA	AA	AB	BB	AA	AB
9_190501818	AA	BB	-	BB	AA	BB	AB	BB	BB	AA	BB	AA	BB	AA	AA	AA	AA	AA	AA	AA	AA	AA	BB	AA	AA	AA	AA	AA	BB	BB	AA	BB	AA	AA	AA	AA	BB	AA	AA	AB	BB	BB	BB	AA	AA	AB	BB	AA	AB
9_190572263	AA	BB	AA	BB	AA	BB	AB	BB	BB	AA	BB	AA	BB	AA	AA	AA	AA	AA	AA	AA	AA	AA	BB	AA	AA	AA	AA	AA	BB	BB	AA	BB	AA	AA	AA	AA	BB	AA	AA	AB	BB	BB	BB	AA	AA	AB	BB	AA	BB
9_190731338	AA	BB	AA	BB	AA	BB	AB	BB	BB	AA	BB	AA	BB	AA	AA	AA	AA	AA	AA	BB	AA	AA	BB	AA	AA	AA	AA	AA	BB	BB	AA	BB	AA	AA	AA	AA	BB	AA	AA	AB	BB	BB	BB	AA	AA	AA	BB	AA	-
9_190731735	AA	BB	AA	BB	AA	BB	AB	BB	BB	AA	BB	AA	BB	AA	AA	AA	AA	AA	AA	BB	AA	AA	BB	AA	AA	AA	AA	AA	BB	BB	AA	BB	AA	AA	AA	AA	BB	AA	AA	AB	BB	BB	BB	AA	AA	AB	BB	AA	AB
9_190731771	AA	BB	AA	BB	AA	BB	AB	BB	BB	AA	BB	AA	BB	AA	AA	AA	AA	AA	AA	BB	AA	AA	BB	AA	AA	AA	AA	AA	BB	BB	AA	BB	AA	AA	AA	AA	BB	AA	AA	AB	BB	BB	BB	AA	AA	AB	BB	AA	AB
9_190731772	AA	BB	AA	BB	AA	BB	AB	BB	BB	AA	BB	AA	BB	AA	AA	AA	AA	AA	AA	BB	AA	AA	BB	AA	AA	AA	AA	AA	BB	BB	AA	BB	AA	AA	AA	AA	BB	AA	AA	AB	BB	BB	BB	AA	AA	AB	BB	AA	AB
9_190813899	AA	BB	AA	BB	AA	BB	AB	BB	-	AA	BB	AA	BB	AA	AA	AA	AA	AA	AA	BB	AA	AA	AB	AA	AA	AA	AA	AA	BB	BB	AA	BB	AA	AA	AA	AA	BB	AA	AA	AA	BB	BB	BB	AA	AA	AB	BB	AA	AB
[truncated: 78 more columns]
